# Supplementary material
Source: publisher site journal article supplement (https://www.degruyterbrill.com/publication/isbn/9783110713664/downloadAsset/9783110713664_SC%20RIEM%20and%20SNC%20RIEM%20firm%20sample.xlsx)
Supplement: Supplementary file 2 [file 9783110713664_SC%20RIEM%20and%20SNC%20RIEM%20firm%20sample.xlsx]

## Sheet: SC(RIEM)|SNC(RIEM) firm sample
Stata TimeSeries	Stata CrossSection		Descriptive(CrossSectional Information)						SC Dummy	DependentVariables				IndependentVariables						PeckingOrder			InteractiveDummies			Descriptive(Financials)
year	code	company	idm	market	ids	sector	idi	industry	dsc	blev1	mlev1	blev2	mlev2	prof	growth	size	tang	risk	gdp	debtissue	equityissue	def	idef	iblev1	imlev1	stockprice	marketcap	bookdebt	equityratio	nonfindebt
2012	1	SC Firm 1	1	US	1	MAN	9000	TECH	1	0.2568	0.0519569	0.148994	0.0270188	0.120748	4.94255	12.776	0.0507099	0.00991705	2.32108	-0.0505121	0.309615	0.259103	0.259103	0.2568	0.0519569	35.5667	3174325	173967	0.7432	0.160842
2013	1	SC Firm 1	1	US	1	MAN	9000	TECH	1	0.132527	0.0244462	0.0194391	0.00196443	0.101384	7.29543	13.1488	0.0411784	0.0111424	2.21931	-0.0259333	0.368726	0.342793	0.342793	0.132527	0.0244462	92.93	9592049	145496	0.867473	0.133287
2014	1	SC Firm 1	1	US	1	MAN	9000	TECH	1	0.132619	0.0523175	0.00719254	0.00260898	0.0534106	2.53489	13.3903	0.0536583	0.039887	2.3882	0.0372727	0.235653	0.272926	0.272926	0.132619	0.0523175	32.87	3665794	202373	0.867381	0.14644
2009	2	SC Firm 2	1	US	0	SERV	4000	HCARE	1	0.124416	0.0244462	0.0155032	0.00248931	0.126256	5.64956	12.8657	0.209424	0.0270354	-2.77553	-0.167603	0.185004	0.0174008	0.0174008	0.124416	0.0244462	24.41	4344980	97841	0.875584	0.110887
2010	2	SC Firm 2	1	US	0	SERV	4000	HCARE	1	0.15049	0.0244462	0.00598557	0.000701964	0.16493	7.29543	13.2011	0.16031	0.027474	2.53192	0.0538123	0.0732641	0.127076	0.127076	0.15049	0.0244462	40.275	7369842	152301	0.84951	0.145374
2011	2	SC Firm 2	1	US	0	SERV	4000	HCARE	1	0.186597	0.0244462	0	0	0.187796	7.29543	13.5714	0.118912	0.0181059	1.60145	0.0774009	0.0712987	0.1487	0.1487	0.186597	0.0244462	71.5	13257673	260256	0.813403	0.186599
2012	2	SC Firm 2	1	US	0	SERV	4000	HCARE	1	0.238327	0.0330035	0.0696367	0.00809812	0.162216	7.22127	13.9414	0.0633729	0.0156196	2.32108	0.138748	0.230092	0.368841	0.368841	0.238327	0.0330035	93.74	18250334	622883	0.761673	0.188903
2013	2	SC Firm 2	1	US	0	SERV	4000	HCARE	1	0.251493	0.0308952	0.0435231	0.00429898	0.182185	7.29543	14.2546	0.0606171	0.0144678	2.21931	0.0637469	0.0722634	0.13601	0.13601	0.251493	0.0308952	132.884	26172301	834376	0.748507	0.247948
2014	2	SC Firm 2	1	US	0	SERV	4000	HCARE	1	0.214172	0.0244462	0.0171156	0.00155874	0.229136	7.29543	14.6192	0.0933488	0.0314157	2.3882	0.0156041	0.0385025	0.0541066	0.0541066	0.214172	0.0244462	185.03	36831332	899944	0.785828	0.200488
2011	3	SC Firm 3	1	US	1	MAN	1	OILGAS	1	0.0850862	0.034657	0.00359735	0.00139179	0.250715	2.45509	12.3426	0.678045	0.00126529	1.60145	-0.0720949	0.410394	0.338299	0.338299	0.0850862	0.034657	29.45	1638049	58808	0.914914	0.081783
2012	3	SC Firm 3	1	US	1	MAN	1	OILGAS	1	0.274558	0.143768	0.207082	0.103835	0.114493	1.90973	12.4249	0.604338	0.0732212	2.32108	0.237299	0.281489	0.518788	0.518788	0.274558	0.143768	38.22	2580897	433353	0.725442	0.0968862
2013	3	SC Firm 3	1	US	1	MAN	1	OILGAS	1	0.196285	0.0895079	0.121438	0.0527068	0.0649247	2.19294	12.479	0.632568	0.0256076	2.21931	0.0353751	0.321672	0.357047	0.357047	0.196285	0.0895079	63.13	5377258	528623	0.803715	0.127625
2004	4	SC Firm 4	1	US	0	SERV	4000	HCARE	1	0.24077	0.0940953	0.114328	0.0405649	0.181584	2.55879	12.8574	0.148233	0.00776508	3.78574	-0.0285212	0.346817	0.318296	0.318296	0.24077	0.0940953	24.43	1084271	112622	0.75923	0.142764
2005	4	SC Firm 4	1	US	0	SERV	4000	HCARE	1	0.192303	0.071501	0.0816169	0.027941	0.173961	2.68951	12.9474	0.137987	0.00347139	3.34522	-0.0141698	0.0319714	0.0178016	0.0178016	0.192303	0.071501	22.51	1362121	104893	0.807697	0.120523
2006	4	SC Firm 4	1	US	0	SERV	4000	HCARE	1	0.16253	0.0698455	0.0567838	0.0227631	0.162934	2.327	13.0161	0.158494	0.011692	2.66663	-0.0206133	0.0437846	0.0231712	0.0231712	0.16253	0.0698455	31.51	1239669	93087	0.83747	0.112113
2007	4	SC Firm 4	1	US	0	SERV	4000	HCARE	1	0.183117	0.0688416	0.0242505	0.0081301	0.166823	2.65998	13.1547	0.191287	0.000179613	1.77857	0.0302521	0.0515034	0.0817555	0.0817555	0.183117	0.0688416	28.25	1508283	111509	0.816883	0.168157
2008	4	SC Firm 4	1	US	0	SERV	4000	HCARE	1	0.164201	0.07066	0.0109972	0.00428493	0.187884	2.32381	13.3011	0.212111	0.011512	-0.291621	-0.00743274	0.058877	0.0514443	0.0514443	0.164201	0.07066	27.575	1403085	106680	0.835799	0.159723
2009	4	SC Firm 4	1	US	0	SERV	4000	HCARE	1	0.200317	0.0959066	0.0326221	0.0140797	0.198011	2.08867	13.3777	0.202796	0.00670833	-2.77553	0.06012	0.0530444	0.113164	0.113164	0.200317	0.0959066	31.59	1436900	152427	0.799683	0.193558
2010	4	SC Firm 4	1	US	0	SERV	4000	HCARE	1	0.154164	0.0699412	0.00687489	0.00284807	0.198139	2.20419	13.425	0.186649	0.000587378	2.53192	-0.028764	0.0687837	0.0400197	0.0400197	0.154164	0.0699412	30.61	1708212	128459	0.845836	0.170713
2011	4	SC Firm 4	1	US	0	SERV	4000	HCARE	1	0.170306	0.0808943	0.00496358	0.00213436	0.168411	2.1053	13.4978	0.177424	0.0189424	1.60145	0.0293184	0.0263463	0.0556646	0.0556646	0.170306	0.0808943	40.84	1763036	155172	0.829694	0.191775
2004	5	SC Firm 5	1	US	1	MAN	3000	CGOODS	1	0.25234	0.207679	0.178476	0.144364	0.081319	1.21505	13.2068	0.127153	0.00818418	3.78574	0.0684272	0.0421714	0.110599	0.110599	0.25234	0.207679	10.335	658715	172659	0.74766	0.111552
2005	5	SC Firm 5	1	US	1	MAN	3000	CGOODS	1	0.229267	0.185049	0.148517	0.117498	0.0769003	1.23896	13.3374	0.124734	0.00687251	3.34522	-0.0148995	0.0163632	0.00146365	0.00146365	0.229267	0.185049	10.58	713987	162123	0.770733	0.118484
2006	5	SC Firm 5	1	US	1	MAN	3000	CGOODS	1	0.27766	0.196343	0.193689	0.132455	0.0884213	1.41416	13.5125	0.13653	0.0118739	2.66663	0.0929435	0.0724726	0.165416	0.165416	0.27766	0.196343	15.605	997489	243698	0.72234	0.122251
2004	6	SC Firm 6	1	US	0	SERV	4000	HCARE	1	0.212645	0.0886459	0	0	0.145241	2.39881	13.0003	0.0287727	0.0230253	3.78574	-0.00973863	0.00096428	-0.00877435	-0.00877435	0.212645	0.0886459	6.17482	365011	35504	0.787355	0.212645
2005	6	SC Firm 6	1	US	0	SERV	4000	HCARE	1	0.213697	0.0670335	0	0	0.156414	3.18792	13.0526	0.0251765	0.00880765	3.34522	0.0252773	0.0301597	0.055437	0.055437	0.213697	0.0670335	9.20445	560433	40267	0.786303	0.213697
2006	6	SC Firm 6	1	US	0	SERV	4000	HCARE	1	0.232325	0.059198	0	0	0.176864	3.92454	13.1454	0.0226159	0.0139207	2.66663	0.0455195	0.0247963	0.0703158	0.0703158	0.232325	0.059198	12.8711	795879	50079	0.767675	0.232325
2007	6	SC Firm 6	1	US	0	SERV	4000	HCARE	1	0.199903	0.0511657	0	0	0.19344	3.90698	13.2668	0.017681	0.0105574	1.77857	-0.00587177	0.0714926	0.0656208	0.0656208	0.199903	0.0511657	14.12	902183	48650	0.800097	0.199903
2008	6	SC Firm 6	1	US	0	SERV	4000	HCARE	1	0.188602	0.0637375	0	0	0.180149	2.95904	13.3092	0.015807	0.00878313	-0.291621	-0.00712501	0.0214555	0.0143305	0.0143305	0.188602	0.0637375	10.62	688622	46879	0.811398	0.188602
2009	6	SC Firm 6	1	US	0	SERV	4000	HCARE	1	0.214817	0.0575574	0	0	0.180299	3.73221	13.4483	0.0165142	0.000367804	-2.77553	0.0385081	0.0338333	0.0723414	0.0723414	0.214817	0.0575574	14.3067	935248	57118	0.785183	0.214817
2010	6	SC Firm 6	1	US	0	SERV	4000	HCARE	1	0.233347	0.0568137	0	0	0.198828	4.10723	13.5593	0.0239481	0.0121129	2.53192	0.0278375	0.0329179	0.0607554	0.0607554	0.233347	0.0568137	16.27	1076684	64855	0.766653	0.233347
2011	6	SC Firm 6	1	US	0	SERV	4000	HCARE	1	0.24843	0.057416	0	0	0.211215	4.32685	13.6979	0.033701	0.00762737	1.60145	0.0245569	0.0300972	0.054654	0.054654	0.24843	0.057416	17.69	1181497	71969	0.75157	0.24843
2012	6	SC Firm 6	1	US	0	SERV	4000	HCARE	1	0.306818	0.0603946	0	0	0.218791	5.08022	13.8901	0.0310161	0.00514211	2.32108	0.0895094	0.0353973	0.124907	0.124907	0.306818	0.0603946	23.23	1580871	101613	0.693182	0.306818
2013	6	SC Firm 6	1	US	0	SERV	4000	HCARE	1	0.329615	0.065963	0	0	0.162204	4.99696	13.9552	0.0265763	0.0394043	2.21931	0.0907176	0.129663	0.22038	0.22038	0.329615	0.065963	28.37	1985219	140199	0.670385	0.329615
2007	7	SC Firm 7	1	US	0	SERV	4000	HCARE	1	0.276561	0.0510602	0	0	0.204003	5.41637	12.5579	0.113664	0.129833	1.77857	-0.0287079	0.187977	0.159269	0.159269	0.276561	0.0510602	16.68	1144949	61607	0.723439	0.276561
2008	7	SC Firm 7	1	US	0	SERV	4000	HCARE	1	0.217659	0.095736	0	0	0.123634	2.27353	12.6247	0.0965809	0.0467204	-0.291621	-0.00288536	-0.0395001	-0.0423855	-0.0423855	0.217659	0.095736	8.75	574289	60801	0.782341	0.217659
2009	7	SC Firm 7	1	US	0	SERV	4000	HCARE	1	0.231404	0.0582591	0	0	0.14549	3.97198	12.6518	0.0702933	0.0219487	-2.77553	0.0602494	0.241428	0.301678	0.301678	0.231404	0.0582591	17.82	1328802	82204	0.768596	0.231404
2010	7	SC Firm 7	1	US	0	SERV	4000	HCARE	1	0.207983	0.0623146	0	0	0.236513	3.33763	12.8665	0.0643347	0.069215	2.53192	0.0356269	0.0638609	0.0994878	0.0994878	0.207983	0.0623146	19.54	1492661	99196	0.792017	0.207983
2011	7	SC Firm 7	1	US	0	SERV	4000	HCARE	1	0.244096	0.0781689	0	0	0.179837	3.12268	13.081	0.0831172	0.0356956	1.60145	0.0913142	0.0790141	0.170328	0.170328	0.244096	0.0781689	23.725	1868961	158483	0.755904	0.244096
2012	7	SC Firm 7	1	US	0	SERV	4000	HCARE	1	0.231379	0.0725533	0	0	0.185101	3.18909	13.2358	0.104707	0.00372173	2.32108	0.0218323	0.0841571	0.105989	0.105989	0.231379	0.0725533	27.75	2236955	174995	0.768621	0.231379
2013	7	SC Firm 7	1	US	0	SERV	4000	HCARE	1	0.238151	0.0412638	0	0	0.213965	5.77144	13.4003	0.0910212	0.0227651	2.21931	0.0278581	0.0708252	0.0986833	0.0986833	0.238151	0.0412638	57.14	4604513	198177	0.761849	0.238151
2014	7	SC Firm 7	1	US	0	SERV	4000	HCARE	1	0.238084	0.0498414	0	0	0.214001	4.77682	13.5432	0.0912199	0.00154284	2.3882	0.0374991	0.0540467	0.0915458	0.0915458	0.238084	0.0498414	55.91	4484262	235226	0.761916	0.238084
2012	8	SC Firm 8	1	US	1	MAN	1	OILGAS	1	0.118342	0.118586	0.0445157	0.0446152	0.223371	0.997943	14.9635	0.76062	0.0127393	2.32108	-0.0142485	0.043283	0.0290345	0.0290345	0.118342	0.118586	56.01	5032267	677047	0.881658	0.288597
2013	8	SC Firm 8	1	US	1	MAN	1	OILGAS	1	0.0954725	0.075176	0.0332668	0.0258171	0.22241	1.26999	15.0356	0.746406	0.00420561	2.21931	-0.0125986	0.00403874	-0.00855985	-0.00855985	0.0954725	0.075176	84.08	7358135	598119	0.904527	0.25956
2014	8	SC Firm 8	1	US	1	MAN	1	OILGAS	1	0.0914689	0.0548529	0.0127942	0.0074155	0.231923	1.66753	15.1292	0.77199	0.0030703	2.3882	0.00247627	0.00243922	0.00491549	0.00491549	0.0914689	0.0548529	67.42	10592694	614762	0.908531	0.26051
2004	9	SC Firm 9	1	US	0	SERV	4000	HCARE	1	0.212162	0.0854775	0	0	0.089013	2.48208	11.3336	0.0545635	0.0291927	3.78574	0.0489023	0.0271317	0.0760341	0.0760341	0.212162	0.0854775	3	174019	16265	0.787838	0.212162
2005	9	SC Firm 9	1	US	0	SERV	4000	HCARE	1	0.169313	0.0845938	0	0	0.112738	2.00148	11.3336	0.0860036	0.0138911	3.34522	-0.0163583	0.0495885	0.0332302	0.0332302	0.169313	0.0845938	2.55	160500	14832	0.830687	0.169313
2006	9	SC Firm 9	1	US	0	SERV	4000	HCARE	1	0.320116	0.124497	0.22759	0.0817163	0.110943	2.57128	11.3844	0.0773325	0.0259645	2.66663	0.225791	0.185528	0.411319	0.411319	0.320116	0.124497	5.04999	353980	50336	0.679884	0.119789
2007	9	SC Firm 9	1	US	0	SERV	4000	HCARE	1	0.262366	0.056649	0.145497	0.0279438	0.204801	4.63143	11.8958	0.087698	0.0711258	1.77857	-0.00523658	0.0897714	0.0845348	0.0845348	0.262366	0.056649	11.07	821821	49351	0.737634	0.136768
2008	9	SC Firm 9	1	US	0	SERV	4000	HCARE	1	0.19842	0.0520471	0.0885342	0.0210904	0.218998	3.81232	12.1254	0.0798021	0.0104073	-0.291621	-0.0233694	0.0819638	0.0585943	0.0585943	0.19842	0.0520471	10.5067	804139	44151	0.80158	0.120559
2009	9	SC Firm 9	1	US	0	SERV	4000	HCARE	1	0.118329	0.0244462	0	0	0.241897	4.95246	12.3425	0.0772306	0.0187932	-2.77553	-0.0448042	0.111619	0.0668147	0.0668147	0.118329	0.0244462	16.23	1308328	32025	0.881671	0.119533
2010	9	SC Firm 9	1	US	0	SERV	4000	HCARE	1	0.111925	0.0244462	0	0	0.234205	5.21129	12.621	0.1267	0.00178135	2.53192	0.0211785	0.0983126	0.119491	0.119491	0.111925	0.0244462	21.59	1799591	39499	0.888075	0.12827
2004	10	SC Firm 10	1	US	0	SERV	4000	HCARE	1	0.210267	0.0564744	0.00443714	0.00100094	0.241785	3.72322	13.2162	0.121792	0.0396354	3.78574	-0.000427818	-0.166752	-0.16718	-0.16718	0.210267	0.0564744	13.6475	1806492	108127	0.789733	0.223179
2005	10	SC Firm 10	1	US	0	SERV	4000	HCARE	1	0.235675	0.0480623	0.00146704	0.000240511	0.27927	4.90353	13.3662	0.133891	0.0176474	3.34522	0.0153115	-0.208	-0.192689	-0.192689	0.235675	0.0480623	17.995	2290404	115640	0.764325	0.246833
2006	10	SC Firm 10	1	US	0	SERV	4000	HCARE	1	0.254745	0.0545328	0.0167987	0.00287471	0.276884	4.6714	13.5132	0.178047	0.00453517	2.66663	0.0480824	-0.0923922	-0.0443098	-0.0443098	0.254745	0.0545328	19.825	2471385	142545	0.745255	0.254797
2010	11	SC Firm 11	1	US	0	SERV	4000	HCARE	1	0.26731	0.125057	0	0	0.397801	2.1375	13.6871	0.153292	0.129833	2.53192	-0.250069	0.051291	-0.198778	-0.198778	0.26731	0.125057	20.11	1296639	185331	0.73269	0.26731
2011	11	SC Firm 11	1	US	0	SERV	4000	HCARE	1	0.240494	0.124594	0	0	0.155729	1.93021	13.1479	0.14884	0.129833	1.60145	0.00703777	0.0371086	0.0441464	0.0441464	0.240494	0.124594	20.17	1341398	190918	0.759506	0.240494
2012	11	SC Firm 11	1	US	0	SERV	4000	HCARE	1	0.200084	0.109982	0	0	0.202725	1.81924	13.2737	0.209218	0.0165602	2.32108	-0.0208931	0.0373728	0.0164797	0.0164797	0.200084	0.109982	20.49	1398904	172867	0.799916	0.200084
2013	11	SC Firm 11	1	US	0	SERV	4000	HCARE	1	0.187296	0.0963183	0	0	0.0603497	1.94456	13.1451	0.188772	0.0624287	2.21931	0.0138958	0.0178961	0.0317918	0.0317918	0.187296	0.0963183	25.14	1751853	186720	0.812704	0.187296
2014	11	SC Firm 11	1	US	0	SERV	4000	HCARE	1	0.17728	0.0781602	0	0	0.121456	2.26816	13.2981	0.17436	0.046453	2.3882	0.00426243	0.0188297	0.0230922	0.0230922	0.17728	0.0781602	31.68	2256474	191320	0.82272	0.17728
2010	12	SC Firm 12	1	US	1	MAN	9000	TECH	1	0.174807	0.104571	0	0	0.16933	1.67166	13.3136	0.0931378	0.0968342	2.53192	-0.0308842	-0.101236	-0.13212	-0.13212	0.174807	0.104571	5.46	1088904	127165	0.825193	0.176887
2011	12	SC Firm 12	1	US	1	MAN	9000	TECH	1	0.13474	0.0868472	0	0	0.0791309	1.55146	13.1744	0.0975205	0.0617126	1.60145	-0.0424604	-0.0477876	-0.090248	-0.090248	0.13474	0.0868472	7.3	1016687	96694	0.86526	0.136903
2012	12	SC Firm 12	1	US	1	MAN	9000	TECH	1	0.133137	0.081547	0	0	0.0456231	1.63265	13.0908	0.102924	0.028342	2.32108	0.000421368	0.0422878	0.0427092	0.0427092	0.133137	0.081547	10.18	1092510	97001	0.866863	0.135267
2013	12	SC Firm 12	1	US	1	MAN	9000	TECH	1	0.115061	0.05068	0	0	0.0922066	2.27034	13.0914	0.0840317	0.0335183	2.21931	-0.00167276	0.0185412	0.0168684	0.0168684	0.115061	0.05068	19.6	1790952	95611	0.884939	0.116859
2014	12	SC Firm 12	1	US	1	MAN	9000	TECH	1	0.136029	0.040607	0	0	0.14943	3.34989	13.2585	0.0716985	0.0596786	2.3882	0.0313826	-0.043652	-0.0122693	-0.0122693	0.136029	0.040607	26.35	2936371	124284	0.863971	0.137256
2008	13	SC Firm 13	1	US	0	SERV	4000	HCARE	1	0.232306	0.103213	0.148574	0.0622387	-0.000121804	2.25074	12.6972	0.187932	0.0293446	-0.291621	-0.250069	-0.00164347	-0.251713	-0.251713	0.232306	0.103213	9.41	1143417	131598	0.767694	0.0983431
2009	13	SC Firm 13	1	US	0	SERV	4000	HCARE	1	0.199736	0.0749457	0.110087	0.0386054	0.00182506	2.66508	12.0911	0.187946	0.0201315	-2.77553	-0.0554965	0.0336579	-0.0218386	-0.0218386	0.199736	0.0749457	12.28	1271131	102984	0.800264	0.100739
2010	13	SC Firm 13	1	US	0	SERV	4000	HCARE	1	0.133562	0.0480628	0	0	-0.0340192	2.77891	12.1369	0.210013	0.0348952	2.53192	-0.0940528	0.0551268	-0.038926	-0.038926	0.133562	0.0480628	17.36	1196883	60430	0.866438	0.133562
2004	14	SC Firm 14	1	US	1	MAN	9000	TECH	1	0.180899	0.0558611	0.0224106	0.006104	0.311966	3.23837	17.348	0.327524	0.0264673	3.78574	0.0185697	-0.0242195	-0.00564983	-0.00564983	0.180899	0.0558611	23.39	147195620	8709000	0.819101	0.179881
2005	14	SC Firm 14	1	US	1	MAN	9000	TECH	1	0.236557	0.071805	0.0615459	0.0161098	0.345159	3.29443	17.4746	0.354162	0.0281593	3.34522	0.0562984	-0.00146955	0.0548288	0.0548288	0.236557	0.071805	24.96	147738240	11429000	0.763443	0.201039
2006	14	SC Firm 14	1	US	1	MAN	9000	TECH	1	0.23468	0.0886018	0.0519401	0.0170722	0.229863	2.6487	17.3817	0.363918	0.0862029	2.66663	-0.00161264	0.0198065	0.0181938	0.0181938	0.23468	0.0886018	20.25	116761500	11351000	0.76532	0.19823
2007	14	SC Firm 14	1	US	1	MAN	9000	TECH	1	0.224219	0.0741998	0.0468484	0.0134464	0.243122	3.02183	17.4618	0.304002	0.0202075	1.77857	0.0202512	0.0771235	0.0973747	0.0973747	0.224219	0.0741998	26.66	155689680	12478000	0.775781	0.193474
2008	14	SC Firm 14	1	US	1	MAN	9000	TECH	1	0.215565	0.121227	0.0314832	0.0160562	0.282929	1.7782	17.4421	0.348193	0.0244419	-0.291621	-0.0316611	0.0144635	-0.0171977	-0.0171977	0.215565	0.121227	14.66	78869160	10880000	0.784435	0.190977
2009	14	SC Firm 14	1	US	1	MAN	9000	TECH	1	0.204087	0.0880127	0.0499326	0.0193968	0.207063	2.31884	17.3745	0.324418	0.0562573	-2.77553	-0.000828703	0.0543554	0.0535267	0.0535267	0.204087	0.0880127	20.4	112282590	10836000	0.795913	0.172709
2010	14	SC Firm 14	1	US	1	MAN	9000	TECH	1	0.203051	0.100486	0.040308	0.0180824	0.320103	2.02069	17.5911	0.283275	0.0953092	2.53192	0.0315576	0.0236761	0.0552338	0.0552338	0.203051	0.100486	21.03	114849240	12830000	0.796949	0.184234
2008	15	SC Firm 15	1	US	0	SERV	4000	HCARE	1	0.140957	0.0400983	0	0	0.227811	3.51527	13.6819	0.0793565	0.00569663	-0.291621	0.0383379	0.117845	0.156183	0.156183	0.140957	0.0400983	126.99	4975849	207858	0.859043	0.140957
2009	15	SC Firm 15	1	US	0	SERV	4000	HCARE	1	0.113168	0.0244462	0	0	0.227684	6.56841	13.8664	0.069459	0.00157326	-2.77553	-0.00168978	0.12392	0.12223	0.12223	0.113168	0.0244462	303.43	11682055	204800	0.886832	0.150522
2010	15	SC Firm 15	1	US	0	SERV	4000	HCARE	1	0.114876	0.0266574	0	0	0.249163	4.30935	14.1612	0.0668507	0.016757	2.53192	0.0292001	0.12705	0.15625	0.15625	0.114876	0.0266574	257.75	10026475	274600	0.885124	0.147674
2011	15	SC Firm 15	1	US	0	SERV	4000	HCARE	1	0.104992	0.0244462	0	0	0.24201	6.04547	14.3793	0.0643792	0.00384196	1.60145	0.0153439	0.144527	0.159871	0.159871	0.104992	0.0244462	463.01	18196293	321600	0.895008	0.1363
2012	15	SC Firm 15	1	US	0	SERV	4000	HCARE	1	0.0991328	0.0244462	0	0	0.230563	4.95548	14.5943	0.0595684	0.00742859	2.32108	0.0199054	0.119186	0.139091	0.139091	0.0991328	0.0244462	490.37	19712874	402400	0.900867	0.118028
2013	15	SC Firm 15	1	US	0	SERV	4000	HCARE	1	0.0973091	0.0255309	0	0	0.232843	3.81142	14.6331	0.0784497	0.000365588	2.21931	-0.00455662	0.0666025	0.0620459	0.0620459	0.0973091	0.0255309	384.08	14671856	384400	0.902691	0.113637
2014	15	SC Firm 15	1	US	0	SERV	4000	HCARE	1	0.130878	0.0260698	0	0	0.156387	5.02031	14.5724	0.0978431	0.0553027	2.3882	0.033793	0.0926908	0.126484	0.126484	0.130878	0.0260698	528.94	19359204	518200	0.869122	0.146487
2006	16	SC Firm 16	1	US	1	MAN	2000	IND	1	0.316854	0.0667685	0.205059	0.0382679	0.194032	4.74556	11.8722	0.28884	0.0220588	2.66663	-0.250069	0.410394	0.160325	0.160325	0.316854	0.0667685	24	1029639	73666	0.683146	0.141631
2007	16	SC Firm 16	1	US	1	MAN	2000	IND	1	0.223822	0.0627828	0.132503	0.0342669	0.206011	3.56502	12.1478	0.365975	0.011731	1.77857	-0.0559355	0.0594825	0.003547	0.003547	0.223822	0.0627828	19.99	879807	58937	0.776178	0.121232
2008	16	SC Firm 16	1	US	1	MAN	2000	IND	1	0.230351	0.108529	0.139556	0.06189	0.2157	2.12249	12.3418	0.365535	0.00156598	-0.291621	0.0421847	9.57799e-05	0.0422805	0.0422805	0.230351	0.108529	13.18	592651	72150	0.769649	0.114767
2009	16	SC Firm 16	1	US	1	MAN	2000	IND	1	0.17157	0.0650566	0.0848292	0.0302026	0.0817564	2.63725	12.1329	0.356494	0.10001	-2.77553	-0.0592094	0.0400146	-0.0191948	-0.0191948	0.17157	0.0650566	16.73	770859	53639	0.82843	0.102992
2010	16	SC Firm 16	1	US	1	MAN	2000	IND	1	0.279549	0.076754	0.0696121	0.0157777	0.230947	3.64214	12.6091	0.273128	0.111728	2.53192	0.158154	0.0121013	0.170255	0.170255	0.279549	0.076754	31.62	1485778	123520	0.720451	0.229571
2011	16	SC Firm 16	1	US	1	MAN	2000	IND	1	0.256273	0.0881191	0.051179	0.0149015	0.31852	2.90826	13.07	0.255211	0.0662368	1.60145	0.0531595	0.0274332	0.0805927	0.0805927	0.256273	0.0881191	33.87	1612758	155848	0.743727	0.230892
2012	16	SC Firm 16	1	US	1	MAN	2000	IND	1	0.155745	0.0391485	0.0232057	0.00521962	0.26398	3.9783	13.2402	0.235135	0.0347423	2.32108	-0.0182904	0.21396	0.19567	0.19567	0.155745	0.0391485	66.65	3423094	139469	0.844255	0.150319
2013	16	SC Firm 16	1	US	1	MAN	2000	IND	1	0.104985	0.0268996	0.0165278	0.00394481	0.239835	3.90286	13.3817	0.237694	0.0189735	2.21931	-0.0264385	0.0358033	0.00936473	0.00936473	0.104985	0.0268996	77.61	4030363	111412	0.895015	0.110519
2014	16	SC Firm 16	1	US	1	MAN	2000	IND	1	0.117056	0.0348665	0.0322518	0.00899962	0.258283	3.35727	13.5539	0.227174	0.0147931	2.3882	0.0250478	-0.066979	-0.0419312	-0.0419312	0.117056	0.0348665	74.92	3923537	141742	0.882944	0.106282
2004	17	SC Firm 17	1	US	1	MAN	9000	TECH	1	0.0847257	0.0244462	0.0145188	0.00252529	0.326327	5.411	11.5744	0.0809982	0.0389765	3.78574	0.0196512	0.0356337	0.0552849	0.0552849	0.0847257	0.0244462	17.25	814478	12956	0.915274	0.0775952
2005	17	SC Firm 17	1	US	1	MAN	9000	TECH	1	0.0887116	0.0244462	0.00365523	0.000700615	0.304505	4.85715	11.8772	0.0777133	0.0170448	3.34522	0.0303365	0.0636287	0.0939651	0.0939651	0.0887116	0.0244462	21.37	1058327	19689	0.911288	0.0853684
2006	17	SC Firm 17	1	US	1	MAN	9000	TECH	1	0.115974	0.0244462	0.000584566	0.000110857	0.257721	4.77977	12.1067	0.0657655	0.0306222	2.66663	0.0476471	-0.00223834	0.0454088	0.0454088	0.115974	0.0244462	27.25	1343919	33419	0.884026	0.115457
2007	17	SC Firm 17	1	US	1	MAN	9000	TECH	1	0.193474	0.0617415	0	0	0.275455	3.13361	12.3045	0.0670959	0.012357	1.77857	0.0981025	-0.0618506	0.0362519	0.0362519	0.193474	0.0617415	21.17	1030251	67795	0.806526	0.193474
2008	17	SC Firm 17	1	US	1	MAN	9000	TECH	1	0.223761	0.0761493	0	0	0.343523	2.93845	12.3947	0.0588064	0.0406317	-0.291621	0.0132437	-0.208	-0.194757	-0.194757	0.223761	0.0761493	20.04	874239	72060	0.776239	0.223761
2009	17	SC Firm 17	1	US	1	MAN	9000	TECH	1	0.187992	0.0795919	0	0	0.293808	2.36195	12.4113	0.0322849	0.0324462	-2.77553	0.0139347	0.0467752	0.06071	0.06071	0.187992	0.0795919	20.35	900022	77829	0.812008	0.187992
2010	17	SC Firm 17	1	US	1	MAN	9000	TECH	1	0.160686	0.06162	0	0	0.228713	2.60769	12.4506	0.0254721	0.0401139	2.53192	0.0145619	0.0589366	0.0734985	0.0734985	0.160686	0.06162	28.95	1303331	85585	0.839314	0.189399
2011	17	SC Firm 17	1	US	1	MAN	9000	TECH	1	0.130064	0.0605352	0	0	0.239117	2.14857	12.7073	0.0221724	0.00515348	1.60145	-0.0013683	0.0429826	0.0416143	0.0416143	0.130064	0.0605352	28.14	1314393	84694	0.869936	0.148649
2004	18	SC Firm 18	1	US	1	MAN	9000	TECH	1	0.14386	0.0641228	0.062571	0.0264955	0.0453496	2.2435	14.1052	0.0393748	0.00138384	3.78574	0.0226185	0.410394	0.433013	0.433013	0.14386	0.0641228	27.19	14696902	1006977	0.85614	0.0867145
2005	18	SC Firm 18	1	US	1	MAN	9000	TECH	1	0.13385	0.0795643	0.053412	0.0305971	0.0721435	1.68229	14.5401	0.0390885	0.0168061	3.34522	0.0108021	0.192767	0.20357	0.20357	0.13385	0.0795643	22.3	12671819	1095377	0.86615	0.0849769
2006	18	SC Firm 18	1	US	1	MAN	9000	TECH	1	0.170093	0.104142	0.0613879	0.0357692	0.0631127	1.63327	14.65	0.0474907	0.0110336	2.66663	0.021434	0.0291346	0.0505685	0.0505685	0.170093	0.104142	18.94	10781292	1253311	0.829907	0.115815
2007	18	SC Firm 18	1	US	1	MAN	9000	TECH	1	0.222434	0.0810814	0.069437	0.022498	0.0865108	2.74334	14.8579	0.0583579	0.0133539	1.77857	0.0404094	0.075503	0.115912	0.115912	0.222434	0.0810814	33.2	17357458	1531546	0.777566	0.164413
2008	18	SC Firm 18	1	US	1	MAN	9000	TECH	1	0.178917	0.122361	0	0	0.121251	1.4622	15.0887	0.0607225	0.0279271	-0.291621	-0.0341726	0.089055	0.0548825	0.0548825	0.178917	0.122361	17.51	9223428	1285936	0.821083	0.178917
2009	18	SC Firm 18	1	US	1	MAN	9000	TECH	1	0.232947	0.113204	0	0	0.0870671	2.05776	15.0142	0.060031	0.0215152	-2.77553	0.0635276	0.0331219	0.0966495	0.0966495	0.232947	0.113204	26.67	13850824	1768127	0.767053	0.232947
2010	18	SC Firm 18	1	US	1	MAN	9000	TECH	1	0.219613	0.0874858	0	0	0.11101	2.51027	15.2249	0.0583242	0.0177855	2.53192	0.0108084	0.077691	0.0884994	0.0884994	0.219613	0.0874858	36.92	19396956	1859651	0.780387	0.219613
2011	18	SC Firm 18	1	US	1	MAN	9000	TECH	1	0.289933	0.212238	0.123517	0.0850745	0.0802158	1.36607	15.3081	0.0599551	0.0188763	1.60145	0.103666	0.0345606	0.138227	0.138227	0.289933	0.212238	20.41	10744008	2894638	0.710067	0.189868
2012	18	SC Firm 18	1	US	1	MAN	9000	TECH	1	0.288148	0.220761	0.124928	0.0908411	0.0553188	1.30525	15.2892	0.0825765	0.020985	2.32108	-0.00625889	-0.0153766	-0.0216355	-0.0216355	0.288148	0.220761	19.67	10000228	2833100	0.711852	0.186522
2013	18	SC Firm 18	1	US	1	MAN	9000	TECH	1	0.292834	0.212937	0.120376	0.0820715	0.0770676	1.37521	15.3565	0.0854445	0.0158234	2.21931	0.0184679	0.00223707	0.020705	0.020705	0.292834	0.212937	22.57	11176664	3023800	0.707166	0.196058
2004	19	SC Firm 19	1	US	1	MAN	9000	TECH	1	0.257582	0.0857488	0	0	0.0822592	3.00391	14.2191	0.106254	0.0167763	3.78574	0.0736253	0.0475557	0.121181	0.121181	0.257582	0.0857488	37.4499	9719762	911629	0.742418	0.257582
2005	19	SC Firm 19	1	US	1	MAN	9000	TECH	1	0.233612	0.0990229	0	0	0.147607	2.35917	14.5488	0.0955107	0.0467204	3.34522	0.00799485	0.0636294	0.0716242	0.0716242	0.233612	0.0990229	39.6609	8588536	943933	0.766388	0.233612
2006	19	SC Firm 19	1	US	1	MAN	9000	TECH	1	0.220267	0.108538	0	0	0.0801351	2.0294	14.5434	0.0864116	0.0475248	2.66663	0.0139834	0.0406951	0.0546785	0.0546785	0.220267	0.108538	39.9986	8278416	1007920	0.779733	0.220267
2007	19	SC Firm 19	1	US	1	MAN	9000	TECH	1	0.232133	0.0926084	0	0	0.148875	2.5066	14.8203	0.0826778	0.043986	1.77857	0.0141215	-0.0975483	-0.0834268	-0.0834268	0.232133	0.0926084	38.7202	10515452	1073207	0.767867	0.232133
2006	20	SC Firm 20	1	US	1	MAN	9000	TECH	1	0.0846403	0.0244462	0	0	0.22295	7.29543	16.1768	0.129659	0.00918038	2.66663	0.0311613	0.246216	0.277378	0.277378	0.0846403	0.0244462	230.463	142286939	1393090	0.91536	0.0775989
2007	20	SC Firm 20	1	US	1	MAN	9000	TECH	1	0.104442	0.0244462	0	0	0.238806	7.29543	16.6246	0.159429	0.00601884	1.77857	0.0494572	0.0555719	0.105029	0.105029	0.104442	0.0244462	346.075	216624898	2646127	0.895558	0.104442
2008	20	SC Firm 20	1	US	1	MAN	9000	TECH	1	0.110685	0.0349978	0	0	0.255729	3.16263	16.8972	0.164754	0.00571692	-0.291621	0.0273887	0.0420189	0.0694076	0.0694076	0.110685	0.0349978	153.974	96952970	3516198	0.889315	0.111079
2009	20	SC Firm 20	1	US	1	MAN	9000	TECH	1	0.110936	0.0244462	0	0	0.242444	4.97582	16.9789	0.11963	0.00248185	-2.77553	0.0241095	0.030432	0.0545415	0.0545415	0.110936	0.0244462	310.291	197012316	4492554	0.889064	0.110936
2010	20	SC Firm 20	1	US	1	MAN	9000	TECH	1	0.200688	0.0573465	0.0697099	0.0178325	0.203315	3.49957	17.1938	0.13412	0.0182517	2.53192	0.123031	0.0423649	0.165396	0.165396	0.200688	0.0573465	297.273	190843426	11610000	0.799312	0.140793
2011	20	SC Firm 20	1	US	1	MAN	9000	TECH	1	0.194863	0.0631363	0.067118	0.0196399	0.193995	3.08639	17.4506	0.13232	0.007609	1.60145	0.0348885	0.0338138	0.0687023	0.0687023	0.194863	0.0631363	323.263	209849527	14142000	0.805137	0.140891
2012	20	SC Firm 20	1	US	1	MAN	9000	TECH	1	0.215474	0.0796865	0.0699788	0.0231715	0.176614	2.70402	17.645	0.126378	0.0149877	2.32108	0.0647029	0.0471012	0.111804	0.111804	0.215474	0.0796865	354.033	233420372	20211000	0.784526	0.1764
2013	20	SC Firm 20	1	US	1	MAN	9000	TECH	1	0.195312	0.0544274	0.0555021	0.0137442	0.173053	3.58848	17.8322	0.148972	0.00609618	2.21931	0.0130995	0.0247836	0.0378832	0.0378832	0.195312	0.0544274	560.899	376370608	21664000	0.804688	0.165579
2014	20	SC Firm 20	1	US	1	MAN	9000	TECH	1	0.188574	0.0637945	0.0471513	0.0143018	0.16466	2.95597	18.0052	0.183115	0.00671031	2.3882	0.0224725	0.0212458	0.0437183	0.0437183	0.188574	0.0637945	530.66	360940074	24595000	0.811426	0.163533
2004	21	SC Firm 21	1	US	1	MAN	3000	CGOODS	1	0.160341	0.0718282	0.00461458	0.00187521	0.220327	2.23229	13.908	0.22373	0.0285906	3.78574	0.00220372	-0.00650175	-0.00429803	-0.00429803	0.160341	0.0718282	41.0413	1477061	114305	0.839659	0.172994
2005	21	SC Firm 21	1	US	1	MAN	3000	CGOODS	1	0.183703	0.0837295	0.0120797	0.00494047	0.198591	2.19401	13.8434	0.210791	0.013479	3.34522	0.0273945	-0.0829684	-0.0555739	-0.0555739	0.183703	0.0837295	35.4695	1470090	134338	0.816297	0.186322
2006	21	SC Firm 21	1	US	1	MAN	3000	CGOODS	1	0.19941	0.0895826	0.0208722	0.00835088	0.223142	2.22599	13.7371	0.283988	0.0130923	2.66663	-0.0144963	-0.119974	-0.13447	-0.13447	0.19941	0.0895826	42.4198	1272739	125234	0.80059	0.195665
2007	21	SC Firm 21	1	US	1	MAN	3000	CGOODS	1	0.254792	0.105857	0.0969566	0.0358445	0.20758	2.40693	13.7598	0.325129	0.00384208	1.77857	0.0455441	-0.114906	-0.0693621	-0.0693621	0.254792	0.105857	38.0065	1288050	152492	0.745208	0.177615
2008	21	SC Firm 21	1	US	1	MAN	3000	CGOODS	1	0.304311	0.155218	0.141776	0.0648876	0.187993	1.96054	13.7962	0.345215	0.0164395	-0.291621	0.0111577	-0.169156	-0.157998	-0.157998	0.304311	0.155218	32.8368	861534	158296	0.695689	0.194506
2009	21	SC Firm 21	1	US	1	MAN	3000	CGOODS	1	0.183152	0.0686581	0	0	0.302036	2.6676	13.8657	0.342842	0.0820738	-2.77553	-0.134404	-0.0239347	-0.158339	-0.158339	0.183152	0.0686581	47.5608	1238450	91298	0.816848	0.192435
2010	21	SC Firm 21	1	US	1	MAN	3000	CGOODS	1	0.165556	0.0606777	0.00407032	0.00132889	0.332037	2.72846	13.8706	0.283223	0.0266386	2.53192	0.00987803	0.00109131	0.0109693	0.0109693	0.165556	0.0606777	54.76	1503020	97091	0.834444	0.169741
2011	21	SC Firm 21	1	US	1	MAN	3000	CGOODS	1	0.144356	0.0511574	0	0	0.263835	2.82179	13.9016	0.297838	0.0457312	1.60145	-0.011717	-0.0445965	-0.0563135	-0.0563135	0.144356	0.0511574	66.3821	1665603	89802	0.855644	0.168063
2012	21	SC Firm 21	1	US	1	MAN	3000	CGOODS	1	0.152787	0.0509418	0	0	0.236507	2.99925	13.8044	0.269734	0.0208511	2.32108	0.0212354	-0.0165447	0.00469065	0.00469065	0.152787	0.0509418	66.2385	1943097	104298	0.847213	0.173399
2013	21	SC Firm 21	1	US	1	MAN	3000	CGOODS	1	0.162055	0.0450237	0	0	0.280721	3.59931	13.8292	0.271103	0.0293153	2.21931	-0.00617778	0.0160864	0.00990864	0.00990864	0.162055	0.0450237	84.3897	2130977	100468	0.837945	0.19153
2014	21	SC Firm 21	1	US	1	MAN	3000	CGOODS	1	0.142931	0.0338966	0	0	0.272731	4.21668	13.8558	0.264119	0.00530399	2.3882	-0.014387	-0.000225483	-0.0146125	-0.0146125	0.142931	0.0338966	89.6455	2601619	91280	0.857069	0.172295
2004	22	SC Firm 22	1	US	1	MAN	9000	TECH	1	0.279647	0.0600844	0	0	0.194032	4.65423	13.8317	0.0902345	0.0330801	3.78574	0.0414016	0.0291556	0.0705571	0.0705571	0.279647	0.0600844	20.7	7736811	494578	0.720353	0.279647
2005	22	SC Firm 22	1	US	1	MAN	9000	TECH	1	0.310833	0.0785967	0.00306381	0.000580891	0.192355	3.95478	13.9322	0.0908242	0.000405881	3.34522	0.040231	-0.0170291	0.0232019	0.0232019	0.310833	0.0785967	18.53	6660034	568108	0.689167	0.308715
2006	22	SC Firm 22	1	US	1	MAN	9000	TECH	1	0.279904	0.0810359	0	0	0.148122	3.45408	14.0667	0.0798667	0.0293134	2.66663	0.0255192	0.0544433	0.0799625	0.0799625	0.279904	0.0810359	19.68	7088756	625099	0.720096	0.279904
2004	23	SC Firm 23	1	US	1	MAN	3000	CGOODS	1	0.292097	0.169441	0.197624	0.108555	0.144928	1.72389	12.9593	0.245353	0.00507834	3.78574	0.191002	0.0329027	0.223905	0.223905	0.292097	0.169441	2.50875	412748	84204	0.707903	0.117742
2005	23	SC Firm 23	1	US	1	MAN	3000	CGOODS	1	0.223487	0.0993799	0.122144	0.0506443	0.139992	2.24882	13.2129	0.221239	0.000431165	3.34522	0.0318643	0.241822	0.273687	0.273687	0.223487	0.0993799	4.3275	889982	98206	0.776513	0.115444
2006	23	SC Firm 23	1	US	1	MAN	3000	CGOODS	1	0.285822	0.116326	0.199499	0.0757627	0.157683	2.45708	13.579	0.225185	0.0114927	2.66663	0.111807	0.0308937	0.142701	0.142701	0.285822	0.116326	5.7475	1225363	161305	0.714178	0.111111
2007	24	SC Firm 24	1	US	0	SERV	5000	CSERV	1	0.282159	0.13094	0	0	0.174679	2.15488	12.9124	0.0901701	0.0905227	1.77857	-0.250069	0.410394	0.160325	0.160325	0.282159	0.13094	8.99	240502	36236	0.717841	0.282159
2008	24	SC Firm 24	1	US	0	SERV	5000	CSERV	1	0.249388	0.118411	0	0	0.271218	2.10612	13.0861	0.090417	0.0680512	-0.291621	0.0116269	0.000393688	0.0120206	0.0120206	0.249388	0.118411	10.56	282975	38008	0.750612	0.249388
2009	24	SC Firm 24	1	US	0	SERV	5000	CSERV	1	0.279027	0.0729637	0	0	0.234705	3.82418	13.2077	0.0995289	0.0218269	-2.77553	0.0944142	0.0345493	0.128963	0.128963	0.279027	0.0729637	26.8	729877	57446	0.720973	0.279027
2010	24	SC Firm 24	1	US	0	SERV	5000	CSERV	1	0.245297	0.079907	0	0	0.197846	3.06978	13.3379	0.145751	0.0267209	2.53192	0.00820092	0.0336663	0.0418672	0.0418672	0.245297	0.079907	24.91	684344	59433	0.754703	0.255004
2011	24	SC Firm 24	1	US	0	SERV	5000	CSERV	1	0.251138	0.130675	0	0	0.172173	1.92186	13.4322	0.149725	0.0212768	1.60145	0.0495703	0.0396535	0.0892238	0.0892238	0.251138	0.130675	17.66	492618	74049	0.748862	0.270541
2012	24	SC Firm 24	1	US	0	SERV	5000	CSERV	1	0.301335	0.0678681	0	0	0.254192	4.44001	13.6089	0.137495	0.0577003	2.32108	0.0881754	-0.0724322	0.0157432	0.0157432	0.301335	0.0678681	52.83	1437723	104680	0.698665	0.324842
2013	24	SC Firm 24	1	US	0	SERV	5000	CSERV	1	0.258798	0.0377283	0	0	0.320536	6.85952	13.8158	0.153523	0.0479759	2.21931	0.0151062	-0.00398548	0.0111207	0.0111207	0.258798	0.0377283	102.89	2835398	111169	0.741202	0.279892
2014	24	SC Firm 24	1	US	0	SERV	5000	CSERV	1	0.305697	0.0775253	0	0	0.240722	3.94319	13.8618	0.253043	0.0583178	2.3882	0.0804135	-0.0793354	0.0010781	0.0010781	0.305697	0.0775253	66.31	1794966	150850	0.694303	0.327093
2004	25	SC Firm 25	1	US	1	MAN	9000	TECH	1	0.176482	0.06761	0.00119931	0.000406127	0.146055	2.6103	12.278	0.046851	0.00858416	3.78574	0.0302234	-0.0233428	0.00688054	0.00688054	0.176482	0.06761	5.97	706388	51222	0.823518	0.175493
2005	25	SC Firm 25	1	US	1	MAN	9000	TECH	1	0.248722	0.108764	0.000715172	0.000263747	0.178081	2.28679	12.4147	0.0520852	0.0176186	3.34522	0.0613684	-0.191128	-0.12976	-0.12976	0.248722	0.108764	5.12	557205	68000	0.751278	0.248184
2006	25	SC Firm 25	1	US	1	MAN	9000	TECH	1	0.244019	0.084686	0	0	0.154605	2.88146	12.5737	0.0503346	0.0151709	2.66663	0.028073	0.0423128	0.0703858	0.0703858	0.244019	0.084686	7.52	830512	76840	0.755981	0.246919
2007	25	SC Firm 25	1	US	1	MAN	9000	TECH	1	0.316407	0.115793	0	0	0.20893	2.73252	12.729	0.0898955	0.0326197	1.77857	0.033553	-0.208	-0.174447	-0.174447	0.316407	0.115793	6.59	656362	85955	0.683593	0.316407
2004	26	SC Firm 26	1	US	1	MAN	9000	TECH	1	0.126593	0.0244462	0	0	0.191049	6.74792	14.1806	0.369563	0.0156505	3.78574	0.0403332	-0.00143442	0.0388988	0.0388988	0.126593	0.0244462	42.39	16880821	322745	0.873407	0.171465
2005	26	SC Firm 26	1	US	1	MAN	9000	TECH	1	0.12236	0.0285866	0	0	0.243622	4.28033	14.3294	0.329569	0.0367019	3.34522	0.016886	-0.00942993	0.00745603	0.00745603	0.12236	0.0285866	36.24	12723142	374415	0.87764	0.122366
2006	26	SC Firm 26	1	US	1	MAN	9000	TECH	1	0.155497	0.0472989	0	0	0.186244	3.28755	14.4344	0.354319	0.0414802	2.66663	0.0415735	-0.0440391	-0.00246551	-0.00246551	0.155497	0.0472989	30.62	10293612	511048	0.844503	0.155497
2007	26	SC Firm 26	1	US	1	MAN	9000	TECH	1	0.131655	0.042456	0	0	0.128928	3.10097	14.5132	0.396828	0.0419717	1.77857	-0.0100361	0.0749551	0.0649191	0.0649191	0.131655	0.042456	26.48	10709676	474850	0.868345	0.131655
2008	26	SC Firm 26	1	US	1	MAN	9000	TECH	1	0.151165	0.0768739	0	0	0.162227	1.9664	14.5347	0.400497	0.0127557	-0.291621	0.0231176	-0.0102419	0.0128757	0.0128757	0.151165	0.0768739	11.42	6731613	560579	0.848835	0.151165
2009	26	SC Firm 26	1	US	1	MAN	9000	TECH	1	0.136297	0.0784667	0	0	0.0991821	1.73701	14.3139	0.443268	0.0607837	-2.77553	-0.0456042	-0.0537171	-0.0993213	-0.0993213	0.136297	0.0784667	20.32	4933026	420037	0.863703	0.158126
2010	26	SC Firm 26	1	US	1	MAN	9000	TECH	1	0.285109	0.159349	0.107547	0.0541735	0.18	1.78921	14.5075	0.380331	0.0701891	2.53192	0.16449	0.0125652	0.177055	0.177055	0.285109	0.159349	23.62	5237764	992843	0.714891	0.238165
2011	26	SC Firm 26	1	US	1	MAN	9000	TECH	1	0.236188	0.104655	0.100183	0.0403861	0.250919	2.25683	14.7207	0.371016	0.0430411	1.60145	-0.0452507	0.0127161	-0.0325347	-0.0325347	0.236188	0.104655	26.04	7128298	833210	0.763812	0.203225
2012	26	SC Firm 26	1	US	1	MAN	9000	TECH	1	0.267839	0.11769	0.101478	0.0395519	0.209288	2.2758	14.6924	0.362126	0.0278082	2.32108	0.044933	0.00364318	0.0485761	0.0485761	0.267839	0.11769	29.4	7505648	1001167	0.732161	0.238254
2004	27	SC Firm 27	1	US	1	MAN	2000	IND	1	0.173068	0.115788	0.0172782	0.0108812	0.160487	1.4947	13.311	0.0552838	0.00126386	3.78574	0.0030877	0.02048	0.0235677	0.0235677	0.173068	0.115788	7.78	614225	80433	0.826932	0.181695
2005	27	SC Firm 27	1	US	1	MAN	2000	IND	1	0.211627	0.128553	0.0119754	0.00661665	0.142823	1.64623	13.3809	0.0582832	0.0122263	3.34522	0.0611622	0.0139441	0.0751063	0.0751063	0.211627	0.128553	9.1725	766884	113128	0.788373	0.23103
2006	27	SC Firm 27	1	US	1	MAN	2000	IND	1	0.248268	0.197805	0.0088154	0.0065965	0.0346499	1.25511	13.2769	0.0598549	0.0731928	2.66663	0.0457116	0.00812174	0.0538334	0.0538334	0.248268	0.197805	7.695	562324	138658	0.751732	0.26834
2007	27	SC Firm 27	1	US	1	MAN	2000	IND	1	0.251835	0.128136	0.00481671	0.00210878	0.0866716	1.96538	13.276	0.060817	0.035769	1.77857	0.00618994	0.0345	0.0406899	0.0406899	0.251835	0.128136	9.6525	967236	142152	0.748165	0.271089
2009	28	SC Firm 28	1	US	0	SERV	4000	HCARE	1	0.260336	0.134794	0.0388025	0.0175552	0.180738	1.93136	14.0688	0.0256146	0.00660442	-2.77553	-0.0266759	0.0365448	0.00986888	0.00986888	0.260336	0.134794	30.055	2822946	439798	0.739664	0.26567
2010	28	SC Firm 28	1	US	0	SERV	4000	HCARE	1	0.253295	0.137935	0.0879277	0.043495	0.164362	1.83634	14.1531	0.0209919	0.0123494	2.53192	0.0374589	0.0339985	0.0714575	0.0714575	0.253295	0.137935	33.645	3225681	516126	0.746705	0.217659
2011	28	SC Firm 28	1	US	0	SERV	4000	HCARE	1	0.197039	0.112755	0.0158926	0.00829408	0.167509	1.74751	14.2781	0.0266341	0.00198815	1.60145	-0.030064	0.0375465	0.00748246	0.00748246	0.197039	0.112755	36.005	3523665	447801	0.802961	0.225359
2012	28	SC Firm 28	1	US	0	SERV	4000	HCARE	1	0.214189	0.129	0.0626021	0.0350168	0.152825	1.66038	14.4125	0.0217202	0.0104301	2.32108	0.0513723	0.0347197	0.086092	0.086092	0.214189	0.129	39.76	3977511	589092	0.785811	0.207478
2013	28	SC Firm 28	1	US	0	SERV	4000	HCARE	1	0.184227	0.0930524	0.0109745	0.00501596	0.163568	1.97982	14.5828	0.0199125	0.00611468	2.21931	-0.0115681	0.0185956	0.00702758	0.00702758	0.184227	0.0930524	53.38	5402430	554287	0.815773	0.212214
2004	29	SC Firm 29	1	US	1	MAN	9000	TECH	1	0.169054	0.0538065	0.0292169	0.00834214	0.22019	3.14188	13.6494	0.381448	0.033788	3.78574	0.019995	-0.00644768	0.0135473	0.0135473	0.169054	0.0538065	32.15	5403271	307264	0.830946	0.157556
2005	29	SC Firm 29	1	US	1	MAN	9000	TECH	1	0.259411	0.0729044	0.133823	0.0335222	0.18593	3.55823	13.7407	0.280768	0.0106567	3.34522	0.128693	0.0460632	0.174757	0.174757	0.259411	0.0729044	32.7	7754201	609770	0.740589	0.151218
2006	29	SC Firm 29	1	US	1	MAN	9000	TECH	1	0.113171	0.0321762	0	0	0.204439	3.51723	13.8544	0.266892	0.0101884	2.66663	-0.155505	0.0540805	-0.101424	-0.101424	0.113171	0.0321762	31.42	7725642	256846	0.886829	0.11684
2004	30	SC Firm 30	1	US	1	MAN	9000	TECH	1	0.206529	0.0553758	0.00429781	0.000971198	0.127074	3.72958	12.4082	0.253641	0.0431285	3.78574	0.052953	0.0402663	0.0932193	0.0932193	0.206529	0.0553758	17.36	820868	48121	0.793471	0.203104
2005	30	SC Firm 30	1	US	1	MAN	9000	TECH	1	0.15302	0.0275768	0.00251149	0.000395061	0.193119	5.54888	12.603	0.194177	0.0553214	3.34522	-0.00707297	0.134689	0.127616	0.127616	0.15302	0.0275768	27.66	1621892	45995	0.84698	0.150888
2006	30	SC Firm 30	1	US	1	MAN	9000	TECH	1	0.108953	0.0395566	0.000879459	0.000296399	0.180582	2.75436	12.8225	0.127489	0.00346486	2.66663	0.0187651	0.321916	0.340681	0.340681	0.108953	0.0395566	19.65	1349132	55565	0.891047	0.110714
2007	30	SC Firm 30	1	US	1	MAN	9000	TECH	1	0.106507	0.0305891	0.00687542	0.00182924	0.103766	3.48187	12.9996	0.108031	0.0614114	1.77857	0.0193165	0.165017	0.184333	0.184333	0.106507	0.0305891	22.14	2151054	67875	0.893493	0.100322
2008	30	SC Firm 30	1	US	1	MAN	9000	TECH	1	0.114958	0.0409693	0.00550307	0.00181661	0.1322	2.80595	13.1501	0.103324	0.0233047	-0.291621	0.0257202	0.0716848	0.097405	0.097405	0.114958	0.0409693	12.64	2046793	87438	0.885042	0.110061
2009	30	SC Firm 30	1	US	1	MAN	9000	TECH	1	0.166162	0.0987789	0.0691973	0.0392835	0.0759767	1.68216	13.0236	0.0846942	0.0418384	-2.77553	0.0583643	0.0369904	0.0953546	0.0953546	0.166162	0.0987789	17.76	1229672	134779	0.833838	0.104173
2010	30	SC Firm 30	1	US	1	MAN	9000	TECH	1	0.106752	0.0618707	0.000564598	0.000311649	0.121288	1.72541	13.1582	0.0862759	0.0292424	2.53192	-0.0464253	0.0574699	0.0110446	0.0110446	0.106752	0.0618707	22.9	1424236	93930	0.893248	0.128425
2004	31	SC Firm 31	1	US	0	SERV	5000	CSERV	1	0.274989	0.0866472	0	0	0.323721	3.17366	14.4474	0.25572	0.0919243	3.78574	0.0529774	0.0915077	0.144485	0.144485	0.274989	0.0866472	15.32	3852123	365440	0.725011	0.274989
2005	31	SC Firm 31	1	US	0	SERV	5000	CSERV	1	0.280321	0.0592768	0	0	0.333859	4.72902	14.6579	0.215189	0.00900879	3.34522	0.0527245	-0.0373861	0.0153383	0.0153383	0.280321	0.0592768	31.21	7143048	450097	0.719679	0.280321
2006	31	SC Firm 31	1	US	0	SERV	5000	CSERV	1	0.284026	0.104356	0	0	0.340896	2.72171	14.8431	0.243309	0.00760333	2.66663	0.0566536	-0.0311837	0.0254698	0.0254698	0.284026	0.104356	20.77	4825528	562246	0.715974	0.284026
2007	31	SC Firm 31	1	US	0	SERV	5000	CSERV	1	0.282284	0.221818	0	0	0.379374	1.27259	14.9324	0.334944	0.0173098	1.77857	-0.0187559	-0.201473	-0.220229	-0.220229	0.282284	0.221818	9.36	1849582	527216	0.717716	0.282284
2008	31	SC Firm 31	1	US	0	SERV	5000	CSERV	1	0.282452	0.144393	0.050538	0.0223111	0.294254	1.95613	14.8969	0.376966	0.0633525	-0.291621	0.0139682	-0.0121252	0.00184297	0.00184297	0.282452	0.144393	16.98	3286560	554645	0.717548	0.244259
2009	31	SC Firm 31	1	US	0	SERV	5000	CSERV	1	0.261736	0.165102	0.0186507	0.0104896	0.236801	1.5853	14.894	0.333533	0.041608	-2.77553	0.00233192	0.0465814	0.0489134	0.0489134	0.261736	0.165102	14.63	2829969	559631	0.738264	0.247705
2010	31	SC Firm 31	1	US	0	SERV	5000	CSERV	1	0.281344	0.163206	0	0	0.255965	1.72386	14.8957	0.342085	0.00575939	2.53192	-0.0163319	-0.0932586	-0.109591	-0.109591	0.281344	0.163206	15.29	2711934	528927	0.718656	0.281344
2011	31	SC Firm 31	1	US	0	SERV	5000	CSERV	1	0.273708	0.120732	0	0	0.222755	2.26708	14.9534	0.298422	0.0211288	1.60145	0.00257535	0.00320125	0.0057766	0.0057766	0.273708	0.120732	20.51	3888675	533951	0.726292	0.273708
2012	31	SC Firm 31	1	US	0	SERV	5000	CSERV	1	0.304584	0.169897	0	0	0.322041	1.79275	15.0613	0.290215	0.0694321	2.32108	0.000521055	0.0129506	0.0134717	0.0134717	0.304584	0.169897	14.4	2613306	534866	0.695416	0.304584
2013	31	SC Firm 31	1	US	0	SERV	5000	CSERV	1	0.31165	0.162009	0	0	0.188628	1.92366	15.0112	0.373627	0.098584	2.21931	-0.004061	-0.042382	-0.046443	-0.046443	0.31165	0.162009	13.88	2731005	527986	0.68835	0.31165
2009	32	SC Firm 32	1	US	1	MAN	3000	CGOODS	1	0.268873	0.0597477	0.000352041	6.08475e-05	0.397801	4.50013	13.9494	0.0416389	0.0471534	-2.77553	-0.137993	-0.0750922	-0.213085	-0.213085	0.268873	0.0597477	6.39999	3385306	215117	0.731127	0.268615
2010	32	SC Firm 32	1	US	1	MAN	3000	CGOODS	1	0.277738	0.0640895	0	0	0.31352	4.3336	14.0809	0.0301242	0.0948207	2.53192	0.0901827	0.0273909	0.117574	0.117574	0.277738	0.0640895	8.71332	4651874	318552	0.722262	0.277738
2011	32	SC Firm 32	1	US	1	MAN	3000	CGOODS	1	0.281299	0.0455579	0	0	0.34814	6.17454	14.348	0.0331408	0.022875	1.60145	0.0474817	-0.0994268	-0.0519451	-0.0519451	0.281299	0.0455579	15.3567	8028941	383241	0.718701	0.281299
2008	33	SC Firm 33	1	US	1	MAN	1000	BMAT	1	0.293984	0.132896	0.134644	0.0541673	0.217889	2.21214	16.1475	0.386496		-0.291621				0	0.293984	0.132896	59.73	24314878	3726600	0.706016	0.220153
2009	33	SC Firm 33	1	US	1	MAN	1000	BMAT	1	0.274149	0.144858	0.127169	0.0613377	0.13502	1.89253	15.7264	0.430101	0.0632487	-2.77553	-0.0191065	0.00906537	-0.0100412	-0.0100412	0.274149	0.144858	76.36	20565965	3483800	0.725851	0.207874
2010	33	SC Firm 33	1	US	1	MAN	1000	BMAT	1	0.225833	0.10127	0.0638013	0.0256493	0.1971	2.23001	16.1119	0.420342	0.0486191	2.53192	0.00515617	0.0362642	0.0414204	0.0414204	0.225833	0.10127	50.43	31639678	3565200	0.774167	0.20982
2011	33	SC Firm 33	1	US	1	MAN	1000	BMAT	1	0.23483	0.16192	0.0761719	0.0493453	0.186886	1.45028	16.2232	0.45211	0.0087094	1.60145	0.0212218	-0.0755764	-0.0543546	-0.0543546	0.23483	0.16192	56.63	20286428	3919400	0.76517	0.218946
2009	34	SC Firm 34	1	US	1	MAN	2000	IND	1	0.255025	0.105473	0.183243	0.0717325	0.200137	2.4179	14.214	0.113935	0.0798372	-2.77553	-0.0465389	0.250286	0.203747	0.203747	0.255025	0.105473	45.3162	2503635	295203	0.744975	0.136963
2010	34	SC Firm 34	1	US	1	MAN	2000	IND	1	0.164988	0.0617067	0.0392668	0.0134211	0.232258	2.67375	14.3414	0.124518	0.0232048	2.53192	-0.0909702	0.00177487	-0.0891953	-0.0891953	0.164988	0.0617067	62.3725	2893414	190285	0.835012	0.185622
2011	34	SC Firm 34	1	US	1	MAN	2000	IND	1	0.138379	0.0444182	0	0	0.304498	3.11536	14.5195	0.119584	0.0504835	1.60145	-0.0145312	0.00803746	-0.00649377	-0.00649377	0.138379	0.0444182	68.9867	3704628	172202	0.861621	0.20195
2012	34	SC Firm 34	1	US	1	MAN	2000	IND	1	0.119529	0.035282	0.00250594	0.000676338	0.309327	3.3878	14.6724	0.120839	0.0029904	2.32108	0.000347435	0.00286184	0.00320927	0.00320927	0.119529	0.035282	72.6795	4722250	172704	0.880471	0.176187
2013	34	SC Firm 34	1	US	1	MAN	2000	IND	1	0.234248	0.0862644	0.146679	0.0503766	0.231937	2.71547	14.7147	0.129457	0.0556452	2.21931	0.145363	0.0276803	0.173043	0.173043	0.234248	0.0862644	77.9728	4821016	455145	0.765752	0.152789
2014	34	SC Firm 34	1	US	1	MAN	2000	IND	1	0.266602	0.0900109	0.182353	0.0572133	0.217282	2.96189	14.8405	0.142836	0.0146064	2.3882	0.0457378	-0.0629432	-0.0172054	-0.0172054	0.266602	0.0900109	81.25	5554297	549399	0.733398	0.157768
2004	35	SC Firm 35	1	US	0	SERV	4000	HCARE	1	0.0846403	0.0319508	0	0	-0.0340192	2.50576	11.3336	0.0920544	0.0542895	3.78574	-0.0226008	0.267632	0.245031	0.245031	0.0846403	0.0319508	10.7332	456895	15080	0.91536	0.0800612
2005	35	SC Firm 35	1	US	0	SERV	4000	HCARE	1	0.146485	0.0459928	0	0		3.18496	11.3336	0.116169	0.129833	3.34522	0.0516174	0.0149411	0.0665585	0.0665585	0.146485	0.0459928	9.91788	482990	23285	0.853515	0.146485
2006	35	SC Firm 35	1	US	0	SERV	4000	HCARE	1	0.0969693	0.0260707	0	0		3.71948	11.5191	0.0716876	0.0540331	2.66663	0.0127873	0.410394	0.423182	0.423182	0.0969693	0.0260707	14.9245	1001996	26822	0.903031	0.0969693
2007	35	SC Firm 35	1	US	0	SERV	4000	HCARE	1	0.0936704	0.0244462	0	0	0.106148	4.39557	11.8865	0.0662726	0.0253724	1.77857	0.022248	0.334303	0.356551	0.356551	0.0936704	0.0244462	22.134	1615534	35177	0.90633	0.0936704
2008	35	SC Firm 35	1	US	0	SERV	4000	HCARE	1	0.147568	0.0349156	0	0	0.140958	4.22643	12.3143	0.0601311	0.0263951	-0.291621	0.0771215	0.0749927	0.152114	0.152114	0.147568	0.0349156	31.5942	2036747	73687	0.852432	0.147568
2009	35	SC Firm 35	1	US	0	SERV	4000	HCARE	1	0.0846403	0.0244462	0	0	0.291412	7.29543	12.6963	0.0485068	0.104496	-2.77553	-0.0890203	-0.163064	-0.252084	-0.252084	0.0846403	0.0244462	26.09	3418692	32169	0.91536	0.0775952
2010	35	SC Firm 35	1	US	0	SERV	4000	HCARE	1	0.0846403	0.0251454	0	0	0.239387	2.42866	12.8012	0.03917	0.0308966	2.53192	0.00689908	0.0233848	0.0302839	0.0302839	0.0846403	0.0251454	22.84	1405988	36266	0.91536	0.0775952
2011	35	SC Firm 35	1	US	0	SERV	4000	HCARE	1	0.0846403	0.0244462	0	0	0.270121	3.27856	12.9044	0.0377848	0.0218105	1.60145	0.0127188	0.0611892	0.073908	0.073908	0.0846403	0.0244462	20.94	1958601	44035	0.91536	0.0775952
2012	35	SC Firm 35	1	US	0	SERV	4000	HCARE	1	0.0846403	0.0272472	0	0	0.274222	2.92143	13.1143	0.0350851	0.00197133	2.32108	0.0158405	0.0621486	0.0779891	0.0779891	0.0846403	0.0272472	27.25	1962665	54975	0.91536	0.0796007
2013	35	SC Firm 35	1	US	0	SERV	4000	HCARE	1	0.0935868	0.0335785	0	0	0.294706	2.7871	13.3264	0.0343385	0.0159506	2.21931	0.0251947	0.0614366	0.0866312	0.0866312	0.0935868	0.0335785	20.98	2165104	75227	0.906413	0.0935868
2014	35	SC Firm 35	1	US	0	SERV	4000	HCARE	1	0.127233	0.0353473	0	0	0.34991	3.5995	13.5648	0.0419925	0.0349934	2.3882	0.0359171	0.0233863	0.0593034	0.0593034	0.127233	0.0353473	34.06	2860503	104816	0.872767	0.127233
2004	36	SC Firm 36	1	US	1	MAN	2000	IND	1	0.141942	0.037006	0	0	0.153509	3.83564	13.1501	0.257176	0.0124273	3.78574	0.0118026	0.0279285	0.0397311	0.0397311	0.141942	0.037006	18.1667	2151267	82669	0.858058	0.164773
2005	36	SC Firm 36	1	US	1	MAN	2000	IND	1	0.144032	0.0333356	0	0	0.173315	4.32067	13.2566	0.237254	0.0118971	3.34522	0.00813859	-0.0407193	-0.0325807	-0.0325807	0.144032	0.0333356	21.3667	2540799	87620	0.855968	0.171757
2006	36	SC Firm 36	1	US	1	MAN	2000	IND	1	0.144425	0.0456811	0	0	0.168911	3.16158	13.4006	0.201638	0.00335816	2.66663	0.0229361	0.059294	0.0822301	0.0822301	0.144425	0.0456811	18.16	2176036	104162	0.855575	0.17281
2007	36	SC Firm 36	1	US	1	MAN	2000	IND	1	0.166711	0.0490481	0	0	0.169381	3.39893	13.5149	0.184978	0.00215787	1.77857	0.0394999	-0.0179907	0.0215092	0.0215092	0.166711	0.0490481	22.22	2646581	136505	0.833289	0.192628
2008	36	SC Firm 36	1	US	1	MAN	2000	IND	1	0.171748	0.0706705	0	0	0.159523	2.43027	13.6177	0.185538	0.0068723	-0.291621	0.00779614	0.261682	0.269478	0.269478	0.171748	0.0706705	16.24	1880423	142996	0.828252	0.201964
2009	36	SC Firm 36	1	US	1	MAN	2000	IND	1	0.16432	0.0553866	0	0	0.104954	2.96678	13.4248	0.188511	0.0408221	-2.77553	-0.0115605	0.0479848	0.0364243	0.0364243	0.16432	0.0553866	19.6333	2278484	133597	0.83568	0.195084
2010	36	SC Firm 36	1	US	1	MAN	2000	IND	1	0.19346	0.0590468	0	0	0.174238	3.27639	13.6799	0.167149	0.0540739	2.53192	0.0542503	0.0644818	0.118732	0.118732	0.19346	0.0590468	25.0933	2958628	185660	0.80654	0.224175
2011	36	SC Firm 36	1	US	1	MAN	2000	IND	1	0.224464	0.0764147	0	0	0.140962	2.93744	13.8394	0.164731	0.0254967	1.60145	0.0636207	0.0650302	0.128651	0.128651	0.224464	0.0764147	25.95	3131572	259097	0.775536	0.261877
2012	36	SC Firm 36	1	US	1	MAN	2000	IND	1	0.231957	0.0858943	0	0	0.143276	2.70049	13.9498	0.19437	0.000207129	2.32108	0.0302887	0.0543483	0.084637	0.084637	0.231957	0.0858943	25.81	3171499	298011	0.768043	0.26903
2013	36	SC Firm 36	1	US	1	MAN	2000	IND	1	0.205312	0.0641438	0	0	0.124538	3.20081	13.9747	0.19394	0.0165655	2.21931	-0.0164966	0.0522563	0.0357597	0.0357597	0.205312	0.0641438	32.02	4024601	275847	0.794688	0.238522
2014	36	SC Firm 36	1	US	1	MAN	2000	IND	1	0.19965	0.0681267	0	0	0.128562	2.93057	14.0337	0.181441	0.0193112	2.3882	0.0101285	0.0323959	0.0425245	0.0425245	0.19965	0.0681267	31.09	3974834	290589	0.80035	0.232221
2006	37	SC Firm 37	1	US	1	MAN	2000	IND	1	0.238953	0.0425109	0.0258705	0.00374132	0.327094	5.62099	12.7158	0.0952084	0.0364631	2.66663	0.0251149	0.178216	0.203331	0.203331	0.238953	0.0425109	32.44	2412548	107113	0.761047	0.218742
2007	37	SC Firm 37	1	US	1	MAN	2000	IND	1	0.217155	0.0571108	0.0338914	0.00760173	0.342785	3.80235	12.9505	0.0911214	0.0165705	1.77857	0.0434566	0.0798964	0.123353	0.123353	0.217155	0.0571108	28.68	2210847	133911	0.782845	0.193284
2008	37	SC Firm 37	1	US	1	MAN	2000	IND	1	0.255242	0.0856165	0.053965	0.0153455	0.397801	2.98122	13.0693	0.123583	0.0947014	-0.291621	-0.00269278	-0.19337	-0.196063	-0.196063	0.255242	0.0856165	19.13	1415237	132513	0.744758	0.212759
2009	37	SC Firm 37	1	US	1	MAN	2000	IND	1	0.221312	0.07265	0.0417685	0.0118725	0.340541	3.04628	13.0546	0.114048	0.0965418	-2.77553	0.0167551	0.0256914	0.0424465	0.0424465	0.221312	0.07265	23.04	1830025	143367	0.778688	0.18737
2010	37	SC Firm 37	1	US	1	MAN	2000	IND	1	0.187719	0.0670085	0.0171488	0.00539324	0.344043	2.80142	13.1632	0.101238	0.00341305	2.53192	-0.00763755	-0.0198045	-0.027442	-0.027442	0.187719	0.0670085	26.05	1918125	137762	0.812281	0.173546
2004	38	SC Firm 38	1	US	1	MAN	9000	TECH	1	0.193295	0.0569038	0	0	0.180374	3.39687	14.7839	0.141381	0.0384825	3.78574	0.0264101	0.00210045	0.0285105	0.0285105	0.193295	0.0569038	36.92	15131336	912983	0.806705	0.195563
2005	38	SC Firm 38	1	US	1	MAN	9000	TECH	1	0.194182	0.0655067	0	0	0.145227	2.9643	14.5739	0.130892	0.0260034	3.34522	-0.00502006	-0.0900768	-0.0950969	-0.0950969	0.194182	0.0655067	35.87	12696042	889975	0.805818	0.19456
2006	38	SC Firm 38	1	US	1	MAN	9000	TECH	1	0.137363	0.0489225	0	0	0.181062	2.80776	14.6265	0.139193	0.0188052	2.66663	-0.085865	-0.0912018	-0.177067	-0.177067	0.137363	0.0489225	32.87	10646460	547644	0.862637	0.138219
2007	38	SC Firm 38	1	US	1	MAN	9000	TECH	1	0.209921	0.0588138	0	0	0.257158	3.56924	14.7176	0.187171	0.0475032	1.77857	0.0255872	0.0113058	0.036893	0.036893	0.209921	0.0588138	31.7	9980353	623662	0.790079	0.213336
2008	38	SC Firm 38	1	US	1	MAN	9000	TECH	1	0.212365	0.0954609	0	0	0.252859	2.22463	14.7644	0.183578	0.00130906	-0.291621	0.0105976	-0.0256008	-0.0150033	-0.0150033	0.212365	0.0954609	19.02	6219892	656419	0.787635	0.216995
2009	38	SC Firm 38	1	US	1	MAN	9000	TECH	1	0.248979	0.100839	0.13045	0.0482982	0.141967	2.46908	14.5161	0.141424	0.0726572	-2.77553	0.0541621	0.0241535	0.0783156	0.0783156	0.248979	0.100839	31.58	7480417	838913	0.751021	0.13671
2010	38	SC Firm 38	1	US	1	MAN	9000	TECH	1	0.26042	0.100806	0.111221	0.0383152	0.239658	2.58337	14.8313	0.10919	0.0786857	2.53192	0.0666233	0.0482585	0.114882	0.114882	0.26042	0.100806	37.67	10055646	1127314	0.73958	0.168285
2004	39	SC Firm 39	1	US	0	SERV	5000	CSERV	1	0.239201	0.0602805	0	0	0.268382	3.96814	13.0797	0.621319	0.00280942	3.78574	0.045067	0.0450455	0.0901125	0.0901125	0.239201	0.0602805	40.32	1210682	77662	0.760799	0.256594
2005	39	SC Firm 39	1	US	0	SERV	5000	CSERV	1	0.264281	0.0522722	0	0	0.260714	5.05586	13.3697	0.614186	0.00365837	3.34522	0.0868354	0.0521104	0.138946	0.138946	0.264281	0.0522722	65.68	2097115	115667	0.735719	0.275755
2006	39	SC Firm 39	1	US	0	SERV	5000	CSERV	1	0.267122	0.0760539	0	0	0.248647	3.51228	13.6279	0.637618	0.0127027	2.66663	0.0539541	0.0309929	0.084947	0.084947	0.267122	0.0760539	55.91	1760850	144943	0.732878	0.267122
2004	40	SC Firm 40	1	US	1	MAN	1	OILGAS	1	0.123179	0.0451025	0	0	0.216646	2.73108	13.8163	0.608711	0.0392478	3.78574	0.0268566	0.0795967	0.106453	0.106453	0.123179	0.0451025	19.45	3277573	154809	0.876821	0.234952
2005	40	SC Firm 40	1	US	1	MAN	1	OILGAS	1	0.144551	0.0436895	0	0	0.397801	3.3086	14.297	0.586845	0.129833	3.34522	0.058344	0.0494615	0.107805	0.107805	0.144551	0.0436895	32.95	5681937	259582	0.855449	0.238765
2006	40	SC Firm 40	1	US	1	MAN	1	OILGAS	1	0.201631	0.10839	0.0641565	0.0319448	0.397801	1.86023	14.6717	0.65487	0.0963539	2.66663	0.0832359	-0.188461	-0.105225	-0.105225	0.201631	0.10839	23.23	3636483	442077	0.798369	0.232628
2007	40	SC Firm 40	1	US	1	MAN	1	OILGAS	1	0.141846	0.104237	0.0230891	0.0163668	0.344503	1.3608	14.5017	0.74696	0.129833	1.77857	-0.0374809	-0.00202174	-0.0395027	-0.0395027	0.141846	0.104237	19.52	3004963	349679	0.858154	0.210599
2008	40	SC Firm 40	1	US	1	MAN	1	OILGAS	1	0.113593	0.148849	0	0	0.301443	0.763147	14.5401	0.714059	0.0317252	-0.291621	-0.0153055	0.0128778	-0.00242773	-0.00242773	0.113593	0.148849	11.51	1762121	308158	0.886407	0.215966
2009	40	SC Firm 40	1	US	1	MAN	1	OILGAS	1	0.0846403	0.0777542	0	0	0.0920376	0.960397	13.5695	0.792743	0.129833	-2.77553	-0.0410803	0.0479567	0.00687639	0.00687639	0.0846403	0.0777542	15.35	2357926	198796	0.91536	0.218039
2010	41	SC Firm 41	1	US	1	MAN	9000	TECH	1	0.142711	0.0566598	0	0	0.203397	2.51873	13.4351	0.0948396	0.0210088	2.53192	0.0306226	0.0930884	0.123711	0.123711	0.142711	0.0566598	35.64	1769295	106269	0.857289	0.147446
2011	41	SC Firm 41	1	US	1	MAN	9000	TECH	1	0.203062	0.0738889	0.0645818	0.0211606	0.229978	2.74821	13.4778	0.113253	0.0202647	1.60145	0.045034	-0.0376983	0.00733564	0.00733564	0.203062	0.0738889	36.87	1711533	136553	0.796938	0.160938
2012	41	SC Firm 41	1	US	1	MAN	9000	TECH	1	0.152256	0.0573734	0	0	0.204788	2.65378	13.544	0.129624	0.0188259	2.32108	-0.0263365	0.260639	0.234303	0.234303	0.152256	0.0573734	46.45	1912676	116416	0.847744	0.154535
2013	41	SC Firm 41	1	US	1	MAN	9000	TECH	1	0.13938	0.0563249	0	0	0.192454	2.47458	13.6154	0.165557	0.00728052	2.21931	-0.00402185	-0.0549017	-0.0589235	-0.0589235	0.13938	0.0563249	53.02	1895748	113151	0.86062	0.13938
2014	41	SC Firm 41	1	US	1	MAN	9000	TECH	1	0.169678	0.063215	0.0452817	0.0154206	0.181651	2.68414	13.6705	0.15914	0.00918325	2.3882	0.0405163	-0.0660219	-0.0255056	-0.0255056	0.169678	0.063215	47.42	2202773	148645	0.830322	0.130296
2004	42	SC Firm 42	1	US	1	MAN	9000	TECH	1	0.164577	0.0759677	0	0	0.0968223	2.1664	13.1998	0.0325157	0.0235515	3.78574	0.0134379	0.0267425	0.0401805	0.0401805	0.164577	0.0759677	11.66	2311393	190027	0.835423	0.164577
2005	42	SC Firm 42	1	US	1	MAN	9000	TECH	1	0.200234	0.136428	0	0	0.102803	1.46769	13.2719	0.032941	0.0107976	3.34522	0.022871	-0.0721383	-0.0492673	-0.0492673	0.200234	0.136428	7.65	1357957	214531	0.799766	0.200234
2006	42	SC Firm 42	1	US	1	MAN	9000	TECH	1	0.204447	0.0808625	0	0	0.092919	2.52833	13.4333	0.0331307	0.00488381	2.66663	0.0241711	0.0691605	0.0933316	0.0933316	0.204447	0.0808625	15.455	2765456	243295	0.795553	0.204447
2007	42	SC Firm 42	1	US	1	MAN	9000	TECH	1	0.221822	0.105882	0	0	0.101867	2.095	13.7428	0.04358	0.000764917	1.77857	0.0377779	0.0772192	0.114997	0.114997	0.221822	0.105882	13.89	2476227	293235	0.778178	0.225384
2008	42	SC Firm 42	1	US	1	MAN	9000	TECH	1	0.240047	0.214136	0	0	0.127023	1.121	13.8825	0.0604954	0.0137217	-0.291621	0.0105417	0.00504272	0.0155844	0.0155844	0.240047	0.214136	6.755	1125579	306704	0.759953	0.242112
2009	42	SC Firm 42	1	US	1	MAN	9000	TECH	1	0.23764	0.135037	0	0	0.100744	1.75982	13.7819	0.0586276	0.0185166	-2.77553	0.0163374	0.0380612	0.0543985	0.0543985	0.23764	0.135037	12.485	2109591	329346	0.76236	0.23959
2010	42	SC Firm 42	1	US	1	MAN	9000	TECH	1	0.239354	0.0989181	0	0	0.0513162	2.41972	13.9278	0.0712942	0.0353503	2.53192	0.0265167	0.0625822	0.0890988	0.0890988	0.239354	0.0989181	19.49	3373912	370378	0.760646	0.240684
2011	42	SC Firm 42	1	US	1	MAN	9000	TECH	1	0.257009	0.141612	0	0	0.122623	1.81488	14.1535	0.0687791	0.0495566	1.60145	0.0562406	0.0471589	0.1034	0.1034	0.257009	0.141612	16.3	2873967	474131	0.742991	0.257311
2012	42	SC Firm 42	1	US	1	MAN	9000	TECH	1	0.253303	0.208956	0	0	0.063566	1.21223	14.1467	0.0697116	0.0435618	2.32108	0.00538319	0.0410456	0.0464287	0.0464287	0.253303	0.208956	10.46	1833888	484426	0.746697	0.253427
2009	43	SC Firm 43	1	US	1	MAN	9000	TECH	1	0.260516	0.113754	0.137006	0.0546788	0.130266	2.29017	13.1556	0.0182957	0.00456571	-2.77553	-0.0280442	-0.00357935	-0.0316236	-0.0316236	0.260516	0.113754	43.46	3897303	500238	0.739484	0.199005
2010	43	SC Firm 43	1	US	1	MAN	9000	TECH	1	0.245393	0.0985876	0.0904091	0.0323476	0.131144	2.48909	13.2712	0.0173593	0.00396314	2.53192	0.0101948	0.0149887	0.0251834	0.0251834	0.245393	0.0985876	52.07	4772060	521921	0.754607	0.205664
2011	43	SC Firm 43	1	US	1	MAN	9000	TECH	1	0.241938	0.100412	0.0643113	0.0234738	0.135013	2.40945	13.4465	0.0186394	0.00379379	1.60145	0.0287763	0.0287776	0.0575539	0.0575539	0.241938	0.100412	57.28	5307092	592379	0.758062	0.231338
2012	43	SC Firm 43	1	US	1	MAN	9000	TECH	1	0.220258	0.0842779	0.0254757	0.00844539	0.145959	2.61347	13.5899	0.0200401	0.00335049	2.32108	-0.00693215	-0.0101484	-0.0170805	-0.0170805	0.220258	0.0842779	67.34	6240106	574304	0.779742	0.235473
2013	43	SC Firm 43	1	US	1	MAN	9000	TECH	1	0.190729	0.0605922	0	0	0.147872	3.14775	13.6662	0.028899	0.00355744	2.21931	-0.0202275	-0.0276578	-0.0478853	-0.0478853	0.190729	0.0605922	87.2	8050137	519237	0.809271	0.215303
2014	43	SC Firm 43	1	US	1	MAN	9000	TECH	1	0.187164	0.0652115	0	0	0.154786	2.87011	13.7494	0.0233023	0.00496336	2.3882	-9.01192e-06	-0.0731566	-0.0731656	-0.0731656	0.187164	0.0652115	82	7442759	519212	0.812836	0.200642
2007	44	SC Firm 44	1	US	1	MAN	2000	IND	1	0.323978	0.12212	0.0796373	0.0245009	0.267632	2.65294	15.7204	0.182873	0.0462187	1.77857	-0.0724451	0.0428919	-0.0295532	-0.0295532	0.323978	0.12212	59.48	14090465	1960100	0.676022	0.272921
2008	44	SC Firm 44	1	US	1	MAN	2000	IND	1	0.260333	0.165409	0.0578559	0.0334242	0.257774	1.57387	15.7281	0.170054	0.0068466	-0.291621	-0.0312881	-0.0208885	-0.0521766	-0.0521766	0.260333	0.165409	110.35	8828804	1749800	0.739667	0.231544
2009	44	SC Firm 44	1	US	1	MAN	2000	IND	1	0.213336	0.0851096	0.0398318	0.0140308	0.205451	2.5066	15.5128	0.157492	0.036612	-2.77553	-0.015077	0.0195674	0.00449045	0.00449045	0.213336	0.0851096	139.21	17568003	1634300	0.786664	0.198663
2010	44	SC Firm 44	1	US	1	MAN	2000	IND	1	0.178653	0.069262	0.0311623	0.0108845	0.185766	2.57938	15.6415	0.133409	0.0128252	2.53192	-0.00382988	0.0371934	0.0333635	0.0333635	0.178653	0.069262	164.79	21500684	1600000	0.821347	0.173941
2011	44	SC Firm 44	1	US	1	MAN	2000	IND	1	0.183638	0.0716714	0.0235841	0.0082217	0.188696	2.56223	15.7899	0.125223	0.00360063	1.60145	0.0321059	0.00540781	0.0375137	0.0375137	0.183638	0.0716714	189.42	25115027	1939000	0.816362	0.188459
2011	45	SC Firm 45	1	US	1	MAN	9000	TECH	1	0.302983	0.190619	0.184103	0.108936	0.103238	1.58947	13.6778	0.205188	0.0796557	1.60145	-0.0588699	-0.00506021	-0.0639302	-0.0639302	0.302983	0.190619	17.92	1240924	292253	0.697017	0.145705
2012	45	SC Firm 45	1	US	1	MAN	9000	TECH	1	0.314362	0.168517	0.113772	0.0536997	0.0792769	1.86546	13.779	0.2055	0.0159599	2.32108	0.000785409	0.021118	0.0219035	0.0219035	0.314362	0.168517	20.64	1445626	292985	0.685638	0.226341
2013	45	SC Firm 45	1	US	1	MAN	9000	TECH	1	0.264125	0.04892	0.114144	0.0181305	0.127522	5.39912	13.9537	0.212967	0.0319779	2.21931	-0.0542294	0.0277938	-0.0264356	-0.0264356	0.264125	0.04892	66.36	4725794	243077	0.735875	0.170266
2014	45	SC Firm 45	1	US	1	MAN	9000	TECH	1	0.0846403	0.0334546	0	0	0.0703773	1.77391	14.3526	0.128166	0.00555388	2.3882	0.0240778	0.410394	0.434472	0.434472	0.0846403	0.0334546	50.9	11817398	409030	0.91536	0.10435
2004	46	SC Firm 46	1	US	1	MAN	9000	TECH	1	0.106839	0.0244462	0	0	0.211922	6.00614	15.4007	0.0623845	0.0103351	3.78574	-0.00627209	0.0604175	0.0541454	0.0541454	0.106839	0.0244462	42.4	63830400	1156000	0.893161	0.106839
2005	46	SC Firm 46	1	US	1	MAN	9000	TECH	1	0.108983	0.0244462	0	0	0.207549	5.99138	15.5512	0.0818976	0.00393436	3.34522	0.0163475	-0.0131421	0.00320539	0.00320539	0.108983	0.0244462	43.08	73406400	1360000	0.891017	0.108983
2006	46	SC Firm 46	1	US	1	MAN	9000	TECH	1	0.11849	0.0280045	0	0	0.1947	4.23111	15.8339	0.0974487	0.0101262	2.66663	0.0290637	0.0338638	0.0629274	0.0629274	0.11849	0.0280045	37.79	62544720	1802000	0.88151	0.11849
2007	46	SC Firm 46	1	US	1	MAN	9000	TECH	1	0.143823	0.0368319	0	0	0.176696	3.90484	15.9983	0.0966748	0.0148497	1.77857	0.0463909	-0.000648824	0.0457421	0.0457421	0.143823	0.0368319	39.35	69559960	2660000	0.856177	0.143823
2008	46	SC Firm 46	1	US	1	MAN	9000	TECH	1	0.264689	0.079331	0	0	0.169391	3.33652	16.2262	0.0874879	0.00349392	-0.291621	0.157049	0.00647459	0.163524	0.163524	0.264689	0.079331	35.83	75911040	6541000	0.735311	0.273875
2009	46	SC Firm 46	1	US	1	MAN	9000	TECH	1	0.258043	0.0866975	0.00827936	0.00227351	0.152669	2.97636	16.1561	0.0869739	0.0151371	-2.77553	0.0197122	0.0609947	0.0807069	0.0807069	0.258043	0.0866975	46.26	74604300	7082000	0.741957	0.253562
2010	46	SC Firm 46	1	US	1	MAN	9000	TECH	1	0.317742	0.119148	0.0567966	0.0171889	0.143628	2.66677	16.2118	0.07762	0.00539017	2.53192	0.0860918	-0.0515177	0.0345741	0.0345741	0.317742	0.119148	49.49	71814600	9714000	0.682258	0.276658
2011	46	SC Firm 46	1	US	1	MAN	9000	TECH	1	0.260035	0.100746	0.0355699	0.0116215	0.170254	2.58109	16.5207	0.0662786	0.0135867	1.60145	-0.00667179	0.0876943	0.0810225	0.0810225	0.260035	0.100746	54.7	84537490	9471000	0.739965	0.232744
2012	46	SC Firm 46	1	US	1	MAN	9000	TECH	1	0.220613	0.0817574	0	0	0.155445	2.69838	16.7663	0.0662838	0.00466895	2.32108	0.000418488	0.0482424	0.0486608	0.0486608	0.220613	0.0817574	61.8596	106573820	9489000	0.779387	0.220613
2013	46	SC Firm 46	1	US	1	MAN	9000	TECH	1	0.207136	0.0766733	0.000470849	0.000149711	0.188461	2.70154	17.029	0.065801	0.0223423	2.21931	-0.00134019	-0.0482248	-0.049565	-0.049565	0.207136	0.0766733	74.25	113535300	9428000	0.792864	0.206762
2014	46	SC Firm 46	1	US	1	MAN	9000	TECH	1	0.193622	0.0698321	0	0	0.185449	2.77268	17.0922	0.0512002	0.00310052	2.3882	-0.000473504	-0.0464652	-0.0469387	-0.0469387	0.193622	0.0698321	74.33	125275140	9405000	0.806378	0.193622
2008	47	SC Firm 47	1	US	1	MAN	2000	IND	1	0.222566	0.168343	0.0427143	0.0305844	0.113295	1.32209	15.1453	0.178591	0.0220919	-0.291621	-0.0869407	0.0988744	0.0119337	0.0119337	0.222566	0.168343	19.8	3912292	791924	0.777434	0.211445
2009	47	SC Firm 47	1	US	1	MAN	2000	IND	1	0.204082	0.161036	0.038169	0.0288498	0.0893709	1.26731	15.0149	0.207541	0.01588	-2.77553	0.0117252	0.0846162	0.0963414	0.0963414	0.204082	0.161036	20.84	4377246	840196	0.795918	0.213201
2010	47	SC Firm 47	1	US	1	MAN	2000	IND	1	0.175863	0.153368	0.000370765	0.000314767	0.0881885	1.14667	15.1046	0.207492	0.0018438	2.53192	-0.0176769	0.0340506	0.0163738	0.0163738	0.175863	0.153368	19.92	4214486	763457	0.824137	0.224437
2011	47	SC Firm 47	1	US	1	MAN	2000	IND	1	0.230579	0.196107	1.54882e-05	1.26079e-05	0.0710251	1.17578	15.2491	0.199804	0.0104227	1.60145	0.0681109	-0.0201472	0.0479637	0.0479637	0.230579	0.196107	21.54	4441613	1083518	0.769421	0.280288
2012	47	SC Firm 47	1	US	1	MAN	2000	IND	1	0.223539	0.164947	0	0	0.121211	1.35522	15.5939	0.203469	0.034658	2.32108	0.0127687	0.0134947	0.0262634	0.0262634	0.223539	0.164947	27.29	5817674	1149159	0.776461	0.267316
2013	47	SC Firm 47	1	US	1	MAN	2000	IND	1	0.226954	0.16141	0.000498585	0.000326935	0.118854	1.40607	15.6908	0.208106	0.000338174	2.21931	0.0285923	0.0146593	0.0432516	0.0432516	0.226954	0.16141	31.56	6830934	1314801	0.773046	0.268731
2014	47	SC Firm 47	1	US	1	MAN	2000	IND	1	0.24765	0.201535	0.016845	0.0129675	0.106082	1.22882	15.8762	0.174203	0.0110389	2.3882	0.0393489	-0.0041676	0.0351813	0.0351813	0.24765	0.201535	28.39	6193158	1563172	0.75235	0.271892
2006	48	SC Firm 48	1	US	0	SERV	4000	HCARE	1	0.253851	0.0674911	0.138083	0.032958	0.171182	3.76125	13.3163	0.242246	0.00599667	2.66663	-0.0308563	0.1795	0.148643	0.148643	0.253851	0.0674911	24.61	3552721	257131	0.746149	0.151731
2007	48	SC Firm 48	1	US	0	SERV	4000	HCARE	1	0.241624	0.0863114	0.108865	0.034955	0.110309	2.79944	13.4819	0.248059	0.0415227	1.77857	0.0362544	0.101775	0.13803	0.13803	0.241624	0.0863114	26.265	3202496	302523	0.758376	0.16359
2008	48	SC Firm 48	1	US	0	SERV	4000	HCARE	1	0.217562	0.101247	0.111212	0.0482488	0.145685	2.14882	13.6357	0.253952	0.0221778	-0.291621	0.00239616	0.0278805	0.0302767	0.0302767	0.217562	0.101247	18.74	2715348	305892	0.782438	0.132696
2009	48	SC Firm 48	1	US	0	SERV	4000	HCARE	1	0.253082	0.110728	0.125565	0.050124	0.161989	2.28561	13.7329	0.250412	0.0161409	-2.77553	0.0502312	-0.0797278	-0.0294966	-0.0294966	0.253082	0.110728	26.135	3064982	381639	0.746918	0.153213
2010	48	SC Firm 48	1	US	0	SERV	4000	HCARE	1	0.201715	0.0665489	0.0856954	0.0257633	0.185653	3.03107	13.9038	0.23804	0.0152712	2.53192	-0.0329385	-0.0111197	-0.0440581	-0.0440581	0.201715	0.0665489	34.64	4601657	328068	0.798285	0.13353
2011	48	SC Firm 48	1	US	0	SERV	4000	HCARE	1	0.159568	0.0657077	0.0544675	0.020892	0.164259	2.42845	14.0332	0.223356	0.0124965	1.60145	0.000998588	0.103181	0.104179	0.104179	0.159568	0.0657077	25.4	4694149	330134	0.840432	0.115046
2012	48	SC Firm 48	1	US	0	SERV	4000	HCARE	1	0.243887	0.105281	0.13433	0.0535756	0.17787	2.31654	14.1292	0.203176	0.00536187	2.32108	0.0894653	-0.176422	-0.0869572	-0.0869572	0.243887	0.105281	41.57	4431056	521399	0.756113	0.130694
2013	48	SC Firm 48	1	US	0	SERV	4000	HCARE	1	0.267021	0.0843373	0.156562	0.0448274	0.207113	3.16611	14.2306	0.186108	0.0240368	2.21931	0.0311713	-0.0931768	-0.0620056	-0.0620056	0.267021	0.0843373	47.08	6409081	590310	0.732979	0.13544
2014	48	SC Firm 48	1	US	0	SERV	4000	HCARE	1	0.250744	0.0769266	0.145326	0.0406228	0.205368	3.25953	14.257	0.183941	0.0018051	2.3882	0.000714963	-0.0233811	-0.0226662	-0.0226662	0.250744	0.0769266	56.06	7103619	591998	0.749256	0.127883
2004	49	SC Firm 49	1	US	1	MAN	2000	IND	1	0.239257	0.0533298	0.00256286	0.000460028	0.233601	4.48637	14.7997	0.0799086	0.129672	3.78574	0.074918	0.0861773	0.161095	0.161095	0.239257	0.0533298	29.43	5090827	286787	0.760743	0.237302
2005	49	SC Firm 49	1	US	1	MAN	2000	IND	1	0.263757	0.0510368	0.00313576	0.000472012	0.32802	5.16798	15.021	0.0838069	0.0682127	3.34522	0.0462779	0.108967	0.155245	0.155245	0.263757	0.0510368	37.89	6467126	347813	0.736243	0.261441
2006	49	SC Firm 49	1	US	1	MAN	2000	IND	1	0.285363	0.0626386	0.00400625	0.000672686	0.308632	4.5557	15.2052	0.0905271	0.0134023	2.66663	0.0469746	0.156165	0.20314	0.20314	0.285363	0.0626386	37.12	6230512	416350	0.714637	0.282488
2007	49	SC Firm 49	1	US	1	MAN	2000	IND	1	0.321485	0.0983622	0.00417235	0.000963768	0.330878	3.26838	15.3514	0.10502	0.0148774	1.77857	0.034406	-0.0404207	-0.00601463	-0.00601463	0.321485	0.0983622	27.04	4273877	466249	0.678515	0.318642
2008	49	SC Firm 49	1	US	1	MAN	2000	IND	1	0.303121	0.119857	0.00202559	0.000635049	0.345168	2.52902	15.3417	0.103197	0.0252969	-0.291621	-0.0271183	-0.000114035	-0.0272324	-0.0272324	0.303121	0.119857	20.82	3142640	427962	0.696879	0.301707
2009	49	SC Firm 49	1	US	1	MAN	2000	IND	1	0.29896	0.0880706	0.00209825	0.000475953	0.101739	3.39454	14.9262	0.0971208	0.129833	-2.77553	-0.034465	-0.065505	-0.09997	-0.09997	0.29896	0.0880706	26.73	3973290	383725	0.70104	0.297485
2004	50	SC Firm 50	1	US	1	MAN	1000	BMAT	1	0.0846403	0.0244462	0	0	0.166004	3.1762	11.3336	0.431193	0.0236538	3.78574	-0.00080195	0.00752764	0.00672569	0.00672569	0.0846403	0.0244462	18.24	294500	2545	0.91536	0.113599
2005	50	SC Firm 50	1	US	1	MAN	1000	BMAT	1	0.0846403	0.0244462	0	0	0.174622	4.16454	11.3336	0.438017	0.00900157	3.34522	0.00440783	0.00795559	0.0123634	0.0123634	0.0846403	0.0244462	34.73	423111	2996	0.91536	0.103423
2006	50	SC Firm 50	1	US	1	MAN	1000	BMAT	1	0.0846403	0.0244462	0	0	0.102891	3.84027	11.3336	0.492475	0.0461139	2.66663	0.00247868	0.365204	0.367683	0.367683	0.0846403	0.0244462	35.98	656202	3421.75	0.91536	0.0775952
2007	50	SC Firm 50	1	US	1	MAN	1000	BMAT	1	0.0887654	0.0444017	0.0462227	0.022594	0.103112	1.99915	11.3336	0.605187	0.00130367	1.77857	0.0791712	0.401561	0.480732	0.480732	0.0887654	0.0444017	30.52	681337	31658.2	0.911235	0.0775952
2008	50	SC Firm 50	1	US	1	MAN	1000	BMAT	1	0.0846403	0.0332557	0.0299999	0.0145876	0.0940661	2.01618	11.3336	0.550829	0.0137913	-0.291621	0.00905163	0.318353	0.327405	0.327405	0.0846403	0.0332557	49.21	1063935	36599	0.91536	0.0858899
2009	50	SC Firm 50	1	US	1	MAN	1000	BMAT	1	0.0846403	0.0244462	0.0243037	0.0112779	0.0739205	2.1295	11.3336	0.562974	0.0188983	-2.77553	0.000633393	0.291793	0.292426	0.292426	0.0846403	0.0244462	47.09	1687624	37112	0.91536	0.0775952
2010	50	SC Firm 50	1	US	1	MAN	1000	BMAT	1	0.163852	0.104001	0.13743	0.0862349	0.0612395	1.57548	11.8246	0.791708	0.000916272	2.53192	0.143957	0.410394	0.554351	0.554351	0.163852	0.104001	54.63	2633165	305639	0.836148	0.114251
2011	50	SC Firm 50	1	US	1	MAN	1000	BMAT	1	0.152402	0.082394	0.122959	0.0654318	0.097926	1.84968	12.2852	0.885766	0.0212854	1.60145	-0.00823198	0.00257003	-0.00566195	-0.00566195	0.152402	0.082394	67.43	3229408	289976	0.847598	0.113754
2012	50	SC Firm 50	1	US	1	MAN	1000	BMAT	1	0.149754	0.0709774	0.126742	0.0592273	0.0980333	2.10988	12.4801	0.795748	0.00280641	2.32108	0.0277289	0.146295	0.174024	0.174024	0.149754	0.0709774	81.36	4657983	355870	0.850246	0.102955
2013	50	SC Firm 50	1	US	1	MAN	1000	BMAT	1	0.131546	0.122845	0.10698	0.0997171	0.0881779	1.07083	12.575	0.729783	0.00534395	2.21931	0.00905814	0.16573	0.174788	0.174788	0.131546	0.122845	46.07	2728941	382187	0.868454	0.0874909
2014	50	SC Firm 50	1	US	1	MAN	1000	BMAT	1	0.126906	0.0690773	0.109947	0.0593213	0.0691886	1.83716	12.3765	0.729391	0.0150722	2.3882	-0.00526812	-0.0024748	-0.00774292	-0.00774292	0.126906	0.0690773	62.7	4945272	366954	0.873094	0.0777989
2007	51	SC Firm 51	1	US	1	MAN	9000	TECH	1	0.117829	0.0629184	0	0	0.12158	1.87273	12.5595	0.0773092	0.0347751	1.77857	0.0218936	-0.208	-0.186107	-0.186107	0.117829	0.0629184	11.27	693908	46591	0.882171	0.11811
2008	51	SC Firm 51	1	US	1	MAN	9000	TECH	1	0.101413	0.0444352	0	0	0.124823	2.28226	12.5941	0.075538	0.0065929	-0.291621	-0.00930857	-0.0195368	-0.0288454	-0.0288454	0.101413	0.0444352	17.01	917690	42674	0.898587	0.101653
2009	51	SC Firm 51	1	US	1	MAN	9000	TECH	1	0.178979	0.0621175	0	0	0.0813192	2.8813	12.5657	0.0740102	0.0282644	-2.77553	0.0960035	0.0839364	0.17994	0.17994	0.178979	0.0621175	22.64	1389789	92048	0.821021	0.211072
2010	51	SC Firm 51	1	US	1	MAN	9000	TECH	1	0.182149	0.0600368	0	0	0.144264	3.03396	13.027	0.0860347	0.0383753	2.53192	0.0426704	0.0680619	0.110732	0.110732	0.182149	0.0600368	24.82	1882030	120208	0.817851	0.198999
2011	51	SC Firm 51	1	US	1	MAN	9000	TECH	1	0.130979	0.0392024	0	0	0.167206	3.34111	13.0828	0.095981	0.0157933	1.60145	-0.0345233	0.00325751	-0.0312658	-0.0312658	0.130979	0.0392024	28.95	2331583	95133	0.869021	0.132356
2011	52	SC Firm 52	1	US	1	MAN	2000	IND	1	0.307529	0.156452	0	0	0.1895	1.96564	14.6098	0.0754308	0.0292317	1.60145	-0.0602373	0.0125397	-0.0476976	-0.0476976	0.307529	0.156452	35.17	1517057	281368	0.692471	0.307529
2012	52	SC Firm 52	1	US	1	MAN	2000	IND	1	0.301452	0.157934	0	0	0.198607	1.90872	14.6807	0.0863692	0.00723565	2.32108	0.00902531	-0.0378005	-0.0287752	-0.0287752	0.301452	0.157934	42.01	1546484	290052	0.698548	0.301452
2013	52	SC Firm 52	1	US	1	MAN	2000	IND	1	0.282506	0.127974	0	0	0.190925	2.20752	14.7166	0.0786271	0.00593682	2.21931	0.00853778	0.00612257	0.0146603	0.0146603	0.282506	0.127974	49.09	2038028	299091	0.717494	0.282506
2006	53	SC Firm 53	1	US	1	MAN	9000	TECH	1	0.172218	0.058652	0	0	0.037878	2.93627	12.5713	0.00747944	0.0133822	2.66663	0.0222694	0.0574618	0.0797313	0.0797313	0.172218	0.058652	34.65	1898889	118313	0.827782	0.172218
2007	53	SC Firm 53	1	US	1	MAN	9000	TECH	1	0.162692	0.064298	0	0	0.0458223	2.53028	12.7292	0.00747944	0.0105319	1.77857	0.0218841	-0.0832768	-0.0613927	-0.0613927	0.162692	0.064298	37.43	1989353	136701	0.837308	0.162692
2008	53	SC Firm 53	1	US	1	MAN	9000	TECH	1	0.195092	0.0521288	0	0	0.114667	3.7425	12.9376	0.00747944	0.0429926	-0.291621	-0.0238945	-0.208	-0.231895	-0.231895	0.195092	0.0521288	48.38	2214449	121785	0.804908	0.195092
2009	53	SC Firm 53	1	US	1	MAN	9000	TECH	1	0.152176	0.0529511	0	0	0.117081	2.8739	12.9968	0.00747944	0.00157876	-2.77553	-0.0117697	0.0730227	0.0612529	0.0612529	0.152176	0.0529511	46.02	2021797	113042	0.847824	0.152176
2007	54	SC Firm 54	1	US	1	MAN	3000	CGOODS	1	0.24314	0.183726	0.0262585	0.0185435	0.157718	1.32338	14.1478	0.118844	0.0115272	1.77857	-0.104655	0.12715	0.0224946	0.0224946	0.24314	0.183726	6.50333	894416	201314	0.75686	0.22273
2008	54	SC Firm 54	1	US	1	MAN	3000	CGOODS	1	0.236927	0.259592	0.024451	0.0275232	0.0882501	0.912689	14.1807	0.180023	0.0483589	-0.291621	0.00719946	-0.0152525	-0.00805303	-0.00805303	0.236927	0.259592	4.27333	592181	207623	0.763073	0.217802
2009	54	SC Firm 54	1	US	1	MAN	3000	CGOODS	1	0.250745	0.15411	0.0237875	0.0130917	0.0951994	1.62705	14.1777	0.172434	0.00403545	-2.77553	0.0421947	0.0226307	0.0648253	0.0648253	0.250745	0.15411	9.80332	1370182	249630	0.749255	0.232488
2010	54	SC Firm 54	1	US	1	MAN	3000	CGOODS	1	0.303949	0.291463	0.0827928	0.0783688	0.17217	1.04284	14.5121	0.225171	0.0544985	2.53192	0.112632	0.0200284	0.13266	0.13266	0.303949	0.291463	6.66666	964100	396591	0.696051	0.241119
2008	55	SC Firm 55	1	US	1	MAN	9000	TECH	1	0.236132	0.190916	0.165763	0.131698	0.115322	1.23684	13.6647	0.140248	0.0138602	-0.291621	-0.0903471	0.037912	-0.0524351	-0.0524351	0.236132	0.190916	5.54	1236972	291883	0.763868	0.0843517
2009	55	SC Firm 55	1	US	1	MAN	9000	TECH	1	0.180256	0.105991	0.10011	0.0565856	0.102186	1.70067	13.5956	0.119991	0.0061809	-2.77553	-0.0355399	0.101016	0.0654766	0.0654766	0.180256	0.105991	14.19	2056499	243812	0.819744	0.0890617
2010	55	SC Firm 55	1	US	1	MAN	9000	TECH	1	0.158215	0.0623333	0.0537202	0.0196838	0.160745	2.53821	13.8849	0.130663	0.043994	2.53192	0.00232985	0.0450899	0.0474198	0.0474198	0.158215	0.0623333	28.63	3722431	247456	0.841785	0.110427
2011	55	SC Firm 55	1	US	1	MAN	9000	TECH	1	0.148802	0.0775174	0.0159548	0.00773332	0.203943	1.9196	14.1654	0.13297	0.025749	1.60145	0.0179	0.034868	0.052768	0.052768	0.148802	0.0775174	16.22	3347493	281294	0.851198	0.135001
2012	55	SC Firm 55	1	US	1	MAN	9000	TECH	1	0.108163	0.0485342	0	0	0.181691	2.22858	14.2657	0.130769	0.0210968	2.32108	-0.0234925	0.0441496	0.0206571	0.0206571	0.108163	0.0485342	20.3	4530494	231100	0.891837	0.108163
2013	55	SC Firm 55	1	US	1	MAN	9000	TECH	1	0.0994385	0.0474799	0	0	0.194977	2.09433	14.3988	0.140843	0.0120451	2.21931	0.000385753	-0.0353607	-0.0349749	-0.0349749	0.0994385	0.0474799	28.56	4654283	232000	0.900561	0.0994385
2014	55	SC Firm 55	1	US	1	MAN	9000	TECH	1	0.14843	0.0405151	0	0	0.233876	3.66356	14.6447	0.186933	0.0296685	2.3882	0.070415	0.00514493	0.0755599	0.0755599	0.14843	0.0405151	72.71	10453300	441400	0.85157	0.14843
2004	56	SC Firm 56	1	US	1	MAN	9000	TECH	1	0.234128	0.094748	0.0469525	0.0165876	0.191285	2.47106	15.8966	0.111261	0.110495	3.78574	0.0607039	-0.0251044	0.0355995	0.0355995	0.234128	0.094748	17.1	27052250	2831418	0.765872	0.196397
2005	56	SC Firm 56	1	US	1	MAN	9000	TECH	1	0.2077	0.0817648	0.044411	0.0155411	0.155149	2.54022	15.7603	0.113143	0.0236146	3.34522	-0.0435534	-0.123976	-0.167529	-0.167529	0.2077	0.0817648	17.94	26285514	2340608	0.7923	0.170878
2006	56	SC Firm 56	1	US	1	MAN	9000	TECH	1	0.298437	0.105377	0.0576942	0.0166708	0.264022	2.8321	16.0311	0.108038	0.0756678	2.66663	0.0515597	-0.208	-0.156441	-0.156441	0.298437	0.105377	18.45	24021260	2829437	0.701563	0.255483
2007	56	SC Firm 56	1	US	1	MAN	9000	TECH	1	0.266441	0.0980442	0.0255215	0.00777703	0.250065	2.71756	16.0912	0.0985945	0.00749638	1.77857	0.00107219	-0.0207253	-0.0196531	-0.0196531	0.266441	0.0980442	17.76	26134509	2840869	0.733559	0.247229
2008	56	SC Firm 56	1	US	1	MAN	9000	TECH	1	0.314125	0.1856	0.0261422	0.0131815	0.153875	1.69249	15.911	0.0994156	0.0707831	-0.291621	0.0560125	-0.0918062	-0.0357937	-0.0357937	0.314125	0.1856	10.13	15170675	3457360	0.685875	0.295713
2009	56	SC Firm 56	1	US	1	MAN	9000	TECH	1	0.25899	0.124953	0.02767	0.011493	0.0155703	2.0727	15.4277	0.113892	0.0987409	-2.77553	-0.10212	0.0222403	-0.07988	-0.07988	0.25899	0.124953	13.94	17364875	2479635	0.74101	0.237903
2010	56	SC Firm 56	1	US	1	MAN	9000	TECH	1	0.311352	0.172013	0.0265485	0.0123766	0.185967	1.81005	16.0719	0.0879991	0.122319	2.53192	0.0847636	-0.0123668	0.0723968	0.0723968	0.311352	0.172013	14.05	16400775	3407232	0.688648	0.292571
2010	57	SC Firm 57	1	US	1	MAN	9000	TECH	1	0.290403	0.0495197	0	0	0.275436	5.86438	11.9342	0.0270813	0.0278224	2.53192	-0.0829814	0.168892	0.085911	0.085911	0.290403	0.0495197	19.25	1379432	71868	0.709597	0.290403
2011	57	SC Firm 57	1	US	1	MAN	9000	TECH	1	0.268129	0.0452428	0	0	0.261159	5.92644	12.1978	0.0202562	0.0138136	1.60145	0.0698219	0.0750094	0.144831	0.144831	0.268129	0.0452428	27.95	2050618	97172	0.731871	0.268926
2012	57	SC Firm 57	1	US	1	MAN	9000	TECH	1	0.259179	0.0331219	0	0	0.255082	7.29543	12.5023	0.0161231	0.00996027	2.32108	0.0713691	0.0709671	0.142336	0.142336	0.259179	0.0331219	52.45	3914522	134098	0.740821	0.260113
2013	57	SC Firm 57	1	US	1	MAN	9000	TECH	1	0.307886	0.0711839	0.0756331	0.0139004	0.214988	4.32522	12.723	0.0130433	0.0301781	2.21931	0.118038	0.0223603	0.140398	0.140398	0.307886	0.0711839	37.83	2837614	217473	0.692114	0.2583
2014	57	SC Firm 57	1	US	1	MAN	9000	TECH	1	0.279812	0.0581704	0	0	0.184939	4.81022	12.9685	0.0286219	0.0257468	2.3882	0.0162188	0.0329636	0.0491823	0.0491823	0.279812	0.0581704	49.83	3737729	230854	0.720188	0.286259
2004	58	SC Firm 58	1	US	1	MAN	3000	CGOODS	1	0.116746	0.0825971	0	0	0.127909	1.41344	12.7312	0.111114	0.0616846	3.78574	0.0165317	-0.0364587	-0.0199271	-0.0199271	0.116746	0.0825971	3.72544	241743	21765	0.883254	0.116746
2005	58	SC Firm 58	1	US	1	MAN	3000	CGOODS	1	0.1401	0.0679677	0	0	0.17574	2.06127	12.8368	0.0987021	0.0351748	3.34522	0.0373026	0.0567379	0.0940405	0.0940405	0.1401	0.0679677	5.77384	406765	29663	0.8599	0.1401
2006	58	SC Firm 58	1	US	1	MAN	3000	CGOODS	1	0.156998	0.0505949	0	0	0.338129	3.10303	13.0714	0.0908621	0.113066	2.66663	0.0390028	0.0204302	0.0594331	0.0594331	0.156998	0.0505949	10.3971	740610	39468	0.843002	0.156998
2007	58	SC Firm 58	1	US	1	MAN	3000	CGOODS	1	0.192056	0.112859	0	0	0.230184	1.70173	12.974	0.107507	0.0798478	1.77857	0.0439703	-0.121161	-0.0771909	-0.0771909	0.192056	0.112859	5.92593	402360	51187	0.807944	0.192056
2008	58	SC Firm 58	1	US	1	MAN	3000	CGOODS	1	0.275564	0.17073	0	0	0.189703	1.61403	13.0325	0.0990857	0.0288508	-0.291621	0.0957663	-0.130267	-0.0345003	-0.0345003	0.275564	0.17073	6.31705	381052	78451	0.724436	0.275564
2009	58	SC Firm 58	1	US	1	MAN	3000	CGOODS	1	0.180726	0.0726537	0	0	0.270845	2.4875	13.1294	0.0727929	0.0592992	-2.77553	-0.0592886	0.0349906	-0.0242979	-0.0242979	0.180726	0.0726537	12.2193	753991	59072	0.819274	0.180726
2010	58	SC Firm 58	1	US	1	MAN	3000	CGOODS	1	0.201918	0.0717957	0	0	0.294001	2.8124	13.362	0.04644	0.0212627	2.53192	0.0699716	0.0307887	0.10076	0.10076	0.201918	0.0717957	18.5422	1168702	90398	0.798082	0.201918
2011	58	SC Firm 58	1	US	1	MAN	3000	CGOODS	1	0.257758	0.100031	0	0	0.260709	2.57677	13.7836	0.0493712	0.0209754	1.60145	0.116464	0.0316653	0.148129	0.148129	0.257758	0.100031	23	1483673	164910	0.742242	0.257758
2012	58	SC Firm 58	1	US	1	MAN	3000	CGOODS	1	0.214345	0.0812118	0	0	0.248806	2.63934	14.0201	0.0563219	0.00630709	2.32108	0.00924333	0.0462602	0.0555035	0.0555035	0.214345	0.0812118	28.18	1949788	172342	0.785655	0.220709
2013	58	SC Firm 58	1	US	1	MAN	3000	CGOODS	1	0.214146	0.0710697	0	0	0.245119	3.01318	14.0888	0.0643074	0.00191542	2.21931	0.0183563	-0.0817537	-0.0633974	-0.0633974	0.214146	0.0710697	36.59	2463824	188500	0.785854	0.229169
2014	58	SC Firm 58	1	US	1	MAN	3000	CGOODS	1	0.238439	0.096891	0	0	0.200518	2.4609	14.1044	0.0756172	0.0328112	2.3882	0.0315769	-0.12032	-0.0887433	-0.0887433	0.238439	0.096891	31.83	2025184	217274	0.761561	0.265552
2004	59	SC Firm 59	1	US	1	MAN	1000	BMAT	1	0.303124	0.181461	0.240226	0.13878	0.134976	1.67046	13.0115	0.584012	0.0290155	3.78574	0.0251961	0.00742294	0.0326191	0.0326191	0.303124	0.181461	11.26	1018283	225742	0.696876	0.0911741
2005	59	SC Firm 59	1	US	1	MAN	1000	BMAT	1	0.308542	0.174536	0.220857	0.118413	0.0992436	1.76778	13.1372	0.617083	0.0483088	3.34522	-0.00435508	-0.00865609	-0.0130112	-0.0130112	0.308542	0.174536	11.57	1052778	222600	0.691458	0.119905
2006	59	SC Firm 59	1	US	1	MAN	1000	BMAT	1	0.31534	0.172579	0.201575	0.1026	0.120557	1.82722	13.3936	0.608881	0.0143163	2.66663	0.0209041	0.0143289	0.0352331	0.0352331	0.31534	0.172579	12.49	1143018	238404	0.68466	0.149183
2007	59	SC Firm 59	1	US	1	MAN	1000	BMAT	1	0.297698	0.198022	0.197605	0.125455	0.0899324	1.50336	13.4196	0.62814	0.0222165	1.77857	-0.0243096	0.0251754	0.000865787	0.000865787	0.297698	0.198022	9.66	892633	220406	0.702302	0.130953
2006	60	SC Firm 60	1	US	0	SERV	4000	HCARE	1	0.286493	0.0696461	0.00351895	0.000657948	0.245225	4.11355	15.454	0.20474	0.000179613	2.66663	-0.00161735	0.0345262	0.0329088	0.0329088	0.286493	0.0696461	55.11	22479369	1682800	0.713507	0.283973
2007	60	SC Firm 60	1	US	0	SERV	4000	HCARE	1	0.268629	0.0604398	0.00311382	0.000546755	0.23031	4.44458	15.6074	0.174694	0.00677954	1.77857	0.0398015	0.0426027	0.0824041	0.0824041	0.268629	0.0604398	74.72	30709920	1975500	0.731371	0.266345
2008	60	SC Firm 60	1	US	0	SERV	4000	HCARE	1	0.288901	0.121812	0.00377727	0.00129283	0.25535	2.3717	15.7203	0.162956	0.0169085	-0.291621	0.0290795	0.000447174	0.0295267	0.0295267	0.288901	0.121812	39.95	15836180	2196600	0.711099	0.286205
2009	60	SC Firm 60	1	US	0	SERV	4000	HCARE	1	0.272971	0.109963	0.00272187	0.000897298	0.220894	2.48238	15.7211	0.135923	0.0183508	-2.77553	0.0308225	0.0198979	0.0507204	0.0507204	0.272971	0.109963	50.37	20042223	2476200	0.727029	0.270987
2005	61	SC Firm 61	1	US	1	MAN	9000	TECH	1	0.331804	0.176936	0.196888	0.0959492	0.0115968	1.87528	13.8596	0.22653	0.0831526	3.34522	-0.0924499	0.00992294	-0.0825269	-0.0825269	0.331804	0.176936	14.57	2870450	617066	0.668196	0.167991
2006	61	SC Firm 61	1	US	1	MAN	9000	TECH	1	0.209097	0.112932	0	0	0.13871	1.85153	14.1202	0.212382	0.0939704	2.66663	-0.149442	-0.00571684	-0.155159	-0.155159	0.209097	0.112932	14.96	2826722	359868	0.790903	0.209097
2007	61	SC Firm 61	1	US	1	MAN	9000	TECH	1	0.209681	0.15413	0	0	0.0773985	1.36042	13.9129	0.226779	0.0423174	1.77857	-0.0217027	-0.0355407	-0.0572434	-0.0572434	0.209681	0.15413	10.34	1789730	326114	0.790319	0.209681
2004	62	SC Firm 62	1	US	1	MAN	9000	TECH	1	0.196086	0.0702479	0.0281116	0.00888025	0.220688	2.79134	16.2624	0.232775	0.0501549	3.78574	-0.0239892	-0.0323333	-0.0563225	-0.0563225	0.196086	0.0702479	24.62	42299994	3196000	0.803914	0.175287
2005	62	SC Firm 62	1	US	1	MAN	9000	TECH	1	0.206001	0.0571396	0.0500397	0.0121545	0.271261	3.60523	16.328	0.247627	0.0350963	3.34522	-0.00617407	-0.208	-0.214174	-0.214174	0.206001	0.0571396	32.07	51202635	3103000	0.793999	0.165704
2006	62	SC Firm 62	1	US	1	MAN	9000	TECH	1	0.182843	0.0574841	0.00376335	0.00102861	0.329361	3.18075	16.4726	0.283561	0.0507859	2.66663	-0.0399139	-0.208	-0.247914	-0.247914	0.182843	0.0574841	28.8	41760871	2547000	0.817157	0.181407
2007	62	SC Firm 62	1	US	1	MAN	9000	TECH	1	0.208652	0.0556348	0	0	0.364648	3.75039	16.4427	0.284914	0.0272012	1.77857	0.00757875	-0.208	-0.200422	-0.200422	0.208652	0.0556348	33.4	44863241	2643000	0.791348	0.212521
2008	62	SC Firm 62	1	US	1	MAN	9000	TECH	1	0.212866	0.113451	0	0	0.314518	1.87628	16.3413	0.277111	0.0385222	-0.291621	-0.00880651	-0.169337	-0.178143	-0.178143	0.212866	0.113451	15.52	19832944	2538000	0.787134	0.217814
2009	62	SC Firm 62	1	US	1	MAN	9000	TECH	1	0.19226	0.0672488	0	0	0.258107	2.85894	16.1599	0.260583	0.0310544	-2.77553	-0.0171631	-0.0407624	-0.0579256	-0.0579256	0.19226	0.0672488	26.06	32317476	2330000	0.80774	0.197789
2010	62	SC Firm 62	1	US	1	MAN	9000	TECH	1	0.21476	0.0705048	0	0	0.396687	3.04604	16.4521	0.274606	0.103787	2.53192	0.0408925	-0.141407	-0.100515	-0.100515	0.21476	0.0705048	32.5	37941920	2878000	0.78524	0.221178
2004	63	SC Firm 63	1	US	1	MAN	3000	CGOODS	1	0.329121	0.123017	0	0	0.220243	2.67541	14.5984	0.129509	0.0034747	3.78574	0.0745673	0.00327176	0.0778391	0.0778391	0.329121	0.123017	36.4113	1789246	250983	0.670879	0.329121
2005	63	SC Firm 63	1	US	1	MAN	3000	CGOODS	1	0.30531	0.113856	0	0	0.225841	2.68155	14.7548	0.163708	0.00287569	3.34522	0.011382	-0.00487063	0.00651135	0.00651135	0.30531	0.113856	39.3793	2029054	260702	0.69469	0.30531
2006	63	SC Firm 63	1	US	1	MAN	3000	CGOODS	1	0.299882	0.112113	0	0	0.259403	2.67481	14.936	0.156724	0.0227696	2.66663	0.0404061	-0.0422066	-0.00180049	-0.00180049	0.299882	0.112113	43.2317	2386149	301299	0.700118	0.303442
2007	63	SC Firm 63	1	US	1	MAN	3000	CGOODS	1	0.273395	0.112349	0	0	0.187453	2.43344	14.865	0.14844	0.0502734	1.77857	-0.0110385	0.00269802	-0.00834044	-0.00834044	0.273395	0.112349	37.3548	2288129	289606	0.726605	0.276566
2008	63	SC Firm 63	1	US	1	MAN	3000	CGOODS	1	0.296779	0.213777	0	0	0.165026	1.38826	14.7865	0.153759	0.018653	-0.291621	0.00617423	-0.0171459	-0.0109717	-0.0109717	0.296779	0.213777	12.9528	1087731	295759	0.703221	0.29789
2009	63	SC Firm 63	1	US	1	MAN	3000	CGOODS	1	0.258737	0.156578	0	0	0.043928	1.65245	14.2355	0.150202	0.0835761	-2.77553	-0.0522203	0.00274412	-0.0494762	-0.0494762	0.258737	0.156578	30.8587	1325592	246091	0.741263	0.258737
2010	63	SC Firm 63	1	US	1	MAN	3000	CGOODS	1	0.318228	0.176371	0	0	0.178834	1.80431	14.6382	0.144367	0.0957138	2.53192	0.0629662	-0.119712	-0.0567457	-0.0567457	0.318228	0.176371	33.3746	1432688	306795	0.681772	0.318228
2011	63	SC Firm 63	1	US	1	MAN	3000	CGOODS	1	0.281233	0.196138	0	0	0.12896	1.43386	14.6659	0.140404	0.0397336	1.60145	0.0251588	0.100087	0.125246	0.125246	0.281233	0.196138	26.9572	1380923	336937	0.718767	0.301982
2012	63	SC Firm 63	1	US	1	MAN	3000	CGOODS	1	0.298694	0.196275	0	0	0.15017	1.52182	14.7862	0.13225	0.0149591	2.32108	0.0276384	-0.0633834	-0.035745	-0.035745	0.298694	0.196275	36.7848	1520406	371293	0.701306	0.315535
2013	63	SC Firm 63	1	US	1	MAN	3000	CGOODS	1	0.314013	0.126705	0	0	0.185457	2.4783	14.9916	0.108268	0.0258589	2.21931	0.0344817	0.00319062	0.0376724	0.0376724	0.314013	0.126705	55.23	2874756	417094	0.685987	0.327987
2014	63	SC Firm 63	1	US	1	MAN	3000	CGOODS	1	0.292204	0.127185	0	0	0.197198	2.29748	15.0755	0.120579	0.00863624	2.3882	-0.00387657	0.00654709	0.00267051	0.00267051	0.292204	0.127185	55.87	2824866	411633	0.707796	0.305967
2004	64	SC Firm 64	1	US	1	MAN	2000	IND	1	0.223274	0.0564585	0.00632301	0.00132282	0.222252	3.95467	13.9869	0.205613	0.0230542	3.78574	0.0827392	0.0402834	0.123023	0.123023	0.223274	0.0564585	24.3	4783431	286225	0.776726	0.320603
2005	64	SC Firm 64	1	US	1	MAN	2000	IND	1	0.218759	0.0732627	0.00508447	0.00144072	0.309878	2.98596	14.2873	0.189935	0.0323628	3.34522	0.015892	-0.0316196	-0.0157276	-0.0157276	0.218759	0.0732627	19.79	3904231	308647	0.781241	0.278186
2006	64	SC Firm 64	1	US	1	MAN	2000	IND	1	0.209187	0.0617261	0.00521953	0.00130321	0.30435	3.38896	14.3961	0.166023	0.010601	2.66663	0.0203244	-0.003557	0.0167674	0.0167674	0.209187	0.0617261	26.39	5196508	341862	0.790813	0.250942
2005	65	SC Firm 65	1	US	1	MAN	2000	IND	1	0.223703	0.0799381	0.0011238	0.000339096	0.193803	2.79845	13.5605	0.0574145	0.0270274	3.34522	-0.0136606	0.0193867	0.00572611	0.00572611	0.223703	0.0799381	8.8725	1913266	166231	0.776297	0.230368
2006	65	SC Firm 65	1	US	1	MAN	2000	IND	1	0.217777	0.0702709	0.000624855	0.000169712	0.166835	3.09911	13.7538	0.0488044	0.0214914	2.66663	0.0487536	0.0902746	0.139028	0.139028	0.217777	0.0702709	12.6825	2833727	214179	0.782223	0.239285
2007	65	SC Firm 65	1	US	1	MAN	2000	IND	1	0.248425	0.0929503	0.0498426	0.0160028	0.157458	2.67267	14.0162	0.0334191	0.0130776	1.77857	0.10929	0.175574	0.284864	0.284864	0.248425	0.0929503	15.12	3731781	382416	0.751575	0.240128
2008	65	SC Firm 65	1	US	1	MAN	2000	IND	1	0.276699	0.129713	0.113617	0.0475656	0.155481	2.13316	14.1001	0.0306878	0.00342212	-0.291621	0.0428081	-0.00837851	0.0344296	0.0344296	0.276699	0.129713	12.6	3035340	452408	0.723301	0.2098
2005	66	SC Firm 66	1	US	1	MAN	3000	CGOODS	1	0.257881	0.0286875	0.0525913	0.00469592	0.206248	7.29543	12.5463	0.102437	0.0373968	3.34522	-0.181278	0.410394	0.229116	0.229116	0.257881	0.0286875	0	1778479	52527	0.742119	0.218306
2006	66	SC Firm 66	1	US	1	MAN	3000	CGOODS	1	0.259116	0.0301513	0.0283578	0.00258761	0.229873	7.29543	12.9731	0.103408	0.0147705	2.66663	0.0775932	0.0861153	0.163708	0.163708	0.259116	0.0301513	0	2411808	74980	0.740884	0.237493
2007	66	SC Firm 66	1	US	1	MAN	3000	CGOODS	1	0.281936	0.0485326	0.0486132	0.0065944	0.25771	5.80921	13.3156	0.133974	0.0170749	1.77857	0.0899816	0.0376101	0.127592	0.127592	0.281936	0.0485326	0	2159026	110128	0.718064	0.245245
2008	66	SC Firm 66	1	US	1	MAN	3000	CGOODS	1	0.320903	0.117463	0.121031	0.0373356	0.201259	2.73196	13.4943	0.150851	0.0445959	-0.291621	0.0950252	0.0253982	0.120423	0.120423	0.320903	0.117463	0	1175521	156458	0.679097	0.227394
2009	66	SC Firm 66	1	US	1	MAN	3000	CGOODS	1	0.266852	0.0960462	0.0481248	0.0145439	0.20615	2.77837	13.6605	0.133665	0.00104756	-2.77553	-0.019918	0.0416486	0.0217307	0.0217307	0.266852	0.0960462	0	1370253	145591	0.733148	0.229785
2010	66	SC Firm 66	1	US	1	MAN	3000	CGOODS	1	0.264166	0.0597886	0.0310816	0.00565003	0.211815	4.41833	13.8775	0.112718	0.00711568	2.53192	0.0485965	0.0431403	0.0917368	0.0917368	0.264166	0.0597886	0	2805634	178412	0.735834	0.240562
2011	66	SC Firm 66	1	US	1	MAN	3000	CGOODS	1	0.307632	0.0691834	0.108833	0.02002	0.215802	4.44661	14.2026	0.173121	0.00757595	1.60145	0.113539	0.0471307	0.160669	0.160669	0.307632	0.0691834	0	3804592	282778	0.692368	0.223076
2012	66	SC Firm 66	1	US	1	MAN	3000	CGOODS	1	0.293982	0.0620454	0.0704236	0.0118922	0.217596	4.73817	14.4225	0.156298	0.00232661	2.32108	0.0495928	0.0462136	0.0958064	0.0958064	0.293982	0.0620454	0	5142292	340161	0.706018	0.240494
2013	66	SC Firm 66	1	US	1	MAN	3000	CGOODS	1	0.332366	0.0537173	0.126773	0.0162848	0.200063	6.18731	14.6623	0.141945	0.00872517	2.21931	0.116766	0.048025	0.164791	0.164791	0.332366	0.0537173	0	9237593	524387	0.667634	0.23544
2004	67	SC Firm 67	1	US	0	SERV	5000	CSERV	1	0.277428	0.0331702	0	0	0.320007	7.29543	13.6265	0.346322	0.0400364	3.78574	0.107903	0.0388461	0.146749	0.146749	0.277428	0.0331702	25.31	4501548	154440	0.722572	0.277428
2005	67	SC Firm 67	1	US	0	SERV	5000	CSERV	1	0.270832	0.0492027	0	0	0.318223	5.50441	13.9036	0.389091	0.00247508	3.34522	0.0700528	0.0361932	0.106246	0.106246	0.270832	0.0492027	23.03	4025694	208325	0.729168	0.270832
2006	67	SC Firm 67	1	US	0	SERV	5000	CSERV	1	0.249061	0.0444293	0	0	0.242295	5.60578	14.0182	0.495632	0.0619821	2.66663	0.0173956	-0.002005	0.0153906	0.0153906	0.249061	0.0444293	27.26	4817034	223968	0.750939	0.249061
2007	67	SC Firm 67	1	US	0	SERV	5000	CSERV	1	0.253205	0.0996998	0	0	0.256987	2.53967	14.2261	0.427803	0.0102364	1.77857	0.0572213	0.0162488	0.0734701	0.0734701	0.253205	0.0996998	14.98	2612954	289360	0.746795	0.253205
2008	67	SC Firm 67	1	US	0	SERV	5000	CSERV	1	0.207097	0.0491786	0	0	0.28513	4.21112	14.4223	0.380289	0.0201304	-0.291621	-0.010629	0.000737392	-0.00989158	-0.00989158	0.207097	0.0491786	34.99	5321388	275234	0.792903	0.207097
2009	67	SC Firm 67	1	US	0	SERV	5000	CSERV	1	0.207395	0.0575137	0	0	0.259845	3.60602	14.4771	0.330031	0.0128098	-2.77553	0.0391689	0.0141233	0.0532922	0.0532922	0.207395	0.0575137	35.81	5560462	339318	0.792605	0.207395
2010	67	SC Firm 67	1	US	0	SERV	5000	CSERV	1	0.213325	0.0908003	0	0	0.282339	2.34938	14.6371	0.326779	0.016723	2.53192	0.0242181	-0.0881587	-0.0639406	-0.0639406	0.213325	0.0908003	27.56	3832775	382773	0.786675	0.213325
2011	67	SC Firm 67	1	US	0	SERV	5000	CSERV	1	0.281349	0.0626137	0	0	0.259798	4.49341	14.7213	0.461667	0.0275348	1.60145	0.0233651	-0.0194479	0.00391721	0.00391721	0.281349	0.0626137	39.36	6249475	417440	0.718651	0.281349
2012	67	SC Firm 67	1	US	0	SERV	5000	CSERV	1	0.246283	0.0773918	0	0	0.274286	3.18229	14.8433	0.408086	0.0115667	2.32108	0.0140123	0.0283806	0.0423929	0.0423929	0.246283	0.0773918	37.1	5276629	442623	0.753717	0.246283
2013	67	SC Firm 67	1	US	0	SERV	5000	CSERV	1	0.237277	0.103823	0	0	0.251887	2.28541	14.9426	0.363274	0.0113828	2.21931	0.0380067	0.0257616	0.0637683	0.0637683	0.237277	0.103823	35.13	4549330	527044	0.762723	0.237277
2011	68	SC Firm 68	1	US	1	MAN	9000	TECH	1	0.290906	0.110268	0.00424243	0.00128541	0.294229	2.63819	14.405	0.168394	0.0806126	1.60145	-0.100113	-0.187084	-0.287197	-0.287197	0.290906	0.110268	8.1	3583351	444097	0.709094	0.287923
2012	68	SC Firm 68	1	US	1	MAN	9000	TECH	1	0.304728	0.134655	0.00558916	0.00199155	0.113123	2.26302	14.1747	0.154195	0.129833	2.32108	-0.00506441	-0.0810934	-0.0861578	-0.0861578	0.304728	0.134655	6.55	2807284	436837	0.695272	0.30086
2013	68	SC Firm 68	1	US	1	MAN	9000	TECH	1	0.306537	0.110695	0.00741848	0.00210018	0.10746	2.76919	14.1423	0.136769	0.00531047	2.21931	-0.0164418	-0.0271448	-0.0435866	-0.0435866	0.306537	0.110695	7.83	3330804	414599	0.693463	0.301354
2004	69	SC Firm 69	1	US	1	MAN	9000	TECH	1	0.250284	0.133584	0	0	0.122651	1.87361	12.754	0.110256	0.007029	3.78574	0.019127	0.013594	0.0327209	0.0327209	0.250284	0.133584	26.73	489961	75542	0.749716	0.250284
2005	69	SC Firm 69	1	US	1	MAN	9000	TECH	1	0.27527	0.112293	0	0	0.130538	2.45136	12.9804	0.127196	0.00869248	3.34522	0.0673401	0.0371589	0.104499	0.104499	0.27527	0.112293	29.81	790584	100007	0.72473	0.27527
2006	69	SC Firm 69	1	US	1	MAN	9000	TECH	1	0.279258	0.121156	0	0	0.122195	2.30495	13.155	0.106342	0.00451655	2.66663	0.0726063	0.114335	0.186941	0.186941	0.279258	0.121156	34.43	980310	135144	0.720742	0.279258
2007	69	SC Firm 69	1	US	1	MAN	9000	TECH	1	0.266659	0.182333	0	0	0.124233	1.46248	13.2615	0.11739	0.00329292	1.77857	0.0214301	0.0402363	0.0616664	0.0616664	0.266659	0.182333	24.08	659009	146954	0.733341	0.266659
2008	69	SC Firm 69	1	US	1	MAN	9000	TECH	1	0.263578	0.188214	0	0	0.115207	1.40042	13.3506	0.27326	0.00481278	-0.291621	0.0276751	0.0261292	0.0538044	0.0538044	0.263578	0.188214	31.78	708185	164194	0.736422	0.263578
2004	70	SC Firm 70	1	US	1	MAN	2000	IND	1	0.262361	0.108837	0.00455585	0.00156904	0.191945	2.41059	15.4349	0.271064	0.00638506	3.78574	-0.0150991	0.00414191	-0.0109572	-0.0109572	0.262361	0.108837	66.62	6035601	737121	0.737639	0.26058
2005	70	SC Firm 70	1	US	1	MAN	2000	IND	1	0.261244	0.112913	0.00411411	0.00148475	0.201991	2.31367	15.5251	0.247955	0.00708224	3.34522	0.0240691	-0.0129083	0.0111608	0.0111608	0.261244	0.112913	71.1	6378782	811926	0.738756	0.260451
2006	70	SC Firm 70	1	US	1	MAN	2000	IND	1	0.283064	0.127892	0.00432446	0.00161058	0.2287	2.21331	15.5877	0.260313	0.016112	2.66663	0.0165169	-0.130544	-0.114027	-0.114027	0.283064	0.127892	69.94	5879690	862238	0.716936	0.281997
2007	70	SC Firm 70	1	US	1	MAN	2000	IND	1	0.315186	0.122983	0.0500117	0.0157865	0.25942	2.56283	15.6746	0.283884	0.0190794	1.77857	0.0365074	-0.12097	-0.0844624	-0.0844624	0.315186	0.122983	87.52	6954288	975193	0.684814	0.285833
2006	71	SC Firm 71	1	US	1	MAN	2000	IND	1	0.260859	0.12371	0.0711208	0.0297177	0.198742	2.10863	14.3872	0.0298592	0.0125862	2.66663	-0.0481173	0.0138323	-0.034285	-0.034285	0.260859	0.12371	47.16	1312596	185306	0.739141	0.216479
2007	71	SC Firm 71	1	US	1	MAN	2000	IND	1	0.245838	0.152079	0.0890739	0.0510552	0.156742	1.61651	14.3797	0.0358666	0.0299912	1.77857	-0.00119982	0.0157483	0.0145485	0.0145485	0.245838	0.152079	36.76	1028158	184406	0.754162	0.19309
2008	71	SC Firm 71	1	US	1	MAN	2000	IND	1	0.179603	0.105735	0.0345946	0.0189862	0.147584	1.69861	14.3463	0.0338086	0.00740629	-0.291621	-0.0779249	0.0149834	-0.0629416	-0.0629416	0.179603	0.105735	38.4	1087704	128607	0.820397	0.173658
2011	72	SC Firm 72	1	US	0	SERV	5000	CSERV	1	0.303063	0.0963477	0.00595007	0.00146547	0.196696	3.14552	16.1288	0.465326	0.0118866	1.60145	-0.0728114	0.0806416	0.00783025	0.00783025	0.303063	0.0963477	34.79	12200025	1300770	0.696937	0.298892
2012	72	SC Firm 72	1	US	0	SERV	5000	CSERV	1	0.281769	0.0762913	0.00630378	0.00133376	0.201267	3.69333	16.275	0.414166	0.00892081	2.32108	0.0360728	0.0846637	0.120736	0.120736	0.281769	0.0762913	45.58	18061564	1491747	0.718231	0.277213
2013	72	SC Firm 72	1	US	0	SERV	5000	CSERV	1	0.299747	0.0709945	0.00691421	0.00124143	0.222824	4.22212	16.3741	0.438425	0.0135702	2.21931	0.0303815	0.00793861	0.0383202	0.0383202	0.299747	0.0709945	57.83	21722092	1660000	0.700253	0.294872
2004	73	SC Firm 73	1	US	1	MAN	9000	TECH	1	0.222373	0.0376743	0.0950906	0.0141821	0.108913	5.90251	15.0893	0.0579303	0.0178036	3.78574	0.059401	0.20285	0.262251	0.262251	0.222373	0.0376743	37.68	52133445	2040984	0.777627	0.144555
2005	73	SC Firm 73	1	US	1	MAN	9000	TECH	1	0.186658	0.034826	0.0784515	0.0132079	0.13893	5.35972	15.4752	0.0643956	0.0192631	3.34522	-0.00176701	-0.0206297	-0.0223967	-0.0223967	0.186658	0.034826	39.18	56033747	2021844	0.813342	0.139905
2006	73	SC Firm 73	1	US	1	MAN	9000	TECH	1	0.202699	0.0629488	0.0755222	0.0211299	0.128641	3.22006	15.6758	0.0956589	0.0145235	2.66663	0.027094	-0.0331405	-0.0060465	-0.0060465	0.202699	0.0629488	25.54	34740708	2333794	0.797301	0.139234
2007	73	SC Firm 73	1	US	1	MAN	9000	TECH	1	0.19918	0.0729514	0.0710989	0.0236441	0.110763	2.73031	15.757	0.108885	0.0175815	1.77857	0.00835038	-0.00754668	0.000803696	0.000803696	0.19918	0.0729514	23.26	30955059	2435917	0.80082	0.159225
2008	73	SC Firm 73	1	US	1	MAN	9000	TECH	1	0.17318	0.122536	0.00378453	0.00252643	0.102075	1.4133	15.7908	0.112213	0.00883683	-0.291621	-0.00475593	0.0873756	0.0826197	0.0826197	0.17318	0.122536	12.2	16977032	2370809	0.82682	0.175013
2009	73	SC Firm 73	1	US	1	MAN	9000	TECH	1	0.159563	0.0917435	0.00341384	0.00181919	0.0838541	1.73923	15.6812	0.0955315	0.00705629	-2.77553	0.000832082	0.293722	0.294554	0.294554	0.159563	0.0917435	16.78	23593939	2383237	0.840437	0.160666
2010	73	SC Firm 73	1	US	1	MAN	9000	TECH	1	0.145428	0.0906953	0.0031257	0.00183436	0.105036	1.60348	15.66	0.110759	0.0176283	2.53192	-0.0142197	-0.00928926	-0.0235089	-0.0235089	0.145428	0.0906953	16.63	21765943	2170964	0.854572	0.15608
2011	73	SC Firm 73	1	US	1	MAN	9000	TECH	1	0.0964761	0.0691618	0.00999925	0.00697916	0.105325	1.39493	15.4218	0.117088	0.00152586	1.60145	-0.0503815	0.00742911	-0.0429524	-0.0429524	0.0964761	0.0691618	16.13	19194797	1426185	0.903524	0.142518
2012	73	SC Firm 73	1	US	1	MAN	9000	TECH	1	0.109206	0.0776272	0.00242266	0.00166441	0.0851966	1.4068	15.4223	0.0985687	0.0102892	2.32108	0.0258195	-0.086609	-0.0607895	-0.0607895	0.109206	0.0776272	19.9	22193137	1867782	0.890794	0.146525
2013	73	SC Firm 73	1	US	1	MAN	9000	TECH	1	0.171503	0.0656485	0.0765769	0.0273764	0.0718111	2.61244	15.3589	0.0885761	0.00888858	2.21931	0.0603579	0.0126406	0.0729985	0.0729985	0.171503	0.0656485	40.44	41019829	2882094	0.828497	0.153256
2004	74	SC Firm 74	1	US	1	MAN	2000	IND	1	0.0846403	0.0244462	0.000214221	4.23038e-05	0.209906	4.76231	13.4046	0.0536788	0.00565346	3.78574	0.0176034	0.0287513	0.0463547	0.0463547	0.0846403	0.0244462	56.28	4042019	64151	0.91536	0.0775952
2005	74	SC Firm 74	1	US	1	MAN	2000	IND	1	0.0846403	0.0244462	0	0	0.175459	3.35281	13.4621	0.0540529	0.0243969	3.34522	-0.00403739	-0.0142234	-0.0182608	-0.0182608	0.0846403	0.0244462	42.85	3018831	60443	0.91536	0.0775952
2006	74	SC Firm 74	1	US	1	MAN	2000	IND	1	0.0887315	0.0344593	0	0	0.168668	2.57497	13.5404	0.0596288	0.0065235	2.66663	0.0259754	-0.0531978	-0.0272224	-0.0272224	0.0887315	0.0344593	34.79	2394597	85461	0.911269	0.0887315
2007	74	SC Firm 74	1	US	1	MAN	2000	IND	1	0.127224	0.0540472	0	0	0.166242	2.35394	13.6743	0.0654428	0.00829717	1.77857	0.0445954	-0.0822806	-0.0376852	-0.0376852	0.127224	0.0540472	34.7	2303048	131585	0.872776	0.127224
2008	74	SC Firm 74	1	US	1	MAN	2000	IND	1	0.1647	0.102054	0	0	0.229812	1.61386	13.7919	0.0885709	0.0312812	-0.291621	0.0100543	-0.180442	-0.170388	-0.170388	0.1647	0.102054	20.26	1233056	140140	0.8353	0.1647
2009	74	SC Firm 74	1	US	1	MAN	2000	IND	1	0.142508	0.0668005	0	0	0.136179	2.13334	13.5124	0.0934268	0.0621699	-2.77553	-0.0262379	-0.0550441	-0.081282	-0.081282	0.142508	0.0668005	28.35	1653343	118350	0.857492	0.142508
2010	74	SC Firm 74	1	US	1	MAN	2000	IND	1	0.169346	0.0657006	0	0	0.205497	2.57754	13.7039	0.0990972	0.0519289	2.53192	0.0346834	-0.0954357	-0.0607523	-0.0607523	0.169346	0.0657006	37.99	2116473	148832	0.830654	0.169346
2011	74	SC Firm 74	1	US	1	MAN	2000	IND	1	0.135796	0.0614694	0	0	0.231452	2.20916	13.7989	0.108811	0.0245859	1.60145	-0.0297562	-0.142101	-0.171858	-0.171858	0.135796	0.0614694	35.78	1863965	122081	0.864204	0.135796
2012	74	SC Firm 74	1	US	1	MAN	2000	IND	1	0.114437	0.0524378	0	0	0.2105	2.18233	13.8117	0.104727	0.0150653	2.32108	-0.0117128	-0.0442543	-0.055967	-0.055967	0.114437	0.0524378	39.31	2001204	110746	0.885563	0.114437
2013	74	SC Firm 74	1	US	1	MAN	2000	IND	1	0.121147	0.0474581	0	0	0.181239	2.55272	13.853	0.0978629	0.0218395	2.21931	0.0222502	-0.00643858	0.0158116	0.0158116	0.121147	0.0474581	54.08	2722903	135662	0.878853	0.143912
2004	75	SC Firm 75	1	US	0	SERV	4000	HCARE	1	0.307787	0.08183	0.141815	0.0320605	0.180072	3.7613	14.9077	0.11035	0.0305587	3.78574	-0.0455974	0.0451936	-0.000403828	-0.000403828	0.307787	0.08183	80.12	19669460	1753000	0.692213	0.193398
2005	75	SC Firm 75	1	US	0	SERV	4000	HCARE	1	0.181601	0.0585384	0.017127	0.0048591	0.226725	3.10224	15.0052	0.123875	0.032549	3.34522	-0.124766	0.00136318	-0.123403	-0.123403	0.181601	0.0585384	67.44	16711632	1039100	0.818399	0.16734
2006	75	SC Firm 75	1	US	0	SERV	4000	HCARE	1	0.176403	0.0537313	0.0198402	0.00533763	0.229094	3.28306	15.067	0.135093	0.00126008	2.66663	0.00247724	-0.0998929	-0.0974156	-0.0974156	0.176403	0.0537313	78.38	18560384	1053900	0.823597	0.159732
2007	75	SC Firm 75	1	US	0	SERV	4000	HCARE	1	0.178498	0.0713725	0.0187796	0.00672442	0.234002	2.50093	15.1758	0.146509	0.00231756	1.77857	0.0196271	-0.0360734	-0.0164463	-0.0164463	0.178498	0.0713725	66.15	15406335	1184100	0.821502	0.162775
2008	75	SC Firm 75	1	US	0	SERV	4000	HCARE	1	0.219464	0.149502	0.0752979	0.0484417	0.198038	1.46797	15.2316	0.174624	0.0277856	-0.291621	0.0558917	-0.0895013	-0.0336096	-0.0336096	0.219464	0.149502	40.42	9037912	1588700	0.780536	0.155906
2009	75	SC Firm 75	1	US	0	SERV	4000	HCARE	1	0.275743	0.151002	0.166649	0.0854381	0.193244	1.82609	15.2254	0.15692	0.00716231	-2.77553	0.0716845	-0.0935842	-0.0218997	-0.0218997	0.275743	0.151002	59.11	12070262	2146800	0.724257	0.13091
2010	75	SC Firm 75	1	US	0	SERV	4000	HCARE	1	0.278578	0.175089	0.165201	0.0981025	0.186952	1.59107	15.2554	0.151727	0.003875	2.53192	0.0102251	-0.0580382	-0.0478131	-0.0478131	0.278578	0.175089	53.68	10499808	2228600	0.721422	0.135814
2008	76	SC Firm 76	1	US	0	SERV	5000	CSERV	1	0.297127	0.186527	0	0	0.198999	1.59294	15.7907	0.269027	0.0425245	-0.291621	-0.00325053	0.00315566	-9.48735e-05	-9.48735e-05	0.297127	0.186527	38.61	5531631	1268389	0.702873	0.297127
2009	76	SC Firm 76	1	US	0	SERV	5000	CSERV	1	0.290991	0.120532	0	0	0.226104	2.41423	15.8733	0.217248	0.0229683	-2.77553	0.0448042	0.0101739	0.054978	0.054978	0.290991	0.120532	49.15	10939186	1499226	0.709009	0.290991
2010	76	SC Firm 76	1	US	0	SERV	5000	CSERV	1	0.303662	0.124632	0	0	0.260756	2.43647	15.9855	0.197708	0.0267665	2.53192	0.0381333	-0.0907829	-0.0526496	-0.0526496	0.303662	0.124632	57.97	12042218	1714534	0.696338	0.303662
2011	76	SC Firm 76	1	US	0	SERV	5000	CSERV	1	0.314788	0.112518	0	0	0.306093	2.79766	16.0668	0.209319	0.0323666	1.60145	0.0152823	-0.174454	-0.159171	-0.159171	0.314788	0.112518	55.91	14213330	1802018	0.685212	0.314788
2008	77	SC Firm 77	1	US	0	SERV	4000	HCARE	1	0.273251	0.144476	0.152999	0.0750434	0.199459	1.89132	15.2259	0.188083	0.0317552	-0.291621	-0.0302045	-0.0608644	-0.091069	-0.091069	0.273251	0.144476	47.63	13719631	2316891	0.726749	0.183962
2009	77	SC Firm 77	1	US	0	SERV	4000	HCARE	1	0.244357	0.124428	0.145458	0.0695975	0.20189	1.96384	15.292	0.19143	0.00486959	-2.77553	-0.0265656	-0.0583104	-0.084876	-0.084876	0.244357	0.124428	53.5	14704743	2089706	0.755643	0.14387
2010	77	SC Firm 77	1	US	0	SERV	4000	HCARE	1	0.308315	0.133975	0.176964	0.0694415	0.238461	2.30128	15.3666	0.202859	0.0303077	2.53192	0.0500873	-0.206152	-0.156065	-0.156065	0.308315	0.133975	67.05	16128073	2495037	0.691685	0.184425
2011	77	SC Firm 77	1	US	0	SERV	4000	HCARE	1	0.262493	0.0818554	0.137512	0.0384029	0.235618	3.20679	15.4346	0.173642	0.00136566	1.60145	-0.0132134	-0.0174144	-0.0306277	-0.0306277	0.262493	0.0818554	110.05	26644756	2375461	0.737507	0.172384
2012	77	SC Firm 77	1	US	0	SERV	4000	HCARE	1	0.291341	0.0785348	0.137119	0.0318926	0.217667	3.70971	15.5232	0.171985	0.0107358	2.32108	0.0568465	-0.0864137	-0.0295672	-0.0295672	0.291341	0.0785348	146.37	34628507	2951323	0.708659	0.200177
2013	77	SC Firm 77	1	US	0	SERV	4000	HCARE	1	0.253768	0.043579	0.0630696	0.00893876	0.25465	5.82318	15.7517	0.147573	0.0200881	2.21931	0.00499151	-0.0158758	-0.0108843	-0.0108843	0.253768	0.043579	279.572	66071810	3010539	0.746232	0.223138
2014	77	SC Firm 77	1	US	0	SERV	4000	HCARE	1	0.241367	0.041589	0.0509844	0.00727402	0.32169	5.80362	16.088	0.123347	0.0450575	2.3882	0.0310571	-0.0648221	-0.033765	-0.033765	0.241367	0.041589	339.45	79622410	3455115	0.758633	0.204149
2004	78	SC Firm 78	1	US	0	SERV	4000	HCARE	1	0.0861396	0.0244462	0.0506157	0.00878973	0.266435	5.58046	11.9908	0.247355	0.0031262	3.78574	0.00422172	0.0242395	0.0284613	0.0284613	0.0861396	0.0244462	38.9	1788181	28035	0.91386	0.0775952
2005	78	SC Firm 78	1	US	0	SERV	4000	HCARE	1	0.0927783	0.0244462	0.0517408	0.00817255	0.347656	6.10033	12.0932	0.301548	0.055377	3.34522	-0.00217095	0.0275111	0.0253401	0.0253401	0.0927783	0.0244462	56.08	1773809	27394	0.907222	0.0775952
2006	78	SC Firm 78	1	US	0	SERV	4000	HCARE	1	0.0846403	0.0244462	0.0379535	0.00665199	0.311617	5.49302	12.2191	0.239593	0.027053	2.66663	0.00747614	0.068014	0.0754901	0.0754901	0.0846403	0.0244462	55.45	2005066	30164	0.91536	0.0775952
2007	78	SC Firm 78	1	US	0	SERV	4000	HCARE	1	0.0846403	0.0244462	0	0	0.288336	5.00051	12.3171	0.201245	0.0140619	1.77857	-0.0285175	0.0336203	0.00510285	0.00510285	0.0846403	0.0244462	66.05	2257259	17193	0.91536	0.0775952
2008	78	SC Firm 78	1	US	0	SERV	4000	HCARE	1	0.0846403	0.0244462	0	0	0.29869	5.93426	12.4585	0.200489	0.00807746	-0.291621	0.00600352	0.00908609	0.0150896	0.0150896	0.0846403	0.0244462	64.52	2990619	20239	0.91536	0.0775952
2009	78	SC Firm 78	1	US	0	SERV	4000	HCARE	1	0.0846403	0.0244462	0	0	0.335899	5.06788	12.4835	0.212144	0.0247933	-2.77553	-0.00999142	-0.0361882	-0.0461796	-0.0461796	0.0846403	0.0244462	68.56	2376541	15523	0.91536	0.0775952
2010	78	SC Firm 78	1	US	0	SERV	4000	HCARE	1	0.0846403	0.0244462	0	0	0.316987	4.13364	12.5026	0.187735	0.0128191	2.53192	0.00289313	-0.017671	-0.0147779	-0.0147779	0.0846403	0.0244462	65.67	2127573	17024	0.91536	0.0775952
2011	78	SC Firm 78	1	US	0	SERV	4000	HCARE	1	0.0846403	0.0244462	0	0	0.282408	5.04423	12.5775	0.154448	0.0233302	1.60145	0.0018845	0.0406026	0.0424871	0.0424871	0.0846403	0.0244462	68.26	3097479	18188	0.91536	0.0775952
2012	78	SC Firm 78	1	US	0	SERV	4000	HCARE	1	0.0846403	0.0244462	0	0	0.281183	3.84843	12.6589	0.130384	0.00316147	2.32108	0.0244146	0.0505669	0.0749815	0.0749815	0.0846403	0.0244462	68.34	2732516	35750	0.91536	0.0775952
2013	78	SC Firm 78	1	US	0	SERV	4000	HCARE	1	0.0846403	0.0244462	0	0	0.220277	3.31144	12.6462	0.139772	0.0420091	2.21931	-0.00471149	-0.00621644	-0.0109279	-0.0109279	0.0846403	0.0244462	94.67	2544540	32084	0.91536	0.0775952
2014	78	SC Firm 78	1	US	0	SERV	4000	HCARE	1	0.0846403	0.0244462	0.0153744	0.0037653	0.210057	4.01011	12.7876	0.135793	0.0117504	2.3882	0.0015119	0.0203306	0.0218425	0.0218425	0.0846403	0.0244462	92.4	3425294	33388	0.91536	0.0775952
2004	79	SC Firm 79	1	US	1	MAN	9000	TECH	1	0.180917	0.0466536	0	0	0.155621	3.87787	14.6912	0.037133	0.129833	3.78574	-0.00198244	0.410394	0.408412	0.408412	0.180917	0.0466536	21.52	10668816	522096	0.819083	0.180917
2005	79	SC Firm 79	1	US	1	MAN	9000	TECH	1	0.163006	0.035783	0	0	0.1365	4.55541	14.7979	0.0257017	0.00396768	3.34522	0.0238623	0.109199	0.133061	0.133061	0.163006	0.035783	31.4333	16481155	611632	0.836994	0.163006
2006	79	SC Firm 79	1	US	1	MAN	9000	TECH	1	0.140482	0.0372314	0	0	0.0633381	3.77322	15.1151	0.0337722	0.0475199	2.66663	0.0150649	0.137808	0.152873	0.152873	0.140482	0.0372314	32.31	17716025	685100	0.859518	0.140482
2007	79	SC Firm 79	1	US	1	MAN	9000	TECH	1	0.165774	0.0540244	0	0	0.0343159	3.06849	15.1443	0.049978	0.021187	1.77857	0.0241712	-0.0772181	-0.0530469	-0.0530469	0.165774	0.0540244	26.14	14043924	802045	0.834226	0.165774
2008	79	SC Firm 79	1	US	1	MAN	9000	TECH	1	0.178955	0.0865396	0	0	0.117092	2.0679	15.3541	0.0534206	0.052207	-0.291621	-0.00360711	-0.14656	-0.150167	-0.150167	0.178955	0.0865396	16.97	8298635	786198	0.821045	0.178955
2009	79	SC Firm 79	1	US	1	MAN	9000	TECH	1	0.236516	0.0721494	0	0	0.0592551	3.27814	15.3174	0.0447252	0.0397122	-2.77553	0.0831784	0.0472457	0.130424	0.130424	0.236516	0.0721494	31.47	15595147	1212674	0.763484	0.240947
2010	79	SC Firm 79	1	US	1	MAN	9000	TECH	1	0.26221	0.0815477	0.106282	0.0288525	0.162508	3.21543	15.7351	0.0334844	0.075293	2.53192	0.109558	0.108807	0.218365	0.218365	0.26221	0.0815477	43.55	23460341	2083000	0.73779	0.178877
2011	79	SC Firm 79	1	US	1	MAN	9000	TECH	1	0.269801	0.132265	0.153392	0.0695462	0.136615	2.03985	15.8155	0.040708	0.021104	1.60145	0.0393805	-0.0206858	0.0186947	0.0186947	0.269801	0.132265	29.36	16001200	2439000	0.730199	0.14635
2012	79	SC Firm 79	1	US	1	MAN	9000	TECH	1	0.296574	0.149592	0.176778	0.0822264	0.103765	1.98256	15.8957	0.0432727	0.027831	2.32108	0.0789615	0.0503212	0.129283	0.129283	0.296574	0.149592	33.21	18896490	3324000	0.703426	0.149536
2013	79	SC Firm 79	1	US	1	MAN	9000	TECH	1	0.268726	0.152072	0.142245	0.0748748	0.119095	1.76709	15.9324	0.0515876	0.00579361	2.21931	-0.0204437	0.00852545	-0.0119182	-0.0119182	0.268726	0.152072	29.645	17223745	3089000	0.731274	0.1505
2014	79	SC Firm 79	1	US	1	MAN	9000	TECH	1	0.272873	0.115915	0.149423	0.057827	0.114345	2.35408	15.9471	0.041376	0.00917467	2.3882	0.0251784	0.00080186	0.0259803	0.0259803	0.272873	0.115915	43.33	25954670	3403000	0.727127	0.1465
2004	80	SC Firm 80	1	US	1	MAN	9000	TECH	1	0.232941	0.0290522	0	0	0.343945	7.29543	14.3263	0.0508901	0.0413559	3.78574	0.0100662	-0.0278449	-0.0177787	-0.0177787	0.232941	0.0290522	31.37	15248094	456246	0.767059	0.273229
2005	80	SC Firm 80	1	US	1	MAN	9000	TECH	1	0.20374	0.0282686	0	0	0.324849	7.20728	14.4917	0.0424326	0.00257854	3.34522	0.0167778	-0.0651609	-0.0483831	-0.0483831	0.20374	0.0282686	36.96	17090853	497189	0.79626	0.236031
2006	80	SC Firm 80	1	US	1	MAN	9000	TECH	1	0.124101	0.031029	0	0	0.143989	3.99951	14.7615	0.038104	0.129833	2.66663	0.0407155	0.410394	0.45111	0.45111	0.124101	0.031029	41.12	23107343	739957	0.875899	0.135961
2007	80	SC Firm 80	1	US	1	MAN	9000	TECH	1	0.160099	0.036599	0	0	0.200858	4.3744	14.9654	0.050713	0.0384205	1.77857	0.0305927	-0.200829	-0.170236	-0.170236	0.160099	0.036599	42.73	24079175	914754	0.839901	0.186167
2008	80	SC Firm 80	1	US	1	MAN	9000	TECH	1	0.222261	0.0959975	0.0717554	0.0279224	0.22812	2.31528	15.0908	0.0537717	0.0225891	-0.291621	0.0651302	-0.196348	-0.131217	-0.131217	0.222261	0.0959975	21.29	12184731	1293916	0.777739	0.182294
2009	80	SC Firm 80	1	US	1	MAN	9000	TECH	1	0.293754	0.103689	0.162785	0.0513041	0.134433	2.83303	14.8959	0.0532985	0.0577345	-2.77553	0.116072	0.0314277	0.1475	0.1475	0.293754	0.103689	36.78	18491605	2139183	0.706246	0.191105
2004	81	SC Firm 81	1	US	0	SERV	4000	HCARE	1	0.319795	0.0875408	0.0997958	0.0221218	0.207357	3.6531	14.32	0.129809	0.00709641	3.78574	-0.00189139	0.0826241	0.0807327	0.0807327	0.319795	0.0875408	63.98	6696934	642500	0.680205	0.247623
2005	81	SC Firm 81	1	US	0	SERV	4000	HCARE	1	0.318944	0.0953411	0.163414	0.0421073	0.221178	3.3453	14.3856	0.136829	0.0103296	3.34522	0.0353549	0.0214071	0.056762	0.056762	0.318944	0.0953411	65.92	6856504	722600	0.681056	0.188957
2006	81	SC Firm 81	1	US	0	SERV	4000	HCARE	1	0.24473	0.0611336	0.0805132	0.0172916	0.228526	4.00321	14.4984	0.150492	0.00190689	2.66663	-0.0725891	0.0597664	-0.0128228	-0.0128228	0.24473	0.0611336	82.97	8558807	557300	0.75527	0.188214
2007	81	SC Firm 81	1	US	0	SERV	4000	HCARE	1	0.245324	0.0600965	0.0745988	0.0156083	0.257645	4.08217	14.6049	0.139204	0.0202945	1.77857	0.0201979	0.0883862	0.108584	0.108584	0.245324	0.0600965	94.8	9498118	607300	0.754676	0.192648
2008	81	SC Firm 81	1	US	0	SERV	4000	HCARE	1	0.249465	0.0735631	0.0696582	0.0175726	0.256255	3.39118	14.7125	0.12507	0.00281471	-0.291621	0.0216453	0.00322617	0.0248715	0.0248715	0.249465	0.0735631	84.26	8374856	665000	0.750535	0.202086
2009	81	SC Firm 81	1	US	0	SERV	4000	HCARE	1	0.238501	0.0849087	0.0633833	0.0196543	0.273487	2.80892	14.7457	0.114589	0.0162531	-2.77553	0.00973546	0.0549383	0.0646737	0.0646737	0.238501	0.0849087	77.9	7471942	693300	0.761499	0.193849
2007	82	SC Firm 82	1	US	1	MAN	9000	TECH	1	0.131937	0.0244462	0.0680332	0.00910931	0.0473145	7.025	11.3336	0.0862343	0.129833	1.77857	0.0226952	0.410394	0.43309	0.43309	0.131937	0.0244462	23.02	927875	17760	0.868063	0.0775952
2008	82	SC Firm 82	1	US	1	MAN	9000	TECH	1	0.149526	0.0496294	0.0355224	0.0108212	0.0903456	3.01286	11.3692	0.0735294	0.00749148	-0.291621	0.0320381	0.0675028	0.0995409	0.0995409	0.149526	0.0496294	10.51	432833	22603	0.850474	0.118203
2009	82	SC Firm 82	1	US	1	MAN	9000	TECH	1	0.217333	0.0401982	0.054491	0.00861743	-0.032178	5.40653	11.525	0.0749368	0.0829939	-2.77553	0.104202	0.246282	0.350484	0.350484	0.217333	0.0401982	23.83	1036776	43422	0.782667	0.172227
2010	82	SC Firm 82	1	US	1	MAN	9000	TECH	1	0.175204	0.0284305	0.0439001	0.00628545	0.397801	6.16255	12.2381	0.0485632	0.129833	2.53192	0.0263048	0.161272	0.187576	0.187576	0.175204	0.0284305	37.68	1746029	51093	0.824796	0.157623
2011	82	SC Firm 82	1	US	1	MAN	9000	TECH	1	0.121075	0.0302981	0.0219433	0.00506303	0.0600377	3.99611	12.4654	0.0472635	0.129833	1.60145	-0.0207491	0.21118	0.190431	0.190431	0.121075	0.0302981	28.43	1396008	43618	0.878925	0.11786
2012	82	SC Firm 82	1	US	1	MAN	9000	TECH	1	0.25638	0.05104	0.158248	0.0284924	-0.0340192	5.02312	12.3694	0.0925841	0.09628	2.32108	0.124804	0.128222	0.253026	0.253026	0.25638	0.05104	31.21	1580193	84991	0.74362	0.123884
2013	82	SC Firm 82	1	US	1	MAN	9000	TECH	1	0.21596	0.0422348	0.139845	0.025368	0.0859546	5.11332	12.6248	0.0774325	0.0862125	2.21931	-0.0150033	0.122198	0.107195	0.107195	0.21596	0.0422348	34.51	1802155	79470	0.78404	0.0937375
2014	82	SC Firm 82	1	US	1	MAN	9000	TECH	1	0.218512	0.0258513	0.1256	0.0134493	0.0651201	7.29543	12.8293	0.139322	0.00507735	2.3882	0.0241427	0.113239	0.137382	0.137382	0.218512	0.0258513	61.82	3366611	89341	0.781488	0.113195
2006	83	SC Firm 83	1	US	0	SERV	4000	HCARE	1	0.273202	0.0333959	0.175242	0.0191552	0.0731372	7.29543	13.7089	0.0536024	0.00181834	2.66663	0.0456486	0.410394	0.456043	0.456043	0.273202	0.0333959	28.765	21633280	747423	0.726798	0.12323
2007	83	SC Firm 83	1	US	0	SERV	4000	HCARE	1	0.209548	0.0390369	0.0713109	0.0116297	0.126453	5.36793	14.1561	0.0546698	0.0380892	1.77857	0.00257886	0.177152	0.179731	0.179731	0.209548	0.0390369	23.105	18628387	756736	0.790452	0.151788
2008	83	SC Firm 83	1	US	0	SERV	4000	HCARE	1	0.214597	0.0362239	0.00631928	0.000874034	0.0959321	5.92419	14.6286	0.0560081	0.0373839	-0.291621	0.0443631	0.410394	0.454757	0.454757	0.214597	0.0362239	27.64	25380686	953942	0.785403	0.209602
2009	83	SC Firm 83	1	US	0	SERV	4000	HCARE	1	0.18457	0.0374399	0	0	0.179539	4.92977	14.805	0.055256	0.0645559	-2.77553	0.00756368	0.0234781	0.0310418	0.0310418	0.18457	0.0374399	27.84	25573349	994705	0.81543	0.18457
2010	84	SC Firm 84	1	US	0	SERV	4000	HCARE	1	0.303471	0.0463352	0.0416012	0.00481725	0.0804765	6.54947	12.2665	0.124373	0.0570143	2.53192	-0.0163682	0.145111	0.128742	0.128742	0.303471	0.0463352	22.75	1377936	66949	0.696529	0.273237
2011	84	SC Firm 84	1	US	0	SERV	4000	HCARE	1	0.261056	0.0327874	0	0	0.107688	7.29543	12.5338	0.124997	0.02997	1.60145	0.027516	0.193756	0.221272	0.221272	0.261056	0.0327874	34.41	2207654	74837	0.738944	0.261056
2012	84	SC Firm 84	1	US	0	SERV	4000	HCARE	1	0.253366	0.0359104	0.00748968	0.000827619	0.0584538	7.0555	12.7105	0.165378	0.0325894	2.32108	0.0276434	0.168159	0.195802	0.195802	0.253366	0.0359104	33.86	2255208	84002	0.746634	0.247732
2013	84	SC Firm 84	1	US	0	SERV	4000	HCARE	1	0.277149	0.0330502	0	0	0.0373032	7.29543	12.9024	0.215117	0.0172946	2.21931	0.064272	0.14106	0.205332	0.205332	0.277149	0.0330502	46.672	3199664	109364	0.722851	0.277149
2007	85	SC Firm 85	1	US	1	MAN	9000	TECH	1	0.289232	0.0957715	0.137733	0.0399157	0.211397	3.02002	14.2341	0.273876	0.00687326	1.77857	-0.0157507	0.0550405	0.0392898	0.0392898	0.289232	0.0957715	14.1	4614919	488790	0.710768	0.216374
2008	85	SC Firm 85	1	US	1	MAN	9000	TECH	1	0.249567	0.0645174	0.0911026	0.0203632	0.237493	3.86822	14.3319	0.256992	0.0194475	-0.291621	-0.0102909	0.011553	0.0012621	0.0012621	0.249567	0.0645174	20.61	6806635	469433	0.750433	0.227802
2009	85	SC Firm 85	1	US	1	MAN	9000	TECH	1	0.218526	0.0561918	0.0669716	0.0150526	0.223692	3.88892	14.3294	0.236985	0.00873831	-2.77553	3.90958e-05	0.0344555	0.0344946	0.0344946	0.218526	0.0561918	23.685	7886090	469517	0.781474	0.208217
2005	86	SC Firm 86	1	US	0	SERV	5000	CSERV	1	0.187967	0.0465366	0	0	0.347369	4.03913	14.1552	0.346135	0.01061	3.34522	0.0454197	0.044336	0.0897557	0.0897557	0.187967	0.0465366	20.69	3848903	187857	0.812033	0.193099
2006	86	SC Firm 86	1	US	0	SERV	5000	CSERV	1	0.242023	0.120206	0	0	0.314063	2.0134	14.3108	0.430632	0.0352575	2.66663	0.0649041	0.0242046	0.0891086	0.0891086	0.242023	0.120206	9.03	1878772	256696	0.757977	0.242023
2007	86	SC Firm 86	1	US	0	SERV	5000	CSERV	1	0.270061	0.324923	0	0	0.170732	0.831152	14.3545	0.454317	0.107105	1.77857	0.0647247	0.0157664	0.0804911	0.0804911	0.270061	0.324923	4.18	701435	337610	0.729939	0.270061
2008	86	SC Firm 86	1	US	0	SERV	5000	CSERV	1	0.264224	0.124675	0	0	0.0665822	2.11931	14.2745	0.457146	0.0778865	-0.291621	-0.0111101	0.00719061	-0.00391948	-0.00391948	0.264224	0.124675	14.05	2274669	323987	0.735776	0.264224
2009	86	SC Firm 86	1	US	0	SERV	5000	CSERV	1	0.255448	0.146415	0	0	0.162308	1.74468	14.3538	0.395456	0.0722833	-2.77553	0.00978008	0.00764026	0.0174203	0.0174203	0.255448	0.146415	12.03	1964005	336885	0.744552	0.255448
2010	86	SC Firm 86	1	US	0	SERV	5000	CSERV	1	0.247958	0.156481	0	0	0.192393	1.58459	14.46	0.365374	0.0259493	2.53192	0.0100486	0.01017	0.0202186	0.0202186	0.247958	0.156481	11.14	1892705	351114	0.752042	0.247958
2011	86	SC Firm 86	1	US	0	SERV	5000	CSERV	1	0.25527	0.110671	0	0	0.234491	2.30658	14.6023	0.386085	0.0266375	1.60145	0.0089008	0.0505399	0.0594407	0.0594407	0.25527	0.110671	18.46	2923421	363799	0.74473	0.291845
2012	86	SC Firm 86	1	US	0	SERV	5000	CSERV	1	0.275071	0.146826	0	0	0.252536	1.87345	14.7637	0.384733	0.014361	2.32108	0.04491	0.0294446	0.0743546	0.0743546	0.275071	0.146826	18.84	2526437	434785	0.724929	0.308377
2004	87	SC Firm 87	1	US	1	MAN	9000	TECH	1	0.280836	0.0797525	0	0	0.164565	3.52135	13.516	0.0538697	0.0167331	3.78574	-0.215353	0.0673059	-0.148047	-0.148047	0.280836	0.0797525	24.46	4167568	361179	0.719164	0.280836
2005	87	SC Firm 87	1	US	1	MAN	9000	TECH	1	0.285144	0.0871571	0.024889	0.00607254	0.153639	3.27161	13.7198	0.0433948	0.0102232	3.34522	0.0725582	0.143733	0.216291	0.216291	0.285144	0.0871571	28.73	5073948	484454	0.714856	0.266897
2006	87	SC Firm 87	1	US	1	MAN	9000	TECH	1	0.276706	0.103857	0	0	0.132344	2.66429	13.9415	0.0457304	0.0163073	2.66663	0.0374073	0.0329785	0.0703857	0.0703857	0.276706	0.103857	27.05	4833592	560184	0.723294	0.276706
2007	87	SC Firm 87	1	US	1	MAN	9000	TECH	1	0.274735	0.0890733	0	0	0.117333	3.08437	14.1462	0.0532242	0.0121735	1.77857	0.053728	0.067839	0.121567	0.121567	0.274735	0.0890733	38.01	7121554	696368	0.725265	0.274735
2008	87	SC Firm 87	1	US	1	MAN	9000	TECH	1	0.288179	0.154658	0	0	0.109433	1.86332	14.2751	0.0943969	0.0142846	-0.291621	0.0297194	-0.0366466	-0.0069272	-0.0069272	0.288179	0.154658	23.57	4243920	776441	0.711821	0.288179
2009	87	SC Firm 87	1	US	1	MAN	9000	TECH	1	0.292008	0.10618	0	0	0.111197	2.75011	14.2943	0.080133	0.00201343	-2.77553	0.0408259	0.0257594	0.0665853	0.0665853	0.292008	0.10618	41.61	7598360	902640	0.707992	0.292008
2010	87	SC Firm 87	1	US	1	MAN	9000	TECH	1	0.310673	0.0823228	0	0	0.124162	3.77384	14.4439	0.067632	0.0144893	2.53192	0.0669535	0.0236038	0.0905573	0.0905573	0.310673	0.0823228	68.41	12826191	1150609	0.689327	0.310673
2004	88	SC Firm 88	1	US	1	MAN	2000	IND	1	0.274861	0.113698	0.0511682	0.0179241	0.186888	2.41746	13.5769	0.226573	0.00379764	3.78574	0.0421171	0.0190444	0.0611615	0.0611615	0.274861	0.113698	27.385	1345117	172557	0.725139	0.27841
2005	88	SC Firm 88	1	US	1	MAN	2000	IND	1	0.246204	0.0979658	0.0309219	0.0104986	0.2067	2.51317	13.6808	0.2214	0.0134984	3.34522	-0.00933254	0.0244998	0.0151672	0.0151672	0.246204	0.0979658	29.71	1530817	166255	0.753796	0.260927
2006	88	SC Firm 88	1	US	1	MAN	2000	IND	1	0.223841	0.0880703	0.0275612	0.00940182	0.205366	2.54162	13.715	0.20141	0.00129406	2.66663	-0.00468306	-0.0176711	-0.0223541	-0.0223541	0.223841	0.0880703	33.81	1686220	162848	0.776159	0.239174
2007	88	SC Firm 88	1	US	1	MAN	2000	IND	1	0.213655	0.0826546	0.0291044	0.00984292	0.207273	2.58492	13.7334	0.228932	0.00140481	1.77857	-0.00666725	-0.00152611	-0.00819336	-0.00819336	0.213655	0.0826546	37.97	1752682	157920	0.786345	0.224562
2008	88	SC Firm 88	1	US	1	MAN	2000	IND	1	0.278537	0.140586	0.108319	0.0489516	0.190327	1.98126	13.8734	0.201068	0.0120396	-0.291621	0.113674	0.0323192	0.145993	0.145993	0.278537	0.140586	33.18	1631009	266806	0.721463	0.231942
2009	88	SC Firm 88	1	US	1	MAN	2000	IND	1	0.261975	0.136604	0.0677022	0.0313529	0.142071	1.91777	13.7187	0.193134	0.03417	-2.77553	-0.0119839	-0.0257832	-0.0377671	-0.0377671	0.261975	0.136604	32.44	1612562	255135	0.738025	0.241378
2010	88	SC Firm 88	1	US	1	MAN	2000	IND	1	0.244313	0.110545	0.0217048	0.00845686	0.168692	2.21007	13.8269	0.173804	0.0203288	2.53192	-0.000441285	-0.00595351	-0.00639479	-0.00639479	0.244313	0.110545	42.89	2049129	254675	0.755687	0.257541
2011	88	SC Firm 88	1	US	1	MAN	2000	IND	1	0.232623	0.0980718	0.019444	0.00706257	0.194072	2.37197	13.9347	0.162998	0.0187134	1.60145	0.00822692	-0.0166151	-0.00838816	-0.00838816	0.232623	0.0980718	49.99	2428017	264012	0.767377	0.249298
2012	88	SC Firm 88	1	US	1	MAN	2000	IND	1	0.210098	0.0990831	0.017126	0.00715331	0.18637	2.12042	13.9304	0.161842	0.00389991	2.32108	-0.00890832	-0.0100133	-0.0189216	-0.0189216	0.210098	0.0990831	47.78	2302894	253273	0.789902	0.238959
2013	88	SC Firm 88	1	US	1	MAN	2000	IND	1	0.243353	0.103654	0.131947	0.0518217	0.144227	2.34774	13.9384	0.144221	0.0268692	2.21931	0.0685423	0.0399767	0.108519	0.108519	0.243353	0.103654	64.35	3048929	352580	0.756647	0.172799
2004	89	SC Firm 89	1	US	1	MAN	3000	CGOODS	1	0.235869	0.028377	0.00651553	0.000620133	0.397801	7.29543	14.094	0.157303	0.00466329	3.78574	0.053259	0.151575	0.204834	0.204834	0.235869	0.028377	28.2	8434897	246348	0.764131	0.245977
2005	89	SC Firm 89	1	US	1	MAN	3000	CGOODS	1	0.226051	0.0244462	0.0146003	0.00123599	0.397801	7.29543	14.3173	0.148787	0.00203905	3.34522	0.0462553	0.151694	0.19795	0.19795	0.226051	0.0244462	33.34	12696317	309725	0.773949	0.217876
2006	89	SC Firm 89	1	US	1	MAN	3000	CGOODS	1	0.249693	0.0354264	0.00267231	0.000295628	0.397801	7.04822	14.526	0.18354	0.0342669	2.66663	0.0592713	0.140079	0.19935	0.19935	0.249693	0.0354264	42.96	11057944	406131	0.750307	0.267145
2007	89	SC Firm 89	1	US	1	MAN	3000	CGOODS	1	0.205229	0.0276876	0.00158982	0.000175569	0.397801	7.29543	14.7758	0.150422	0.0239424	1.77857	0.0394279	0.0827687	0.122197	0.122197	0.205229	0.0276876	30.58	17653775	502710	0.794771	0.218843
2010	90	SC Firm 90	1	US	1	MAN	1	OILGAS	1	0.0846403	0.0244462	0.00200292	0.000804963	-0.0340192	2.4678		0.265551	0.0239898	2.53192	-0.0246867	0.0652343	0.0405476	0.0405476	0.0846403	0.0244462	12.21	4282462	27409	0.91536	0.0775952
2011	90	SC Firm 90	1	US	1	MAN	1	OILGAS	1	0.177627	0.0694714	0.0599015	0.0215497	-0.0340192	2.55683		0.341513	0.0173425	1.60145	0.166784	0.195225	0.362009	0.362009	0.177627	0.0694714	15.52	6014491	449030	0.822373	0.125226
2012	90	SC Firm 90	1	US	1	MAN	1	OILGAS	1	0.329616	0.11591	0.310044	0.107002	-0.0340192	2.84371		0.274154	0.0116522	2.32108	0.217679	0.222688	0.440367	0.440367	0.329616	0.11591	24.56	10085198	1322241	0.670384	0.0775952
2004	91	SC Firm 91	1	US	1	MAN	2000	IND	1	0.132196	0.0519067	0	0	0.0992353	2.54679	12.2158	0.0449928	0.0302215	3.78574	0.0430558	0.0990516	0.142107	0.142107	0.132196	0.0519067	13.95	1287725	70501	0.867804	0.132196
2005	91	SC Firm 91	1	US	1	MAN	2000	IND	1	0.102807	0.0392855	0	0	0.0933006	2.61692	12.2871	0.0428208	0.00700208	3.34522	-0.0220702	0.04069	0.0186197	0.0186197	0.102807	0.0392855	15.045	1419375	58041	0.897193	0.102807
2006	91	SC Firm 91	1	US	1	MAN	2000	IND	1	0.103662	0.0492602	0	0	0.103361	2.10438	12.3814	0.0492348	0.00437122	2.66663	-0.00612881	-0.108707	-0.114836	-0.114836	0.103662	0.0492602	11.91	1057679	54801	0.896338	0.103662
2007	91	SC Firm 91	1	US	1	MAN	2000	IND	1	0.1171	0.0674562	0	0	0.0705315	1.73595	12.3269	0.0493674	0.0226118	1.77857	0.0155316	-0.0101289	0.00540269	0.00540269	0.1171	0.0674562	10.075	873442	63181	0.8829	0.1171
2008	91	SC Firm 91	1	US	1	MAN	2000	IND	1	0.12862	0.0941121	0	0	0.083825	1.36667	12.3995	0.058568	0.00319451	-0.291621	-0.00465988	-0.150373	-0.155033	-0.155033	0.12862	0.0941121	7.4	586894	60972	0.87138	0.12862
2009	91	SC Firm 91	1	US	1	MAN	2000	IND	1	0.10326	0.0607324	0	0	0.00781596	1.70025	12.0767	0.0649648	0.0515494	-2.77553	-0.0353537	-0.00423081	-0.0395845	-0.0395845	0.10326	0.0607324	8.855	702467	45421	0.89674	0.10326
2010	91	SC Firm 91	1	US	1	MAN	2000	IND	1	0.11216	0.0471582	0	0	0.160563	2.37838	12.58	0.0555164	0.112006	2.53192	0.0269591	0.0515772	0.0785363	0.0785363	0.11216	0.0471582	14.71	1208132	59793	0.88784	0.11216
2011	91	SC Firm 91	1	US	1	MAN	2000	IND	1	0.0962622	0.0375151	0	0	0.15544	2.56596	12.682	0.0518794	0.00188624	1.60145	-0.0014578	0.0407171	0.0392593	0.0392593	0.0962622	0.0375151	17.895	1511161	58901	0.903738	0.0962622
2012	91	SC Firm 91	1	US	1	MAN	2000	IND	1	0.0881446	0.0337457	0	0	0.150198	2.61202	12.6894	0.0554808	0.00466605	2.32108	-0.00570582	0.0277563	0.0220505	0.0220505	0.0881446	0.0337457	18.3951	1583998	55320	0.911855	0.0881446
2013	91	SC Firm 91	1	US	1	MAN	2000	IND	1	0.092697	0.0244462	0	0	0.13734	4.76398	12.7767	0.0523264	0.00792004	2.21931	0.0147485	0.0647627	0.0795112	0.0795112	0.092697	0.0244462	38.18	3315208	65787	0.907303	0.092697
2014	91	SC Firm 91	1	US	1	MAN	2000	IND	1	0.103801	0.0244462	0	0	0.190001	4.45652	13.0945	0.0559342	0.0375703	2.3882	0.0237425	0.0373722	0.0611147	0.0611147	0.103801	0.0244462	41.33	3576781	85297	0.896199	0.103801
2005	92	SC Firm 92	1	US	1	MAN	9000	TECH	1	0.179043	0.0244462	0	0	0.228782	7.29543	13.6943	0.168966	0.000834714	3.34522	0.0467736	0.103684	0.150458	0.150458	0.179043	0.0244462	12.5675	7004923	155748	0.820957	0.179043
2006	92	SC Firm 92	1	US	1	MAN	9000	TECH	1	0.190411	0.0244462	0	0	0.221048	7.29543	14.1692	0.166031	0.00629137	2.66663	0.0729528	0.0954456	0.168398	0.168398	0.190411	0.0244462	19.29	10996303	252482	0.809589	0.190411
2007	92	SC Firm 92	1	US	1	MAN	9000	TECH	1	0.193086	0.0350393	0	0	0.23687	5.51055	14.5742	0.193682	0.00866622	1.77857	0.055741	0.0329504	0.0886914	0.0886914	0.193086	0.0350393	16.97	9775127	354951	0.806914	0.201324
2008	92	SC Firm 92	1	US	1	MAN	9000	TECH	1	0.169163	0.0708538	0	0	0.249085	2.38749	14.8509	0.191721	0.0071033	-0.291621	0.0196824	0.0247086	0.044391	0.044391	0.169163	0.0708538	9.03	5267560	401688	0.830837	0.172235
2009	92	SC Firm 92	1	US	1	MAN	9000	TECH	1	0.205217	0.0483851	0	0	0.212046	4.24132	15.0029	0.144242	0.0228475	-2.77553	0.0848875	0.0435385	0.128426	0.128426	0.205217	0.0483851	22.665	13473481	685063	0.794783	0.205217
2010	92	SC Firm 92	1	US	1	MAN	9000	TECH	1	0.216819	0.0427038	0	0	0.21209	5.07728	15.3399	0.124468	0.00196349	2.53192	0.0673421	0.0442192	0.111561	0.111561	0.216819	0.0427038	36.645	22275836	993697	0.783181	0.217898
2011	92	SC Firm 92	1	US	1	MAN	9000	TECH	1	0.281722	0.0737348	0	0	0.228878	3.82075	15.6273	0.137626	0.0129272	1.60145	0.10131	-0.0938229	0.00748756	0.00748756	0.281722	0.0737348	32.155	19492747	1551708	0.718278	0.282329
2012	92	SC Firm 92	1	US	1	MAN	9000	TECH	1	0.255216	0.0694859	0	0	0.232779	3.67292	15.8097	0.148965	0.00172192	2.32108	0.0172816	-0.0230509	-0.00576932	-0.00576932	0.255216	0.0694859	36.9412	22288812	1664411	0.744784	0.255642
2013	92	SC Firm 92	1	US	1	MAN	9000	TECH	1	0.243125	0.0605523	0	0	0.255585	4.01513	15.9952	0.132907	0.0174645	2.21931	0.0385196	0.00875544	0.047275	0.047275	0.243125	0.0605523	50.49	30684187	1977757	0.756875	0.245728
2011	93	SC Firm 93	1	US	0	SERV	4000	HCARE	1	0.254105	0.167453	0.162714	0.102926	0.124101	1.51747	14.1013	0.232121	0.00800718	1.60145	-0.065207	0.037349	-0.0278581	-0.0278581	0.254105	0.167453	70.52	3315736	666903	0.745895	0.116821
2012	93	SC Firm 93	1	US	0	SERV	4000	HCARE	1	0.243988	0.133718	0.143875	0.0743986	0.134159	1.82464	14.1837	0.217671	0.00681976	2.32108	0.0172568	0.00701201	0.0242688	0.0242688	0.243988	0.133718	92.48	4649318	717662	0.756012	0.127466
2013	93	SC Firm 93	1	US	0	SERV	4000	HCARE	1	0.225625	0.102448	0.124242	0.0526508	0.144188	2.20233	14.2778	0.235832	0.00557537	2.21931	-0.0031298	-0.0279024	-0.0310322	-0.0310322	0.225625	0.102448	123.84	6201434	707843	0.774375	0.123697
2004	94	SC Firm 94	1	US	0	SERV	5000	CSERV	1	0.095695	0.0311347	2.62883e-05	7.98322e-06	0.228981	3.07358	12.8765	0.38285	0.0214594	3.78574	0.0133101	-0.00335055	0.00995953	0.00995953	0.095695	0.0311347	13.16	2004188	64405	0.904305	0.105114
2005	94	SC Firm 94	1	US	0	SERV	5000	CSERV	1	0.102417	0.0354751	0	0	0.235533	2.88702	13.0119	0.372098	0.00863507	3.34522	0.0212544	0.00191802	0.0231725	0.0231725	0.102417	0.0354751	11.53	2209659	81271	0.897583	0.106044
2006	94	SC Firm 94	1	US	0	SERV	5000	CSERV	1	0.0947072	0.033973	0	0	0.226911	2.78772	13.1779	0.382185	0.00380938	2.66663	0.00387167	0.000856148	0.00472782	0.00472782	0.0947072	0.033973	15	2409455	84735	0.905293	0.0947072
2007	94	SC Firm 94	1	US	0	SERV	5000	CSERV	1	0.118013	0.0459559	0.0102376	0.00370986	0.236098	2.56796	13.2369	0.414611	0.00598861	1.77857	0.0344973	-0.0507037	-0.0162064	-0.0162064	0.118013	0.0459559	21.275	2485719	119736	0.881987	0.122687
2008	94	SC Firm 94	1	US	0	SERV	5000	CSERV	1	0.149759	0.0377293	0.021073	0.00476901	0.29377	3.96932	13.5732	0.533691	0.034352	-0.291621	0.0245449	0.111874	0.136419	0.136419	0.149759	0.0377293	13.595	3652442	143207	0.850241	0.146143
2009	94	SC Firm 94	1	US	0	SERV	5000	CSERV	1	0.118688	0.0406466	0	0	0.252473	2.92001	13.5186	0.501767	0.0253404	-2.77553	-0.016664	-0.0124713	-0.0291352	-0.0291352	0.118688	0.0406466	18.31	2963886	125576	0.881312	0.129082
2010	94	SC Firm 94	1	US	0	SERV	5000	CSERV	1	0.107282	0.0411195	0.000888013	0.000317056	0.22971	2.60904	13.5579	0.466722	0.0130195	2.53192	0.00508947	0.0196605	0.0247499	0.0247499	0.107282	0.0411195	18.675	3074190	131830	0.892718	0.114422
2008	95	SC Firm 95	1	US	1	MAN	9000	TECH	1	0.30188	0.282659	0.106659	0.0981205	0.098359	1.068	15.5986	0.425789	0.0146217	-0.291621	0.0048816	-0.0516722	-0.0467906	-0.0467906	0.30188	0.282659	9.53	14752440	5813000	0.69812	0.218529
2009	95	SC Firm 95	1	US	1	MAN	9000	TECH	1	0.27011	0.160938	0.114208	0.0626398	0.0671989	1.67835	15.501	0.37544	0.0228107	-2.77553	-0.00286452	0.0189716	0.0161071	0.0161071	0.27011	0.160938	19.31	29988430	5752000	0.72989	0.176004
2010	95	SC Firm 95	1	US	1	MAN	9000	TECH	1	0.24999	0.176368	0.106896	0.0714032	0.0881431	1.41743	15.7074	0.346185	0.0177325	2.53192	0.0273294	0.0227229	0.0500523	0.0500523	0.24999	0.176368	19.32	30158520	6458000	0.75001	0.160221
2011	95	SC Firm 95	1	US	1	MAN	9000	TECH	1	0.243105	0.256103	0.101879	0.108407	0.101336	0.949249	15.8811	0.383187	0.00840475	1.60145	0.0112037	-0.0268601	-0.0156564	-0.0156564	0.243105	0.256103	12.98	19664700	6770000	0.756895	0.157246
2012	95	SC Firm 95	1	US	1	MAN	9000	TECH	1	0.268562	0.298369	0.138631	0.157115	0.0790809	0.900099	15.8965	0.361702	0.0154363	2.32108	0.0380936	-0.00653617	0.0315574	0.0315574	0.268562	0.298369	12.62	18551400	7889000	0.731438	0.150843
2013	95	SC Firm 95	1	US	1	MAN	9000	TECH	1	0.2569	0.22688	0.134655	0.116677	0.0863474	1.13232	15.8721	0.34416	0.00425811	2.21931	-0.0201208	-0.0601166	-0.0802374	-0.0802374	0.2569	0.22688	17.82	24930180	7316000	0.7431	0.141267
2014	95	SC Firm 95	1	US	1	MAN	9000	TECH	1	0.282207	0.225059	0.13135	0.100475	0.10621	1.25393	16.0892	0.424642	0.0106998	2.3882	0.0388517	-0.0427103	-0.00385856	-0.00385856	0.282207	0.225059	22.93	29212820	8484000	0.717793	0.173669
2004	96	SC Firm 96	1	US	1	MAN	2000	IND	1	0.0846403	0.0244462	0	0	0.0849023	3.71497	11.627	0.0579696	0.0204922	3.78574	0.0158021	0.0865053	0.102307	0.102307	0.0846403	0.0244462	46.18	845233	19208	0.91536	0.0934587
2005	96	SC Firm 96	1	US	1	MAN	2000	IND	1	0.0888377	0.0266085	0	0	0.0857578	3.3387	11.8081	0.06105	0.00674859	3.34522	0.0114045	0.0245184	0.0359229	0.0359229	0.0888377	0.0266085	43.17	806157	22037	0.911162	0.0937801
2006	96	SC Firm 96	1	US	1	MAN	2000	IND	1	0.0876607	0.0244462	0	0	0.0940869	3.79805	11.976	0.0668283	0.0089005	2.66663	0.00765329	0.0466894	0.0543427	0.0543427	0.0876607	0.0244462	53.56	1021978	24145	0.912339	0.0919521
2007	96	SC Firm 96	1	US	1	MAN	2000	IND	1	0.118806	0.0398974	0	0	0.0820804	2.9778	12.1694	0.0747103	0.0136533	1.77857	0.0437853	0.0508416	0.0946269	0.0946269	0.118806	0.0398974	47.25	920147	38237	0.881194	0.124402
2008	96	SC Firm 96	1	US	1	MAN	2000	IND	1	0.0922024	0.045284	0	0	0.169111	2.03609	12.2664	0.0504689	0.0616422	-0.291621	-0.0221482	-0.0139839	-0.0361321	-0.0361321	0.0922024	0.045284	32.94	650005	30831	0.907798	0.0925971
2009	96	SC Firm 96	1	US	1	MAN	2000	IND	1	0.112643	0.05026	0	0	0.118343	2.24121	12.2532	0.0473628	0.0261193	-2.77553	0.0364379	0.0908599	0.127298	0.127298	0.112643	0.05026	41.77	861172	45573	0.887357	0.112643
2010	96	SC Firm 96	1	US	1	MAN	2000	IND	1	0.128958	0.0452702	0	0	0.098779	2.84862	12.3294	0.159039	0.0100561	2.53192	0.0252998	0.0242398	0.0495396	0.0495396	0.128958	0.0452702	57.56	1195694	56696	0.871042	0.132256
2004	97	SC Firm 97	1	US	1	MAN	9000	TECH	1	0.0846403	0.0271329	0	0	0.227959	2.63987	12.6103	0.435258	0.0487027	3.78574	0.0265271	-0.016422	0.0101051	0.0101051	0.0846403	0.0271329	40.08	1612855	44982	0.91536	0.0778153
2005	97	SC Firm 97	1	US	1	MAN	9000	TECH	1	0.0846403	0.0244462	0	0	0.26973	2.62909	12.8596	0.438237	0.0257668	3.34522	-0.0115075	0.0864552	0.0749478	0.0749478	0.0846403	0.0244462	25.24	2007842	36036	0.91536	0.0829552
2006	97	SC Firm 97	1	US	1	MAN	9000	TECH	1	0.0846403	0.0244462	0	0	0.19509	2.05881	12.955	0.38018	0.047773	2.66663	0.00360031	0.0476316	0.0512319	0.0512319	0.0846403	0.0244462	17.32	1814062	39277	0.91536	0.0806343
2007	97	SC Firm 97	1	US	1	MAN	9000	TECH	1	0.0846403	0.0244462	0	0	0.0884647	2.12915	12.8844	0.333574	0.0682305	1.77857	0.0146959	0.127476	0.142171	0.142171	0.0846403	0.0244462	27.47	2320942	55681	0.91536	0.0897942
2008	97	SC Firm 97	1	US	1	MAN	9000	TECH	1	0.0986891	0.0585044	0	0	0.0860716	1.68687	13.1089	0.26497	0.00390969	-0.291621	0.0562948	0.0683992	0.124694	0.124694	0.0986891	0.0585044	15.87	2085924	129619	0.901311	0.127658
2009	97	SC Firm 97	1	US	1	MAN	9000	TECH	1	0.0975867	0.0486111	0	0	0.0957348	2.0075	13.2486	0.227907	0.011662	-2.77553	0.0053027	0.0380096	0.0433123	0.0433123	0.0975867	0.0486111	56.37	2682597	137067	0.902413	0.128025
2010	97	SC Firm 97	1	US	1	MAN	9000	TECH	1	0.0846403	0.0244462	0	0	0.133013	3.25501	13.6731	0.190856	0.0459248	2.53192	-0.00242682	0.294499	0.292073	0.292073	0.0846403	0.0244462	65.89	7026610	131730	0.91536	0.0778146
2011	97	SC Firm 97	1	US	1	MAN	9000	TECH	1	0.0846403	0.0420166	0	0	0.114138	1.58805	13.803	0.227214	0.0156674	1.60145	0.012885	0.0284135	0.0412985	0.0412985	0.0846403	0.0420166	22.04	3722254	163256	0.91536	0.0775952
2012	97	SC Firm 97	1	US	1	MAN	9000	TECH	1	0.0846403	0.0571806	0	0	0.0686141	1.094	13.9679	0.211997	0.0375311	2.32108	0.00313594	0.0945329	0.0976689	0.0976689	0.0846403	0.0571806	33.98	2833902	171872	0.91536	0.0775952
2013	97	SC Firm 97	1	US	1	MAN	9000	TECH	1	0.0846403	0.0280372	0	0	0.0829731	2.57364	14.1419	0.177838	0.0113686	2.21931	0.0158504	0.0561104	0.0719608	0.0719608	0.0846403	0.0280372	62.52	7635536	220254	0.91536	0.0805128
2014	97	SC Firm 97	1	US	1	MAN	9000	TECH	1	0.102276	0.055481	0	0	0.0896926	1.84345	14.3149	0.181114	0.00580091	2.3882	0.0364182	0.0460709	0.0824891	0.0824891	0.102276	0.055481	32.22	5823127	342050	0.897724	0.105916
2010	98	SC Firm 98	1	US	0	SERV	5000	CSERV	1	0.248845	0.0979999	0	0	0.290648	2.53924	14.4653	0.238439	0.058342	2.53192	-0.0309523	-0.0122876	-0.0432399	-0.0432399	0.248845	0.0979999	47.98	3728365	405077	0.751155	0.275487
2011	98	SC Firm 98	1	US	0	SERV	5000	CSERV	1	0.211812	0.0880736	0	0	0.304079	2.40494	14.5857	0.253036	0.0131429	1.60145	-0.00708942	-0.041386	-0.0484755	-0.0484755	0.211812	0.0880736	38.46	4058388	391958	0.788188	0.249114
2012	98	SC Firm 98	1	US	0	SERV	5000	CSERV	1	0.227918	0.173218	0	0	0.220099	1.31579	14.5439	0.300157	0.0684186	2.32108	0.0151905	-0.0851929	-0.0700024	-0.0700024	0.227918	0.173218	23.73	2004440	419947	0.772082	0.263845
2013	98	SC Firm 98	1	US	0	SERV	5000	CSERV	1	0.215269	0.169941	0	0	0.18492	1.26673	14.4907	0.307836	0.0279643	2.21931	-0.0108712	-0.0276529	-0.0385241	-0.0385241	0.215269	0.169941	35.5	1952585	399759	0.784731	0.247635
2014	98	SC Firm 98	1	US	0	SERV	5000	CSERV	1	0.208407	0.133859	0	0	0.15112	1.55692	14.4696	0.278247	0.0201856	2.3882	0.0082913	0.00850655	0.0167979	0.0167979	0.208407	0.133859	47.47	2693840	416322	0.791593	0.232396
2006	99	SC Firm 99	1	US	0	SERV	5000	CSERV	1	0.196135	0.0637605	0.0203323	0.0057596	0.187556	3.07611	12.8778	0.104148	0.0215003	2.66663	0.0268664	0.0589757	0.0858421	0.0858421	0.196135	0.0637605	31.02	2129134	145000	0.803865	0.179451
2007	99	SC Firm 99	1	US	0	SERV	5000	CSERV	1	0.19617	0.0482317	0.0139212	0.00292298	0.201021	4.06724	13.0858	0.0862683	0.0113294	1.77857	0.0499558	0.0605397	0.110495	0.110495	0.19617	0.0482317	49.72	3838929	194541	0.80383	0.184822
2008	99	SC Firm 99	1	US	0	SERV	5000	CSERV	1	0.202177	0.0624783	0.00871782	0.00230744	0.23327	3.23595	13.3696	0.0657975	0.019965	-0.291621	0.0565784	0.0517204	0.108299	0.108299	0.202177	0.0624783	32.76	4053569	270138	0.797823	0.2077
2009	99	SC Firm 99	1	US	0	SERV	5000	CSERV	1	0.14332	0.0497904	0.00546864	0.0017193	0.238518	2.87847	13.4863	0.058292	0.00405456	-2.77553	-0.0275113	0.0288956	0.00138429	0.00138429	0.14332	0.0497904	47.73	4325130	226634	0.85668	0.147193
2010	99	SC Firm 99	1	US	0	SERV	5000	CSERV	1	0.132312	0.0316919	0	0	0.281054	4.17495	13.7351	0.0549705	0.0284121	2.53192	-8.52917e-05	-0.0892899	-0.0893752	-0.0893752	0.132312	0.0316919	66.7	6920069	226488	0.867688	0.139058
2011	99	SC Firm 99	1	US	0	SERV	5000	CSERV	1	0.116857	0.0683289	0	0	0.263711	1.71021	13.7758	0.0621459	0.0217029	1.60145	-0.0033353	-0.0691827	-0.072518	-0.072518	0.116857	0.0683289	30.51	3002488	220203	0.883143	0.117213
2012	99	SC Firm 99	1	US	0	SERV	5000	CSERV	1	0.121294	0.065805	0	0	0.207764	1.84323	13.7462	0.129884	0.0314172	2.32108	0.00899124	-0.104809	-0.0958176	-0.0958176	0.121294	0.065805	29.33	3376376	237833	0.878706	0.122669
2013	99	SC Firm 99	1	US	0	SERV	5000	CSERV	1	0.147781	0.0683862	0	0	0.175113	2.16097	13.7208	0.139773	0.0289379	2.21931	0.0109336	0.00761934	0.0185529	0.0185529	0.147781	0.0683862	38.56	3498818	256835	0.852219	0.147781
2014	99	SC Firm 99	1	US	0	SERV	5000	CSERV	1	0.138101	0.0609744	0	0	0.165987	2.26491	13.7749	0.146045	0.00376792	2.3882	0.00864914	0.0114939	0.020143	0.020143	0.138101	0.0609744	43.12	4219613	273995	0.861899	0.138101
2004	100	SC Firm 100	1	US	0	SERV	5000	CSERV	1	0.321817	0.0922433	0.146727	0.0355158	0.362682	3.48879	13.8908	0.0705267	0.129833	3.78574	-0.247567	0.410394	0.162827	0.162827	0.321817	0.0922433	37.51	3861656	392409	0.678183	0.205198
2005	100	SC Firm 100	1	US	0	SERV	5000	CSERV	1	0.27948	0.126546	0.112162	0.0450601	0.0934102	2.20852	13.044	0.0649517	0.129833	3.34522	-0.0193447	0.0111485	-0.00819616	-0.00819616	0.27948	0.126546	24.56	2533170	367006	0.72052	0.188455
2006	100	SC Firm 100	1	US	0	SERV	5000	CSERV	1	0.193055	0.0749284	0.104013	0.0378163	0.00187119	2.57653	12.8862	0.0651449	0.0624742	2.66663	-0.0935634	0.0550408	-0.0385226	-0.0385226	0.193055	0.0749284	29.49	3051962	247201	0.806945	0.0993784
2007	100	SC Firm 100	1	US	0	SERV	5000	CSERV	1	0.232876	0.1119	0.064355	0.0277559	0.22308	2.08111	13.5505	0.065351	0.129833	1.77857	0.0467004	-0.173922	-0.127222	-0.127222	0.232876	0.1119	25.54	2454049	309209	0.767124	0.180112
2008	100	SC Firm 100	1	US	0	SERV	5000	CSERV	1	0.221051	0.11339	0.0644273	0.0301006	0.134211	1.94948	13.3848	0.0879846	0.0621102	-0.291621	-0.0156984	-0.110042	-0.12574	-0.12574	0.221051	0.11339	25.26	2257433	288706	0.778949	0.16741
2009	100	SC Firm 100	1	US	0	SERV	5000	CSERV	1	0.173532	0.0651268	0	0	0.140849	2.66452	13.4942	0.115846	0.00497941	-2.77553	-0.0334857	-0.0113273	-0.0448129	-0.0448129	0.173532	0.0651268	39.95	3473930	242007	0.826468	0.173532
2010	100	SC Firm 100	1	US	0	SERV	5000	CSERV	1	0.283047	0.16647	0	0	0.119008	1.70028	13.5732	0.099553	0.0167232	2.53192	0.14522	-0.0366466	0.108574	0.108574	0.283047	0.16647	29.47	2488494	496996	0.716953	0.283047
2011	100	SC Firm 100	1	US	0	SERV	5000	CSERV	1	0.237346	0.232404	0	0	0.063613	1.02126	13.4674	0.0969755	0.0376164	1.60145	-0.0420363	0.00619086	-0.0358455	-0.0358455	0.237346	0.232404	16.595	1394522	422217	0.762654	0.237346
2012	100	SC Firm 100	1	US	0	SERV	5000	CSERV	1	0.308128	0.29882	0.109227	0.105015	-0.0312639	1.03115	13.5276	0.0971704	0.0672865	2.32108	0.091038	0.01303	0.104068	0.104068	0.308128	0.29882	16.57	1406200	599276	0.691872	0.223291
2004	101	SC Firm 101	1	US	1	MAN	1	OILGAS	1	0.264961	0.160817	0.115272	0.0647785	0.099132	1.64759	12.3086	0.372922	0.00212652	3.78574	0.0219063	0.0206249	0.0425313	0.0425313	0.264961	0.160817	12.13	419719	80433	0.735039	0.191491
2005	101	SC Firm 101	1	US	1	MAN	1	OILGAS	1	0.218177	0.0931507	0.0113591	0.00421135	0.146226	2.3422	12.7391	0.272224	0.03857	3.34522	0.0303646	0.184761	0.215125	0.215125	0.218177	0.0931507	23.6	909637	93437	0.781823	0.221717
2006	101	SC Firm 101	1	US	1	MAN	1	OILGAS	1	0.202847	0.0709435	0.00778285	0.0023483	0.231113	2.85928	13.0007	0.217402	0.0642602	2.66663	0.0457932	0.0883088	0.134102	0.134102	0.202847	0.0709435	39.16	1580406	120681	0.797153	0.207952
2007	101	SC Firm 101	1	US	1	MAN	1	OILGAS	1	0.143551	0.0423696	0.00483336	0.00128041	0.22011	3.38806	13.1134	0.202403	0.00566423	1.77857	-0.0288945	0.0245305	-0.00436397	-0.00436397	0.143551	0.0423696	55.66	2270578	100460	0.856449	0.149204
2008	101	SC Firm 101	1	US	1	MAN	1	OILGAS	1	0.16843	0.125286	0.00269953	0.0019105	0.232978	1.34437	13.2044	0.236274	0.00740472	-0.291621	0.0208269	-0.204189	-0.183362	-0.183362	0.16843	0.125286	20.51	800353	114635	0.83157	0.175765
2009	101	SC Firm 101	1	US	1	MAN	1	OILGAS	1	0.128408	0.0447537	0.00145652	0.000463642	0.202217	2.86921	13.1997	0.238243	0.0198128	-2.77553	-0.0118618	0.050401	0.0385392	0.0385392	0.128408	0.0447537	56.48	2239913	104941	0.871592	0.135971
2010	101	SC Firm 101	1	US	1	MAN	1	OILGAS	1	0.117429	0.0345554	0.000389258	0.000104743	0.183699	3.39827	13.2468	0.260564	0.013084	2.53192	0.00679563	0.0238606	0.0306562	0.0306562	0.117429	0.0345554	77.72	3112044	111387	0.882571	0.126731
2011	101	SC Firm 101	1	US	1	MAN	1	OILGAS	1	0.139061	0.0540183	6.09681e-05	2.1555e-05	0.144928	2.57432	13.3069	0.252887	0.02684	1.60145	0.0364808	0.0022351	0.0387159	0.0387159	0.139061	0.0540183	65.82	2644347	151000	0.860939	0.147862
2012	101	SC Firm 101	1	US	1	MAN	1	OILGAS	1	0.12594	0.0498391	0	0	0.152598	2.52694	13.5049	0.240353	0.00535141	2.32108	0.00332048	0.0181015	0.021422	0.021422	0.12594	0.0498391	73.05	2956703	155089	0.87406	0.134001
2013	101	SC Firm 101	1	US	1	MAN	1	OILGAS	1	0.106989	0.0323419	0	0	0.181045	3.30807	13.679	0.218217	0.0203207	2.21931	-0.00404208	0.000842637	-0.00319944	-0.00319944	0.106989	0.0323419	109.93	4471279	149443	0.893011	0.110815
2014	101	SC Firm 101	1	US	1	MAN	1	OILGAS	1	0.137065	0.0623497	0	0	0.213837	2.19833	13.744	0.213576	0.0228389	2.3882	0.0339479	-0.141773	-0.107825	-0.107825	0.137065	0.0623497	76.73	2987291	198642	0.862935	0.140803
2004	102	SC Firm 102	1	US	0	SERV	5000	CSERV	1	0.141	0.0244462	0.0177927	0.00159437	0.163766	7.29543	15.0007	0.088821	0.0136404	3.78574	0.0353001	0.138982	0.174282	0.174282	0.141	0.0244462	24.4825	77866827	1126739	0.859	0.142455
2005	102	SC Firm 102	1	US	0	SERV	5000	CSERV	1	0.129385	0.0245173	0	0	0.153639	5.27731	15.3312	0.0679958	0.0072555	3.34522	0.0338099	0.196566	0.230375	0.230375	0.129385	0.0245173	18.1903	60688789	1525323	0.870615	0.147681
2006	102	SC Firm 102	1	US	0	SERV	5000	CSERV	1	0.189536	0.0585145	0	0	0.144107	3.23912	15.6022	0.0739733	0.0119089	2.66663	0.0764985	-0.033562	0.0429365	0.0429365	0.189536	0.0585145	12.6558	41151156	2557595	0.810464	0.191891
2007	102	SC Firm 102	1	US	0	SERV	5000	CSERV	1	0.205055	0.0656917	0.0161093	0.00444308	0.169583	3.12147	15.8531	0.0729174	0.0176595	1.77857	0.03861	0.0605457	0.0991557	0.0991557	0.205055	0.0656917	13.9689	44813769	3150878	0.794945	0.225265
2008	102	SC Firm 102	1	US	0	SERV	5000	CSERV	1	0.240797	0.17341	0.0778948	0.0529183	0.183012	1.3886	15.9604	0.0768779	0.00454194	-0.291621	0.0387199	-0.138324	-0.0996042	-0.0996042	0.240797	0.17341	5.87546	17897069	3754616	0.759203	0.225018
2009	102	SC Firm 102	1	US	0	SERV	5000	CSERV	1	0.200536	0.107849	0	0	0.0674464	1.85942	15.982	0.0713986	0.0802232	-2.77553	-0.00342709	0.0266114	0.0231843	0.0231843	0.200536	0.107849	9.90326	30537210	3691529	0.799464	0.25101
2010	102	SC Firm 102	1	US	0	SERV	5000	CSERV	1	0.275231	0.143607	0.10113	0.0473292	0.128956	1.91655	16.0299	0.0692306	0.0501386	2.53192	0.107463	-0.0259099	0.0815534	0.0815534	0.275231	0.143607	11.713	36115269	6056126	0.724769	0.223023
2009	103	SC Firm 103	1	US	0	SERV	4000	HCARE	1	0.283256	0.0848872	0.0723442	0.0179759	0.183411	3.33685	14.0942	0.155989	0.00309132	-2.77553	-0.0394924	0.0309502	-0.00854225	-0.00854225	0.283256	0.0848872	21.7125	4933080	457600	0.716744	0.22736
2010	103	SC Firm 103	1	US	0	SERV	4000	HCARE	1	0.259733	0.0470499	0.030963	0.00447614	0.196922	5.52037	14.185	0.152671	0.0125557	2.53192	0.000792214	-0.0383092	-0.037517	-0.037517	0.259733	0.0470499	40.42	9296600	459000	0.740267	0.23608
2011	103	SC Firm 103	1	US	0	SERV	4000	HCARE	1	0.324464	0.0737818	0.101055	0.0183029	0.18152	4.39761	14.3335	0.153648	0.0089872	1.60145	0.0927039	-0.104519	-0.0118152	-0.0118152	0.324464	0.0737818	35.35	8066870	642600	0.675536	0.248523
2004	104	SC Firm 104	1	US	1	MAN	3000	CGOODS	1	0.191991	0.049605	0	0	0.173684	3.87039	14.9562	0.080778	0.0496268	3.78574	0.0217391	0.0702517	0.0919908	0.0919908	0.191991	0.049605	52.31	16074623	839000	0.808009	0.199542
2005	104	SC Firm 104	1	US	1	MAN	3000	CGOODS	1	0.21637	0.0538035	0	0	0.103511	4.02149	14.8977	0.0893753	0.0527999	3.34522	0.0250798	-0.0752394	-0.0501596	-0.0501596	0.21637	0.0538035	50.36	16689272	949000	0.78363	0.222982
2006	104	SC Firm 104	1	US	1	MAN	3000	CGOODS	1	0.214924	0.0659516	0	0	0.043529	3.25882	14.944	0.0940536	0.0500453	2.66663	0.0305091	0.101244	0.131753	0.131753	0.214924	0.0659516	58.41	15663874	1106000	0.785076	0.216479
2007	104	SC Firm 104	1	US	1	MAN	3000	CGOODS	1	0.28305	0.0975894	0	0	-0.00990262	2.90042	15.1143	0.0653573	0.0365414	1.77857	0.100512	0.121967	0.222479	0.222479	0.28305	0.0975894	16.04	15858636	1715000	0.71695	0.283875
2008	104	SC Firm 104	1	US	1	MAN	3000	CGOODS	1	0.321077	0.203675	0	0	-0.0273621	1.57642	15.2534	0.0756734	0.0192073	-0.291621	-0.0455323	-0.0171013	-0.0626336	-0.0626336	0.321077	0.203675	17.75	5872496	1502000	0.678923	0.330056
2011	105	SC Firm 105	1	US	1	MAN	2000	IND	1	0.279953	0.0846042	0	0	0.228512	3.30897	15.6338	0.187945	0.00808261	1.60145	-0.0232487	-0.00686299	-0.0301117	-0.0301117	0.279953	0.0846042	40.96	8683670	802576	0.720047	0.301096
2012	105	SC Firm 105	1	US	1	MAN	2000	IND	1	0.286863	0.0940518	0	0	0.1932	3.05005	15.606	0.18828	0.0254581	2.32108	0.0151832	0.00509423	0.0202774	0.0202774	0.286863	0.0940518	39.55	8162804	847429	0.713137	0.313604
2013	105	SC Firm 105	1	US	1	MAN	2000	IND	1	0.289155	0.0886398	0	0	0.199065	3.26214	15.6206	0.186766	0.0024324	2.21931	0.00806651	-0.0107436	-0.00267712	-0.00267712	0.289155	0.0886398	44.25	8962980	871748	0.710845	0.308487
2004	106	SC Firm 106	1	US	1	MAN	9000	TECH	1	0.146559	0.0475251	0	0	0.0881908	3.08382	12.0505	0.0331509	0.0380574	3.78574	0.0423053	0.410394	0.4527	0.4527	0.146559	0.0475251	24.36	1059155	52848	0.853441	0.146559
2005	106	SC Firm 106	1	US	1	MAN	9000	TECH	1	0.144256	0.0441953	0	0	0.145154	3.26406	12.5476	0.030048	0.041893	3.34522	0.0459777	0.196229	0.242207	0.242207	0.144256	0.0441953	28.595	1677638	77572	0.855744	0.144256
2006	106	SC Firm 106	1	US	1	MAN	9000	TECH	1	0.154971	0.0490757	0	0	0.13944	3.1578	12.8842	0.0410563	0.00383344	2.66663	0.0486367	0.123762	0.172399	0.172399	0.154971	0.0490757	37.105	2190594	113053	0.845029	0.154971
2007	106	SC Firm 106	1	US	1	MAN	9000	TECH	1	0.18396	0.0524527	0	0	0.136996	3.50716	13.1724	0.0381494	0.00237657	1.77857	0.0642368	0.0816689	0.145906	0.145906	0.18396	0.0524527	28.52	3138055	173711	0.81604	0.18396
2008	106	SC Firm 106	1	US	1	MAN	9000	TECH	1	0.235263	0.106737	0	0	0.136504	2.20414	13.385	0.0506344	0.00625494	-0.291621	0.0503107	-0.134844	-0.0845337	-0.0845337	0.235263	0.106737	22.86	1849218	220964	0.764737	0.235263
2009	106	SC Firm 106	1	US	1	MAN	9000	TECH	1	0.252305	0.079921	0	0	0.142854	3.15694	13.3895	0.036842	0.00480153	-2.77553	0.0455352	-0.0100819	0.0354533	0.0354533	0.252305	0.079921	52.97	3104020	269625	0.747695	0.252305
2010	106	SC Firm 106	1	US	1	MAN	9000	TECH	1	0.263174	0.0412055	0	0	0.187848	6.38687	13.6899	0.025075	0.0369172	2.53192	0.0652397	0.0392933	0.104533	0.104533	0.263174	0.0412055	130.16	8341653	358494	0.736826	0.263174
2011	106	SC Firm 106	1	US	1	MAN	9000	TECH	1	0.295249	0.0760902	0	0	0.397801	3.88025	13.9569	0.0306003	0.129833	1.60145	0.0666979	-0.0890371	-0.0223391	-0.0223391	0.295249	0.0760902	106.12	5623252	463113	0.704751	0.295249
2012	106	SC Firm 106	1	US	1	MAN	9000	TECH	1	0.304416	0.0659748	0	0	0.240142	4.61413	14.1356	0.0311867	0.129833	2.32108	0.0621013	-0.0268009	0.0353003	0.0353003	0.304416	0.0659748	97.15	8236738	581801	0.695584	0.304416
2013	106	SC Firm 106	1	US	1	MAN	9000	TECH	1	0.307769	0.0929299	0	0	0.20807	3.31184	14.2084	0.0284781	0.0206692	2.21931	0.0469368	-0.0280899	0.0188469	0.0188469	0.307769	0.0929299	90.86	6700747	686496	0.692231	0.310166
2004	107	SC Firm 107	1	US	0	SERV	5000	CSERV	1	0.284355	0.0449884	0	0	0.397801	6.32064	12.4368	0.190969	0.0576113	3.78574	0.0932948	-0.208	-0.114705	-0.114705	0.284355	0.0449884	38.96	1387905	65381	0.715645	0.284355
2005	107	SC Firm 107	1	US	0	SERV	5000	CSERV	1	0.209375	0.0412334	0	0	0.366413	5.07782	12.6528	0.150661	0.0475884	3.34522	0.0212443	0.13785	0.159095	0.159095	0.209375	0.0412334	41.16	1691924	72764	0.790625	0.228531
2006	107	SC Firm 107	1	US	0	SERV	5000	CSERV	1	0.196847	0.0400725	0.00498559	0.000852694	0.318414	4.91228	12.8671	0.130814	0.0342489	2.66663	0.0377055	0.0442864	0.0819919	0.0819919	0.196847	0.0400725	56.48	2156026	90004	0.803153	0.211492
2007	107	SC Firm 107	1	US	0	SERV	5000	CSERV	1	0.206184	0.0359301	0	0	0.350532	5.73848	13.0728	0.15073	0.0218131	1.77857	0.0343389	-0.0830492	-0.0487103	-0.0487103	0.206184	0.0359301	55.7	2897538	107989	0.793816	0.218499
2008	107	SC Firm 107	1	US	0	SERV	5000	CSERV	1	0.198682	0.0373403	0	0	0.365395	5.32086	13.263	0.155146	0.012023	-0.291621	0.0148006	-0.072656	-0.0578554	-0.0578554	0.198682	0.0373403	44.24	3008121	116681	0.801318	0.207404
2009	107	SC Firm 107	1	US	0	SERV	5000	CSERV	1	0.202719	0.0475787	0	0	0.387143	4.26071	13.3407	0.13941	0.0139728	-2.77553	0.0186655	-0.117359	-0.0986936	-0.0986936	0.202719	0.0475787	65.87	2572569	128514	0.797281	0.209989
2010	107	SC Firm 107	1	US	0	SERV	5000	CSERV	1	0.214814	0.0392988	0	0	0.397801	5.46618	13.3709	0.123323	0.00774103	2.53192	0.0154466	-0.1699	-0.154454	-0.154454	0.214814	0.0392988	93.76	3385075	138471	0.785186	0.220602
2011	107	SC Firm 107	1	US	0	SERV	5000	CSERV	1	0.210726	0.0337994	0	0	0.397801	6.23463	13.496	0.124148	0.0132174	1.60145	0.000104953	-0.171074	-0.170969	-0.170969	0.210726	0.0337994	87.28	3960354	138540	0.789274	0.216373
2012	107	SC Firm 107	1	US	0	SERV	5000	CSERV	1	0.200659	0.0329677	0	0	0.397801	6.08654	13.5996	0.110251	0.0217482	2.32108	0.00107471	0.410394	0.411469	0.411469	0.200659	0.0329677	88.06	4085643	139286	0.799341	0.204394
2013	107	SC Firm 107	1	US	0	SERV	5000	CSERV	1	0.211566	0.0318806	0	0	0.397801	6.63619	13.6625	0.0947135	0.0010441	2.21931	0.00975953	-0.208	-0.198241	-0.198241	0.211566	0.0318806	108.58	4434253	146022	0.788434	0.215037
2014	107	SC Firm 107	1	US	0	SERV	5000	CSERV	1	0.224979	0.0272597	0	0	0.397801	7.29543	13.7325	0.0869119	0.0451772	2.3882	0.0048054	-0.208	-0.203195	-0.203195	0.224979	0.0272597	140.75	5324403	149209	0.775021	0.229384
2011	108	SC Firm 108	1	US	1	MAN	9000	TECH	1	0.301822	0.275796	0.181615	0.163526	0.164541	1.09437	14.2785	0.395168	0.0159557	1.60145	-0.0272601	-0.00123909	-0.0284991	-0.0284991	0.301822	0.275796	12.04	1535080	584600	0.698178	0.161237
2012	108	SC Firm 108	1	US	1	MAN	9000	TECH	1	0.258135	0.214028	0.151787	0.122843	0.103721	1.20608	14.1562	0.406019	0.038847	2.32108	-0.052179	0.0109878	-0.0411911	-0.0411911	0.258135	0.214028	14.4	1785833	486300	0.741865	0.140029
2013	108	SC Firm 108	1	US	1	MAN	9000	TECH	1	0.225056	0.195506	0.125699	0.107387	0.0940423	1.15114	14.1558	0.394154	0.0132271	2.21931	-0.0457127	-0.00601336	-0.0517261	-0.0517261	0.225056	0.195506	13.35	1663255	404200	0.774944	0.129065
2014	108	SC Firm 108	1	US	1	MAN	9000	TECH	1	0.27044	0.1824	0.13789	0.0878073	0.127228	1.48268	14.1756	0.371618	0.0221499	2.3882	0.0311408	-0.0735895	-0.0424486	-0.0424486	0.27044	0.1824	16.88	2047588	456800	0.72956	0.173998
2004	109	SC Firm 109	1	US	1	MAN	2000	IND	1	0.0984198	0.0244462	0	0	0.298595	6.12272	14.0294	0.249491	0.04251	3.78574	0.019823	0.0100727	0.0298957	0.0298957	0.0984198	0.0244462	15.39	4671011	76311	0.90158	0.117356
2005	109	SC Firm 109	1	US	1	MAN	2000	IND	1	0.102848	0.0244462	0	0	0.334126	6.74391	14.2364	0.252179	0.0236497	3.34522	0.0171083	-0.0164432	0.000665142	0.000665142	0.102848	0.0244462	19.565	5910782	91538	0.897152	0.119642
2006	109	SC Firm 109	1	US	1	MAN	2000	IND	1	0.0999946	0.0244462	0	0	0.340382	5.32157	14.4085	0.254115	0.00465636	2.66663	0.0118939	0.0102703	0.0221642	0.0221642	0.0999946	0.0244462	17.94	5425297	103896	0.900005	0.112532
2007	109	SC Firm 109	1	US	1	MAN	2000	IND	1	0.118473	0.0244462	0	0	0.355721	5.30088	14.5391	0.237844	0.0109735	1.77857	0.0291429	-0.00288033	0.0262626	0.0262626	0.118473	0.0244462	20.21	6027459	137791	0.881527	0.131463
2008	109	SC Firm 109	1	US	1	MAN	2000	IND	1	0.113479	0.0277958	0	0	0.375472	4.08258	14.6658	0.248577	0.015413	-0.291621	0.00782273	-0.00560365	0.00221907	0.00221907	0.113479	0.0277958	17.425	5176295	147993	0.886521	0.124135
2009	109	SC Firm 109	1	US	1	MAN	2000	IND	1	0.0900352	0.0244462	0	0	0.253684	4.71502	14.4732	0.252384	0.0861812	-2.77553	-0.0214592	0.00775676	-0.0137024	-0.0137024	0.0900352	0.0244462	20.82	6139015	119509	0.909965	0.102847
2010	109	SC Firm 109	1	US	1	MAN	2000	IND	1	0.110459	0.0244462	0	0	0.320428	6.12604	14.6351	0.247513	0.0489228	2.53192	0.0290652	0.0106975	0.0397628	0.0397628	0.110459	0.0244462	29.955	8832574	162185	0.889541	0.126523
2011	109	SC Firm 109	1	US	1	MAN	2000	IND	1	0.111468	0.0244462	0	0	0.367672	7.29543	14.8332	0.258525	0.0342726	1.60145	0.0152129	0.0147447	0.0299576	0.0299576	0.111468	0.0244462	43.61	12876231	187818	0.888532	0.134112
2012	109	SC Firm 109	1	US	1	MAN	2000	IND	1	0.112441	0.0244462	0	0	0.397801	7.29543	14.9577	0.284402	0.0209641	2.32108	0.00900744	0.0337575	0.042765	0.042765	0.112441	0.0244462	46.65	13834728	204174	0.887559	0.140691
2013	109	SC Firm 109	1	US	1	MAN	2000	IND	1	0.115538	0.0244462	0	0	0.373933	6.90756	15.0173	0.315471	0.019642	2.21931	0.0171781	0.00631761	0.0234957	0.0234957	0.115538	0.0244462	47.51	14098761	239832	0.884462	0.146011
2014	109	SC Firm 109	1	US	1	MAN	2000	IND	1	0.159108	0.0259817	0.0433997	0.00635527	0.364248	6.12387	15.1329	0.323805	0.00676468	2.3882	0.057446	-0.0210979	0.0363482	0.0363482	0.159108	0.0259817	47.56	14071475	375353	0.840892	0.150008
2012	110	SC Firm 110	1	US	1	MAN	2000	IND	1	0.305238	0.150025	0.0940411	0.0400333	0.145526	2.03458	13.7009	0.0890212	0.00376528	2.32108	-0.00790457	0.0391266	0.0312221	0.0312221	0.305238	0.150025	55.4704	2134390	376732	0.694762	0.24737
2013	110	SC Firm 110	1	US	1	MAN	2000	IND	1	0.238124	0.0827276	0	0	0.134311	2.87841	13.7402	0.110673	0.00849504	2.21931	-0.0260483	0.0844901	0.0584419	0.0584419	0.238124	0.0827276	89.36	3765273	339585	0.761876	0.244387
2014	110	SC Firm 110	1	US	1	MAN	2000	IND	1	0.25879	0.0885572	0	0	0.134849	2.92229	13.7708	0.115525	0.00424237	2.3882	0.0192775	-0.0735116	-0.054234	-0.054234	0.25879	0.0885572	90.35	3776359	366917	0.74121	0.265544
2010	111	SC Firm 111	1	US	1	MAN	9000	TECH	1	0.210125	0.0685971	0.0541349	0.015598	0.176835	3.06318	13.7629	0.142002	0.0736912	2.53192	-0.103771	0.296195	0.192424	0.192424	0.210125	0.0685971	16.745	2525378	185992	0.789875	0.164918
2011	111	SC Firm 111	1	US	1	MAN	9000	TECH	1	0.20211	0.1148	0.0528555	0.0277777	0.103227	1.76054	13.7669	0.168983	0.0595042	1.60145	0.0102524	0.0323346	0.042587	0.042587	0.20211	0.1148	16.29	1510781	195931	0.79789	0.159618
2012	111	SC Firm 111	1	US	1	MAN	9000	TECH	1	0.199477	0.142598	0.0472533	0.0320422	0.0786121	1.39887	13.7476	0.199874	0.0214031	2.32108	0.00507121	0.0384612	0.0435324	0.0435324	0.199477	0.142598	23.92	1208806	201042	0.800523	0.159773
2013	111	SC Firm 111	1	US	1	MAN	9000	TECH	1	0.321517	0.152199	0.198898	0.0859714	0.121241	2.11248	13.9612	0.182517	0.0420211	2.21931	0.18727	0.0650845	0.252354	0.252354	0.321517	0.152199	19.41	2682056	481487	0.678483	0.153063
2014	111	SC Firm 111	1	US	1	MAN	9000	TECH	1	0.288739	0.170466	0.167074	0.0921785	0.0803115	1.69382	14.0394	0.20348	0.0377714	2.3882	-0.021521	0.0488742	0.0273532	0.0273532	0.288739	0.170466	14.54	2180520	448089	0.711261	0.14607
2005	112	SC Firm 112	1	US	1	MAN	9000	TECH	1	0.299815	0.0806284	0.242655	0.0615813	0.109398	3.71848	12.5536	0.0503478	0.129833	3.34522	-0.0464263	0.410394	0.363968	0.363968	0.299815	0.0806284	19.93	3047737	267285	0.700185	0.0775952
2006	112	SC Firm 112	1	US	1	MAN	9000	TECH	1	0.23498	0.0332911	0.173206	0.0229487	0.0991168	7.05833	12.9684	0.0694132	0.0111088	2.66663	0.0207976	0.218824	0.239622	0.239622	0.23498	0.0332911	53.12	8515079	293239	0.76502	0.0775952
2007	112	SC Firm 112	1	US	1	MAN	9000	TECH	1	0.179642	0.0491853	0.128243	0.0335845	0.130832	3.65234	13.3636	0.0812453	0.0147163	1.77857	0.00256998	0.182901	0.185471	0.185471	0.179642	0.0491853	34.6	5750957	297495	0.820358	0.0775952
2008	112	SC Firm 112	1	US	1	MAN	9000	TECH	1	0.16597	0.10885	0.113	0.0725249	0.166327	1.52476	13.581	0.0927632	0.0189337	-0.291621	0.00780775	0.0345995	0.0424073	0.0424073	0.16597	0.10885	15.09	2555819	312181	0.83403	0.0775952
2009	112	SC Firm 112	1	US	1	MAN	9000	TECH	1	0.167083	0.0743967	0.103047	0.0440068	0.165953	2.24584	13.6644	0.0873787	0.00488606	-2.77553	0.0175362	0.0115156	0.0290518	0.0290518	0.167083	0.0743967	25.34	4339433	348788	0.832917	0.0775952
2010	112	SC Firm 112	1	US	1	MAN	9000	TECH	1	0.0846403	0.0244462	0	0	0.168788	3.8062	13.8388	0.108782	0.000445656	2.53192	-0.073838	0.11377	0.0399316	0.0399316	0.0846403	0.0244462	47.05	8779689	175071	0.91536	0.0775952
2011	112	SC Firm 112	1	US	1	MAN	9000	TECH	1	0.0846403	0.0319729	0	0	0.201252	2.5236	13.9627	0.124938	0.0153963	1.60145	0.00604562	-0.0947597	-0.0887141	-0.0887141	0.0846403	0.0319729	32.28	5729849	189251	0.91536	0.0806868
2012	112	SC Firm 112	1	US	1	MAN	9000	TECH	1	0.0980044	0.0338568	0	0	0.201814	2.89467	14.1332	0.132695	0.00450292	2.32108	0.0252331	-0.00556981	0.0196633	0.0196633	0.0980044	0.0338568	40.91	7273095	254873	0.901996	0.0980044
2013	112	SC Firm 112	1	US	1	MAN	9000	TECH	1	0.109382	0.0369778	0	0	0.203973	2.95804	14.2716	0.152243	0.0129415	2.21931	0.0232087	-0.00171519	0.0214935	0.0214935	0.109382	0.0369778	47.18	8425437	323517	0.890618	0.110983
2014	112	SC Firm 112	1	US	1	MAN	9000	TECH	1	0.25413	0.0830626	0.168506	0.0511257	0.185422	3.0595	14.4904	0.15034	0.0127308	2.3882	0.173282	0.0041279	0.17741	0.17741	0.25413	0.0830626	62.96	11225806	1016912	0.74587	0.112796
2008	113	SC Firm 113	1	US	1	MAN	1	OILGAS	1	0.284445	0.0517704	0.115962	0.0176971	0.237018	5.49436	14.0357	0.398497	0.0762942	-0.291621	0.154843	0.0318964	0.186739	0.186739	0.284445	0.0517704	137.96	11016385	601460	0.715555	0.190584
2009	113	SC Firm 113	1	US	1	MAN	1	OILGAS	1	0.208008	0.0575921	0.0618719	0.0151141	0.246876	3.61174	14.5412	0.295202	0.0012122	-2.77553	0.0284415	0.149158	0.1776	0.1776	0.208008	0.0575921	135.4	11400857	696725	0.791992	0.155774
2010	113	SC Firm 113	1	US	1	MAN	1	OILGAS	1	0.211272	0.0765023	0.0642929	0.0208072	0.205347	2.76165	14.7569	0.326634	0.0273511	2.53192	0.0522173	0.0314941	0.0837115	0.0837115	0.211272	0.0765023	130.14	11171675	925458	0.788728	0.157078
2008	114	SC Firm 114	1	US	1	MAN	2000	IND	1	0.314541	0.0825632	0.176893	0.0404428	0.261379	3.80969	13.8897	0.0985467	0.0296638	-0.291621	-0.00706644	0.0301947	0.0231283	0.0231283	0.314541	0.0825632	30.68	4337753	390369	0.685459	0.17205
2009	114	SC Firm 114	1	US	1	MAN	2000	IND	1	0.193084	0.0545448	0.0458803	0.0114607	0.260807	3.53992	13.9527	0.0930799	0.00222084	-2.77553	-0.0681117	0.083671	0.0155593	0.0155593	0.193084	0.0545448	32.73	5001995	288573	0.806916	0.155769
2010	114	SC Firm 114	1	US	1	MAN	2000	IND	1	0.173172	0.0635881	0	0	0.226296	2.72334	14.1437	0.101822	0.0271374	2.53192	0.0178038	0.0439411	0.0617449	0.0617449	0.173172	0.0635881	29.75	4736557	321641	0.826828	0.180259
2011	114	SC Firm 114	1	US	1	MAN	2000	IND	1	0.257245	0.124574	0.135408	0.0604584	0.181561	2.065	14.2499	0.0866725	0.0341247	1.60145	0.107582	-0.057178	0.0504045	0.0504045	0.257245	0.124574	25.07	3885073	552848	0.742755	0.148938
2012	114	SC Firm 114	1	US	1	MAN	2000	IND	1	0.260964	0.149435	0.132984	0.0709025	0.16755	1.74634	14.1558	0.096599	0.00384721	2.32108	0.00859789	-0.0717785	-0.0631806	-0.0631806	0.260964	0.149435	22.3157	3253941	571683	0.739036	0.156316
2013	114	SC Firm 114	1	US	1	MAN	2000	IND	1	0.30628	0.144841	0.192497	0.0837886	0.151579	2.1146	14.2186	0.0998742	0.0109674	2.21931	0.0623212	-0.0507596	0.0115616	0.0115616	0.30628	0.144841	30.1	4237538	717724	0.69372	0.146137
2014	114	SC Firm 114	1	US	1	MAN	2000	IND	1	0.310254	0.139375	0.186805	0.076388	0.148365	2.22604	14.2412	0.104967	0.00051896	2.3882	0.00536146	-0.0549349	-0.0495734	-0.0495734	0.310254	0.139375	32.31	4509797	730345	0.689746	0.157715
2006	115	SC Firm 115	1	US	0	SERV	5000	CSERV	1	0.279778	0.296829	0.0909091	0.0980159	0.180671	0.942557	15.5647	0.201293	0.00106513	2.66663	-0.104955	0.028932	-0.0760234	-0.0760234	0.279778	0.296829	13.66	2153368	909000	0.720222	0.221607
2007	115	SC Firm 115	1	US	0	SERV	5000	CSERV	1	0.299722	0.460185	0.0886838	0.162357	0.0755473	0.751684	15.5087	0.160654	0.0724417	1.77857	0.0194265	-0.0117175	0.00770891	0.00770891	0.299722	0.460185	7.34	1140196	972000	0.700278	0.234659
2008	115	SC Firm 115	1	US	0	SERV	5000	CSERV	1	0.327077	0.347444	0.0683349	0.0743709	0.10219	0.941379	15.4713	0.150156	0.0230826	-0.291621	-0.0107751	-0.0563087	-0.0670838	-0.0670838	0.327077	0.347444	11.14	1767348	941000	0.672923	0.281891
2009	115	SC Firm 115	1	US	0	SERV	5000	CSERV	1	0.308239	0.240071	0.0661553	0.0478237	0.0838068	1.28395	15.3953	0.137429	0.00917099	-2.77553	-0.0259233	0.0205966	-0.0053267	-0.0053267	0.308239	0.240071	19.62	2747597	868000	0.691761	0.259233
2010	115	SC Firm 115	1	US	0	SERV	5000	CSERV	1	0.30076	0.178491	0.0633673	0.0330454	0.131906	1.68502	15.4347	0.133287	0.0362532	2.53192	0.00103591	0.000345304	0.00138122	0.00138122	0.30076	0.178491	23.84	4008806	871000	0.69924	0.253453
2011	115	SC Firm 115	1	US	0	SERV	5000	CSERV	1	0.306557	0.152742	0.06	0.0253692	0.182295	2.00702	15.5424	0.14	0.0360099	1.60145	0.0209836	-0.0285246	-0.00754098	-0.00754098	0.306557	0.152742	32.12	5186419	935000	0.693443	0.263934
2012	115	SC Firm 115	1	US	0	SERV	5000	CSERV	1	0.292545	0.149277	0.0528827	0.0231446	0.220374	1.95975	15.6372	0.14553	0.0276469	2.32108	0.01485	-0.00623701	0.00861301	0.00861301	0.292545	0.149277	41.44	5613475	985000	0.707455	0.254529
2013	115	SC Firm 115	1	US	0	SERV	5000	CSERV	1	0.279036	0.114879	0.0523935	0.0182037	0.231718	2.42896	15.6881	0.1692	0.00583218	2.21931	-0.00344135	-0.0513335	-0.0547749	-0.0547749	0.279036	0.114879	56.18	7496792	973000	0.720964	0.244336
2006	116	SC Firm 116	1	US	1	MAN	3000	CGOODS	1	0.276068	0.0858108	0.0180381	0.00450114	0.182185	3.21717	14.0094	0.201149	0.00114441	2.66663	0.0533499	0.00949687	0.0628468	0.0628468	0.276068	0.0858108	41.98	2507577	235375	0.723932	0.280388
2007	116	SC Firm 116	1	US	1	MAN	3000	CGOODS	1	0.298227	0.224706	0.0167795	0.0115054	0.195328	1.32719	14.1753	0.16572	0.0151804	1.77857	0.0885627	0.0476489	0.136212	0.136212	0.298227	0.224706	16.7	1155138	334798	0.701773	0.300653
2008	116	SC Firm 116	1	US	1	MAN	3000	CGOODS	1	0.241215	0.104598	0.0119804	0.00443605	0.223869	2.30611	14.275	0.190682	0.0163586	-0.291621	-0.0667031	-0.0107983	-0.0775014	-0.0775014	0.241215	0.104598	33.56	2245155	262272	0.758785	0.253057
2009	116	SC Firm 116	1	US	1	MAN	3000	CGOODS	1	0.224573	0.0565304	0.00817254	0.00170184	0.19817	3.9726	14.2525	0.166369	0.0165888	-2.77553	0.019108	0.0200614	0.0391693	0.0391693	0.224573	0.0565304	70.48	4784290	286663	0.775427	0.239366
2004	117	SC Firm 117	1	US	1	MAN	9000	TECH	1	0.157749	0.0260401	0	0	0.273196	6.0579	13.5444	0.153599	0.0160247	3.78574	0.0642864	0.03312	0.0974064	0.0974064	0.157749	0.0260401	30.42	6592781	176267	0.842251	0.162462
2005	117	SC Firm 117	1	US	1	MAN	9000	TECH	1	0.143503	0.0265398	0	0	0.278594	5.40709	13.8429	0.131529	0.00425277	3.34522	0.0141077	-0.0232111	-0.00910342	-0.00910342	0.143503	0.0265398	33.175	7170245	195485	0.856497	0.150467
2006	117	SC Firm 117	1	US	1	MAN	9000	TECH	1	0.178137	0.0273275	0.000159042	2.06181e-05	0.314831	6.51862	14.3887	0.132306	0.031173	2.66663	0.0750888	-0.0073062	0.0677826	0.0677826	0.178137	0.0273275	55.66	12028015	337930	0.821863	0.178634
2007	117	SC Firm 117	1	US	1	MAN	9000	TECH	1	0.282219	0.0413827	0	0	0.294646	6.81971	14.9725	0.113672	0.0117828	1.77857	0.17955	0.0337173	0.213267	0.213267	0.282219	0.0413827	97	21517907	928911	0.717781	0.285845
2008	117	SC Firm 117	1	US	1	MAN	9000	TECH	1	0.236727	0.151682	0	0	0.320268	1.56068	15.0666	0.151734	0.0127932	-0.291621	-0.0798297	-0.07298	-0.15281	-0.15281	0.236727	0.151682	19.17	3885039	694657	0.763273	0.241467
2009	117	SC Firm 117	1	US	1	MAN	9000	TECH	1	0.256386	0.136581	0	0	0.229919	1.87717	14.8961	0.11529	0.0625317	-2.77553	0.0749221	0.0137795	0.0887016	0.0887016	0.256386	0.136581	30.7	6204489	981465	0.743614	0.259042
2010	117	SC Firm 117	1	US	1	MAN	9000	TECH	1	0.233696	0.13642	0	0	0.182225	1.71306	14.805	0.107255	0.0323197	2.53192	-0.0123662	0.410394	0.398028	0.398028	0.233696	0.13642	30.99	5900710	932140	0.766304	0.235447
2011	117	SC Firm 117	1	US	1	MAN	9000	TECH	1	0.270569	0.135033	0	0	0.143492	2.00372	14.8302	0.0932842	0.0252948	1.60145	0.0620991	0.0125276	0.0746267	0.0746267	0.270569	0.135033	39.81	7749519	1209806	0.729431	0.271676
2012	117	SC Firm 117	1	US	1	MAN	9000	TECH	1	0.266617	0.141061	0	0	0.140737	1.89008	14.8146	0.085026	0.00107411	2.32108	0.0155744	0.0169508	0.0325252	0.0325252	0.266617	0.141061	40.75	7823674	1284861	0.733383	0.267129
2013	117	SC Firm 117	1	US	1	MAN	9000	TECH	1	0.249639	0.11797	0	0	0.133789	2.11611	14.7832	0.0850168	0.0054646	2.21931	-0.0136737	-0.0274123	-0.0410859	-0.0410859	0.249639	0.11797	46.19	9107655	1218139	0.750361	0.249999
2014	117	SC Firm 117	1	US	1	MAN	9000	TECH	1	0.26643	0.108057	0	0	0.163561	2.46564	14.8701	0.0918089	0.0208683	2.3882	0.00688215	-0.0453806	-0.0384985	-0.0384985	0.26643	0.108057	52.83	10321565	1250439	0.73357	0.274846
2004	118	SC Firm 118	1	US	1	MAN	3000	CGOODS	1	0.0846403	0.0244462	0	0	0.200507	3.42353	13.1336	0.158309	0.0120829	3.78574	0.000438811	0.0359043	0.0363432	0.0363432	0.0846403	0.0244462	9.255	2882627	50857	0.91536	0.0858717
2005	118	SC Firm 118	1	US	1	MAN	3000	CGOODS	1	0.0846403	0.0244462	0	0	0.173542	3.36093	13.1928	0.177783	0.019383	3.34522	0.00783724	0.0290458	0.0368831	0.0368831	0.0846403	0.0244462	9.75	3042858	58088	0.91536	0.0878452
2006	118	SC Firm 118	1	US	1	MAN	3000	CGOODS	1	0.0846403	0.0252224	0	0	0.196439	2.89708	13.2574	0.234557	0.0094407	2.66663	-0.000923533	0.0181113	0.0171878	0.0171878	0.0846403	0.0252224	7.78	2216929	57363	0.91536	0.10488
2007	118	SC Firm 118	1	US	1	MAN	3000	CGOODS	1	0.0846403	0.0258887	0	0	0.19391	2.94051	13.3908	0.228959	0.00231993	1.77857	0.0122491	0.0488808	0.0611299	0.0611299	0.0846403	0.0258887	8.885	2572284	68363	0.91536	0.101569
2008	118	SC Firm 118	1	US	1	MAN	3000	CGOODS	1	0.0846403	0.0391154	0	0	0.189625	1.65741	13.3436	0.28168	0.0107478	-0.291621	-0.0247551	-0.0271441	-0.0518992	-0.0518992	0.0846403	0.0391154	4.415	1215304	49472.3	0.91536	0.0845323
2009	118	SC Firm 118	1	US	1	MAN	3000	CGOODS	1	0.0846403	0.0244462	0	0	0.161661	3.07316	13.2077	0.240128	0.0194939	-2.77553	0.0111421	0.0563725	0.0675146	0.0675146	0.0846403	0.0244462	8.925	2469358	58637.8	0.91536	0.105366
2010	118	SC Firm 118	1	US	1	MAN	3000	CGOODS	1	0.0846403	0.0244462	0	0	0.228977	4.26676	13.6125	0.204557	0.0533411	2.53192	0.0134148	0.0904879	0.103903	0.103903	0.0846403	0.0244462	14.78	4206155	72088.6	0.91536	0.108867
2011	118	SC Firm 118	1	US	1	MAN	3000	CGOODS	1	0.0856226	0.0244462	0	0	0.23299	3.71055	13.839	0.240251	0.00443873	1.60145	0.0243242	0.0415555	0.0658797	0.0658797	0.0856226	0.0244462	14.795	4263018	100694	0.914377	0.12662
2012	118	SC Firm 118	1	US	1	MAN	3000	CGOODS	1	0.0846403	0.0315832	0	0	0.228835	2.20034	13.9104	0.27648	0.00533699	2.32108	-0.0100633	0.0292839	0.0192206	0.0192206	0.0846403	0.0315832	9.425	2696989	87957.4	0.91536	0.114349
2013	118	SC Firm 118	1	US	1	MAN	3000	CGOODS	1	0.218586	0.0743441	0.165369	0.0538253	0.208403	2.9402	13.9741	0.202383	0.0116261	2.21931	0.168726	0.0333093	0.202035	0.202035	0.218586	0.0743441	16.49	4801163	385605	0.781414	0.0926029
2014	118	SC Firm 118	1	US	1	MAN	3000	CGOODS	1	0.193596	0.0683916	0.140053	0.0474391	0.235452	2.8307	14.1343	0.184615	0.0172868	2.3882	0.00294222	0.0405335	0.0434757	0.0434757	0.193596	0.0683916	18.065	5333654	391556	0.806404	0.0917176
2011	119	SC Firm 119	2	UK	1	MAN	3000	CGOODS	1	0.277704	0.330384	5.37924e-05	6.90302e-05	0.0601104	0.840551	14.6845	0.0111517	0.00955996	1.9724	-0.0963819	-0.00131199	-0.0976939	-0.0976939	0.277704	0.330384	6.11348	2250301	1.11028e+06	0.722296	0.285281
2012	119	SC Firm 119	2	UK	1	MAN	3000	CGOODS	1	0.28034	0.251456	0	0	0.0787753	1.11487	14.8442	0.010682	0.0132889	1.17906	0.0362572	0.00506955	0.0413268	0.0413268	0.28034	0.251456	10.8855	3796094	1.27521e+06	0.71966	0.287735
2013	119	SC Firm 119	2	UK	1	MAN	3000	CGOODS	1	0.315922	0.210088	0	0	0.113037	1.50376	15.0549	0.0105197	0.0242099	2.1599	0.0611204	-0.0221788	0.0389416	0.0389416	0.315922	0.210088	18.3965	5944799	1.5811e+06	0.684078	0.323332
2007	120	SC Firm 120	2	UK	1	MAN	1000	BMAT	1	0.231157	0.0619194	0.015606	0.00346841	0.108267	3.7332	12.5525	0.345702	0.0413268	2.58604	0.0061866	0.292753	0.29894	0.29894	0.231157	0.0619194	36.6577	2734108	180469	0.768843	0.220827
2008	120	SC Firm 120	2	UK	1	MAN	1000	BMAT	1	0.175338	0.0311477	0.0084806	0.00129161	0.105814	5.62925	12.7325	0.409205	0.00109	-0.466877	-0.0443598	0.0544737	0.0101139	0.0101139	0.175338	0.0311477	43.1177	4480071	144030	0.824662	0.171956
2009	120	SC Firm 120	2	UK	1	MAN	1000	BMAT	1	0.0928052	0.0255359	0.00255455	0.000655624	0.0670191	3.6343	12.978	0.501601	0.020141	-4.19194	0.0136751	0.410394	0.424069	0.424069	0.0928052	0.0255359	80.7702	6446114	168921	0.907195	0.093098
2010	120	SC Firm 120	2	UK	1	MAN	1000	BMAT	1	0.0951132	0.0244462	0.0016331	0.000383314	0.0859171	3.95519	13.091	0.655836	0.0144629	1.54018	0.010413	0.0327176	0.0431306	0.0431306	0.0951132	0.0244462	82.2843	7698303	189688	0.904887	0.0999564
2011	120	SC Firm 120	2	UK	1	MAN	1000	BMAT	1	0.130529	0.0335484	0.00118	0.000273097	0.228652	3.89077	13.9351	0.666963	0.0881002	1.9724	0.0559897	0.0166398	0.0726295	0.0726295	0.130529	0.0335484	102.298	9569089	332171	0.869471	0.137899
2012	120	SC Firm 120	2	UK	1	MAN	1000	BMAT	1	0.119819	0.0403176	0.00122529	0.00037846	0.207043	2.97188	13.9837	0.430346	0.0202074	1.17906	0.00942241	0.0135163	0.0229387	0.0229387	0.119819	0.0403176	96.6929	8581539	360522	0.880181	0.128495
2013	120	SC Firm 120	2	UK	1	MAN	1000	BMAT	1	0.138905	0.0785032	0.00100638	0.000531736	0.14335	1.76942	13.9445	0.431658	0.0446673	2.1599	0.0321314	0.00796236	0.0400937	0.0400937	0.138905	0.0785032	62.7473	5505443	469014	0.861095	0.146466
2014	120	SC Firm 120	2	UK	1	MAN	1000	BMAT	1	0.114653	0.0568615	0.000883488	0.000411507	0.120801	2.01635	13.8987	0.42301	0.017959	2.94025	-0.0180964	0.00900234	-0.00909404	-0.00909404	0.114653	0.0568615	68.2094	6718865	405078	0.885347	0.122337
2009	121	SC Firm 121	2	UK	0	SERV	5000	CSERV	1	0.0846403	0.0244462	0	0	0.397801	5.87159	15.462	0.00747944	0.129833	-4.19194	0.00112239	0.410394	0.411517	0.411517	0.0846403	0.0244462	8.26279	8774817	17769.4	0.91536	0.0775952
2010	121	SC Firm 121	2	UK	0	SERV	5000	CSERV	1	0.0846403	0.0244462	0	0	0.397801	6.44792	15.4242	0.00747944	0.0521427	1.54018	-0.00230613	0.0767062	0.0744001	0.0744001	0.0846403	0.0244462	8.44682	10416175	14039	0.91536	0.0775952
2011	121	SC Firm 121	2	UK	0	SERV	5000	CSERV	1	0.0846403	0.0244462	0	0	0.397801	5.50519	15.4113	0.00747944	0.0274906	1.9724	-3.20061e-05	0.100849	0.100817	0.100817	0.0846403	0.0244462	8.06264	9889563	13981.5	0.91536	0.0775952
2012	121	SC Firm 121	2	UK	0	SERV	5000	CSERV	1	0.0846403	0.0244462	0	0	0.397801	6.15464	15.4752	0.00747944	0.0158302	1.17906	-0.00629949	0.0890185	0.0827191	0.0827191	0.0846403	0.0244462	10.4331	12070604	1625.09	0.91536	0.0775952
2013	121	SC Firm 121	2	UK	0	SERV	5000	CSERV	1	0.0846403	0.0244462	0	0	0.397801	7.29543	15.4805	0.00747944	0.001481	2.1599	0.000804446	0.0633105	0.064115	0.064115	0.0846403	0.0244462	14.8839	16531144	3311.2	0.91536	0.0775952
2004	122	SC Firm 122	2	UK	1	MAN	2000	IND	1	0.238785	0.0854237	0	0	0.169575	2.79531	12.3558	0.399462	0.00694603	2.48846	0.0550611	0.0156442	0.0707053	0.0707053	0.238785	0.0854237	12.1818	681018	63608.7	0.761215	0.264462
2005	122	SC Firm 122	2	UK	1	MAN	2000	IND	1	0.236027	0.0691039	0	0	0.216404	3.41553	12.5328	0.362979	0.0297436	2.99636	0.0356763	0.0370337	0.0727099	0.0727099	0.236027	0.0691039	16.6862	1009453	74935.5	0.763973	0.292191
2006	122	SC Firm 122	2	UK	1	MAN	2000	IND	1	0.213617	0.0656586	0	0	0.231149	3.25345	12.6911	0.351656	0.0107507	2.66182	0.00714527	0.0212533	0.0283986	0.0283986	0.213617	0.0656586	14.6713	1103257	77528.8	0.786383	0.273405
2007	122	SC Firm 122	2	UK	1	MAN	2000	IND	1	0.108873	0.0492123	0	0	0.201586	2.21231	12.8033	0.343586	0.0239076	2.58604	-0.0819978	0.0102543	-0.0717436	-0.0717436	0.108873	0.0492123	12.4045	854385	44222.5	0.891127	0.168983
2008	122	SC Firm 122	2	UK	1	MAN	2000	IND	1	0.207142	0.0801717	0	0	0.214063	2.58373	12.9014	0.30509	0.0100975	-0.466877	0.108687	-0.0191523	0.0895351	0.0895351	0.207142	0.0801717	7.22529	1067483	93041.2	0.792858	0.262077
2009	122	SC Firm 122	2	UK	1	MAN	2000	IND	1	0.251302	0.193409	0	0	0.0997391	1.29933	12.5494	0.356856	0.092795	-4.19194	-0.0227795	-0.0377985	-0.060578	-0.060578	0.251302	0.193409	8.80395	355770	85308.4	0.748698	0.302796
2004	123	SC Firm 123	2	UK	0	SERV	4000	HCARE	1	0.101983	0.0900596	0.00156653	0.00136553	0.103709	1.13239	14.1256	0.027121	0.129833	2.48846	-0.0350315	-0.208	-0.243032	-0.243032	0.101983	0.0900596	10.4936	4851420	480160	0.898017	0.100574
2005	123	SC Firm 123	2	UK	0	SERV	4000	HCARE	1	0.193188	0.128779	0.0017155	0.00105971	0.0797594	1.50015	14.2851	0.0408821	0.0170434	2.99636	0.103224	-0.208	-0.104776	-0.104776	0.193188	0.128779	12.8051	6975646	1031100	0.806812	0.233939
2006	123	SC Firm 123	2	UK	0	SERV	4000	HCARE	1	0.246463	0.129499	0.00241692	0.00110074	0.0581575	1.90321	14.4014	0.0454833	0.0183282	2.66182	0.0654601	-0.0153951	0.050065	0.050065	0.246463	0.129499	20.7436	9437811	1404000	0.753537	0.270477
2011	124	SC Firm 124	2	UK	0	SERV	4000	HCARE	1	0.314725	0.144538	0.0900699	0.0351361	0.262903	2.17745	15.2671	0.164946	0.00077529	1.9724	-0.0836318	0.00547714	-0.0781546	-0.0781546	0.314725	0.144538	9.71711	8842352	1494000	0.685275	0.260796
2012	124	SC Firm 124	2	UK	0	SERV	4000	HCARE	1	0.30078	0.149895	0.10605	0.0463721	0.20631	2.00661	15.2355	0.140553	0.0344252	1.17906	0.0359801	0.0182559	0.0542361	0.0542361	0.30078	0.149895	11.0425	9624278	1697000	0.69922	0.228642
2013	124	SC Firm 124	2	UK	0	SERV	4000	HCARE	1	0.295927	0.124546	0.0871212	0.0312921	0.220485	2.37604	15.2859	0.14023	0.0045062	2.1599	0.00429627	0.0756144	0.0799106	0.0799106	0.295927	0.124546	14.2547	12104173	1722000	0.704073	0.237326
2008	125	SC Firm 125	2	UK	1	MAN	1	OILGAS	1	0.26766	0.136579	0.242337	0.121598	0.0393014	1.95974	11.3336	0.24168	0.0311513	-0.466877	-0.00943435	-0.0308307	-0.0402651	-0.0402651	0.26766	0.136579	3.43403	1648795	260813	0.73234	0.0775952
2009	125	SC Firm 125	2	UK	1	MAN	1	OILGAS	1	0.261241	0.161357	0.228389	0.138707	0.0592622	1.61903	11.3336	0.538251	0.0124215	-4.19194	0.0161315	0.0160319	0.0321634	0.0321634	0.261241	0.161357	4.64139	1444777	277978	0.738759	0.0775952
2010	125	SC Firm 125	2	UK	1	MAN	1	OILGAS	1	0.118128	0.0652395	0.0699103	0.0376872	0.0299115	1.81069	11.3336	0.589149	0.0168004	1.54018	-0.1182	0.122227	0.00402725	0.00402725	0.118128	0.0652395	4.94479	1990853	138947	0.881872	0.0775952
2011	125	SC Firm 125	2	UK	1	MAN	1	OILGAS	1	0.111376	0.0840032	0.0393957	0.0291335	0.138001	1.32585	12.3637	0.620984	0.0693261	1.9724	0.0026465	0.0011957	0.0038422	0.0038422	0.111376	0.0840032	3.89857	1551999	142329	0.888624	0.104308
2012	125	SC Firm 125	2	UK	1	MAN	1	OILGAS	1	0.102429	0.0733143	0.0353003	0.0247406	0.3434	1.39712	13.3401	0.568228	0.129833	1.17906	0.00338946	-0.121955	-0.118566	-0.118566	0.102429	0.0733143	4.9884	1860595	147200	0.897571	0.148424
2013	125	SC Firm 125	2	UK	1	MAN	1	OILGAS	1	0.0846403	0.0450803	0	0	0.277872	1.58738	13.3181	0.58811	0.0472964	2.1599	-0.0364771	0.0527706	0.0162936	0.0162936	0.0846403	0.0450803	6.18726	2065305	97500	0.91536	0.206752
2014	125	SC Firm 125	2	UK	1	MAN	1	OILGAS	1	0.0846403	0.0601009	0	0	0.205398	1.38364	13.013	0.616273	0.0556869	2.94025	0.00709884	0.00522662	0.0123255	0.0123255	0.0846403	0.0601009	4.72483	1667085	106600	0.91536	0.239332
2004	126	SC Firm 126	2	UK	1	MAN	9000	TECH	1	0.105863	0.051326	0	0	0.0574036	2.06255	12.589	0.0126158	0.0316347	2.48846	0.0555238	0.0996153	0.155139	0.155139	0.105863	0.051326	2.11982	2706418	146425	0.894137	0.108824
2005	126	SC Firm 126	2	UK	1	MAN	9000	TECH	1	0.0846403	0.0324945	0	0	0.077984	2.31949	12.8994	0.0110106	0.00262012	2.99636	-0.0286766	0.0781155	0.0494389	0.0494389	0.0846403	0.0324945	2.08254	3158138	106069	0.91536	0.0866134
2006	126	SC Firm 126	2	UK	1	MAN	9000	TECH	1	0.105443	0.0489643	0	0	0.0950084	2.15346	13.1532	0.0138352	0.0113835	2.66182	0.0326784	-0.0940051	-0.0613267	-0.0613267	0.105443	0.0489643	2.46317	2985403	153704	0.894557	0.111882
2007	126	SC Firm 126	2	UK	1	MAN	9000	TECH	1	0.0966599	0.0382427	0	0	0.107347	2.52754	13.1507	0.0145207	0.00452668	2.58604	-0.0237918	-0.0159508	-0.0397426	-0.0397426	0.0966599	0.0382427	2.46105	3101960	123344	0.90334	0.0992029
2008	126	SC Firm 126	2	UK	1	MAN	9000	TECH	1	0.1257	0.0675185	0	0	0.104698	1.86172	12.9882	0.0167381	0.00525007	-0.466877	0.0262742	0.174661	0.200935	0.200935	0.1257	0.0675185	1.26516	2153636	155939	0.8743	0.127142
2009	126	SC Firm 126	2	UK	1	MAN	9000	TECH	1	0.124415	0.0494332	0	0	0.0946994	2.51682	13.1077	0.0160631	0.00549469	-4.19194	0.0101051	-0.0502305	-0.0401254	-0.0401254	0.124415	0.0494332	2.86734	3263679	169724	0.875585	0.125267
2010	126	SC Firm 126	2	UK	1	MAN	9000	TECH	1	0.174668	0.0318957	0	0	0.121229	5.47622	13.3602	0.0127662	0.0266477	1.54018	0.0743559	0.0102965	0.0846523	0.0846523	0.174668	0.0318957	6.60302	8969998	295531	0.825332	0.174946
2011	126	SC Firm 126	2	UK	1	MAN	9000	TECH	1	0.183557	0.0284115	0	0	0.134133	6.46067	13.5464	0.0139569	0.0149729	1.9724	0.0371982	0.00543768	0.0426358	0.0426358	0.183557	0.0284115	9.19669	12674858	370642	0.816443	0.183557
2012	126	SC Firm 126	2	UK	1	MAN	9000	TECH	1	0.177734	0.0248667	0.00478587	0.000567016	0.158304	7.14745	13.751	0.0246114	0.0158602	1.17906	0.0222426	-0.00954183	0.0127007	0.0127007	0.177734	0.0248667	12.4807	16613603	423661	0.822266	0.17378
2013	126	SC Firm 126	2	UK	1	MAN	9000	TECH	1	0.199524	0.0244462	0.00319222	0.000286827	0.179565	7.29543	13.9836	0.0205078	0.0131075	2.1599	0.0433376	-0.00559287	0.0377447	0.0377447	0.199524	0.0244462	18.1951	24235972	541216	0.800476	0.197021
2014	126	SC Firm 126	2	UK	1	MAN	9000	TECH	1	0.167919	0.0244462	0.00423398	0.000437466	0.18305	7.29543	14.0293	0.0236229	0.00254114	2.94025	-0.0212479	0.0203444	-0.000903479	-0.000903479	0.167919	0.0244462	15.4951	23128583	480425	0.832081	0.164598
2004	127	SC Firm 127	2	UK	1	MAN	1000	BMAT	1	0.221011	0.0828169	0	0	0.317499	2.66867	11.9629	0.480366	0.00188264	2.48846	0.0766987	0.0444807	0.121179	0.121179	0.221011	0.0828169	7.44335	455488	41128.2	0.778989	0.280099
2005	127	SC Firm 127	2	UK	1	MAN	1000	BMAT	1	0.207243	0.048981	0	0	0.304539	4.23108	12.0894	0.496742	0.00141638	2.99636	0.0257173	0.0398481	0.0655654	0.0655654	0.207243	0.048981	11.1886	911681	46955	0.792757	0.281918
2006	127	SC Firm 127	2	UK	1	MAN	1000	BMAT	1	0.244237	0.0626096	0	0	0.303372	3.90096	12.3431	0.504552	0.00174743	2.66182	0.0935997	0.0385712	0.132171	0.132171	0.244237	0.0626096	15.3627	1139829	76130.7	0.755763	0.318621
2007	127	SC Firm 127	2	UK	1	MAN	1000	BMAT	1	0.203158	0.0709799	0.0216986	0.00660281	0.296831	2.8622	12.4995	0.583029	0.00410365	2.58604	0.0108973	0.0146523	0.0255496	0.0255496	0.203158	0.0709799	13.9484	1052915	80445.8	0.796842	0.250959
2008	127	SC Firm 127	2	UK	1	MAN	1000	BMAT	1	0.18766	0.060224	0	0	0.278428	3.11604	12.4355	0.58161	0.0144898	-0.466877	-0.0143609	-0.0203428	-0.0347037	-0.0347037	0.18766	0.060224	6.85986	1166094	74727.2	0.81234	0.253254
2009	127	SC Firm 127	2	UK	1	MAN	1000	BMAT	1	0.168089	0.0618448	0	0	0.154218	2.71792	12.0207	0.586022	0.0924801	-4.19194	-0.0432333	0.0189073	-0.024326	-0.024326	0.168089	0.0618448	12.772	901663	59439.2	0.831911	0.238633
2010	127	SC Firm 127	2	UK	1	MAN	1000	BMAT	1	0.186484	0.0458366	0	0	0.299501	4.06844	12.6038	0.449255	0.109517	1.54018	0.0508737	0.0139381	0.0648117	0.0648117	0.186484	0.0458366	22.5803	1701500	81737.6	0.813516	0.242595
2011	127	SC Firm 127	2	UK	1	MAN	1000	BMAT	1	0.178596	0.0523818	0	0	0.356498	3.40951	12.7256	0.436067	0.0406336	1.9724	-0.00367185	0.00105055	-0.0026213	-0.0026213	0.178596	0.0523818	16.6194	1448893	80091	0.821404	0.230021
2012	127	SC Firm 127	2	UK	1	MAN	1000	BMAT	1	0.124655	0.0361508	0	0	0.318084	3.44818	12.7807	0.440897	0.0263833	1.17906	-0.0274765	0.01685	-0.0106265	-0.0106265	0.124655	0.0361508	25.6814	1749705	65625.7	0.875345	0.167639
2013	127	SC Firm 127	2	UK	1	MAN	1000	BMAT	1	0.104189	0.0282481	0	0	0.282372	3.68837	12.7914	0.477965	0.0226842	2.1599	-0.00611934	0.0124041	0.00628475	0.00628475	0.104189	0.0282481	29.6865	2132328	61985.1	0.895811	0.146627
2014	127	SC Firm 127	2	UK	1	MAN	1000	BMAT	1	0.108335	0.0312753	0	0	0.27264	3.46393	12.9227	0.546721	0.00559325	2.94025	0.0164922	0.00574121	0.0222334	0.0222334	0.108335	0.0312753	31.6479	2264698	73115.8	0.891665	0.151093
2009	128	SC Firm 128	2	UK	1	MAN	9000	TECH	1	0.282014	0.0732511	0	0	0.230633	3.84997	12.3248	0.0317954	0.0252747	-4.19194	-0.0402488	0.013326	-0.0269228	-0.0269228	0.282014	0.0732511	25.276	1287468	101763	0.717986	0.288014
2010	128	SC Firm 128	2	UK	1	MAN	9000	TECH	1	0.282002	0.0692597	0	0	0.194144	4.07166	12.5387	0.0270195	0.0266385	1.54018	0.0598602	0.0236259	0.0834862	0.0834862	0.282002	0.0692597	22.3027	1736034	129185	0.717998	0.291804
2011	128	SC Firm 128	2	UK	1	MAN	9000	TECH	1	0.279908	0.0730866	0	0	0.203013	3.82982	12.6562	0.0259316	0.00531106	1.9724	0.0197214	-0.0118229	0.00789852	0.00789852	0.279908	0.0730866	35.5995	1762554	138976	0.720092	0.28589
2012	128	SC Firm 128	2	UK	1	MAN	9000	TECH	1	0.284625	0.0594497	0	0	0.198426	4.78766	12.7212	0.0258022	0.00364985	1.17906	0.0268129	0.00200341	0.0288163	0.0288163	0.284625	0.0594497	35.8272	2427409	153430	0.715375	0.290493
2009	129	SC Firm 129	2	UK	1	MAN	3000	CGOODS	1	0.285095	0.347014	0.0938898	0.12133	0.0845083	0.821564	13.9493	0.00747944	0.0730368	-4.19194	-0.250069	-0.0181385	-0.268208	-0.268208	0.285095	0.347014	13.214	1210714	643406	0.714905	0.211017
2010	129	SC Firm 129	2	UK	1	MAN	3000	CGOODS	1	0.256707	0.333343	0.0881034	0.122715	0.0378673	0.7701	14.0019	0.00747944	0.0326755	1.54018	-0.0379305	0.0254721	-0.0124584	-0.0124584	0.256707	0.333343	10.4513	1121106	560577	0.743293	0.185013
2011	129	SC Firm 129	2	UK	1	MAN	3000	CGOODS	1	0.270244	0.340758	0.0852195	0.115068	0.0521021	0.793066	14.1904	0.00747944	0.0100946	1.9724	0.0381216	0.00539007	0.0435117	0.0435117	0.270244	0.340758	11.0686	1262620	652641	0.729756	0.202306
2012	129	SC Firm 129	2	UK	1	MAN	3000	CGOODS	1	0.269781	0.300609	0.0674785	0.0776475	0.0748867	0.897448	14.2693	0.00747944	0.0161061	1.17906	0.0015023	-0.00404053	-0.00253823	-0.00253823	0.269781	0.300609	16.8034	1526923	656295	0.730219	0.216942
2013	129	SC Firm 129	2	UK	1	MAN	3000	CGOODS	1	0.262011	0.199128	0.0394041	0.0279255	0.092925	1.31579	14.3396	0.00747944	0.0125086	2.1599	0.000693155	-0.00189423	-0.00120108	-0.00120108	0.262011	0.199128	25.9929	2646547	658036	0.737989	0.231738
2014	129	SC Firm 129	2	UK	1	MAN	3000	CGOODS	1	0.30382	0.247767	0.021488	0.0163037	0.131712	1.22623	14.7346	0.00747944	0.0274101	2.94025	0.105208	0.0101603	0.115368	0.115368	0.30382	0.247767	30.1959	3056107	1.00661e+06	0.69618	0.288532
2005	130	SC Firm 130	2	UK	1	MAN	3000	CGOODS	1	0.32344	0.215477	0.136851	0.083485	0.143181	1.50104	13.7068	0.0165852	0.0299228	2.99636	-0.0374055	-0.0202097	-0.0576152	-0.0576152	0.32344	0.215477	13.7173	1791880	492157	0.67656	0.216172
2006	130	SC Firm 130	2	UK	1	MAN	3000	CGOODS	1	0.284311	0.185426	0.110685	0.0665712	0.150756	1.53329	13.9725	0.0156034	0.00544463	2.66182	0.0190223	0.0366138	0.0556361	0.0556361	0.284311	0.185426	21.2333	2317072	527447	0.715689	0.195235
2007	130	SC Firm 130	2	UK	1	MAN	3000	CGOODS	1	0.242302	0.23966	0.0580323	0.0572475	0.131713	1.01103	13.9135	0.015129	0.0133982	2.58604	-0.0359196	-0.00763855	-0.0435582	-0.0435582	0.242302	0.23966	12.2259	1457329	459351	0.757698	0.195622
2008	130	SC Firm 130	2	UK	1	MAN	3000	CGOODS	1	0.28175	0.273758	0.150173	0.145159	-0.0340192	1.02919	12.931	0.0140258	0.122145	-0.466877	-0.075016	-0.0898537	-0.16487	-0.16487	0.28175	0.273758	5.85409	962364	362765	0.71825	0.154828
2009	130	SC Firm 130	2	UK	1	MAN	3000	CGOODS	1	0.15381	0.197758	0.00336306	0.00455539	0.0221992	0.77777	13.0275	0.0141413	0.0450946	-4.19194	-0.120569	0.0918023	-0.0287668	-0.0287668	0.15381	0.197758	7.02216	824957	203357	0.84619	0.150954
2010	130	SC Firm 130	2	UK	1	MAN	3000	CGOODS	1	0.237369	0.280732	0.0211047	0.0263238	0.0238923	0.845538	13.0516	0.0121312	0.00137904	1.54018	0.0975003	-0.00572584	0.0917745	0.0917745	0.237369	0.280732	6.45639	884223	345114	0.762631	0.220927
2011	130	SC Firm 130	2	UK	1	MAN	3000	CGOODS	1	0.266384	0.306435	0.00735994	0.00894117	0.037364	0.8693	13.2476	0.0116944	0.00947656	1.9724	0.0426925	-0.00145609	0.0412364	0.0412364	0.266384	0.306435	6.82295	930185	410980	0.733616	0.260945
2012	130	SC Firm 130	2	UK	1	MAN	3000	CGOODS	1	0.261162	0.265579	0.00679285	0.00694816	0.0560995	0.983371	13.4467	0.0115959	0.0131562	1.17906	0.0149349	0.00904156	0.0239764	0.0239764	0.261162	0.265579	9.34428	1205444	435908	0.738838	0.256109
2013	130	SC Firm 130	2	UK	1	MAN	3000	CGOODS	1	0.260901	0.220429	0.0355379	0.0286689	0.0766325	1.18361	13.7327	0.012338	0.0143816	2.1599	0.0207329	0.00794056	0.0286735	0.0286735	0.260901	0.220429	13.1289	1674724	473539	0.739099	0.233668
2014	130	SC Firm 130	2	UK	1	MAN	3000	CGOODS	1	0.326045	0.25207	0.0506992	0.0358712	0.106881	1.29347	14.047	0.0104522	0.0211454	2.94025	0.0929305	-0.0158911	0.0770394	0.0770394	0.326045	0.25207	13.7743	1965190	662314	0.673955	0.290051
2009	131	SC Firm 131	2	UK	0	SERV	4000	HCARE	1	0.200643	0.114465	0.00520208	0.0026857	0.0546624	1.75288	11.9153	0.0340836	0.00274882	-4.19194	-0.0469237	0.0428042	-0.00411959	-0.00411959	0.200643	0.114465	3.60959	732909	94736.4	0.799357	0.303859
2010	131	SC Firm 131	2	UK	0	SERV	4000	HCARE	1	0.134084	0.0821309	0.00680911	0.00394607	0.0388946	1.63256	12.0928	0.0513818	0.0176335	1.54018	0.0131103	0.0276487	0.0407591	0.0407591	0.134084	0.0821309	4.87331	1173484	105003	0.865916	0.190993
2011	131	SC Firm 131	2	UK	0	SERV	4000	HCARE	1	0.127323	0.0570165	0	0	0.115856	2.23309	12.6616	0.0440886	0.0579205	1.9724	-0.002345	0.0076594	0.0053144	0.0053144	0.127323	0.0570165	5.3953	1705220	103104	0.872677	0.196916
2012	131	SC Firm 131	2	UK	0	SERV	4000	HCARE	1	0.122041	0.0519525	0	0	0.0785465	2.34908	12.7806	0.0466141	0.0215501	1.17906	-0.00243565	-0.000396509	-0.00283216	-0.00283216	0.122041	0.0519525	9.51143	1844667	101087	0.877959	0.202422
2013	131	SC Firm 131	2	UK	0	SERV	4000	HCARE	1	0.127722	0.0445671	0	0	0.0991991	2.86584	13.0899	0.0439792	0.0116085	2.1599	0.0424767	0.197922	0.240399	0.240399	0.127722	0.0445671	12.3805	3246949	151457	0.872278	0.254742
2014	131	SC Firm 131	2	UK	0	SERV	4000	HCARE	1	0.12898	0.0463173	0	0	0.0645377	2.7847	13.2084	0.0339421	0.0206507	2.94025	0.0312401	0.194179	0.225419	0.225419	0.12898	0.0463173	10.1471	4115300	199867	0.87102	0.274692
2008	132	SC Firm 132	2	UK	1	MAN	1000	BMAT	1	0.171844	0.0630524	0	0	0.281518	2.72541	13.4877	0.414383	0.0154057	-0.466877	-0.250069	0.410394	0.160325	0.160325	0.171844	0.0630524	3.33834	3067883	206455	0.828156	0.247917
2009	132	SC Firm 132	2	UK	1	MAN	1000	BMAT	1	0.160223	0.0284215	0	0	0.320415	5.63739	13.6529	0.446249	0.0272531	-4.19194	0.0264522	0.0470516	0.0735038	0.0735038	0.160223	0.0284215	12.6964	8453175	247280	0.839777	0.23794
2010	132	SC Firm 132	2	UK	1	MAN	1000	BMAT	1	0.177479	0.0244462	0	0	0.397801	7.29543	14.1588	0.381532	0.0549293	1.54018	0.0721577	0.064794	0.136952	0.136952	0.177479	0.0244462	25.8205	17773463	416696	0.822521	0.270095
2004	133	SC Firm 133	3	CA	1	MAN	1000	BMAT	1	0.0846403	0.0244462	0	0	0.145778	3.73917	12.1601	0.37768	0.0678331	3.13879	-0.0426532	0.0934017	0.0507485	0.0507485	0.0846403	0.0244462	15.015	2570037	53059	0.91536	0.176288
2005	133	SC Firm 133	3	CA	1	MAN	1000	BMAT	1	0.0895475	0.0489255	0	0	0.132937	1.83028	13.7062	0.733104	0.011046	3.16313	0.076498	0.410394	0.486892	0.486892	0.0895475	0.0489255	22.2834	7077826	364100	0.910453	0.268618
2006	133	SC Firm 133	3	CA	1	MAN	1000	BMAT	1	0.105466	0.0854142	0.0544243	0.0436035	0.0515254	1.23477	14.3159	0.825809	0.0460201	2.62178	0.0852003	0.410394	0.495595	0.495595	0.105466	0.0854142	28.4206	20288872	1894800	0.894534	0.254143
2007	133	SC Firm 133	3	CA	1	MAN	1000	BMAT	1	0.109845	0.0932541	0.0593745	0.0499788	0.0568483	1.17791	14.6071	0.851046	0.00161231	2.00831	0.00986693	0.0243296	0.0341966	0.0341966	0.109845	0.0932541	33.9221	20242140	2081800	0.890155	0.259004
2008	133	SC Firm 133	3	CA	1	MAN	1000	BMAT	1	0.0846403	0.0283316	0.000291385	0.00018893	0.0557167	1.5191	14.6991	0.879052	0.00202041	1.17543	-0.0665211	-0.00166303	-0.0681841	-0.0681841	0.0846403	0.0283316	31.5577	28047450	817800	0.91536	0.212462
2009	133	SC Firm 133	3	CA	1	MAN	1000	BMAT	1	0.0866354	0.0678054	0.0370266	0.0286408	0.0654647	1.27771	14.8175	0.828567	0.00770455	-2.71147	0.0475972	0.0331811	0.0807783	0.0807783	0.0866354	0.0678054	39.3136	24951389	1814900	0.913365	0.225303
2010	133	SC Firm 133	3	CA	1	MAN	1000	BMAT	1	0.0963132	0.0718706	0.0270723	0.0198165	0.0733022	1.34009	15.1341	0.795036	0.00790208	3.37425	0.0306487	0.208502	0.239151	0.239151	0.0963132	0.0718706	46.0319	34376809	2662000	0.903687	0.267412
2011	133	SC Firm 133	3	CA	1	MAN	1000	BMAT	1	0.0865391	0.0648183	0.0267329	0.0196994	0.103152	1.3351	15.4948	0.771873	0.0198023	2.9601	-0.00408525	0.0103493	0.00626404	0.00626404	0.0865391	0.0648183	44.354	36675292	2542000	0.913461	0.250732
2012	133	SC Firm 133	3	CA	1	MAN	1000	BMAT	1	0.0913199	0.0871511	0.0270625	0.025744	0.0774718	1.04783	15.3545	0.771555	0.0148054	1.92286	0.00926434	0.00022596	0.0094903	0.0094903	0.0913199	0.0871511	36.8612	29631848	2829000	0.90868	0.241454
2006	134	SC Firm 134	3	CA	1	MAN	1000	BMAT	1	0.0846403	0.0374373	0.0126271	0.00754619	0.128181	1.64004	11.3336	0.00747944	0.00533999	2.62178	-0.0476152	-0.0198977	-0.0675128	-0.0675128	0.0846403	0.0374373	10.175	691227	26884.1	0.91536	0.277876
2007	134	SC Firm 134	3	CA	1	MAN	1000	BMAT	1	0.0846403	0.0244462	0.00274715	0.00104204	0.0990885	2.56188	11.3336	0.00747944	0.0194785	2.00831	-0.00454329	0.0978821	0.0933389	0.0933389	0.0846403	0.0244462	22.7572	1283470	24564.4	0.91536	0.248934
2008	134	SC Firm 134	3	CA	1	MAN	1000	BMAT	1	0.0886258	0.0558129	0	0	0.235271	1.58791	11.8079	0.00747944	0.0958593	1.17543	0.0347166	-0.168558	-0.133841	-0.133841	0.0886258	0.0558129	8.3769	683168	40383.5	0.911374	0.27464
2009	134	SC Firm 134	3	CA	1	MAN	1000	BMAT	1	0.0846403	0.0244462	0	0	0.111342	2.28159	11.3336	0.00747944	0.0873493	-2.71147	-0.0383979	0.109114	0.0707158	0.0707158	0.0846403	0.0244462	19.8635	1150578	20672	0.91536	0.234828
2006	135	SC Firm 135	3	CA	1	MAN	1000	BMAT	1	0.161961	0.115876	0.0187742	0.0128093	0.10084	1.39772	13.1988	0.575759	0.0124138	2.62178	0.11754	0.410394	0.527935	0.527935	0.161961	0.115876	12.3033	3555549	466000	0.838039	0.244237
2007	135	SC Firm 135	3	CA	1	MAN	1000	BMAT	1	0.152924	0.185379	0.0233191	0.0292169	0.131155	0.824926	13.8735	0.467819	0.0133606	2.00831	0.0540031	0.367952	0.421955	0.421955	0.152924	0.185379	9.57447	3165682	720399	0.847076	0.227931
2008	135	SC Firm 135	3	CA	1	MAN	1000	BMAT	1	0.226246	0.590662	0.099075	0.351784	0.0780585	0.751684	13.6355	0.364849	0.0497911	1.17543	0.03178	-0.0450776	-0.0132976	-0.0132976	0.226246	0.590662	0.978216	580835	838128	0.773754	0.212056
2009	135	SC Firm 135	3	CA	1	MAN	1000	BMAT	1	0.156896	0.222537	0.05708	0.08518	0.0967343	0.751684	13.5225	0.350331	0.0196836	-2.71147	-0.0671942	0.0570168	-0.0101774	-0.0101774	0.156896	0.222537	4.08823	2050107	586812	0.843104	0.169516
2010	135	SC Firm 135	3	CA	1	MAN	1000	BMAT	1	0.114947	0.10006	0.0115768	0.00992733	0.11211	1.14878	13.6521	0.326512	0.0204918	3.37425	-0.038415	-0.0866	-0.125015	-0.125015	0.114947	0.10006	7.28404	3955770	439824	0.885053	0.165451
2011	135	SC Firm 135	3	CA	1	MAN	1000	BMAT	1	0.0960644	0.141205	0.00833114	0.0128312	0.085027	0.751684	13.5719	0.321434	0.0247722	2.9601	-0.0177521	-0.0199662	-0.0377184	-0.0377184	0.0960644	0.141205	3.79672	2257741	371224	0.903936	0.138995
2012	135	SC Firm 135	3	CA	1	MAN	1000	BMAT	1	0.0918718	0.109366	0.00275795	0.00334563	0.0619065	0.840041	13.4885	0.318464	0.00989207	1.92286	-0.00115626	0.00189452	0.000738262	0.000738262	0.0918718	0.109366	5.16077	2985531	366610	0.908128	0.126619
2013	135	SC Firm 135	3	CA	1	MAN	1000	BMAT	1	0.140534	0.188843	0.0566566	0.0787754	0.0808782	0.751684	13.4978	0.402722	0.0121725	2.00351	0.0578151	0.0109596	0.0687747	0.0687747	0.140534	0.188843	4.33145	2675381	622847	0.859466	0.120403
2004	136	SC Firm 136	3	CA	1	MAN	1000	BMAT	1	0.165794	0.0599154	0.000867325	0.000278301	0.0385559	2.76713	11.4598	0.622855	0.0227968	3.13879	-0.0415903	0.274844	0.233254	0.233254	0.165794	0.0599154	15.9877	962719	61358	0.834206	0.254811
2005	136	SC Firm 136	3	CA	1	MAN	1000	BMAT	1	0.200293	0.0574227	0.000434717	0.000105775	0.0601496	3.48804	11.7151	0.710445	0.0104768	3.16313	0.0309264	0.0268108	0.0577371	0.0577371	0.200293	0.0574227	18.8506	1191084	72562	0.799707	0.289367
2006	136	SC Firm 136	3	CA	1	MAN	1000	BMAT	1	0.175692	0.0576971	0.00125261	0.000360167	0.163486	3.04508	12.4508	0.595794	0.0804108	2.62178	0.0689829	0.31272	0.381703	0.381703	0.175692	0.0576971	25.2361	1951171	119470	0.824308	0.245981
2007	136	SC Firm 136	3	CA	1	MAN	1000	BMAT	1	0.1502	0.0480965	0	0	0.154047	3.12289	12.6151	0.655764	0.0153277	2.00831	-0.00639924	-0.00140254	-0.00780178	-0.00780178	0.1502	0.0480965	35.1164	2267874	114588	0.8498	0.214032
2008	136	SC Firm 136	3	CA	1	MAN	1000	BMAT	1	0.162987	0.0772812	0	0	0.139632	2.10901	12.7326	0.798116	0.0208466	1.17543	0.0317867	0.0665413	0.098328	0.098328	0.162987	0.0772812	17.2709	1699625	142350	0.837013	0.21496
2009	136	SC Firm 136	3	CA	1	MAN	1000	BMAT	1	0.107648	0.0841113	0.0124449	0.00950226	0.0968831	1.27983	13.0276	0.788552	0.0245156	-2.71147	0.0306441	0.410394	0.441038	0.441038	0.107648	0.0841113	23.8258	2166902	198999	0.892352	0.261835
2010	136	SC Firm 136	3	CA	1	MAN	1000	BMAT	1	0.199928	0.0774548	0.00392227	0.00132125	0.164328	2.58122	13.3794	0.667889	0.0443348	3.37425	0.0854816	-0.126505	-0.0410238	-0.0410238	0.199928	0.0774548	41.0655	4140583	347634	0.800072	0.22542
2011	136	SC Firm 136	3	CA	1	MAN	1000	BMAT	1	0.155261	0.115013	0.0188435	0.0133978	0.236496	1.34994	13.6592	0.609545	0.0562176	2.9601	-0.0228487	-0.016638	-0.0394867	-0.0394867	0.155261	0.115013	21.8581	2331777	303038	0.844739	0.167175
2012	136	SC Firm 136	3	CA	1	MAN	1000	BMAT	1	0.105523	0.11251	0.0250398	0.0268578	0.104927	0.9379	13.7414	0.649631	0.0848003	1.92286	0.016253	0.394528	0.410781	0.410781	0.105523	0.11251	18.7884	2825607	358211	0.894477	0.178635
2013	136	SC Firm 136	3	CA	1	MAN	1000	BMAT	1	0.108105	0.137769	0.0254857	0.0333262	0.0876791	0.78468	13.6225	0.675956	0.0251744	2.00351	-0.0213322	-0.0166521	-0.0379843	-0.0379843	0.108105	0.137769	11.6855	1872391	299175	0.891895	0.188105
2014	136	SC Firm 136	3	CA	1	MAN	1000	BMAT	1	0.146049	0.168164	0.0338832	0.0398055	0.0611218	0.868492	13.5304	0.627587	0.0358128	2.43931	-0.00221322	-0.0613408	-0.063554	-0.063554	0.146049	0.168164	9.22706	1457797	294709	0.853951	0.195427
2007	137	SC Firm 137	3	CA	1	MAN	1	OILGAS	1	0.27407	0.313219	0.124845	0.146995	0.0221208	0.875009	12.3483	0.580811	0.0567132	2.00831	-0.250069	0.0449404	-0.205129	-0.205129	0.27407	0.313219	13.7495	783932	357527	0.72593	0.197382
2008	137	SC Firm 137	3	CA	1	MAN	1	OILGAS	1	0.245422	0.336602	0.112477	0.165069	0.146886	0.751684	12.4301	0.669345	0.0863109	1.17543	-0.134578	-0.0324763	-0.167054	-0.167054	0.245422	0.336602	5.64735	455089	230908	0.754578	0.224207
2009	137	SC Firm 137	3	CA	1	MAN	1	OILGAS	1	0.261232	0.237992	0.131288	0.117766	0.010257	1.09765	11.8428	0.649956	0.112664	-2.71147	0.0408372	0.0933827	0.13422	0.13422	0.261232	0.237992	13.976	876317	273694	0.738768	0.186964
2004	138	SC Firm 138	3	CA	1	MAN	1	OILGAS	1	0.125773	0.0270262	0.00732693	0.00142304	0.397801	4.65375	11.5289	0.702752	0.0131142	3.13879	-0.0198851	0.0250317	0.00514664	0.00514664	0.125773	0.0270262	7.69039	523315	14536.1	0.874227	0.168101
2005	138	SC Firm 138	3	CA	1	MAN	1	OILGAS	1	0.217881	0.0433059	0.0886628	0.0155624	0.397801	5.03122	11.9264	0.667568	0.0125256	3.16313	0.139773	0.0224782	0.162251	0.162251	0.217881	0.0433059	12.4322	895770	40548.1	0.782119	0.169612
2006	138	SC Firm 138	3	CA	1	MAN	1	OILGAS	1	0.130514	0.0322904	0	0	0.397801	4.04188	12.2381	0.633013	0.00637842	2.62178	-0.0438879	0.042568	-0.00131994	-0.00131994	0.130514	0.0322904	11.382	909384	30344.2	0.869486	0.146389
2007	138	SC Firm 138	3	CA	1	MAN	1	OILGAS	1	0.0846403	0.0281302	0	0	0.397801	2.87465	12.3771	0.636565	0.0697716	2.00831	-0.0190552	0.0199296	0.000874436	0.000874436	0.0846403	0.0281302	12.5351	848434	24557.4	0.91536	0.105343
2008	138	SC Firm 138	3	CA	1	MAN	1	OILGAS	1	0.121848	0.0359788	0	0	0.350296	3.38666	12.3903	0.484785	0.0325113	1.17543	0.0518878	0.128663	0.180551	0.180551	0.121848	0.0359788	11.5495	1146014	42771.1	0.878152	0.169612
2009	138	SC Firm 138	3	CA	1	MAN	1	OILGAS	1	0.116361	0.0502028	0	0	0.0961493	2.31782	11.8399	0.457463	0.129833	-2.71147	-0.004215	-0.0124239	-0.0166389	-0.0166389	0.116361	0.0502028	11.0763	780908	41275.9	0.883639	0.17358
2010	138	SC Firm 138	3	CA	1	MAN	1	OILGAS	1	0.217155	0.0756386	0	0	0.269443	2.87095	12.4308	0.402609	0.129833	3.37425	0.114838	-0.0151278	0.0997102	0.0997102	0.217155	0.0756386	14.0062	1070576	87603.1	0.782845	0.229799
2011	138	SC Firm 138	3	CA	1	MAN	1	OILGAS	1	0.183612	0.0770015	0	0	0.377755	2.38453	12.7355	0.401418	0.0721158	2.9601	-0.0122501	0.00207356	-0.0101765	-0.0101765	0.183612	0.0770015	11.7728	984401	82124	0.816388	0.194411
2012	138	SC Firm 138	3	CA	1	MAN	1	OILGAS	1	0.239736	0.0774879	0	0	0.365219	3.09385	12.8729	0.357614	0.0167929	1.92286	0.0729082	-0.0020665	0.0708417	0.0708417	0.239736	0.0774879	17.2866	1404988	118014	0.760264	0.24506
2013	138	SC Firm 138	3	CA	1	MAN	1	OILGAS	1	0.161108	0.0347253	0	0	0.386738	4.63949	12.8468	0.411776	0.0153833	2.00351	-0.119982	0.0390741	-0.0809081	-0.0809081	0.161108	0.0347253	21.6384	1880230	67640.3	0.838892	0.178092
2014	138	SC Firm 138	3	CA	1	MAN	1	OILGAS	1	0.12297	0.0355607	0	0	0.397801	3.45803	12.9709	0.411082	0.0496748	2.43931	-0.0148816	0.101347	0.0864654	0.0864654	0.12297	0.0355607	18.8415	1636432	60338.3	0.87703	0.151812
2008	139	SC Firm 139	3	CA	1	MAN	1000	BMAT	1	0.301123	0.159602	0.298461	0.157909	0.0825674	1.88671	12.0241	0.885766	0.00665093	1.17543	-0.0343306	0.0696827	0.0353521	0.0353521	0.301123	0.159602	6.57624	2014719	382621	0.698877	0.0775952
2009	139	SC Firm 139	3	CA	1	MAN	1000	BMAT	1	0.229436	0.103006	0.225985	0.101207	0.0707529	2.22741	12.3854	0.861995	0.0105155	-2.71147	0.0584108	0.320923	0.379333	0.379333	0.229436	0.103006	15.0979	4469911	513299	0.770564	0.0775952
2010	139	SC Firm 139	3	CA	1	MAN	1000	BMAT	1	0.141388	0.0280613	0.138169	0.0273403	0.11989	5.03855	12.956	0.725844	0.0323005	3.37425	-0.0533839	0.204374	0.150991	0.150991	0.141388	0.0280613	39.1091	12905897	372612	0.858612	0.0775952
2011	139	SC Firm 139	3	CA	1	MAN	1000	BMAT	1	0.0846403	0.0244462	0.0731272	0.0196552	0.215348	3.71226	13.5008	0.651639	0.0688069	2.9601	-0.0537869	-0.0346415	-0.0884284	-0.0884284	0.0846403	0.0244462	28.9414	10444722	218118	0.91536	0.0775952
2012	139	SC Firm 139	3	CA	1	MAN	1000	BMAT	1	0.0846403	0.0244462	0.0158098	0.00392981	0.219868	4.0013	13.6525	0.715269	0.00510276	1.92286	-0.0454969	-2.41429e-05	-0.0455211	-0.0455211	0.0846403	0.0244462	36.1455	12688477	73013	0.91536	0.0775952
2013	139	SC Firm 139	3	CA	1	MAN	1000	BMAT	1	0.232607	0.117969	0.22857	0.115622	0.121201	1.97177	13.468	0.885766	0.0705832	2.00351	0.215974	0.00841283	0.224387	0.224387	0.232607	0.117969	20.1977	7634650	1021107	0.767393	0.0775952
2014	139	SC Firm 139	3	CA	1	MAN	1000	BMAT	1	0.219048	0.11638	0.215747	0.114399	0.09285	1.88218	13.3378	0.885766	0.0212076	2.43931	-0.000650205	0.0331291	0.0324789	0.0324789	0.219048	0.11638	20.3391	7729853	1018085	0.780952	0.0775952
2004	140	SC Firm 140	3	CA	1	MAN	1000	BMAT	1	0.183226	0.0350574	0.0162861	0.0026741	-0.0340192	5.22646		0.144668	0.109962	3.13879	-0.102164	0.26428	0.162116	0.162116	0.183226	0.0350574	6.76169	1897607	68942	0.816774	0.170969
2005	140	SC Firm 140	3	CA	1	MAN	1000	BMAT	1	0.102931	0.0244462	0.0140932	0.00239162	-0.0340192	5.45186		0.216004	0.043161	3.16313	-0.0708228	0.348804	0.277981	0.277981	0.102931	0.0244462	6.75461	2122344	40841	0.897069	0.090902
2006	140	SC Firm 140	3	CA	1	MAN	1000	BMAT	1	0.0846403	0.0244462	0.00771371	0.00135829	-0.0340192	5.38918		0.145051	0.0291804	2.62178	0.0110942	0.410394	0.421489	0.421489	0.0846403	0.0244462	9.2812	3740807	48642	0.91536	0.0775952
2004	141	SC Firm 141	3	CA	1	MAN	2000	IND	1	0.0846403	0.0458929	0	0	0.0951097	1.40894	11.5648	0.27221	0.00461269	3.13879	-0.0369755	-0.0582173	-0.0951928	-0.0951928	0.0846403	0.0458929	10.409	660046	31748.4	0.91536	0.15185
2005	141	SC Firm 141	3	CA	1	MAN	2000	IND	1	0.105546	0.0738726	0	0	0.157703	1.42876	11.8916	0.239236	0.0442419	3.16313	0.0435186	-0.207669	-0.164151	-0.164151	0.105546	0.0738726	10.2899	677277	54023.1	0.894454	0.105546
2006	141	SC Firm 141	3	CA	1	MAN	2000	IND	1	0.102674	0.0651763	0	0	0.152892	1.57533	11.8399	0.217968	0.00239652	2.62178	-0.00740144	-0.148986	-0.156388	-0.156388	0.102674	0.0651763	10.1202	722752	50390.6	0.897326	0.102674
2007	141	SC Firm 141	3	CA	1	MAN	2000	IND	1	0.12192	0.0754088	0	0	0.135812	1.61679	11.9987	0.212253	0.0112728	2.00831	0.0391075	-0.045894	-0.00678659	-0.00678659	0.12192	0.0754088	14.5424	909612	74187.1	0.87808	0.133033
2008	141	SC Firm 141	3	CA	1	MAN	2000	IND	1	0.1453	0.0932955	0	0	0.264966	1.55742	12.288	0.186296	0.0917065	1.17543	-0.00147111	-0.208	-0.209471	-0.209471	0.1453	0.0932955	7.89149	713770	73443.5	0.8547	0.159436
2009	141	SC Firm 141	3	CA	1	MAN	2000	IND	1	0.111975	0.0690765	0	0	0.200533	1.62102	12.1937	0.178347	0.0447625	-2.71147	-0.0149185	-0.1721	-0.187018	-0.187018	0.111975	0.0690765	13.5957	873410	64808.9	0.888025	0.126233
2008	142	SC Firm 142	3	CA	1	MAN	1000	BMAT	1	0.109608	0.128602	0.0626801	0.0742199	0.0470058	0.852303	13.7635	0.867021	0.000883954	1.17543	-0.0196297	-0.0791983	-0.098828	-0.098828	0.109608	0.128602	7.76819	6934807	1023451	0.890392	0.243246
2009	142	SC Firm 142	3	CA	1	MAN	1000	BMAT	1	0.11316	0.131742	0.0579379	0.0681487	0.0592896	0.858951	13.9838	0.861476	0.00498472	-2.71147	0.00772824	0.0135388	0.0212671	0.0212671	0.11316	0.131742	11.409	7239591	1098471	0.88684	0.250235
2010	142	SC Firm 142	3	CA	1	MAN	1000	BMAT	1	0.119953	0.122279	0.0512489	0.0523219	0.086048	0.980977	14.3384	0.834577	0.0149909	3.37425	0.0135023	0.0203202	0.0338225	0.0338225	0.119953	0.122279	12.8123	8884993	1237802	0.880047	0.270283
2011	142	SC Firm 142	3	CA	1	MAN	1000	BMAT	1	0.122969	0.105581	0.0438626	0.0371862	0.1187	1.16469	14.5918	0.83932	0.0196378	2.9601	0.00803783	-0.00250131	0.00553652	0.00553652	0.122969	0.105581	14.7356	11219230	1324369	0.877031	0.268516
2008	143	SC Firm 143	3	CA	1	MAN	1000	BMAT	1	0.0846403	0.0693327	0.0172442	0.0331765	-0.0340192	0.751684		0.366384	0.0272051	1.17543	-0.0532598	0.3921	0.33884	0.33884	0.0846403	0.0693327	0.378134	74982	5586	0.91536	0.0980864
2009	143	SC Firm 143	3	CA	1	MAN	1000	BMAT	1	0.145844	0.113698	0.0439086	0.0333532	-0.0279518	1.28273	11.3336	0.688511	0.0226005	-2.71147	0.123261	0.373675	0.496936	0.496936	0.145844	0.113698	1.15041	281214	36075	0.854156	0.153577
2010	143	SC Firm 143	3	CA	1	MAN	1000	BMAT	1	0.113502	0.0426688	0.000343698	0.000119673	0.123076	2.66008	11.756	0.528567	0.078224	3.37425	0.0057044	0.197461	0.203165	0.203165	0.113502	0.0426688	2.69891	852221	37984	0.886498	0.132737
2011	143	SC Firm 143	3	CA	1	MAN	1000	BMAT	1	0.115466	0.0519009	0	0	0.202257	2.22474	12.3254	0.732694	0.0574166	2.9601	0.0480036	0.257635	0.305638	0.305638	0.115466	0.0519009	3.0413	1187607	65012	0.884534	0.162777
2012	143	SC Firm 143	3	CA	1	MAN	1000	BMAT	1	0.121765	0.0556402	0	0	0.178493	2.18844	12.4648	0.639686	0.0176991	1.92286	0.0256599	0.0693162	0.0949761	0.0949761	0.121765	0.0556402	3.58835	1398034	82370	0.878235	0.172245
2013	143	SC Firm 143	3	CA	1	MAN	1000	BMAT	1	0.198839	0.238689	0.144838	0.176247	0.0769477	0.833046	13.2072	0.656908	0.0635295	2.00351	0.163177	0.410394	0.573571	0.573571	0.198839	0.238689	2.05273	1464843	459264	0.801161	0.144027
2014	143	SC Firm 143	3	CA	1	MAN	1000	BMAT	1	0.269486	0.267481	0.196833	0.195224	0.061873	1.0075	13.0952	0.813183	0.0219424	2.43931	0.0527084	0.172973	0.225682	0.225682	0.269486	0.267481	1.63539	1563546	570932	0.730514	0.127076
2009	144	SC Firm 144	3	CA	1	MAN	1	OILGAS	1	0.175426	0.117683	0.103735	0.0676534	0.0845254	1.49068	13.4349	0.885766	0.122416	-2.71147	-0.0043866	0.410394	0.406008	0.406008	0.175426	0.117683	37.5452	6801869	907226	0.824574	0.173148
2010	144	SC Firm 144	3	CA	1	MAN	1	OILGAS	1	0.233606	0.143982	0.141862	0.0835966	0.0970832	1.62246	13.9665	0.885766	0.00289066	3.37425	0.119779	0.322528	0.442306	0.442306	0.233606	0.143982	44.3363	11069462	1.86188e+06	0.766394	0.181944
2011	144	SC Firm 144	3	CA	1	MAN	1	OILGAS	1	0.254779	0.143844	0.144455	0.0766179	0.145043	1.77122	14.3498	0.885766	0.0188442	2.9601	0.0374997	0.0939002	0.1314	0.1314	0.254779	0.143844	44.0498	12994453	2.18322e+06	0.745221	0.203661
2012	144	SC Firm 144	3	CA	1	MAN	1	OILGAS	1	0.226198	0.163647	0.135756	0.0951397	0.145878	1.38224	14.6968	0.885766	0.00350741	1.92286	0.0476592	0.316377	0.364036	0.364036	0.226198	0.163647	37.9196	14136289	2.76601e+06	0.773802	0.169988
2013	144	SC Firm 144	3	CA	1	MAN	1	OILGAS	1	0.264754	0.163658	0.156243	0.0914296	0.16788	1.61773	14.8139	0.885766	0.00215638	2.00351	0.0341225	0.004572	0.0386945	0.0386945	0.264754	0.163658	38.8418	16226511	3.17525e+06	0.735246	0.196486
2010	145	SC Firm 145	3	CA	1	MAN	9000	TECH	1	0.113927	0.0601111	0	0	0.122784	1.89527	11.5046	0.030294	0.0244305	3.37425	0.0297137	0.0595642	0.0892779	0.0892779	0.113927	0.0601111	7.1814	429783	27487	0.886073	0.148191
2011	145	SC Firm 145	3	CA	1	MAN	9000	TECH	1	0.118235	0.0575662	0	0	0.130981	2.0539	11.6439	0.0358677	0.00702324	2.9601	0.0120769	0.00966307	0.02174	0.02174	0.118235	0.0575662	9.33374	501191	30614	0.881765	0.155907
2012	145	SC Firm 145	3	CA	1	MAN	9000	TECH	1	0.116795	0.0521157	0	0	0.132688	2.24108	11.751	0.0370726	0.00304799	1.92286	0.005918	-0.00595421	-3.62178e-05	-3.62178e-05	0.116795	0.0521157	13.3804	586529	32248	0.883205	0.13715
2013	145	SC Firm 145	3	CA	1	MAN	9000	TECH	1	0.233673	0.0809876	0.132742	0.0423609	0.123596	2.8853	11.927	0.0255227	0.00660708	2.00351	0.140059	0.0305129	0.170572	0.170572	0.233673	0.0809876	14.8477	913423	80495	0.766327	0.156504
2014	145	SC Firm 145	3	CA	1	MAN	9000	TECH	1	0.099473	0.0365257	0	0	0.113602	2.72337	12.0486	0.0176249	0.00296209	2.43931	-0.08174	0.272341	0.190601	0.190601	0.099473	0.0365257	20.1171	1165536	44186	0.900527	0.121152
2005	146	SC Firm 146	3	CA	1	MAN	1000	BMAT	1	0.205744	0.0997645	0.144605	0.0674442	0.0914987	2.06229	12.4144	0.446153	0.0111916	3.16313	0.0102636	0.219071	0.229334	0.229334	0.205744	0.0997645	19.8056	1812120	200820	0.794256	0.194603
2006	146	SC Firm 146	3	CA	1	MAN	1000	BMAT	1	0.0846403	0.0244462	0	0	0.185752	3.39716	13.0948	0.400137	0.0737907	2.62178	-0.0666637	0.332001	0.265337	0.265337	0.0846403	0.0244462	41.279	5069339	99392	0.91536	0.176855
2007	146	SC Firm 146	3	CA	1	MAN	1000	BMAT	1	0.0846403	0.0285345	0.00380217	0.0014792	0.083515	2.46551	13.0421	0.680601	0.0677306	2.00831	0.0340179	0.369852	0.40387	0.40387	0.0846403	0.0285345	54.6166	6551942	192448	0.91536	0.243779
2008	146	SC Firm 146	3	CA	1	MAN	1000	BMAT	1	0.135447	0.0449197	0.0670056	0.0211051	0.0280728	3.01532	12.8184	0.801633	0.0395903	1.17543	0.07849	0.091145	0.169635	0.169635	0.135447	0.0449197	51.5988	9730576	457652	0.864553	0.192752
2004	147	SC Firm 147	3	CA	1	MAN	1000	BMAT	1	0.0846403	0.0244462	0	0	-0.0340192	3.31181	11.3336	0.331536	0.0320949	3.13879	0.000203307	0.301407	0.30161	0.30161	0.0846403	0.0244462	2.95145	734626	14700	0.91536	0.0852916
2005	147	SC Firm 147	3	CA	1	MAN	1000	BMAT	1	0.267376	0.0582982	0.17874	0.0356039	-0.0340192	4.58636	11.3336	0.654547	0.0291399	3.16313	0.221544	0.226184	0.447728	0.447728	0.267376	0.0582982	4.89547	1385248	85757	0.732624	0.139265
2006	147	SC Firm 147	3	CA	1	MAN	1000	BMAT	1	0.213223	0.0565447	0.137672	0.0341028	0.0121988	3.77089	11.3467	0.590262	0.0816284	2.62178	0.0505028	0.334653	0.385156	0.385156	0.213223	0.0565447	5.41631	1874959	112373	0.786777	0.123176
2007	147	SC Firm 147	3	CA	1	MAN	1000	BMAT	1	0.195663	0.0638836	0.121068	0.0372047	0.118966	3.0628	12.1479	0.638293	0.0539129	2.00831	0.00576096	0.0422803	0.0480412	0.0480412	0.195663	0.0638836	5.85106	1696608	115782	0.804337	0.130128
2008	147	SC Firm 147	3	CA	1	MAN	1000	BMAT	1	0.0846403	0.0244462	0.000163145	3.90575e-05	0.154713	3.98978	12.5715	0.738162	0.0289225	1.17543	-0.0687852	0.234431	0.165646	0.165646	0.0846403	0.0244462	7.93259	3558718	53506	0.91536	0.125264
2009	147	SC Firm 147	3	CA	1	MAN	1000	BMAT	1	0.11794	0.0579137	0.059292	0.0281619	0.0519867	2.03648	12.7896	0.751087	0.060291	-2.71147	0.102369	0.410394	0.512763	0.512763	0.11794	0.0579137	14.1852	6592325	405256	0.88206	0.175916
2010	147	SC Firm 147	3	CA	1	MAN	1000	BMAT	1	0.106808	0.0397144	0.0481907	0.0172093	0.116615	2.6894	13.5813	0.732569	0.0323675	3.37425	-0.00315572	0.0229429	0.0197872	0.0197872	0.106808	0.0397144	18.5613	9517796	393626	0.893192	0.151267
2011	147	SC Firm 147	3	CA	1	MAN	1000	BMAT	1	0.0931892	0.0454747	0.022065	0.0103516	0.163167	2.04926	13.9142	0.719096	0.0322092	2.9601	-0.00620113	0.0106305	0.00442934	0.00442934	0.0931892	0.0454747	13.7545	7746816	369067	0.906811	0.157715
2012	147	SC Firm 147	3	CA	1	MAN	1000	BMAT	1	0.149083	0.114624	0.0808387	0.0610222	0.0741673	1.30063	13.9531	0.740243	0.0512202	1.92286	0.102532	0.371169	0.473701	0.473701	0.149083	0.114624	12.9019	9129621	1181953	0.850917	0.17729
2013	147	SC Firm 147	3	CA	1	MAN	1000	BMAT	1	0.161874	0.214026	0.0902277	0.122675	0.0714769	0.756331	13.9324	0.785652	0.00618808	2.00351	-0.00148606	0.00775952	0.00627346	0.00627346	0.161874	0.214026	5.67797	4301035	1171201	0.838126	0.195169
2014	147	SC Firm 147	3	CA	1	MAN	1000	BMAT	1	0.169326	0.215796	0.0894769	0.117123	0.0596904	0.784657	13.8812	0.806587	0.0107153	2.43931	0.0109191	-0.00161368	0.00930543	0.00930543	0.169326	0.215796	6.09399	4549541	1251933	0.830674	0.205257
2010	148	SC Firm 148	3	CA	1	MAN	1	OILGAS	1	0.0846403	0.0244462	0	0	0.397801	1.28905	12.7044	0.00747944	0.129833	3.37425	-0.250069	-0.0264528	-0.276522	-0.276522	0.0846403	0.0244462	18.1599	588172	65.2152	0.91536	0.0775952
2011	148	SC Firm 148	3	CA	1	MAN	1	OILGAS	1	0.0846403	0.0244462	0	0		1.02048	11.3336	0.00747944	0.129833	2.9601	0.00870333	0.410394	0.419098	0.419098	0.0846403	0.0244462	19.7194	800056	6947.91	0.91536	0.0775952
2012	148	SC Firm 148	3	CA	1	MAN	1	OILGAS	1	0.0846403	0.0244462	0	0		0.990836	11.3336	0.00747944	0.00159241	1.92286	-0.000373945	0.369155	0.368781	0.368781	0.0846403	0.0244462	24.3221	1246167	6475.15	0.91536	0.0775952
2013	148	SC Firm 148	3	CA	1	MAN	1	OILGAS	1	0.0846403	0.0244462	0	0		1.05714	11.3589	0.00747944	0.0140628	2.00351	0.00296927	-0.00765831	-0.00468904	-0.00468904	0.0846403	0.0244462	22.2693	1330521	10241.1	0.91536	0.0775952
2014	148	SC Firm 148	3	CA	1	MAN	1	OILGAS	1	0.0846403	0.0244462	0	0		1.04162	11.3598	0.00747944	0.023062	2.43931	-0.000357593	0.410394	0.410037	0.410037	0.0846403	0.0244462	34.7306	2545615	9363.92	0.91536	0.0775952
2007	149	SC Firm 149	3	CA	1	MAN	1	OILGAS	1	0.190439	0.147521	0.0754134	0.0566054	0.266188	1.29093	14.275	0.778468	0.0564876	2.00831	-0.0119294	-0.023131	-0.0350603	-0.0350603	0.190439	0.147521	15.3051	1973195	341460	0.809561	0.237543
2008	149	SC Firm 149	3	CA	1	MAN	1	OILGAS	1	0.197878	0.152335	0.0953919	0.071339	0.22143	1.29896	14.1534	0.763759	0.0347041	1.17543	0.0124114	0.0361684	0.0485798	0.0485798	0.197878	0.152335	10.8672	2027199	364311	0.802122	0.22284
2009	149	SC Firm 149	3	CA	1	MAN	1	OILGAS	1	0.156203	0.142848	0.0862592	0.0783294	0.139921	1.09349	13.8939	0.789543	0.0549144	-2.71147	-0.0244016	-0.0109717	-0.0353733	-0.0353733	0.156203	0.142848	14.2613	1890667	315088	0.843797	0.198836
2010	149	SC Firm 149	3	CA	1	MAN	1	OILGAS	1	0.183433	0.159325	0.0806108	0.0688766	0.142494	1.15131	14.1231	0.777532	0.00476236	3.37425	0.0423181	0.0455169	0.087835	0.087835	0.183433	0.159325	15.0798	2161136	409579	0.816567	0.232757
2004	150	SC Firm 150	3	CA	1	MAN	1	OILGAS	1	0.19073	0.0740696	0.138228	0.0516319	0.310056	2.57501	11.3336	0.885766	0.00316943	3.13879	0.0617381	0.118584	0.180322	0.180322	0.19073	0.0740696	14.5078	412315	32983	0.80927	0.0777833
2005	150	SC Firm 150	3	CA	1	MAN	1	OILGAS	1	0.244674	0.131572	0.209638	0.110366	0.224632	1.85962	11.6501	0.885766	0.0485531	3.16313	0.172894	0.410394	0.583288	0.583288	0.244674	0.131572	16.1834	742068	112428	0.755326	0.0775952
2006	150	SC Firm 150	3	CA	1	MAN	1	OILGAS	1	0.265585	0.145615	0.223075	0.119191	0.258188	1.82388	11.6912	0.885766	0.00805681	2.62178	-0.0106079	0.00261242	-0.00799546	-0.00799546	0.265585	0.145615	12.7124	634325	108110	0.734415	0.0775952
2004	151	SC Firm 151	3	CA	1	MAN	3000	CGOODS	1	0.272418	0.144287	0.137271	0.0668647	0.187748	1.88802	13.187	0.433074	0.00683232	3.13879	-0.0227271	0.0598073	0.0370803	0.0370803	0.272418	0.144287	4.24011	789732	133162	0.727582	0.21405
2005	151	SC Firm 151	3	CA	1	MAN	3000	CGOODS	1	0.243625	0.0637611	0.101629	0.0233605	0.214865	3.82091	13.3906	0.436164	0.0210837	3.16313	0.020766	0.0171544	0.0379203	0.0379203	0.243625	0.0637611	10.7545	2137482	145570	0.756375	0.210587
2006	151	SC Firm 151	3	CA	1	MAN	3000	CGOODS	1	0.225734	0.0542694	0.0625426	0.012961	0.230456	4.15951	13.5583	0.418481	0.0106797	2.62178	0.0244692	0.00170474	0.026174	0.026174	0.225734	0.0542694	11.6931	2845203	163268	0.774266	0.214787
2007	151	SC Firm 151	3	CA	1	MAN	3000	CGOODS	1	0.212953	0.0443761	0.0797677	0.0146587	0.222028	4.79881	13.7793	0.431816	0.0037666	2.00831	0.0262508	-0.00201947	0.0242314	0.0242314	0.212953	0.0443761	20.544	4010272	186224	0.787047	0.172874
2008	151	SC Firm 151	3	CA	1	MAN	3000	CGOODS	1	0.233913	0.0829845	0.0594297	0.0183823	0.22983	2.81875	14.0384	0.398641	0.00215246	1.17543	0.0638468	0.00621912	0.070066	0.070066	0.233913	0.0829845	5.83231	2830426	256137	0.766087	0.210467
2009	151	SC Firm 151	3	CA	1	MAN	3000	CGOODS	1	0.137608	0.0688396	0.00471201	0.00218868	0.153947	1.99896	13.8531	0.374317	0.058829	-2.71147	-0.100771	-0.00703957	-0.10781	-0.10781	0.137608	0.0688396	12.2172	2000019	147859	0.862392	0.148279
2010	151	SC Firm 151	3	CA	1	MAN	3000	CGOODS	1	0.152378	0.058569	0	0	0.216837	2.60169	14.0867	0.36104	0.0489303	3.37425	0.0409994	0.000271933	0.0412713	0.0412713	0.152378	0.058569	14.2219	3251538	202287	0.847622	0.160526
2011	151	SC Firm 151	3	CA	1	MAN	3000	CGOODS	1	0.288099	0.139405	0.136417	0.0594695	0.17762	2.06663	14.3612	0.296112	0.0203935	2.9601	0.179255	-0.00765026	0.171605	0.171605	0.288099	0.139405	9.39861	3305405	535432	0.711901	0.182087
2012	151	SC Firm 151	3	CA	1	MAN	3000	CGOODS	1	0.247884	0.110665	0.112608	0.0457207	0.141169	2.23994	14.4824	0.291303	0.0326676	1.92286	-0.034452	-0.00455908	-0.0390111	-0.0390111	0.247884	0.110665	18.3096	3777816	470096	0.752116	0.152442
2013	151	SC Firm 151	3	CA	1	MAN	3000	CGOODS	1	0.15865	0.0523758	0	0	0.218605	3.02907	14.5968	0.32093	0.0581907	2.00351	-0.0713776	0.00805568	-0.063322	-0.063322	0.15865	0.0523758	26.6525	5866139	324225	0.84135	0.15865
2014	151	SC Firm 151	3	CA	1	MAN	3000	CGOODS	1	0.219496	0.0785446	0.0719892	0.0229727	0.180593	2.79454	14.6742	0.33695	0.0199864	2.43931	0.0944593	0.000736586	0.0951958	0.0951958	0.219496	0.0785446	28.2751	6677193	569162	0.780504	0.159084
2004	152	SC Firm 152	4	JP	1	MAN	2000	IND	1	0.111162	0.0530566	0	0	0.160517	2.09515	13.6368	0.0669939	0.00424369	2.36073	-0.00197016	-0.0046961	-0.00666626	-0.00666626	0.111162	0.0530566	127.043	4106877	230106	0.888838	0.120387
2005	152	SC Firm 152	4	JP	1	MAN	2000	IND	1	0.132287	0.0495506	0	0	0.171525	2.66974	13.696	0.0706578	0.00839885	1.30273	0.0262859	0.0136864	0.0399723	0.0399723	0.132287	0.0495506	108.114	5508247	287166	0.867713	0.144256
2006	152	SC Firm 152	4	JP	1	MAN	2000	IND	1	0.107445	0.0518983	0	0	0.169915	2.07029	13.7958	0.0839942	0.0030744	1.6929	-0.0171283	0.00409065	-0.0130377	-0.0130377	0.107445	0.0518983	109.327	4524770	247682	0.892555	0.116973
2006	153	SC Firm 153	4	JP	0	SERV	4000	HCARE	1	0.250298	0.102007	0.0410115	0.0143419	0.222346	2.45373	13.7397	0.272758	0.0130318	1.6929	-0.0699433	0.0150863	-0.054857	-0.054857	0.250298	0.102007	30.2088	2625661	298261	0.749702	0.236509
2007	153	SC Firm 153	4	JP	0	SERV	4000	HCARE	1	0.229749	0.100436	0.0160384	0.00606425	0.231164	2.28751	13.9522	0.269116	0.00634675	2.19219	0.0228969	-0.0203844	0.00251243	0.00251243	0.229749	0.100436	40.5405	2967105	331276	0.770251	0.231645
2008	153	SC Firm 153	4	JP	0	SERV	4000	HCARE	1	0.251059	0.128424	0.0151241	0.00670468	0.235096	1.95492	14.061	0.240548	0.000179613	-1.04164	0.0583458	-0.018216	0.0401299	0.0401299	0.251059	0.128424	32.4465	2928963	431573	0.748941	0.252467
2009	153	SC Firm 153	4	JP	0	SERV	4000	HCARE	1	0.301043	0.174491	0.12205	0.0638671	0.187089	1.72526	14.1948	0.238798	0.0327838	-5.52698	0.102921	-0.0138408	0.0890802	0.0890802	0.301043	0.174491	41.9426	3102409	655768	0.698957	0.230697
2010	153	SC Firm 153	4	JP	0	SERV	4000	HCARE	1	0.258528	0.150489	0.0624631	0.0327416	0.18148	1.71792	14.333	0.22723	0.00208006	4.65203	-0.0167403	-0.030032	-0.0467723	-0.0467723	0.258528	0.150489	42.3707	3476697	615888	0.741472	0.230342
2011	153	SC Firm 153	4	JP	0	SERV	4000	HCARE	1	0.213735	0.110199	0.038574	0.0179511	0.170297	1.93953	14.3441	0.224843	0.00723878	-0.452725	-0.0456802	-0.0286364	-0.0743166	-0.0743166	0.213735	0.110199	49.8779	4097297	507437	0.786265	0.199764
2012	153	SC Firm 153	4	JP	0	SERV	4000	HCARE	1	0.208596	0.0868622	0.0175821	0.00641748	0.158695	2.40146	14.2492	0.201825	0.0114912	1.75369	-0.0106664	0.047214	0.0365476	0.0365476	0.208596	0.0868622	50.4042	5074919	482752	0.791404	0.205108
2013	153	SC Firm 153	4	JP	0	SERV	4000	HCARE	1	0.208988	0.114766	0.0138455	0.00684229	0.105677	1.82098	14.2074	0.172045	0.0299377	1.61337	0.0138569	0.0583285	0.0721854	0.0721854	0.208988	0.114766	31.7261	3988059	517033	0.791012	0.212871
2014	153	SC Firm 153	4	JP	0	SERV	4000	HCARE	1	0.20028	0.128654	0.0111546	0.00660662	0.0985846	1.55673	14.0867	0.157662	0.00283972	-0.1045	-0.0161949	0.0523109	0.0361161	0.0361161	0.20028	0.128654	42.3272	3239774	478353	0.79972	0.216655
2011	154	SC Firm 154	4	JP	1	MAN	2000	IND	1	0.330428	0.1801	0.209449	0.105489	0.152438	1.83469	15.2923	0.188451	0.0448604	-0.452725	-0.0185006	-0.0126306	-0.0311312	-0.0311312	0.330428	0.1801	19.6605	10451809	2.29586e+06	0.669572	0.153657
2012	154	SC Firm 154	4	JP	1	MAN	2000	IND	1	0.234903	0.156002	0.117992	0.0745342	0.137121	1.50577	15.1904	0.227715	0.0118206	1.75369	-0.114963	0.080724	-0.034239	-0.034239	0.234903	0.156002	27.7889	8339559	1.54146e+06	0.765097	0.136046
2013	154	SC Firm 154	4	JP	1	MAN	2000	IND	1	0.234061	0.10527	0.105215	0.043312	0.156882	2.22344	15.2371	0.183893	0.0152648	1.61337	0.00820959	0.0530662	0.0612758	0.0612758	0.234061	0.10527	34.363	13577702	1.59749e+06	0.765939	0.148129
2014	154	SC Firm 154	4	JP	1	MAN	2000	IND	1	0.192867	0.0637633	0.0649316	0.0194076	0.187394	3.02474	15.2213	0.174711	0.0220152	-0.1045	-0.0686593	0.0246091	-0.0440502	-0.0440502	0.192867	0.0637633	41.3395	17297990	1.1781e+06	0.807133	0.139825
2008	155	SC Firm 155	4	JP	1	MAN	1000	BMAT	1	0.289508	0.242266	0.0561112	0.0445659	0.154363	1.195	15.0871	0.26944	0.0412953	-1.04164	-0.189495	-0.0505019	-0.239997	-0.239997	0.289508	0.242266	20.3331	3110168	994395	0.710492	0.247272
2009	155	SC Firm 155	4	JP	1	MAN	1000	BMAT	1	0.331125	0.200983	0.0536353	0.0279911	0.107437	1.64752	15.0151	0.236427	0.0238194	-5.52698	0.0823378	0.0120896	0.0944274	0.0944274	0.331125	0.200983	18.5798	5261605	1.3235e+06	0.668875	0.293216
2010	155	SC Firm 155	4	JP	1	MAN	1000	BMAT	1	0.326082	0.238418	0.052589	0.0346685	0.148579	1.36769	15.2258	0.204426	0.0366123	4.65203	0.0443289	-0.0110035	0.0333254	0.0333254	0.326082	0.238418	18.4559	4892813	1.53173e+06	0.673918	0.288674
2004	156	SC Firm 156	4	JP	1	MAN	2000	IND	1	0.192802	0.159766	0	0	0.106231	1.20678	14.372	0.660249	0.00491684	2.36073	-0.0226748	-0.00558399	-0.0282588	-0.0282588	0.192802	0.159766	8.8789	2367044	450079	0.807198	0.193054
2005	156	SC Firm 156	4	JP	1	MAN	2000	IND	1	0.187537	0.161376	0.0208388	0.0174329	0.107394	1.16211	14.3221	0.646805	0.00111633	1.30273	-0.012392	-0.00852682	-0.0209188	-0.0209188	0.187537	0.161376	8.18419	2193962	422183	0.812463	0.171008
2006	156	SC Firm 156	4	JP	1	MAN	2000	IND	1	0.187162	0.16247	0.0213958	0.0180864	0.110744	1.15198	14.3795	0.636329	0.00264371	1.6929	0.00813449	-0.000422719	0.00771177	0.00771177	0.187162	0.16247	7.18792	2275231	441365	0.812838	0.170305
2007	156	SC Firm 156	4	JP	1	MAN	2000	IND	1	0.181085	0.203844	0	0	0.115901	0.888352	14.5986	0.627624	0.00213065	2.19219	0.0262105	0.0218873	0.0480978	0.0480978	0.181085	0.203844	8.83917	2015586	516061	0.818915	0.181539
2008	156	SC Firm 156	4	JP	1	MAN	2000	IND	1	0.161305	0.191032	0	0	0.1139	0.84439	14.6056	0.633845	0.00287055	-1.04164	-0.0207048	-0.0282238	-0.0489286	-0.0489286	0.161305	0.191032	7.34372	1936776	457355	0.838695	0.16143
2009	156	SC Firm 156	4	JP	1	MAN	2000	IND	1	0.15587	0.181296	0	0	0.100122	0.859758	14.5452	0.606876	0.00699362	-5.52698	0.0080559	0.00684662	0.0149025	0.0149025	0.15587	0.181296	8.36399	2177908	482281	0.84413	0.156185
2010	156	SC Firm 156	4	JP	1	MAN	2000	IND	1	0.174796	0.222614	0.0014952	0.0020203	0.103291	0.785197	14.7863	0.580083	0.0043596	4.65203	0.0426538	0.0050145	0.0476683	0.0476683	0.174796	0.222614	8.6301	2227793	637956	0.825204	0.174068
2011	156	SC Firm 156	4	JP	1	MAN	2000	IND	1	0.177065	0.227738	0	0	0.10437	0.777492	14.8545	0.615269	0.00128022	-0.452725	0.0106458	0.0001693	0.0108151	0.0108151	0.177065	0.227738	7.98744	2301698	678766	0.822935	0.177449
2012	156	SC Firm 156	4	JP	1	MAN	2000	IND	1	0.160369	0.182692	0	0	0.0977441	0.877809	14.7181	0.630747	0.00530471	1.75369	-0.0352999	-0.0134996	-0.0487995	-0.0487995	0.160369	0.182692	9.16786	2488770	556312	0.839631	0.160806
2013	156	SC Firm 156	4	JP	1	MAN	2000	IND	1	0.157031	0.169764	0	0	0.0978584	0.924995	14.6507	0.615532	0.000846432	1.61337	-0.0118904	-0.0120576	-0.023948	-0.023948	0.157031	0.169764	9.0072	2529155	517153	0.842969	0.157552
2014	156	SC Firm 156	4	JP	1	MAN	2000	IND	1	0.157574	0.158993	0.000941733	0.000951808	0.0941093	0.991075	14.5195	0.585342	0.000939435	-0.1045	-0.0179741	-0.0238284	-0.0418025	-0.0418025	0.157574	0.158993	8.69782	2455434	464202	0.842426	0.157306
2010	157	SC Firm 157	4	JP	0	SERV	4000	HCARE	1	0.320203	0.212407	0.0146835	0.0084603	0.169562	1.5075	14.2687	0.105362	0.00667665	4.65203	0.00647613	-2.16009e-05	0.00645453	0.00645453	0.320203	0.212407	26.3192	1918317	517354	0.679797	0.310072
2011	157	SC Firm 157	4	JP	0	SERV	4000	HCARE	1	0.311116	0.200995	0.00855408	0.0047828	0.152336	1.54788	14.2757	0.0921496	0.00575988	-0.452725	0.0214974	0.0108546	0.032352	0.032352	0.311116	0.200995	23.8344	2209261	555756	0.688884	0.305173
2012	157	SC Firm 157	4	JP	0	SERV	4000	HCARE	1	0.268825	0.179252	0.0037207	0.00221354	0.126494	1.4997	14.0704	0.0873932	0.0161876	1.75369	-0.0643681	0.0259089	-0.0384591	-0.0384591	0.268825	0.179252	27.9125	2053069	448392	0.731175	0.266094
2013	157	SC Firm 157	4	JP	0	SERV	4000	HCARE	1	0.257233	0.151687	0.00605202	0.00313395	0.124141	1.69581	14.0254	0.0874391	0.00110967	1.61337	-0.0134773	0.0165301	0.00305284	0.00305284	0.257233	0.151687	29.4659	2382791	426068	0.742767	0.25271
2014	157	SC Firm 157	4	JP	0	SERV	4000	HCARE	1	0.236456	0.110059	0.00444345	0.00177922	0.112767	2.14845	13.8817	0.0859921	0.00697914	-0.1045	-0.0382134	0.0259916	-0.0122218	-0.0122218	0.236456	0.110059	41.4142	2965892	366792	0.763544	0.247447
2004	158	SC Firm 158	4	JP	1	MAN	1000	BMAT	1	0.295999	0.270415	0.0848138	0.0755249	0.119824	1.09461	15.0136	0.347943	0.00477591	2.36073	0.0501486	-0.00146922	0.0486794	0.0486794	0.295999	0.270415	10.363	3392614	1.25745e+06	0.704001	0.2469
2005	158	SC Firm 158	4	JP	1	MAN	1000	BMAT	1	0.266975	0.20074	0.0692765	0.0488227	0.131842	1.32995	14.9748	0.331138	0.00345907	1.30273	-0.0403932	-0.00365025	-0.0440434	-0.0440434	0.266975	0.20074	11.7973	4348661	1.0922e+06	0.733025	0.240902
2006	158	SC Firm 158	4	JP	1	MAN	1000	BMAT	1	0.278011	0.238075	0.0707492	0.0581866	0.129188	1.16775	15.0007	0.342351	0.00031939	1.6929	0.0251254	-0.00359238	0.0215331	0.0215331	0.278011	0.238075	12.0746	3842721	1.20071e+06	0.721989	0.244918
2007	158	SC Firm 158	4	JP	1	MAN	1000	BMAT	1	0.291043	0.269866	0.0889713	0.0808214	0.162362	1.07847	15.2468	0.392283	0.0134957	2.19219	0.0466449	-0.0154917	0.0311533	0.0311533	0.291043	0.269866	7.64289	3868586	1.42988e+06	0.708957	0.233402
2008	158	SC Firm 158	4	JP	1	MAN	1000	BMAT	1	0.306279	0.311374	0.17771	0.181225	0.138332	0.983638	15.1537	0.383623	0.0272562	-1.04164	0.00676674	-0.0497134	-0.0429467	-0.0429467	0.306279	0.311374	11.7564	3233725	1.46218e+06	0.693721	0.167625
2004	159	SC Firm 159	4	JP	1	MAN	2000	IND	1	0.271738	0.242309	0.101857	0.088588	0.11414	1.12145	16.2157	0.148378	0.00202737	2.36073	-0.049268	-0.0110533	-0.0603214	-0.0603214	0.271738	0.242309	36.4654	13849935	4.4292e+06	0.728262	0.244342
2005	159	SC Firm 159	4	JP	1	MAN	2000	IND	1	0.26754	0.207955	0.0903805	0.0666607	0.0947041	1.28653	16.1155	0.147731	0.00440483	1.30273	-0.00226797	0.0298327	0.0275647	0.0275647	0.26754	0.207955	47.1389	16727838	4.39197e+06	0.73246	0.259833
2006	159	SC Firm 159	4	JP	1	MAN	2000	IND	1	0.191999	0.168054	0.0162224	0.0138242	0.107465	1.14248	16.2043	0.131852	0.00834359	1.6929	-0.0508059	0.102551	0.0517455	0.0517455	0.191999	0.168054	44.0249	17192814	3.47297e+06	0.808001	0.27577
2012	160	SC Firm 160	4	JP	0	SERV	4000	HCARE	1	0.166931	0.126639	0.0155485	0.0113	0.134312	1.31816	13.9433	0.117502	0.0116861	1.75369	-0.0347471	0.00705787	-0.0276893	-0.0276893	0.166931	0.126639	21.4265	1894085	274647	0.833069	0.153774
2013	160	SC Firm 160	4	JP	0	SERV	4000	HCARE	1	0.186311	0.175144	0.0161827	0.0150245	0.122944	1.06376	13.8921	0.123044	0.00839091	1.61337	0.0189882	-0.0015296	0.0174586	0.0174586	0.186311	0.175144	18.7259	1440259	305815	0.813689	0.172927
2014	160	SC Firm 160	4	JP	0	SERV	4000	HCARE	1	0.174324	0.128797	0.0262388	0.0185188	0.0970101	1.35347	13.7555	0.105648	0.01668	-0.1045	-0.0259917	0.0267344	0.000742639	0.000742639	0.174324	0.128797	21.0142	1800169	266134	0.825676	0.167426
2010	161	SC Firm 161	4	JP	0	SERV	4000	HCARE	1	0.194513	0.240947	0.0132302	0.017319	0.109656	0.807287	15.4444	0.229556	0.0195293	4.65203	0.0130029	0.0933186	0.106321	0.106321	0.194513	0.240947	10.2526	5254495	1.66794e+06	0.805487	0.207251
2011	161	SC Firm 161	4	JP	0	SERV	4000	HCARE	1	0.165161	0.181962	0.0108633	0.0121978	0.12095	0.907666	15.3123	0.186597	0.00461896	-0.452725	-0.0296144	0.00506366	-0.0245508	-0.0245508	0.165161	0.181962	12.2433	6358367	1.41434e+06	0.834839	0.172575
2012	161	SC Firm 161	4	JP	0	SERV	4000	HCARE	1	0.166345	0.177023	0.00996266	0.0107314	0.12635	0.939677	15.1612	0.186757	0.00554482	1.75369	-0.014241	-0.0919882	-0.106229	-0.106229	0.166345	0.177023	9.87095	6056691	1.3028e+06	0.833655	0.174534
2013	161	SC Firm 161	4	JP	0	SERV	4000	HCARE	1	0.157364	0.133147	0.0101375	0.00835291	0.118097	1.18188	14.9894	0.191752	0.00416882	1.61337	-0.0333678	-0.123612	-0.15698	-0.15698	0.157364	0.133147	11.0223	6997981	1.07488e+06	0.842636	0.16515
2014	161	SC Firm 161	4	JP	0	SERV	4000	HCARE	1	0.135624	0.11818	0.00777051	0.00664465	0.10135	1.14761	14.8402	0.211213	0.0153304	-0.1045	-0.04326	-0.0840631	-0.127323	-0.127323	0.135624	0.11818	9.50946	6080809	814940	0.864376	0.151431
2007	162	SC Firm 162	4	JP	0	SERV	5000	CSERV	1	0.230305	0.0244462	0	0	0.355978	7.29543	11.3336	0.00747944	0.00269317	2.19219	0.0789695	0.0390885	0.118058	0.118058	0.230305	0.0244462	2.81531	993105	24201.2	0.769695	0.230305
2008	162	SC Firm 162	4	JP	0	SERV	5000	CSERV	1	0.174475	0.0280008	0	0	0.329692	6.23108	11.3662	0.00747944	0.00981329	-1.04164	-0.0162384	0.0579231	0.0416847	0.0416847	0.174475	0.0280008	2.54164	768570	22140.5	0.825525	0.199282
2009	162	SC Firm 162	4	JP	0	SERV	5000	CSERV	1	0.275031	0.0463725	0	0	0.330042	5.9309	11.7471	0.00878364	0.0515631	-5.52698	0.139489	-0.0137191	0.12577	0.12577	0.275031	0.0463725	4.16973	923879	44925.9	0.724969	0.283683
2010	162	SC Firm 162	4	JP	0	SERV	5000	CSERV	1	0.245013	0.0315569	0	0	0.360221	7.29543	12.0791	0.00818031	0.0664051	4.65203	0.0349845	0.0105235	0.045508	0.045508	0.245013	0.0315569	7.51667	1608377	52409.2	0.754987	0.248255
2011	162	SC Firm 162	4	JP	0	SERV	5000	CSERV	1	0.257551	0.0334874	0	0	0.356468	7.29543	12.3458	0.0125734	0.00484763	-0.452725	0.0690474	0.0213173	0.0903647	0.0903647	0.257551	0.0334874	8.0107	2066702	71606.3	0.742449	0.260654
2012	162	SC Firm 162	4	JP	0	SERV	5000	CSERV	1	0.275121	0.0276067	0	0	0.319685	7.29543	12.5286	0.0124234	0.0228928	1.75369	0.057483	0.00666671	0.0641497	0.0641497	0.275121	0.0276067	12.5297	3188368	90519.2	0.724879	0.276928
2005	163	SC Firm 163	4	JP	1	MAN	3000	CGOODS	1	0.158052	0.0894093	0.00662954	0.00347859	0.133034	1.76774	14.4818	0.181583	0.0110572	1.30273	-0.0634352	0.0466924	-0.0167428	-0.0167428	0.158052	0.0894093	30.6697	4460465	437965	0.841948	0.176734
2006	163	SC Firm 163	4	JP	1	MAN	3000	CGOODS	1	0.165113	0.0911413	0.00628238	0.00319549	0.157384	1.81161	14.6812	0.171997	0.0132272	1.6929	0.0251278	0.0116179	0.0367457	0.0367457	0.165113	0.0911413	42.1146	5151343	516582	0.834887	0.173338
2007	163	SC Firm 163	4	JP	1	MAN	3000	CGOODS	1	0.177904	0.140664	0.00821614	0.00622723	0.196731	1.26474	15.0487	0.178691	0.0284262	2.19219	0.0444901	-0.027295	0.0171951	0.0171951	0.177904	0.140664	21.7878	4208271	688849	0.822096	0.174237
2008	163	SC Firm 163	4	JP	1	MAN	3000	CGOODS	1	0.156281	0.136377	0.0037076	0.00316257	0.176424	1.14595	14.9057	0.215943	0.0167951	-1.04164	-0.0459679	-0.122875	-0.168843	-0.168843	0.156281	0.136377	34.2851	3370747	532285	0.843719	0.154769
2009	163	SC Firm 163	4	JP	1	MAN	3000	CGOODS	1	0.148511	0.106164	0.00310897	0.00211926	0.111428	1.39889	14.7826	0.209239	0.0440843	-5.52698	0.00631059	0.00481468	0.0111253	0.0111253	0.148511	0.106164	40.7162	4680404	555906	0.851489	0.147791
2010	163	SC Firm 163	4	JP	1	MAN	3000	CGOODS	1	0.173452	0.107097	0.00287258	0.00164387	0.132792	1.61958	15.003	0.193387	0.0175539	4.65203	0.0493639	-0.0278317	0.0215322	0.0215322	0.173452	0.107097	32.3759	6478575	777054	0.826548	0.173073
2011	163	SC Firm 163	4	JP	1	MAN	3000	CGOODS	1	0.16144	0.112881	0.00729893	0.00483609	0.145472	1.43019	15.0886	0.202836	0.00995871	-0.452725	-0.00641676	-0.0257774	-0.0321942	-0.0321942	0.16144	0.112881	46.1574	5873351	747349	0.83856	0.155614
2012	163	SC Firm 163	4	JP	1	MAN	3000	CGOODS	1	0.145802	0.0963552	0.00450074	0.00281637	0.11998	1.51317	15.0056	0.195669	0.0167671	1.75369	-0.013828	0.0774703	0.0636424	0.0636424	0.145802	0.0963552	52.4964	6401695	682610	0.854198	0.149052
2013	163	SC Firm 163	4	JP	1	MAN	3000	CGOODS	1	0.149975	0.0911051	0.00934605	0.00533123	0.122392	1.64617	15.1275	0.176456	0.00205474	1.61337	0.0142867	0.0631369	0.0774236	0.0774236	0.149975	0.0911051	45.8731	7526965	754482	0.850025	0.152227
2014	163	SC Firm 163	4	JP	1	MAN	3000	CGOODS	1	0.138679	0.0847423	0.0108251	0.00625381	0.139962	1.63648	15.0546	0.166535	0.0135752	-0.1045	-0.0188456	0.017474	-0.00137161	-0.00137161	0.138679	0.0847423	58.3451	7173891	664219	0.861321	0.145802
2008	164	SC Firm 164	4	JP	0	SERV	5000	CSERV	1	0.301171	0.229041	0.0345354	0.0240652	0.15704	1.31492	15.3163	0.406621	0.010313	-1.04164	0.0260081	0.047606	0.0736141	0.0736141	0.301171	0.229041	19.938	2238070	664901	0.698829	0.278714
2009	164	SC Firm 164	4	JP	0	SERV	5000	CSERV	1	0.25851	0.175187	0.00925624	0.00565955	0.181595	1.47563	15.1765	0.364694	0.0162358	-5.52698	-0.0491166	-0.00630699	-0.0554236	-0.0554236	0.25851	0.175187	19.2408	2630660	558741	0.74149	0.254112
2010	164	SC Firm 164	4	JP	0	SERV	5000	CSERV	1	0.236696	0.163582	0.0251135	0.0159872	0.200831	1.44696	15.1993	0.340246	0.0140373	4.65203	0.0102396	0.040178	0.0504176	0.0504176	0.236696	0.163582	24.9693	2986103	584005	0.763304	0.21957
2011	164	SC Firm 164	4	JP	0	SERV	5000	CSERV	1	0.269854	0.18834	0.0272953	0.017313	0.181138	1.4328	15.184	0.319425	0.00960717	-0.452725	0.0674732	0.0140684	0.0815415	0.0815415	0.269854	0.18834	26.9951	3355891	778711	0.730146	0.251509
2012	164	SC Firm 164	4	JP	0	SERV	5000	CSERV	1	0.244559	0.138807	0.0268466	0.0135491	0.161683	1.76187	15.0386	0.318365	0.012339	1.75369	-0.053868	-0.0347371	-0.088605	-0.088605	0.244559	0.138807	26.5667	3959235	638148	0.755441	0.225543
2013	164	SC Firm 164	4	JP	0	SERV	5000	CSERV	1	0.192716	0.0900962	0.0287865	0.0121447	0.103543	2.139	14.7211	0.354708	0.0392025	1.61337	-0.122429	-0.0599468	-0.182376	-0.182376	0.192716	0.0900962	25.554	3941105	390237	0.807284	0.170725
2014	164	SC Firm 164	4	JP	0	SERV	5000	CSERV	1	0.207952	0.0872109	0.0346117	0.0128789	0.0195376	2.38448	14.4348	0.390294	0.0634625	-0.1045	-0.0404078	-0.0312161	-0.071624	-0.071624	0.207952	0.0872109	22.0157	3419877	326746	0.792048	0.186915
2006	165	SC Firm 165	4	JP	0	SERV	4000	HCARE	1	0.326818	0.216996	0.0809979	0.0479018	0.193182	1.5061	13.9682	0.276173	0.00773003	1.6929	-0.0625069	0.00236767	-0.0601392	-0.0601392	0.326818	0.216996	23.9005	1221790	338597	0.673182	0.267486
2007	165	SC Firm 165	4	JP	0	SERV	4000	HCARE	1	0.329144	0.221871	0.0352665	0.0208026	0.190122	1.48349	14.1772	0.267932	0.00279428	2.19219	0.0662876	0.0217864	0.088074	0.088074	0.329144	0.221871	21.4112	1486972	423986	0.670856	0.308175
2008	165	SC Firm 165	4	JP	0	SERV	4000	HCARE	1	0.297955	0.225389	0.0255634	0.0176679	0.208621	1.32196	14.2011	0.247299	0.00361694	-1.04164	-0.0393764	0.0100529	-0.0293235	-0.0293235	0.297955	0.225389	27.5254	1287055	374494	0.702045	0.281325
2009	165	SC Firm 165	4	JP	0	SERV	4000	HCARE	1	0.30248	0.195126	0.0322071	0.0182646	0.214575	1.55018	14.2824	0.218916	0.0171901	-5.52698	0.0471533	0.0119697	0.0591231	0.0591231	0.30248	0.195126	40.103	1830030	443655	0.69752	0.281135
2010	165	SC Firm 165	4	JP	0	SERV	4000	HCARE	1	0.300258	0.192793	0.0490889	0.0279313	0.216274	1.55741	14.5053	0.22818	0.00102626	4.65203	0.0527995	0.0297142	0.0825137	0.0825137	0.300258	0.192793	39.8362	2253876	538316	0.699742	0.274312
2004	166	SC Firm 166	4	JP	1	MAN	2000	IND	1	0.252924	0.0852691	0.0202819	0.00566778	0.227753	2.96618	13.5426	0.0320916	0.00500582	2.36073	0.0116812	0.0217063	0.0333875	0.0333875	0.252924	0.0852691	7.26481	1310569	122168	0.747076	0.237458
2005	166	SC Firm 166	4	JP	1	MAN	2000	IND	1	0.308242	0.0957749	0.0540881	0.0134099	0.196958	3.21841	13.7055	0.0841126	0.0276632	1.30273	0.124355	0.110831	0.235186	0.235186	0.308242	0.0957749	6.38601	1933406	204785	0.691758	0.268687
2006	166	SC Firm 166	4	JP	1	MAN	2000	IND	1	0.241025	0.101794	0.026139	0.0094878	0.211679	2.36776	13.8186	0.117859	0.0133993	1.6929	-0.0453081	0.02898	-0.0163282	-0.0163282	0.241025	0.101794	5.77521	1521038	172381	0.758975	0.220654
2007	166	SC Firm 166	4	JP	1	MAN	2000	IND	1	0.228621	0.126672	0.0293814	0.0145979	0.201998	1.80483	14.0538	0.144821	0.00670124	2.19219	0.0427982	0.0293111	0.0721092	0.0721092	0.228621	0.126672	3.91744	1462192	212083	0.771379	0.205271
2008	166	SC Firm 166	4	JP	1	MAN	2000	IND	1	0.165222	0.109499	0.0252469	0.0158365	0.162864	1.50889	13.9229	0.150769	0.0341039	-1.04164	-0.0783214	-0.024658	-0.102979	-0.102979	0.165222	0.109499	5.70336	1170093	143879	0.834778	0.143601
2009	166	SC Firm 166	4	JP	1	MAN	2000	IND	1	0.1828	0.0883652	0.0155553	0.00680042	0.12351	2.06869	13.7686	0.147796	0.0274006	-5.52698	0.0381039	0.0167054	0.0548093	0.0548093	0.1828	0.0883652	8.26996	1875237	181768	0.8172	0.169888
2010	166	SC Firm 166	4	JP	1	MAN	2000	IND	1	0.216386	0.110839	0.0105667	0.00479791	0.174301	1.95225	14.1923	0.140157	0.0392119	4.65203	0.0758482	0.0259068	0.101755	0.101755	0.216386	0.110839	7.65964	2245118	279868	0.783614	0.208017
2011	166	SC Firm 166	4	JP	1	MAN	2000	IND	1	0.210696	0.111681	0.0108297	0.00512991	0.174402	1.88658	14.2684	0.136077	0.000612982	-0.452725	0.0104713	-0.0035681	0.00690323	0.00690323	0.210696	0.111681	9.08421	2342497	294504	0.789304	0.202055
2012	166	SC Firm 166	4	JP	1	MAN	2000	IND	1	0.222785	0.11085	0.00935139	0.0040888	0.149704	2.00978	14.1743	0.142441	0.0145128	1.75369	0.0192708	0.0327788	0.0520496	0.0520496	0.222785	0.11085	10.4771	2585952	322391	0.777215	0.234303
2013	166	SC Firm 166	4	JP	1	MAN	2000	IND	1	0.269943	0.143718	0.085869	0.0408951	0.154196	1.87829	14.3374	0.145373	0.00492732	1.61337	0.0660994	0.0145623	0.0806617	0.0806617	0.269943	0.143718	11.1334	2543694	426931	0.730057	0.219184
2014	166	SC Firm 166	4	JP	1	MAN	2000	IND	1	0.261982	0.0969807	0.080982	0.0259671	0.16699	2.70138	14.3673	0.151198	0.00864346	-0.1045	-0.0155476	0.00813804	-0.00740952	-0.00740952	0.261982	0.0969807	13.9929	3752591	403014	0.738018	0.218634
2004	167	SC Firm 167	4	JP	0	SERV	4000	HCARE	1	0.224257	0.180653	0.00805605	0.00615607	0.13285	1.24137	14.2892	0.189451	0.00598511	2.36073	-0.032724	-0.0189464	-0.0516704	-0.0516704	0.224257	0.180653	9.71845	2555264	563395	0.775743	0.236114
2005	167	SC Firm 167	4	JP	0	SERV	4000	HCARE	1	0.188885	0.141566	0.003029	0.00214694	0.123605	1.33426	14.1926	0.166147	0.00368973	1.30273	-0.0471824	-0.00108643	-0.0482688	-0.0482688	0.188885	0.141566	13.0661	2733530	450790	0.811115	0.220736
2006	167	SC Firm 167	4	JP	0	SERV	4000	HCARE	1	0.190191	0.129639	0.000544226	0.000345217	0.125017	1.46709	14.2258	0.152925	0.00410695	1.6929	0.0114713	-0.00692369	0.00454765	0.00454765	0.190191	0.129639	9.40915	3220751	479725	0.809809	0.217733
2007	167	SC Firm 167	4	JP	0	SERV	4000	HCARE	1	0.17495	0.188457	0.0120902	0.0132252	0.088555	0.928327	14.9668	0.172819	0.0249804	2.19219	0.115636	0.410394	0.526031	0.526031	0.17495	0.188457	14.9202	6093298	1.41499e+06	0.82505	0.180711
2008	167	SC Firm 167	4	JP	0	SERV	4000	HCARE	1	0.180845	0.196649	0.01113	0.0123258	0.119997	0.919635	15.2497	0.162561	0.0152758	-1.04164	0.00834226	-0.0102292	-0.0018869	-0.0018869	0.180845	0.196649	12.5568	6060079	1.48342e+06	0.819155	0.186023
2009	167	SC Firm 167	4	JP	0	SERV	4000	HCARE	1	0.144469	0.131002	0.00362312	0.00323574	0.106547	1.1028	15.2812	0.1471	0.00787367	-5.52698	-0.0295149	0.0377599	0.00824498	0.00824498	0.144469	0.131002	16.8138	8170903	1.23177e+06	0.855531	0.155497
2010	167	SC Firm 167	4	JP	0	SERV	4000	HCARE	1	0.142975	0.132653	0.00410337	0.00376313	0.121124	1.07781	15.4099	0.138648	0.0115938	4.65203	0.0178728	0.0651188	0.0829916	0.0829916	0.142975	0.132653	15.8305	9204486	1.40775e+06	0.857025	0.153429
2011	167	SC Firm 167	4	JP	0	SERV	4000	HCARE	1	0.115672	0.118917	0.00298383	0.00307854	0.111766	0.972712	15.4084	0.126754	0.00660526	-0.452725	-0.0264722	0.0034805	-0.0229917	-0.0229917	0.115672	0.118917	13.0915	8487846	1.14557e+06	0.884328	0.124414
2012	167	SC Firm 167	4	JP	0	SERV	4000	HCARE	1	0.127461	0.115956	0.00163162	0.00146527	0.10118	1.09922	15.3085	0.106467	0.00327602	1.75369	0.00297478	-0.0660113	-0.0630365	-0.0630365	0.127461	0.115956	13.942	8942482	1.17295e+06	0.872539	0.135686
2013	167	SC Firm 167	4	JP	0	SERV	4000	HCARE	1	0.120786	0.115878	0.00295633	0.00282083	0.0769801	1.04236	15.2016	0.110934	0.00910662	1.61337	-0.0157506	-0.0550863	-0.0708369	-0.0708369	0.120786	0.115878	14.8167	7916968	1.03764e+06	0.879214	0.133246
2014	167	SC Firm 167	4	JP	0	SERV	4000	HCARE	1	0.140478	0.0998485	0.00128285	0.000871026	0.0937027	1.40691	15.0556	0.099534	0.00125854	-0.1045	0.00635399	-0.079129	-0.072775	-0.072775	0.140478	0.0998485	17.3956	9797657	1.0868e+06	0.859522	0.149893
2004	168	SC Firm 168	4	JP	1	MAN	2000	IND	1	0.293554	0.238664	0.129925	0.101246	0.105331	1.22999	13.2421	0.231828	0.00400131	2.36073	0.00729091	0.0139392	0.0212301	0.0212301	0.293554	0.238664	8.1411	763435	239322	0.706446	0.194866
2005	168	SC Firm 168	4	JP	1	MAN	2000	IND	1	0.276503	0.185562	0.116131	0.0726403	0.108511	1.49008	13.2209	0.234385	0.00139812	1.30273	-0.0229104	0.0188136	-0.00409685	-0.00409685	0.276503	0.185562	8.45866	970017	221010	0.723497	0.18794
2006	168	SC Firm 168	4	JP	1	MAN	2000	IND	1	0.212222	0.150732	0.00242326	0.00159785	0.121643	1.40794	13.3282	0.289936	0.0075367	1.6929	-0.0645162	0.0170885	-0.0474276	-0.0474276	0.212222	0.150732	8.1001	954929	169485	0.787778	0.22448
2007	168	SC Firm 168	4	JP	1	MAN	2000	IND	1	0.166249	0.16118	0.000644596	0.000621178	0.136026	1.03145	13.4899	0.299317	0.00560802	2.19219	-0.0156961	0.0155988	-9.73399e-05	-9.73399e-05	0.166249	0.16118	8.12287	805954	154864	0.833751	0.175746
2008	168	SC Firm 168	4	JP	1	MAN	2000	IND	1	0.175098	0.153922	0.000890025	0.000762899	0.111043	1.13758	13.5045	0.260598	0.0120365	-1.04164	0.0166758	-0.0113072	0.00536859	0.00536859	0.175098	0.153922	8.4541	940864	171166	0.824902	0.18225
2009	168	SC Firm 168	4	JP	1	MAN	2000	IND	1	0.1779	0.153962	0.000247152	0.000207851	0.0686116	1.15548	13.473	0.27909	0.0302631	-5.52698	0.0153428	0.00511647	0.0204593	0.0204593	0.1779	0.153962	8.86272	1029349	187321	0.8221	0.181335
2010	168	SC Firm 168	4	JP	1	MAN	2000	IND	1	0.169486	0.146403	0.000355937	0.000299162	0.0736741	1.15767	13.613	0.278126	0.00229773	4.65203	0.0106588	0.0100649	0.0207237	0.0207237	0.169486	0.146403	9.40992	1165464	199892	0.830514	0.169445
2011	168	SC Firm 168	4	JP	1	MAN	2000	IND	1	0.1949	0.183571	0.000241999	0.000224773	0.0784686	1.06172	13.7112	0.275902	0.00466422	-0.452725	0.0336457	-0.00343738	0.0302084	0.0302084	0.1949	0.183571	8.77029	1074510	241599	0.8051	0.194754
2012	168	SC Firm 168	4	JP	1	MAN	2000	IND	1	0.186981	0.176058	0.000232148	0.000215692	0.0892478	1.06204	13.6289	0.302376	0.0082488	1.75369	-0.0278196	-0.0180865	-0.045906	-0.045906	0.186981	0.176058	8.32778	984233	210309	0.813019	0.187897
2013	168	SC Firm 168	4	JP	1	MAN	2000	IND	1	0.215638	0.190756	0.000216964	0.000186034	0.0949548	1.13044	13.6279	0.29895	0.00427978	1.61337	0.0309386	0.000252248	0.0311908	0.0311908	0.215638	0.190756	10.2377	1041645	245537	0.784362	0.215485
2014	168	SC Firm 168	4	JP	1	MAN	2000	IND	1	0.190697	0.137504	0.000286109	0.000193597	0.089226	1.38684	13.5315	0.303223	0.00475854	-0.1045	-0.0370118	0.0206695	-0.0163422	-0.0163422	0.190697	0.137504	14.2999	1289801	205628	0.809303	0.203034
2008	169	SC Firm 169	4	JP	1	MAN	9000	TECH	1	0.13055	0.0305605	0	0	0.282538	4.27184	11.7112	0.0685503	0.0267827	-1.04164	0.00800381	0.0061997	0.0142035	0.0142035	0.13055	0.0305605	15.8339	633219	19961.6	0.86945	0.13055
2009	169	SC Firm 169	4	JP	1	MAN	9000	TECH	1	0.164728	0.0274156	0.00364011	0.000521917	0.18655	6.00857	11.888	0.0558498	0.0644008	-5.52698	0.0573119	0.0264547	0.0837666	0.0837666	0.164728	0.0274156	10.8413	1085981	30612	0.835272	0.161677
2010	169	SC Firm 169	4	JP	1	MAN	9000	TECH	1	0.242171	0.0910891	0	0	0.185847	2.65861	11.9773	0.0704279	0.00132647	4.65203	0.120469	0.0411166	0.161586	0.161586	0.242171	0.0910891	5.97868	607816	60914	0.757829	0.242171
2011	169	SC Firm 169	4	JP	1	MAN	9000	TECH	1	0.2507	0.125433	0	0	0.149473	1.99868	11.9895	0.0640236	0.0467362	-0.452725	-0.00595811	-0.085937	-0.0918951	-0.0918951	0.2507	0.125433	4.50645	414858	59499.9	0.7493	0.2507
2005	170	SC Firm 170	4	JP	0	SERV	4000	HCARE	1	0.314916	0.186439	0.0508581	0.0260181	0.112424	1.68911	13.3051	0.181917	0.024763	1.30273	-0.0651584	0.00421245	-0.060946	-0.060946	0.314916	0.186439	42.7275	1240825	284353	0.685084	0.278414
2006	170	SC Firm 170	4	JP	0	SERV	4000	HCARE	1	0.31382	0.204725	0.0395539	0.0226557	0.119444	1.53288	13.3516	0.174758	0.00768082	1.6929	0.00852213	0.0214413	0.0299634	0.0299634	0.31382	0.204725	45.402	1135432	292291	0.68618	0.285597
2007	170	SC Firm 170	4	JP	0	SERV	4000	HCARE	1	0.283295	0.227329	0.0223997	0.0167686	0.140522	1.24619	13.524	0.173231	0.0155767	2.19219	0.00148244	-0.0147212	-0.0132388	-0.0132388	0.283295	0.227329	59.9801	998695	293828	0.716705	0.267685
2008	170	SC Firm 170	4	JP	0	SERV	4000	HCARE	1	0.27427	0.186677	0.0196288	0.0120137	0.151568	1.46923	13.5419	0.183726	0.0084659	-1.04164	-0.00951744	-0.0597234	-0.0692409	-0.0692409	0.27427	0.186677	44.9924	1237235	283974	0.72573	0.260912
2009	170	SC Firm 170	4	JP	0	SERV	4000	HCARE	1	0.252412	0.208445	0.0107014	0.00836615	0.157028	1.21093	13.6417	0.168784	0.00368257	-5.52698	0.0040039	0.00774816	0.0117521	0.0117521	0.252412	0.208445	53.3481	1095756	288551	0.747588	0.245327
2004	171	SC Firm 171	4	JP	1	MAN	2000	IND	1	0.149228	0.0867666	0.00783949	0.00426174	0.13153	1.71987	15.1927	0.265337	0.0106915	2.36073	-0.00852379	0.0263888	0.017865	0.017865	0.149228	0.0867666	63.772	12477567	1.1855e+06	0.850772	0.156004
2005	171	SC Firm 171	4	JP	1	MAN	2000	IND	1	0.157882	0.074688	0.0133312	0.00578337	0.148386	2.11389	15.2437	0.25601	0.0120581	1.30273	0.00454057	-0.0225921	-0.0180515	-0.0180515	0.157882	0.074688	67.5573	15122078	1.2206e+06	0.842118	0.158191
2006	171	SC Firm 171	4	JP	1	MAN	2000	IND	1	0.170075	0.0855795	0.0203457	0.00939555	0.160776	1.98733	15.3867	0.279757	0.00914315	1.6929	0.028432	0.0222642	0.0506963	0.0506963	0.170075	0.0855795	56.8636	15660141	1.46561e+06	0.829925	0.172004
2007	171	SC Firm 171	4	JP	1	MAN	2000	IND	1	0.165353	0.143878	0.0276175	0.0235265	0.175558	1.14926	15.6606	0.335953	0.00045892	2.19219	0.0233786	-0.00876684	0.0146117	0.0146117	0.165353	0.143878	38.7683	10156938	1.70695e+06	0.834647	0.156931
2008	171	SC Firm 171	4	JP	1	MAN	2000	IND	1	0.13647	0.122149	0.0146962	0.0129621	0.0818935	1.11724	15.4834	0.361016	0.0921032	-1.04164	-0.0490684	-0.0604181	-0.109487	-0.109487	0.13647	0.122149	49.7512	9023110	1.25552e+06	0.86353	0.124568
2009	171	SC Firm 171	4	JP	1	MAN	2000	IND	1	0.135791	0.0969364	0.00773004	0.00529376	0.104034	1.40082	15.5524	0.307136	0.0330151	-5.52698	0.00945286	0.0172195	0.0266724	0.0266724	0.135791	0.0969364	70.027	12571667	1.34947e+06	0.864209	0.131009
2010	171	SC Firm 171	4	JP	1	MAN	2000	IND	1	0.168534	0.113665	0.00944981	0.00599955	0.140899	1.48273	15.8213	0.28729	0.035077	4.65203	0.0550213	-0.00458075	0.0504405	0.0504405	0.168534	0.113665	51.2087	15623456	2.00357e+06	0.831466	0.161378
2011	171	SC Firm 171	4	JP	1	MAN	2000	IND	1	0.191638	0.146548	0.0439527	0.0322259	0.111099	1.30768	15.7702	0.304664	0.0236545	-0.452725	0.0259094	-0.0217775	0.00413184	0.00413184	0.191638	0.146548	58.1328	13492327	2.3168e+06	0.808362	0.15501
2012	171	SC Firm 171	4	JP	1	MAN	2000	IND	1	0.207242	0.128454	0.0606094	0.0350992	0.120462	1.61335	15.7938	0.297957	0.00636579	1.75369	0.00651474	0.0206189	0.0271336	0.0271336	0.207242	0.128454	88.8255	16229374	2.39199e+06	0.792758	0.156902
2013	171	SC Firm 171	4	JP	1	MAN	2000	IND	1	0.223733	0.117995	0.0558685	0.0267326	0.163043	1.89612	15.9203	0.278585	0.0334378	1.61337	0.0252668	0.0195824	0.0448493	0.0448493	0.223733	0.117995	110.916	20156228	2.69652e+06	0.776267	0.185576
2014	171	SC Firm 171	4	JP	1	MAN	2000	IND	1	0.205586	0.0763166	0.0222441	0.00721092	0.209229	2.69386	15.9774	0.269675	0.0344106	-0.1045	-0.0207155	0.00989589	-0.0108196	-0.0108196	0.205586	0.0763166	145.821	29649265	2.44968e+06	0.794414	0.197264
2005	172	SC Firm 172	4	JP	0	SERV	4000	HCARE	1	0.13958	0.0513283	0.0201529	0.00681299	0.217562	2.71936	11.7426	0.129095	0.00302988	1.30273	0.0460401	0.0117576	0.0577978	0.0577978	0.13958	0.0513283	22.3881	556312	30099.5	0.86042	0.121884
2006	172	SC Firm 172	4	JP	0	SERV	4000	HCARE	1	0.150824	0.042686	0.0175891	0.00447467	0.243452	3.53334	12.0296	0.113034	0.0173174	1.6929	0.0340276	0.00161847	0.0356461	0.0356461	0.150824	0.042686	24.5358	871706	38868.8	0.849176	0.13562
2007	172	SC Firm 172	4	JP	0	SERV	4000	HCARE	1	0.128975	0.0466885	0.0103684	0.0034533	0.235257	2.76246	12.21	0.11588	0.00573407	2.19219	0.00530622	0.00573655	0.0110428	0.0110428	0.128975	0.0466885	25.6775	827696	40536.5	0.871025	0.119849
2008	172	SC Firm 172	4	JP	0	SERV	4000	HCARE	1	0.158754	0.136518	0.080477	0.0683146	0.281767	1.16288	12.4454	0.130847	0.0276603	-1.04164	0.0367833	-0.208	-0.171217	-0.171217	0.158754	0.136518	12.6717	333716	52761.2	0.841246	0.0852068
2009	172	SC Firm 172	4	JP	0	SERV	4000	HCARE	1	0.130666	0.0842175	0.00496919	0.00304619	0.20988	1.55153	12.2789	0.118487	0.0495215	-5.52698	-0.0177186	0.198886	0.181167	0.181167	0.130666	0.0842175	16.0069	505218	46461	0.869334	0.126358
2010	172	SC Firm 172	4	JP	0	SERV	4000	HCARE	1	0.095789	0.066157	0.00387925	0.00259754	0.235501	1.4479	12.5199	0.120387	0.0200735	4.65203	-0.0120849	-0.0351332	-0.0472181	-0.0472181	0.095789	0.066157	21.0939	582353	41256.1	0.904211	0.0922887
2004	173	SC Firm 173	4	JP	1	MAN	3000	CGOODS	1	0.307988	0.281489	0.136414	0.122073	0.123617	1.09414	14.6274	0.275256	0.00807218	2.36073	0.0276486	-0.0112708	0.0163777	0.0163777	0.307988	0.281489	21.6248	2371909	929237	0.692012	0.206903
2005	173	SC Firm 173	4	JP	1	MAN	3000	CGOODS	1	0.305452	0.161358	0.119944	0.0562715	0.152484	1.89301	14.6998	0.260699	0.0190776	1.30273	0.0223725	0.0346299	0.0570024	0.0570024	0.305452	0.161358	18.8219	5211322	1.00268e+06	0.694548	0.234202
2006	173	SC Firm 173	4	JP	1	MAN	3000	CGOODS	1	0.28686	0.201725	0.0966422	0.0629753	0.171125	1.42203	14.8899	0.288245	0.0137464	1.6929	0.00144208	-0.00424794	-0.00280586	-0.00280586	0.28686	0.201725	17.3789	3987881	1.00774e+06	0.71314	0.229663
2007	173	SC Firm 173	4	JP	1	MAN	3000	CGOODS	1	0.304838	0.322771	0.124381	0.133741	0.147153	0.944441	15.0575	0.364424	0.0292529	2.19219	0.0607899	-0.0127971	0.0479928	0.0479928	0.304838	0.322771	7.94196	2641094	1.25876e+06	0.695162	0.207156
2012	174	SC Firm 174	4	JP	1	MAN	1000	BMAT	1	0.311622	0.242089	0.095374	0.0692398	0.115258	1.28722	14.123	0.298983	0.0134411	1.75369	-0.0462604	0.00440371	-0.0418567	-0.0418567	0.311622	0.242089	14.2083	2327438	743423	0.688378	0.258824
2013	174	SC Firm 174	4	JP	1	MAN	1000	BMAT	1	0.307974	0.263898	0.110481	0.0909546	0.140045	1.16702	14.2546	0.303588	0.0151248	1.61337	-0.00186519	-0.000852565	-0.00271775	-0.00271775	0.307974	0.263898	12.6235	2061178	738948	0.692026	0.24189
2014	174	SC Firm 174	4	JP	1	MAN	1000	BMAT	1	0.262724	0.200465	0.0709465	0.0509909	0.124869	1.31057	14.1138	0.307688	0.00958157	-0.1045	-0.0720691	0.0223098	-0.0497592	-0.0497592	0.262724	0.200465	10.5818	2312784	579878	0.737276	0.23966
2007	175	SC Firm 175	4	JP	1	MAN	3000	CGOODS	1	0.279616	0.302071	0.0180689	0.0201061	0.0856758	0.925664	15.2803	0.312399	0.00233458	2.19219	0.0239436	-0.0178256	0.00611801	0.00611801	0.279616	0.302071	10.7288	2471228	1.06957e+06	0.720384	0.307867
2008	175	SC Firm 175	4	JP	1	MAN	3000	CGOODS	1	0.27839	0.264154	0.0121003	0.0112689	0.100191	1.05389	15.3676	0.314524	0.00592729	-1.04164	-0.00665867	-0.043388	-0.0500467	-0.0500467	0.27839	0.264154	11.2267	2909875	1.04459e+06	0.72161	0.297987
2009	175	SC Firm 175	4	JP	1	MAN	3000	CGOODS	1	0.279619	0.263844	0.0108617	0.0100376	0.104905	1.05979	15.3732	0.288047	0.00594105	-5.52698	0.0332791	0.021255	0.0545341	0.0545341	0.279619	0.263844	10.4497	3308258	1.18571e+06	0.720381	0.303645
2010	175	SC Firm 175	4	JP	1	MAN	3000	CGOODS	1	0.254496	0.291569	0.0102653	0.0123501	0.100195	0.872849	15.445	0.283645	0.00141299	4.65203	0.00131384	0.00549805	0.00681188	0.00681188	0.254496	0.291569	10.0218	2895878	1.19186e+06	0.745504	0.275964
2011	175	SC Firm 175	4	JP	1	MAN	3000	CGOODS	1	0.297632	0.323911	0.025472	0.028703	0.0850758	0.918871	15.4904	0.267087	0.00817057	-0.452725	0.069197	0.0114606	0.0806576	0.0806576	0.297632	0.323911	10.3582	3241305	1.55289e+06	0.702368	0.306624
2012	175	SC Firm 175	4	JP	1	MAN	3000	CGOODS	1	0.298681	0.294661	0.0254745	0.0250006	0.0775553	1.01364	15.3917	0.261935	0.00455116	1.75369	-0.0180166	0.00894724	-0.00906935	-0.00906935	0.298681	0.294661	9.39783	3505735	1.46455e+06	0.701319	0.312001
2013	175	SC Firm 175	4	JP	1	MAN	3000	CGOODS	1	0.276359	0.293791	0.0284292	0.03089	0.0776581	0.940665	15.3854	0.273733	0.000179613	1.61337	-0.0444782	0.000817039	-0.0436611	-0.0436611	0.276359	0.293791	9.79407	3032406	1.26152e+06	0.723641	0.288787
2014	175	SC Firm 175	4	JP	1	MAN	3000	CGOODS	1	0.286195	0.266183	0.050948	0.0463181	0.0659249	1.07518	15.2926	0.270708	0.00707877	-0.1045	0.0103321	0.0554059	0.065738	0.065738	0.286195	0.266183	16.491	3608024	1.30877e+06	0.713805	0.293091
2004	176	SC Firm 176	4	JP	1	MAN	3000	CGOODS	1	0.285137	0.223344	0.0116321	0.00841372	0.0986909	1.27667	14.9007	0.208612	0.00896909	2.36073	0.0029557	-0.0029862	-3.0501e-05	-3.0501e-05	0.285137	0.223344	28.9179	3343346	961453	0.714863	0.276723
2005	176	SC Firm 176	4	JP	1	MAN	3000	CGOODS	1	0.27287	0.183762	0.0105839	0.00637655	0.103478	1.48491	14.8213	0.188166	0.00493335	1.30273	-0.0355446	-0.0208197	-0.0563644	-0.0563644	0.27287	0.183762	37.0557	3778409	850646	0.72713	0.274661
2006	176	SC Firm 176	4	JP	1	MAN	3000	CGOODS	1	0.279187	0.183357	0.0126529	0.00737392	0.0972754	1.52265	14.9279	0.228147	0.00352513	1.6929	0.035063	0.039707	0.07477	0.07477	0.279187	0.183357	32.0746	4332809	972822	0.720813	0.304233
2007	176	SC Firm 176	4	JP	1	MAN	3000	CGOODS	1	0.251987	0.205134	0.008543	0.00655774	0.0896337	1.2284	15.1667	0.238872	0.00829546	2.19219	0.00472288	0.00328615	0.00800904	0.00800904	0.251987	0.205134	34.5591	3841552	991404	0.748013	0.274244
2008	176	SC Firm 176	4	JP	1	MAN	3000	CGOODS	1	0.289862	0.233119	0.0358167	0.0269199	0.0771325	1.24341	15.1138	0.247426	0.00908123	-1.04164	0.050116	-0.0308315	0.0192845	0.0192845	0.289862	0.233119	32.7709	3943133	1.19864e+06	0.710138	0.289466
2012	177	SC Firm 177	4	JP	0	SERV	5000	CSERV	1	0.262271	0.160551	0.0746202	0.0415775	0.248813	1.63357	15.1316	0.564459	0.000303379	1.75369	-0.118674	0.00837552	-0.110298	-0.110298	0.262271	0.160551	47.4085	4167703	797103	0.737729	0.202786
2013	177	SC Firm 177	4	JP	0	SERV	5000	CSERV	1	0.229544	0.125793	0.0415502	0.0205082	0.227747	1.82478	15.148	0.551335	0.0144565	1.61337	-0.0238317	0.0112879	-0.0125439	-0.0125439	0.229544	0.125793	54.2441	5018508	722130	0.770456	0.196144
2014	177	SC Firm 177	4	JP	0	SERV	5000	CSERV	1	0.225567	0.0975763	0.0291576	0.0110263	0.188978	2.3117	15.0701	0.521111	0.0228077	-0.1045	0.0132594	0.0680093	0.0812687	0.0812687	0.225567	0.0975763	84.9033	7095641	767230	0.774433	0.209769
2004	178	SC Firm 178	4	JP	1	MAN	9000	TECH	1	0.145889	0.0654387	0	0	0.124174	2.2294	12.9473	0.281998	0.00248768	2.36073	-0.00810815	-0.0148024	-0.0229105	-0.0229105	0.145889	0.0654387	22.0319	1965527	137628	0.854111	0.145889
2005	178	SC Firm 178	4	JP	1	MAN	9000	TECH	1	0.13959	0.0616138	0	0	0.115174	2.26556	12.8709	0.246586	0.00727039	1.30273	-0.00256084	0.0025571	-3.73827e-06	-3.73827e-06	0.13959	0.0616138	20.6957	2058327	135148	0.86041	0.142534
2006	178	SC Firm 178	4	JP	1	MAN	9000	TECH	1	0.128557	0.0669774	0	0	0.108928	1.9194	12.8698	0.227413	0.00371344	1.6929	-0.00181264	-0.000529457	-0.00234209	-0.00234209	0.128557	0.0669774	18.3563	1856497	133269	0.871443	0.128557
2007	178	SC Firm 178	4	JP	1	MAN	9000	TECH	1	0.119535	0.0857999	0	0	0.111678	1.39319	13.07	0.228848	0.00223562	2.19219	0.0132846	0.0153521	0.0286367	0.0286367	0.119535	0.0857999	16.1608	1597530	149932	0.880465	0.119535
2008	178	SC Firm 178	4	JP	1	MAN	9000	TECH	1	0.128049	0.112937	0	0	0.113425	1.13381	13.0811	0.219141	0.00141908	-1.04164	0.0136878	-0.0234721	-0.00978427	-0.00978427	0.128049	0.112937	16.4504	1318590	167877	0.871951	0.128049
2009	178	SC Firm 178	4	JP	1	MAN	9000	TECH	1	0.120349	0.090862	0	0	0.112457	1.32453	13.1135	0.203394	0.000330762	-5.52698	0.00817996	0.0239808	0.0321607	0.0321607	0.120349	0.090862	20.5053	1802225	180120	0.879651	0.120349
2010	178	SC Firm 178	4	JP	1	MAN	9000	TECH	1	0.125259	0.104531	0	0	0.122002	1.1983	13.2638	0.223519	0.00681171	4.65203	0.0182852	-0.00659025	0.0116949	0.0116949	0.125259	0.104531	19.1448	1806760	210908	0.874741	0.125259
2011	178	SC Firm 178	4	JP	1	MAN	9000	TECH	1	0.119242	0.0843279	0	0	0.138529	1.41402	13.2788	0.234756	0.0114394	-0.452725	-0.0132994	0.000270415	-0.013029	-0.013029	0.119242	0.0843279	20.0558	2060341	189745	0.880758	0.119249
2012	178	SC Firm 178	4	JP	1	MAN	9000	TECH	1	0.134634	0.085211	0	0	0.141064	1.58	13.1892	0.219919	0.00208943	1.75369	0.00694392	-0.0670455	-0.0601016	-0.0601016	0.134634	0.085211	29.5292	2147800	200064	0.865366	0.134641
2013	178	SC Firm 178	4	JP	1	MAN	9000	TECH	1	0.12094	0.0589212	0	0	0.14551	2.05257	13.187	0.201447	0.00329764	1.61337	-0.014217	-0.00926927	-0.0234863	-0.0234863	0.12094	0.0589212	32.9399	2859264	179019	0.87906	0.120947
2014	178	SC Firm 178	4	JP	1	MAN	9000	TECH	1	0.132285	0.0470151	0	0	0.141983	2.81367	13.0585	0.176839	0.00242705	-0.1045	0.00837379	-0.0059926	0.00238118	0.00238118	0.132285	0.0470151	53.4484	3873899	191117	0.867715	0.132291
2004	179	SC Firm 179	4	JP	0	SERV	4000	HCARE	1	0.104968	0.0635986	0.00022632	0.000131079	0.146307	1.65047	14.1207	0.134804	0.0033366	2.36073	-0.0251122	0.00242184	-0.0226904	-0.0226904	0.104968	0.0635986	9.00611	6339446	430563	0.895032	0.108701
2005	179	SC Firm 179	4	JP	0	SERV	4000	HCARE	1	0.0846403	0.0602864	4.54156e-05	3.20272e-05	0.120851	1.38319	14.0494	0.110564	0.0168443	1.30273	-0.0170408	0.0759446	0.0589038	0.0589038	0.0846403	0.0602864	10.5033	5572603	357505	0.91536	0.120506
2006	179	SC Firm 179	4	JP	0	SERV	4000	HCARE	1	0.0846403	0.0513552	4.08596e-05	2.58292e-05	0.111652	1.53603	14.0005	0.105416	0.00579453	1.6929	-0.00452825	-0.0182831	-0.0228114	-0.0228114	0.0846403	0.0513552	9.16926	6245398	338096	0.91536	0.120412
2007	179	SC Firm 179	4	JP	0	SERV	4000	HCARE	1	0.0880662	0.0761421	4.13494e-05	3.52895e-05	0.116627	1.1566	14.1951	0.10739	0.00343826	2.19219	0.0173706	-0.0787964	-0.0614258	-0.0614258	0.0880662	0.0761421	10.3013	5110200	421170	0.911934	0.105354
2008	179	SC Firm 179	4	JP	0	SERV	4000	HCARE	1	0.0846403	0.0579443	4.10681e-05	3.10531e-05	0.110323	1.29826	14.1387	0.119968	0.0044883	-1.04164	-0.0235892	-0.111251	-0.13484	-0.13484	0.0846403	0.0579443	8.67402	5212774	320629	0.91536	0.0822177
2009	179	SC Firm 179	4	JP	0	SERV	4000	HCARE	1	0.0846403	0.0562088	3.69948e-05	3.2165e-05	0.098922	1.14054	14.1905	0.115433	0.00793572	-5.52698	-0.00506213	0.0133088	0.00824666	0.00824666	0.0846403	0.0562088	9.33284	4989633	297165	0.91536	0.0775952
2010	179	SC Firm 179	4	JP	0	SERV	4000	HCARE	1	0.0846403	0.0656576	3.30235e-05	2.96688e-05	0.0901243	1.10487	14.302	0.11454	0.00638765	4.65203	0.0143267	-0.045405	-0.0310783	-0.0310783	0.0846403	0.0656576	11.1256	5269486	370295	0.91536	0.0794207
2011	179	SC Firm 179	4	JP	0	SERV	4000	HCARE	1	0.0846403	0.0637915	2.99629e-05	2.27564e-05	0.0937392	1.29062	14.3813	0.109939	0.00277014	-0.452725	0.0120833	0.0375897	0.049673	0.049673	0.0846403	0.0637915	10.243	6369262	433990	0.91536	0.0882398
2012	179	SC Firm 179	4	JP	0	SERV	4000	HCARE	1	0.0846403	0.054327	0.00217171	0.00153097	0.0730422	1.38781	14.2317	0.117417	0.0168585	1.75369	-0.01065	0.0275588	0.0169088	0.0169088	0.0846403	0.054327	17.5178	6619450	380274	0.91536	0.0775952
2013	179	SC Firm 179	4	JP	0	SERV	4000	HCARE	1	0.0846403	0.0380302	0.00217224	0.0010194	0.0648742	2.04521	14.1435	0.121666	0.00611446	1.61337	-0.00293838	0.018488	0.0155496	0.0155496	0.0846403	0.0380302	17.9642	9268829	366431	0.91536	0.0778334
2014	179	SC Firm 179	4	JP	0	SERV	4000	HCARE	1	0.100759	0.0348317	0.00127875	0.000412217	0.0398294	2.89274	13.938	0.134875	0.0185005	-0.1045	0.0168538	0.0602295	0.0770833	0.0770833	0.100759	0.0348317	36.003	12193158	440035	0.899241	0.101811
2004	180	SC Firm 180	4	JP	1	MAN	9000	TECH	1	0.276303	0.0493743	0	0	0.272426	5.59609	13.5501	0.0102296	0.0145625	2.36073	-0.0228765	0.0038799	-0.0189966	-0.0189966	0.276303	0.0493743	49.6947	5248300	272590	0.723697	0.276303
2005	180	SC Firm 180	4	JP	1	MAN	9000	TECH	1	0.290316	0.0501308	0	0	0.293454	5.79118	13.6089	0.0795961	0.0151952	1.30273	0.0136222	0.0322284	0.0458505	0.0458505	0.290316	0.0501308	46.2986	5419265	286010	0.709684	0.290316
2006	180	SC Firm 180	4	JP	1	MAN	9000	TECH	1	0.302746	0.0489297	0	0	0.318255	6.18736	13.6267	0.142818	0.0177786	1.6929	0.00479937	-0.0372357	-0.0324364	-0.0324364	0.302746	0.0489297	43.8028	5648860	290617	0.697254	0.302746
2007	180	SC Firm 180	4	JP	1	MAN	9000	TECH	1	0.301466	0.0590576	0	0	0.329701	5.10461	13.894	0.150804	0.00747248	2.19219	0.0438938	0.064606	0.1085	0.1085	0.301466	0.0590576	42.8666	5419361	340142	0.698534	0.301466
2008	180	SC Firm 180	4	JP	1	MAN	9000	TECH	1	0.291646	0.070278	0	0	0.338759	4.14989	14.0103	0.373488	0.00151697	-1.04164	0.0185678	0.0473115	0.0658793	0.0658793	0.291646	0.070278	41.7478	4805775	363270	0.708354	0.291646
2009	180	SC Firm 180	4	JP	1	MAN	9000	TECH	1	0.320569	0.0689843	0	0	0.320052	4.64698	14.01	0.345294	0.0134078	-5.52698	0.0574	0.0209324	0.0783324	0.0783324	0.320569	0.0689843	48.933	5972047	442503	0.679431	0.320569
2009	181	SC Firm 181	4	JP	0	SERV	5000	CSERV	1	0.325717	0.517994	0.181111	0.329774	0.0688544	0.751684	14.549	0.308588	0.00521555	-5.52698	-0.027126	0.0177991	-0.00932689	-0.00932689	0.325717	0.517994	18.1138	1082190	1.16299e+06	0.674283	0.176588
2010	181	SC Firm 181	4	JP	0	SERV	5000	CSERV	1	0.329582	0.564301	0.159779	0.333775	0.065164	0.751684	14.6588	0.291335	0.00321541	4.65203	0.0418012	0.0314223	0.0732235	0.0732235	0.329582	0.564301	18.066	1028380	1.33192e+06	0.670418	0.202093
2011	181	SC Firm 181	4	JP	0	SERV	5000	CSERV	1	0.312951	0.467171	0.138005	0.235574	0.0775995	0.751684	14.6977	0.268842	0.0101955	-0.452725	-0.0139838	0.00238291	-0.0116009	-0.0116009	0.312951	0.467171	19.1838	1454137	1.27495e+06	0.687049	0.202954
2004	182	SC Firm 182	4	JP	0	SERV	5000	CSERV	1	0.252898	0.0926256	0	0	0.229287	2.73032	14.0214	0.18556	0.0218905	2.36073	0.00514131	0.0335355	0.0386768	0.0386768	0.252898	0.0926256	87.2626	1437007	146691	0.747102	0.252898
2005	182	SC Firm 182	4	JP	0	SERV	5000	CSERV	1	0.223531	0.0607005	0	0	0.25638	3.68252	14.0121	0.157013	0.0213114	1.30273	-0.0209889	-0.00679996	-0.0277889	-0.0277889	0.223531	0.0607005	76.5482	2075096	134099	0.776469	0.223531
2006	182	SC Firm 182	4	JP	0	SERV	5000	CSERV	1	0.224224	0.0750481	0.002626	0.000738569	0.244776	2.98773	14.0978	0.152062	0.00637841	1.6929	0.0227253	0.00100311	0.0237284	0.0237284	0.224224	0.0750481	59.9733	1839144	149223	0.775776	0.222181
2007	182	SC Firm 182	4	JP	0	SERV	5000	CSERV	1	0.23917	0.124262	0.00352754	0.00159536	0.244512	1.92472	14.2653	0.132491	0.00131869	2.19219	0.0652598	0.0057607	0.0710205	0.0710205	0.23917	0.124262	46.965	1446279	205219	0.76083	0.236477
2008	182	SC Firm 182	4	JP	0	SERV	5000	CSERV	1	0.237042	0.172633	0	0	0.223628	1.3731	14.3338	0.140056	0.015054	-1.04164	0.0194912	-0.00793203	0.0115592	0.0115592	0.237042	0.172633	36.5563	1071661	223605	0.762958	0.237042
2009	182	SC Firm 182	4	JP	0	SERV	5000	CSERV	1	0.238427	0.189645	0.00379112	0.00283664	0.175905	1.25723	14.4305	0.131264	0.0345543	-5.52698	0.0384984	0.0223265	0.0608249	0.0608249	0.238427	0.189645	41.2681	1139455	266663	0.761573	0.235529
2010	182	SC Firm 182	4	JP	0	SERV	5000	CSERV	1	0.208435	0.164034	0.00325544	0.00242789	0.177812	1.27069	14.546	0.123561	0.00298647	4.65203	-0.0152385	-0.0225135	-0.037752	-0.037752	0.208435	0.164034	48.8043	1266412	248496	0.791565	0.20585
2011	182	SC Firm 182	4	JP	0	SERV	5000	CSERV	1	0.196889	0.15506	0.000851405	0.000637466	0.184493	1.26976	14.6012	0.114806	0.00589474	-0.452725	-0.000428332	-0.00822362	-0.00865195	-0.00865195	0.196889	0.15506	56.0981	1351143	247956	0.803111	0.196205
2012	182	SC Firm 182	4	JP	0	SERV	5000	CSERV	1	0.214176	0.133406	0.00432046	0.0024449	0.186017	1.60545	14.5263	0.119269	0.00196993	1.75369	0.0219556	0.0187458	0.0407014	0.0407014	0.214176	0.133406	108.131	1794684	276278	0.785824	0.210766
2013	182	SC Firm 182	4	JP	0	SERV	5000	CSERV	1	0.22884	0.11665	0.0122398	0.00548401	0.184791	1.96177	14.5889	0.158156	0.00324488	1.61337	0.0282745	-0.00468089	0.0235936	0.0235936	0.22884	0.11665	124.561	2387100	315226	0.77116	0.219284
2014	182	SC Firm 182	4	JP	0	SERV	5000	CSERV	1	0.313752	0.12297	0.11516	0.0383815	0.16318	2.55145	14.5938	0.188567	0.0152743	-0.1045	0.112237	0.0290312	0.141268	0.141268	0.313752	0.12297	204.498	3500379	490796	0.686248	0.238688
2004	183	SC Firm 183	4	JP	0	SERV	4000	HCARE	1	0.226542	0.133384	0.0597676	0.032324	0.169553	1.69842	13.6712	0.233443	0.027396	2.36073	-0.116191	0.00260716	-0.113584	-0.113584	0.226542	0.133384	5.41045	1923845	296106	0.773458	0.17754
2005	183	SC Firm 183	4	JP	0	SERV	4000	HCARE	1	0.211338	0.114106	0.0451762	0.0222362	0.171611	1.85212	13.6367	0.202026	0.00284888	1.30273	-0.0202314	0.00623955	-0.0139919	-0.0139919	0.211338	0.114106	5.62978	2098057	270236	0.788662	0.174156
2006	183	SC Firm 183	4	JP	0	SERV	4000	HCARE	1	0.188712	0.105695	0.0404856	0.0209883	0.158233	1.78545	13.6567	0.191616	0.00798313	1.6929	-0.0113482	0.0181603	0.00681208	0.00681208	0.188712	0.105695	4.87783	2156829	254907	0.811288	0.157159
2007	183	SC Firm 183	4	JP	0	SERV	4000	HCARE	1	0.18785	0.13753	0.0398604	0.0278247	0.159474	1.36588	13.8508	0.190673	0.00273721	2.19219	0.0253206	-0.0346191	-0.00929847	-0.00929847	0.18785	0.13753	6.03677	1847606	294620	0.81215	0.154242
2008	183	SC Firm 183	4	JP	0	SERV	4000	HCARE	1	0.16965	0.0909397	0.00553595	0.00271825	0.130479	1.86552	13.8432	0.189822	0.0193245	-1.04164	-0.0231927	-0.0331324	-0.0563251	-0.0563251	0.16965	0.0909397	6.37032	2590907	259187	0.83035	0.16516
2009	183	SC Firm 183	4	JP	0	SERV	4000	HCARE	1	0.175312	0.106225	0.00446338	0.00250032	0.19812	1.65039	13.9838	0.159252	0.0530423	-5.52698	0.030151	0.00325726	0.0334083	0.0334083	0.175312	0.106225	6.93157	2633764	313022	0.824688	0.171704
2010	183	SC Firm 183	4	JP	0	SERV	4000	HCARE	1	0.153533	0.0886088	0.000970787	0.000520594	0.182452	1.73271	14.1027	0.135048	0.00797026	4.65203	0.0126858	0.0258758	0.0385616	0.0385616	0.153533	0.0886088	8.21419	3509585	341215	0.846467	0.152819
2011	183	SC Firm 183	4	JP	0	SERV	4000	HCARE	1	0.160678	0.0876806	0.000688734	0.000345883	0.149305	1.83254	14.139	0.128385	0.0225399	-0.452725	0.0185806	0.0101724	0.028753	0.028753	0.160678	0.0876806	7.6619	4014588	385832	0.839322	0.17014
2012	183	SC Firm 183	4	JP	0	SERV	4000	HCARE	1	0.161486	0.0786897	0.00051944	0.000230436	0.140107	2.05218	14.0499	0.137347	0.0076676	1.75369	-0.0205494	0.0204418	-0.000107554	-0.000107554	0.161486	0.0786897	9.32953	4007417	342276	0.838514	0.172415
2013	183	SC Firm 183	4	JP	0	SERV	4000	HCARE	1	0.20045	0.110952	0.000804594	0.000400682	0.137683	1.80664	14.1643	0.114354	0.00148525	1.61337	0.0518242	0.0391809	0.0910052	0.0910052	0.20045	0.110952	10.8321	3698963	461624	0.79955	0.211568
2014	183	SC Firm 183	4	JP	0	SERV	4000	HCARE	1	0.294369	0.1085	0.147573	0.0480781	0.139158	2.71307	14.1136	0.0956739	0.00667696	-0.1045	0.112086	0.0133452	0.125432	0.125432	0.294369	0.1085	16.6487	6125278	745480	0.705631	0.181657
2004	184	SC Firm 184	4	JP	1	MAN	9000	TECH	1	0.141633	0.106614	0	0	0.0789415	1.32846	13.3987	0.340763	0.0178657	2.36073	-0.0270825	-0.0151975	-0.0422799	-0.0422799	0.141633	0.106614	21.2856	892030	106453	0.858367	0.14321
2005	184	SC Firm 184	4	JP	1	MAN	9000	TECH	1	0.224248	0.18072	0	0	0.0735659	1.24086	13.8376	0.23326	0.013985	1.30273	0.124093	0.104302	0.228395	0.228395	0.224248	0.18072	22.8972	1080533	238348	0.775752	0.242264
2006	184	SC Firm 184	4	JP	1	MAN	9000	TECH	1	0.216602	0.165185	0	0	0.0944989	1.31127	13.9692	0.247976	0.0223371	1.6929	-0.0249594	-0.0772611	-0.10222	-0.10222	0.216602	0.165185	16.0373	1080107	213720	0.783398	0.217764
2007	184	SC Firm 184	4	JP	1	MAN	9000	TECH	1	0.234089	0.232721	0.0138225	0.0137186	0.110016	1.00588	14.1337	0.25597	0.00888476	2.19219	0.0519127	0.0217367	0.0736493	0.0736493	0.234089	0.232721	16.3934	905423	274622	0.765911	0.223431
2008	184	SC Firm 184	4	JP	1	MAN	9000	TECH	1	0.214366	0.282195	0.0141524	0.0202646	0.104525	0.759637	14.1218	0.264943	0.00799856	-1.04164	-0.023315	-0.016122	-0.0394369	-0.0394369	0.214366	0.282195	13.7681	630019	247683	0.785634	0.203088
2008	185	SC Firm 185	4	JP	0	SERV	5000	CSERV	1	0.162107	0.185522	0	0	0.0825656	0.873785	14.0511	0.508864	0.00632004	-1.04164	0.0281147	-0.0121735	0.0159412	0.0159412	0.162107	0.185522	22.2087	1219921	277875	0.837893	0.162107
2009	185	SC Firm 185	4	JP	0	SERV	5000	CSERV	1	0.185175	0.243875	0.00148347	0.00210408	0.0720105	0.759304	14.209	0.572544	0.00992684	-5.52698	0.0531618	0.0132336	0.0663954	0.0663954	0.185175	0.243875	19.7058	1208485	389775	0.814825	0.183964
2010	185	SC Firm 185	4	JP	0	SERV	5000	CSERV	1	0.196246	0.344898	0.00110444	0.00237844	0.071492	0.751684	14.3437	0.599692	0.00250091	4.65203	0.0351864	0.0108634	0.0460497	0.0460497	0.196246	0.344898	23.3137	902082	474929	0.803754	0.195357
2004	186	SC Firm 186	4	JP	1	MAN	3000	CGOODS	1	0.138444	0.0747979	0.00582153	0.00293736	0.205246	1.85091	14.3173	0.228252	0.0453075	2.36073	0.00884314	-0.0101652	-0.00132206	-0.00132206	0.138444	0.0747979	28.225	3005109	242948	0.861556	0.134283
2005	186	SC Firm 186	4	JP	1	MAN	3000	CGOODS	1	0.133125	0.064109	0.00870322	0.00390093	0.176153	2.07655	14.1687	0.234596	0.0198036	1.30273	-0.0204228	-0.0422062	-0.062629	-0.062629	0.133125	0.064109	26.0346	3074933	210634	0.866875	0.129068
2006	186	SC Firm 186	4	JP	1	MAN	3000	CGOODS	1	0.129269	0.0640547	0.00602848	0.00278813	0.152562	2.0181	14.1739	0.249551	0.0179238	1.6929	-0.00978871	-0.0404079	-0.0501966	-0.0501966	0.129269	0.0640547	29.0732	2861066	195807	0.870731	0.128209
2007	186	SC Firm 186	4	JP	1	MAN	3000	CGOODS	1	0.189242	0.0986005	0.0325286	0.0155121	0.193312	1.91929	14.4585	0.223155	0.0301314	2.19219	0.0829961	0.0114878	0.0944838	0.0944838	0.189242	0.0986005	35.8063	3188388	348765	0.810758	0.161993
2008	186	SC Firm 186	4	JP	1	MAN	3000	CGOODS	1	0.142154	0.0878514	0.0254163	0.0149311	0.245397	1.61812	14.7692	0.224282	0.030398	-1.04164	-0.0213684	-0.060048	-0.0814164	-0.0814164	0.142154	0.0878514	38.879	3147977	303190	0.857846	0.123275
2009	186	SC Firm 186	4	JP	1	MAN	3000	CGOODS	1	0.125383	0.061555	0.0108634	0.005	0.159671	2.03692	14.5134	0.232691	0.0623321	-5.52698	-0.0222212	0.00348418	-0.018737	-0.018737	0.125383	0.061555	40.5581	3926447	257546	0.874617	0.120561
2010	186	SC Firm 186	4	JP	1	MAN	3000	CGOODS	1	0.153004	0.083063	0.00828898	0.00417394	0.207252	1.84202	14.7833	0.213391	0.0368427	4.65203	0.0511743	0.00895102	0.0601253	0.0601253	0.153004	0.083063	51.0792	4271838	386975	0.846996	0.150076
2011	186	SC Firm 186	4	JP	1	MAN	3000	CGOODS	1	0.157493	0.0939933	0.0375873	0.021215	0.192916	1.67558	14.8741	0.216663	0.00899007	-0.452725	0.0196452	-0.0200986	-0.000453407	-0.000453407	0.157493	0.0939933	47.8945	4261654	442124	0.842507	0.128219
2012	186	SC Firm 186	4	JP	1	MAN	3000	CGOODS	1	0.160325	0.0666637	0.0329457	0.0125837	0.198609	2.40499	14.8573	0.236998	0.00847039	1.75369	0.0115138	0.0557064	0.0672202	0.0672202	0.160325	0.0666637	64.1786	6668957	476332	0.839675	0.134599
2013	186	SC Firm 186	4	JP	1	MAN	3000	CGOODS	1	0.15092	0.0472045	0.0332423	0.0094933	0.169092	3.19714	14.761	0.234313	0.0198552	1.61337	-0.0062048	0.0582869	0.0520821	0.0520821	0.15092	0.0472045	85.8773	9234804	457521	0.84908	0.125016
2014	186	SC Firm 186	4	JP	1	MAN	3000	CGOODS	1	0.164737	0.0370818	0.03638	0.00731765	0.199818	4.44252	14.8393	0.237889	0.024701	-0.1045	0.0268003	0.0228861	0.0496864	0.0496864	0.164737	0.0370818	131.006	14189005	546415	0.835263	0.136497
2004	187	SC Firm 187	4	JP	1	MAN	1000	BMAT	1	0.302471	0.199198	0.104701	0.062867	0.164342	1.51844	16.0165	0.303597	0.00859821	2.36073	-0.0122951	0.00285896	-0.00943615	-0.00943615	0.302471	0.199198	53.1716	16762226	4.16958e+06	0.697529	0.243534
2005	187	SC Firm 187	4	JP	1	MAN	1000	BMAT	1	0.273361	0.141652	0.064577	0.0293936	0.177683	1.92981	16.0758	0.280493	0.0057282	1.30273	-0.0201831	0.0346128	0.0144297	0.0144297	0.273361	0.141652	66.9692	23528656	3.88289e+06	0.726639	0.247571
2006	187	SC Firm 187	4	JP	1	MAN	1000	BMAT	1	0.274338	0.145717	0.032363	0.0148658	0.204029	1.88268	16.2204	0.293231	0.0132235	1.6929	0.0284621	-0.000290649	0.0281714	0.0281714	0.274338	0.145717	62.3723	25399042	4.33237e+06	0.725662	0.265562
2007	187	SC Firm 187	4	JP	1	MAN	1000	BMAT	1	0.240367	0.182327	0.0227701	0.0161546	0.223303	1.31833	16.4394	0.341219	0.0142008	2.19219	0.01498	0.00568886	0.0206688	0.0206688	0.240367	0.182327	45.082	20720449	4.62031e+06	0.759633	0.231514
2008	187	SC Firm 187	4	JP	1	MAN	1000	BMAT	1	0.165612	0.111407	0.0166641	0.0105912	0.209138	1.48655	16.3128	0.361839	0.00808132	-1.04164	-0.105419	-0.0966559	-0.202075	-0.202075	0.165612	0.111407	56.565	22518157	2.82321e+06	0.834388	0.17366
2009	187	SC Firm 187	4	JP	1	MAN	1000	BMAT	1	0.167443	0.110816	0.0134291	0.00836429	0.115842	1.511	16.0989	0.365225	0.0509002	-5.52698	0.0182982	0.0177085	0.0360067	0.0360067	0.167443	0.110816	53.9612	25432541	3.16958e+06	0.832557	0.177651
2010	187	SC Firm 187	4	JP	1	MAN	1000	BMAT	1	0.176011	0.150392	0.00981478	0.00814704	0.136173	1.17035	16.3592	0.347689	0.0122901	4.65203	0.0282937	-0.0246263	0.0036674	0.0036674	0.176011	0.150392	49.2592	21335563	3.77668e+06	0.823989	0.189981
2011	187	SC Firm 187	4	JP	1	MAN	1000	BMAT	1	0.170567	0.123559	0.0100999	0.00694596	0.128465	1.38046	16.3536	0.330724	0.000679064	-0.452725	-0.00219433	-0.0154236	-0.0176179	-0.0176179	0.170567	0.123559	60.8069	26448922	3.72871e+06	0.829433	0.186579
2012	187	SC Firm 187	4	JP	1	MAN	1000	BMAT	1	0.144528	0.0914124	0.0079783	0.00476655	0.123902	1.58106	16.203	0.3382	0.00065238	1.75369	-0.0383061	0.052384	0.0140779	0.0140779	0.144528	0.0914124	58.3928	29296494	2.9475e+06	0.855472	0.171504
2013	187	SC Firm 187	4	JP	1	MAN	1000	BMAT	1	0.156631	0.119662	0.00806653	0.00591666	0.12063	1.30894	16.2401	0.327798	0.00191739	1.61337	0.0183111	0.0570636	0.0753747	0.0753747	0.156631	0.119662	65.8463	24554919	3.3377e+06	0.843369	0.186579
2014	187	SC Firm 187	4	JP	1	MAN	1000	BMAT	1	0.162405	0.104813	0.00692672	0.00419429	0.115095	1.54947	16.1623	0.319866	0.00245354	-0.1045	-0.00108397	0.0255852	0.0245012	0.0245012	0.162405	0.104813	54.9174	28317553	3.31557e+06	0.837595	0.194719
2004	188	SC Firm 188	4	JP	0	SERV	4000	HCARE	1	0.215479	0.141086	0.0603409	0.0369835	0.096072	1.52729	14.437	0.171766	0.0130258	2.36073	0.0197939	-0.0171718	0.00262209	0.00262209	0.215479	0.141086	14.0858	4863022	798805	0.784521	0.194328
2005	188	SC Firm 188	4	JP	0	SERV	4000	HCARE	1	0.157163	0.0922147	0	0	0.0885666	1.70431	14.3278	0.150232	0.00284955	1.30273	-0.0625994	0.0580208	-0.00457854	-0.00457854	0.157163	0.0922147	19.6622	5623676	571265	0.842837	0.211587
2006	188	SC Firm 188	4	JP	0	SERV	4000	HCARE	1	0.138272	0.0784913	0	0	0.0876724	1.76163	14.3438	0.157867	0.000808154	1.6929	-0.0183594	-0.00650161	-0.024861	-0.024861	0.138272	0.0784913	17.5478	5920667	504305	0.861728	0.195768
2007	188	SC Firm 188	4	JP	0	SERV	4000	HCARE	1	0.128621	0.0908663	0	0	0.123433	1.41549	14.5795	0.170112	0.0215385	2.19219	0.00695039	-0.0355129	-0.0285625	-0.0285625	0.128621	0.0908663	25.4209	5333889	533113	0.871379	0.173487
2004	189	SC Firm 189	4	JP	1	MAN	2000	IND	1	0.251444	0.130842	0.0368025	0.0168353	0.150593	1.92174	14.7771	0.149663	0.0103165	2.36073	0.017616	0.00761893	0.0252349	0.0252349	0.251444	0.130842	142.893	8414936	1.26678e+06	0.748556	0.222843
2005	189	SC Firm 189	4	JP	1	MAN	2000	IND	1	0.234155	0.0977681	0.0329683	0.0119387	0.141044	2.395	14.7772	0.149923	0.00713297	1.30273	-0.00884086	0.0150458	0.00620491	0.00620491	0.234155	0.0977681	141.837	11264840	1.22069e+06	0.765845	0.208045
2006	189	SC Firm 189	4	JP	1	MAN	2000	IND	1	0.223188	0.122712	0.0286315	0.0141469	0.146449	1.8188	14.8747	0.144991	0.00439372	1.6929	0.0141628	0.0123444	0.0265072	0.0265072	0.223188	0.122712	118.347	9318219	1.3034e+06	0.776812	0.200291
2007	189	SC Firm 189	4	JP	1	MAN	2000	IND	1	0.240384	0.195565	0.0663596	0.0517754	0.148933	1.22918	15.0925	0.146999	0.000383716	2.19219	0.0492102	-0.0587547	-0.00954446	-0.00954446	0.240384	0.195565	100.798	6741447	1.6389e+06	0.759616	0.186394
2008	189	SC Firm 189	4	JP	1	MAN	2000	IND	1	0.197565	0.144196	0.0755998	0.0530017	0.104107	1.37011	14.869	0.155252	0.0332117	-1.04164	-0.0690124	-0.0764307	-0.145443	-0.145443	0.197565	0.144196	113.887	7208758	1.21462e+06	0.802435	0.13194
2009	189	SC Firm 189	4	JP	1	MAN	2000	IND	1	0.20138	0.125182	0.0691455	0.0404482	0.0582831	1.6087	14.6757	0.149142	0.0295089	-5.52698	0.0233428	0.01764	0.0409829	0.0409829	0.20138	0.125182	170.591	9601138	1.37387e+06	0.79862	0.142057
2010	189	SC Firm 189	4	JP	1	MAN	2000	IND	1	0.251882	0.159755	0.0581465	0.0336883	0.129542	1.57668	15.179	0.133752	0.052579	4.65203	0.0923701	-0.0104273	0.0819429	0.0819429	0.251882	0.159755	161.424	11410419	2.16945e+06	0.748118	0.205696
2011	189	SC Firm 189	4	JP	1	MAN	2000	IND	1	0.206787	0.135473	0.0534836	0.0328494	0.135924	1.5264	15.2336	0.129601	0.00345448	-0.452725	-0.0365997	-0.00171236	-0.038312	-0.038312	0.206787	0.135473	180.909	11762540	1.84322e+06	0.793213	0.161966
2012	189	SC Firm 189	4	JP	1	MAN	2000	IND	1	0.185397	0.107831	0.045451	0.0246627	0.105424	1.71933	15.0483	0.130859	0.0190177	1.75369	-0.0203027	0.0487089	0.0284062	0.0284062	0.185397	0.107831	252.021	13745097	1.66129e+06	0.814603	0.14661
2013	189	SC Firm 189	4	JP	1	MAN	2000	IND	1	0.189667	0.0899317	0.0785147	0.0347237	0.121806	2.10901	15.1586	0.130148	0.0115312	1.61337	0.012365	0.0527217	0.0650867	0.0650867	0.189667	0.0899317	267.621	17983956	1.77715e+06	0.810333	0.120623
2014	189	SC Firm 189	4	JP	1	MAN	2000	IND	1	0.175051	0.0746391	0.0756561	0.0301732	0.12516	2.3453	15.1541	0.13008	0.00306949	-0.1045	-0.0140284	0.0489763	0.0349479	0.0349479	0.175051	0.0746391	263.673	20398050	1.6453e+06	0.824949	0.118268
2005	190	SC Firm 190	4	JP	0	SERV	4000	HCARE	1	0.267703	0.167617	0.018001	0.00999654	0.0945639	1.59711	14.5522	0.1739	0.0175124	1.30273	0.0846715	0.0424227	0.127094	0.127094	0.267703	0.167617	11.6293	4439976	894076	0.732297	0.254279
2006	190	SC Firm 190	4	JP	0	SERV	4000	HCARE	1	0.196972	0.134822	0.0147539	0.0094239	0.148166	1.46098	14.612	0.170551	0.0317205	1.6929	-0.0783107	0.00618413	-0.0721266	-0.0721266	0.196972	0.134822	7.26788	4105288	639735	0.803028	0.190419
2007	190	SC Firm 190	4	JP	0	SERV	4000	HCARE	1	0.204089	0.194485	0.0142507	0.0134294	0.124093	1.04938	14.7882	0.175793	0.0158204	2.19219	0.0443718	0.00123253	0.0456043	0.0456043	0.204089	0.194485	9.21577	3385762	817463	0.795911	0.192582
2008	190	SC Firm 190	4	JP	0	SERV	4000	HCARE	1	0.170925	0.157683	0	0	0.108933	1.08398	14.7981	0.176604	0.0104256	-1.04164	-0.0355673	-0.0156713	-0.0512386	-0.0512386	0.170925	0.157683	10.5559	3614612	676659	0.829075	0.170925
2004	191	SC Firm 191	4	JP	0	SERV	4000	HCARE	1	0.267067	0.116202	0.00166643	0.000601941	0.159779	2.29831	13.4848	0.231317	0.0176402	2.36073	-0.000820515	-0.00221343	-0.00303395	-0.00303395	0.267067	0.116202	9.54037	1472853	193650	0.732933	0.275708
2005	191	SC Firm 191	4	JP	0	SERV	4000	HCARE	1	0.271361	0.0843342	0.00233327	0.000578041	0.164095	3.21769	13.5238	0.245251	0.00440328	1.30273	0.0107748	-0.00871737	0.00205745	0.00205745	0.271361	0.0843342	9.78909	2189512	201657	0.728639	0.28186
2006	191	SC Firm 191	4	JP	0	SERV	4000	HCARE	1	0.281448	0.119907	0.00220881	0.000769417	0.1653	2.34721	13.6622	0.234943	0.00216662	1.6929	0.0467891	0.0173135	0.0641025	0.0641025	0.281448	0.119907	10.5509	1775245	241866	0.718552	0.29356
2007	191	SC Firm 191	4	JP	0	SERV	4000	HCARE	1	0.259856	0.141605	0.00688017	0.0032446	0.178613	1.83507	13.9193	0.266763	0.00868376	2.19219	0.0384188	0.0406614	0.0790802	0.0790802	0.259856	0.141605	8.99978	1720540	283829	0.740144	0.270332
2008	191	SC Firm 191	4	JP	0	SERV	4000	HCARE	1	0.32233	0.177891	0.108981	0.0527096	0.189719	1.81195	13.9391	0.308939	0.00925617	-1.04164	0.0856142	-0.0325773	0.053037	0.053037	0.32233	0.177891	13.1138	1786097	386483	0.67767	0.244085
2009	191	SC Firm 191	4	JP	0	SERV	4000	HCARE	1	0.273334	0.102275	0.0227972	0.00701626	0.193395	2.67254	14.0331	0.298382	0.00377314	-5.52698	-0.0259483	0.0104987	-0.0154495	-0.0154495	0.273334	0.102275	17.2615	3098250	352975	0.726666	0.262025
2010	191	SC Firm 191	4	JP	0	SERV	4000	HCARE	1	0.264996	0.101619	0.015105	0.00478862	0.198676	2.60774	14.2207	0.278583	0.00740928	4.65203	0.0393166	0.0142723	0.053589	0.053589	0.264996	0.101619	16.2984	3664180	414468	0.735004	0.264904
2011	191	SC Firm 191	4	JP	0	SERV	4000	HCARE	1	0.268089	0.09335	0.00494945	0.00139624	0.191355	2.87187	14.3026	0.279994	0.00399836	-0.452725	0.0269263	-0.000899589	0.0260267	0.0260267	0.268089	0.09335	23.0496	4474917	460744	0.731911	0.276811
2012	191	SC Firm 191	4	JP	0	SERV	4000	HCARE	1	0.293526	0.0756229	0.00246472	0.000486275	0.176961	3.88145	14.2509	0.262863	0.0063282	1.75369	0.0426884	0.0291769	0.0718653	0.0718653	0.293526	0.0756229	29.5292	6590361	539155	0.706474	0.309549
2013	191	SC Firm 191	4	JP	0	SERV	4000	HCARE	1	0.277237	0.0783143	0.00951291	0.00212297	0.210028	3.54006	14.3968	0.255146	0.0211621	1.61337	0.0132598	0.053443	0.0667027	0.0667027	0.277237	0.0783143	45.1197	6664077	566237	0.722763	0.299135
2014	191	SC Firm 191	4	JP	0	SERV	4000	HCARE	1	0.280019	0.0469211	0.00398866	0.000506659	0.231322	5.96787	14.4269	0.238166	0.016354	-0.1045	0.00574074	-0.00367223	0.00206851	0.00206851	0.280019	0.0469211	64.9846	11742345	578089	0.719981	0.313401
2004	192	SC Firm 192	4	JP	0	SERV	4000	HCARE	1	0.13652	0.041474	0.0430018	0.0121477	0.00587874	3.2917	11.7581	0.34428	0.014627	2.36073	-0.0148765	0.181634	0.166757	0.166757	0.13652	0.041474	8.96794	1102591	47707.5	0.86348	0.107634
2005	192	SC Firm 192	4	JP	0	SERV	4000	HCARE	1	0.128297	0.0589912	0.016104	0.00692332	-0.000135026	2.17485	11.8531	0.310356	0.00311671	1.30273	0.00197433	0.0770412	0.0790156	0.0790156	0.128297	0.0589912	10.0202	772910	48453.2	0.871703	0.146233
2006	192	SC Firm 192	4	JP	0	SERV	4000	HCARE	1	0.136228	0.0511805	0.0147792	0.00510445	0.0306804	2.66171	12.0904	0.272675	0.0203222	1.6929	0.010897	-0.030419	-0.019522	-0.019522	0.136228	0.0511805	5.48645	976358	52666	0.863772	0.142641
2007	192	SC Firm 192	4	JP	0	SERV	4000	HCARE	1	0.127228	0.0802515	0.0136029	0.00818677	0.0433073	1.58536	12.2218	0.272852	0.0115844	2.19219	0.0111395	0.117171	0.128311	0.128311	0.127228	0.0802515	4.90973	661515	57719.7	0.872772	0.126764
2008	192	SC Firm 192	4	JP	0	SERV	4000	HCARE	1	0.130066	0.0922398	0.0131572	0.00897985	0.0431464	1.41008	12.1619	0.272611	0.00232069	-1.04164	-0.00227358	-0.0459928	-0.0482664	-0.0482664	0.130066	0.0922398	5.14006	558278	56728	0.869934	0.126725
2009	192	SC Firm 192	4	JP	0	SERV	4000	HCARE	1	0.12909	0.0841534	0.0118289	0.00736601	0.0442214	1.53398	12.2394	0.26251	0.00303734	-5.52698	0.00761151	0.0418983	0.0495098	0.0495098	0.12909	0.0841534	6.20248	656058	60282.5	0.87091	0.123522
2010	192	SC Firm 192	4	JP	0	SERV	4000	HCARE	1	0.115862	0.0728948	0.0107462	0.00647546	0.0554186	1.58945	12.3254	0.255677	0.00927392	4.65203	-0.00184308	0.0681688	0.0663257	0.0663257	0.115862	0.0728948	5.06888	754691	59338.5	0.884138	0.107291
2008	193	SC Firm 193	4	JP	0	SERV	4000	HCARE	1	0.219928	0.170648	0.00909564	0.00665455	0.153812	1.28878	16.5605	0.0936509	0.0264955	-1.04164	0.0374737	0.11667	0.154144	0.154144	0.219928	0.170648	41.4233	29848567	6.14166e+06	0.780072	0.264103
2009	193	SC Firm 193	4	JP	0	SERV	4000	HCARE	1	0.198423	0.143311	0.00878966	0.00595689	0.18951	1.38457	16.5682	0.112971	0.0267336	-5.52698	-0.00488683	-0.0129141	-0.0178009	-0.0178009	0.198423	0.143311	48.9944	35831441	5.99404e+06	0.801577	0.241516
2010	193	SC Firm 193	4	JP	0	SERV	4000	HCARE	1	0.208937	0.158333	0.00798037	0.00569703	0.170042	1.3196	16.6528	0.146239	0.0120897	4.65203	0.0300666	-0.0552466	-0.0251801	-0.0251801	0.208937	0.158333	43.9303	37219078	7.00159e+06	0.791063	0.242874
2004	194	SC Firm 194	4	JP	0	SERV	4000	HCARE	1	0.294778	0.122063	0.0591834	0.0204952	0.200637	2.41497	14.5799	0.342588	0.0134836	2.36073	-0.0286268	-0.0015633	-0.0301901	-0.0301901	0.294778	0.122063	14.7982	6185854	860043	0.705222	0.251936
2005	194	SC Firm 194	4	JP	0	SERV	4000	HCARE	1	0.229088	0.0932021	0.0143309	0.0050036	0.178863	2.45797	14.5573	0.309708	0.00547258	1.30273	-0.0562503	0.0529097	-0.00334054	-0.00334054	0.229088	0.0932021	19.6622	6718109	690498	0.770912	0.218133
2006	194	SC Firm 194	4	JP	0	SERV	4000	HCARE	1	0.20785	0.0796657	0.00230531	0.000761698	0.201474	2.60903	14.6687	0.314979	0.0163777	1.6929	-0.0136647	-0.039445	-0.0531097	-0.0531097	0.20785	0.0796657	26.1217	7484865	647903	0.79215	0.210517
2007	194	SC Firm 194	4	JP	0	SERV	4000	HCARE	1	0.297138	0.114824	0.108087	0.0358518	0.206262	2.58777	14.9371	0.274369	0.00261182	2.19219	0.139763	-0.0679786	0.071784	0.071784	0.297138	0.114824	23.0948	9430342	1.22329e+06	0.702862	0.212049
2008	194	SC Firm 194	4	JP	0	SERV	4000	HCARE	1	0.266165	0.1175	0.084758	0.0328775	0.196333	2.26523	14.9349	0.292997	0.0143889	-1.04164	-0.052814	-0.104704	-0.157518	-0.157518	0.266165	0.1175	30.2834	7666484	1.02075e+06	0.733835	0.198478
2009	194	SC Firm 194	4	JP	0	SERV	4000	HCARE	1	0.255081	0.100175	0.0612537	0.020773	0.195516	2.54636	15.0337	0.267986	0.00435658	-5.52698	0.0308758	0.0092645	0.0401403	0.0401403	0.255081	0.100175	28.0231	10431609	1.16132e+06	0.744919	0.206569
2010	194	SC Firm 194	4	JP	0	SERV	4000	HCARE	1	0.20106	0.0912213	0.00276369	0.00110417	0.197603	2.2041	15.1885	0.269163	0.000232033	4.65203	-0.028838	-0.01814	-0.0469781	-0.0469781	0.20106	0.0912213	23.5573	10118230	1.01565e+06	0.79894	0.199746
2010	195	SC Firm 195	4	JP	0	SERV	4000	HCARE	1	0.203539	0.159003	0	0	0.138461	1.28009	16.2555	0.142431	0.0335014	4.65203	-0.00343462	0.0359501	0.0325154	0.0325154	0.203539	0.159003	8.13621	17285516	3.26808e+06	0.796461	0.235183
2011	195	SC Firm 195	4	JP	0	SERV	4000	HCARE	1	0.251012	0.171832	0	0	0.140665	1.46079	16.2759	0.142193	0.00327327	-0.452725	0.0578379	-0.0241711	0.0336668	0.0336668	0.251012	0.171832	9.01058	20466901	4.24658e+06	0.748988	0.273096
2012	195	SC Firm 195	4	JP	0	SERV	4000	HCARE	1	0.239827	0.136632	0	0	0.139063	1.75529	16.1597	0.134872	0.00882087	1.75369	-0.0157097	0.0886976	0.0729879	0.0729879	0.239827	0.136632	11.8497	25184227	3.98551e+06	0.760173	0.249583
2013	195	SC Firm 195	4	JP	0	SERV	4000	HCARE	1	0.232671	0.122468	0	0	0.148547	1.89985	16.2176	0.115813	0.00231511	1.61337	-0.0161118	0.0358133	0.0197015	0.0197015	0.232671	0.122468	14.1177	26708240	3.7274e+06	0.767329	0.232672
2014	195	SC Firm 195	4	JP	0	SERV	4000	HCARE	1	0.265182	0.0977497	0	0	0.152076	2.71287	16.1557	0.113109	0.00418792	-0.1045	0.0155495	-0.0317812	-0.0162317	-0.0162317	0.265182	0.0977497	14.3705	36547718	3.95957e+06	0.734818	0.265203
2007	196	SC Firm 196	4	JP	1	MAN	9000	TECH	1	0.324636	0.202746	0	0	0.241562	1.6012	16.0214	0.131312	0.0145175	2.19219	-0.00644997	0.0152534	0.0088034	0.0088034	0.324636	0.202746	34.3376	10140066	2.57867e+06	0.675364	0.324636
2008	196	SC Firm 196	4	JP	1	MAN	9000	TECH	1	0.223409	0.172673	0	0	0.056479	1.29383	15.4527	0.149338	0.129833	-1.04164	-0.157575	-0.0123534	-0.169929	-0.169929	0.223409	0.172673	64.0277	7245083	1.51213e+06	0.776591	0.223409
2009	196	SC Firm 196	4	JP	1	MAN	9000	TECH	1	0.26273	0.137861	0	0	0.025595	1.90576	15.315	0.132299	0.0177661	-5.52698	0.0597796	0.0152108	0.0749903	0.0749903	0.26273	0.137861	63.0365	12241790	1.95753e+06	0.73727	0.26273
2010	196	SC Firm 196	4	JP	1	MAN	9000	TECH	1	0.290361	0.22072	0	0	0.142835	1.31551	15.9002	0.139087	0.0877382	4.65203	0.089213	0.0127673	0.10198	0.10198	0.290361	0.22072	50.8838	9976599	2.82574e+06	0.709639	0.290361
2011	196	SC Firm 196	4	JP	1	MAN	9000	TECH	1	0.249694	0.176122	0.00799245	0.00514878	0.108013	1.41773	15.8498	0.161924	0.0309845	-0.452725	-0.0488505	0.000872557	-0.0479779	-0.0479779	0.249694	0.176122	45.7505	11055518	2.36337e+06	0.750306	0.243649
2012	196	SC Firm 196	4	JP	1	MAN	9000	TECH	1	0.227333	0.185239	0.00622906	0.00482025	0.0519892	1.22724	15.4794	0.174974	0.043101	1.75369	-0.0597044	-0.00197766	-0.061682	-0.061682	0.227333	0.185239	54.7789	8232901	1.87178e+06	0.772667	0.228701
2013	196	SC Firm 196	4	JP	1	MAN	9000	TECH	1	0.289138	0.173174	0.0225391	0.0117344	0.0740462	1.66964	15.5959	0.135584	0.0160414	1.61337	0.0560324	0.0108481	0.0668805	0.0668805	0.289138	0.173174	77.189	11085107	2.32171e+06	0.710862	0.283945
2014	196	SC Firm 196	4	JP	1	MAN	9000	TECH	1	0.268501	0.13336	7.80141e-06	3.27061e-06	0.12571	2.01336	15.4456	0.122006	0.04363	-0.1045	-0.0498035	-0.0294776	-0.0792811	-0.0792811	0.268501	0.13336	60.7685	12726952	1.95844e+06	0.731499	0.268495
2007	197	SC Firm 197	4	JP	1	MAN	3000	CGOODS	1	0.322076	0.299456	0.0125904	0.0113425	0.139321	1.07554	14.964	0.419841	0.00667661	2.19219	-0.0040373	-0.0197763	-0.0238136	-0.0238136	0.322076	0.299456	28.5778	1555352	664853	0.677924	0.322659
2008	197	SC Firm 197	4	JP	1	MAN	3000	CGOODS	1	0.32307	0.237434	0.0115718	0.00757995	0.153786	1.36067	14.9968	0.400473	0.0117818	-1.04164	0.0225583	-0.0097713	0.012787	0.012787	0.32307	0.237434	23.0911	2295594	714761	0.67693	0.319713
2009	197	SC Firm 197	4	JP	1	MAN	3000	CGOODS	1	0.292242	0.20823	0.0111536	0.00713287	0.175082	1.40345	15.0316	0.443689	0.0154614	-5.52698	0.000830656	0.000923675	0.00175433	0.00175433	0.292242	0.20823	22.1609	2725536	716799	0.707758	0.289637
2010	197	SC Firm 197	4	JP	1	MAN	3000	CGOODS	1	0.294644	0.268714	0.0121008	0.0106601	0.156972	1.0965	15.1182	0.410704	0.0172875	4.65203	0.0383193	-0.0140111	0.0243082	0.0243082	0.294644	0.268714	24.2397	2242345	823957	0.705356	0.289831
2011	197	SC Firm 197	4	JP	1	MAN	3000	CGOODS	1	0.294399	0.238077	0.00189608	0.00142067	0.14216	1.23657	15.1706	0.388129	0.0067791	-0.452725	0.023072	0.0007371	0.0238091	0.0238091	0.294399	0.238077	26.7178	2861151	894021	0.705601	0.296579
2012	197	SC Firm 197	4	JP	1	MAN	3000	CGOODS	1	0.272936	0.197063	0.00105961	0.000693013	0.147401	1.38502	15.1124	0.372012	0.00427679	1.75369	-0.0333984	0.0240319	-0.00936648	-0.00936648	0.272936	0.197063	30.0523	3245553	796550	0.727064	0.276446
2013	197	SC Firm 197	4	JP	1	MAN	3000	CGOODS	1	0.264163	0.186802	0.019289	0.012429	0.133458	1.41413	15.0985	0.385959	0.00605559	1.61337	-0.00202711	0.0209293	0.0189022	0.0189022	0.264163	0.186802	32.6469	3441171	790484	0.735837	0.261517
2014	197	SC Firm 197	4	JP	1	MAN	3000	CGOODS	1	0.234622	0.151286	0.0180986	0.0106045	0.110076	1.55086	14.9705	0.361357	0.0171491	-0.1045	-0.0497252	0.0321836	-0.0175416	-0.0175416	0.234622	0.151286	35.1066	3659122	652248	0.765378	0.238114
2012	198	SC Firm 198	4	JP	0	SERV	4000	HCARE	1	0.298681	0.166625	0.155164	0.0793796	0.159398	1.79253	13.9302	0.297168	0.00295149	1.75369	-0.0309832	0.0160273	-0.0149559	-0.0149559	0.298681	0.166625	26.5145	2703586	540556	0.701319	0.18487
2013	198	SC Firm 198	4	JP	0	SERV	4000	HCARE	1	0.292134	0.2371	0.141869	0.110716	0.145675	1.23211	13.8799	0.30459	0.0112659	1.61337	-0.00516465	-0.0163184	-0.0214831	-0.0214831	0.292134	0.2371	22.4092	1709094	531166	0.707866	0.183767
2014	198	SC Firm 198	4	JP	0	SERV	4000	HCARE	1	0.298478	0.23192	0.196847	0.148165	0.115361	1.28699	13.7315	0.281117	0.0207413	-0.1045	0.00261698	0.015567	0.018184	0.018184	0.298478	0.23192	27.9691	1774693	535864	0.701522	0.140313
2004	199	SC Firm 199	4	JP	0	SERV	5000	CSERV	1	0.266427	0.100965	0.0810895	0.0265618	0.205031	2.63882	13.0635	0.652424	0.0113331	2.36073	0.0441269	0.0575269	0.101654	0.101654	0.266427	0.100965	6.3772	2563231	287860	0.733573	0.201693
2005	199	SC Firm 199	4	JP	0	SERV	5000	CSERV	1	0.258106	0.115411	0.0504549	0.0195376	0.211734	2.2364	13.1461	0.643339	0.0024895	1.30273	0.00134041	-0.0129678	-0.0116274	-0.0116274	0.258106	0.115411	6.51206	2217864	289362	0.741894	0.222253
2006	199	SC Firm 199	4	JP	0	SERV	5000	CSERV	1	0.278548	0.146475	0.0483283	0.0220738	0.211041	1.90167	13.2144	0.632653	0.00379689	1.6929	0.0453911	-0.0242389	0.0211522	0.0211522	0.278548	0.146475	6.17503	2014398	345695	0.721452	0.245131
2007	199	SC Firm 199	4	JP	0	SERV	5000	CSERV	1	0.219813	0.138417	0.0253996	0.014643	0.223617	1.58805	13.4579	0.625474	0.00754548	2.19219	-0.00908855	0.0397289	0.0306404	0.0306404	0.219813	0.138417	5.25033	2066366	331970	0.780187	0.202602
2008	199	SC Firm 199	4	JP	0	SERV	5000	CSERV	1	0.167085	0.137851	0.0230237	0.0184374	0.211721	1.21207	13.42	0.701212	0.0122658	-1.04164	-0.070046	-0.062692	-0.132738	-0.132738	0.167085	0.137851	6.12157	1462918	233909	0.832915	0.150858
2009	199	SC Firm 199	4	JP	0	SERV	5000	CSERV	1	0.165506	0.107759	0.0150014	0.00918899	0.199494	1.53589	13.3698	0.648578	0.0062043	-5.52698	0.0117318	-0.021652	-0.00992016	-0.00992016	0.165506	0.107759	8.14324	2084528	251755	0.834494	0.156108
2010	199	SC Firm 199	4	JP	0	SERV	5000	CSERV	1	0.194533	0.134801	0.00890385	0.00576215	0.193002	1.44311	13.5126	0.623062	0.00433682	4.65203	0.0564831	-0.0158072	0.040676	0.040676	0.194533	0.134801	9.04601	2276978	354760	0.805467	0.190391
2011	199	SC Firm 199	4	JP	0	SERV	5000	CSERV	1	0.216039	0.119487	0.0141898	0.00703819	0.207438	1.80806	13.5582	0.588299	0.0143534	-0.452725	0.0261085	-0.0768381	-0.0507296	-0.0507296	0.216039	0.119487	10.4523	2973646	403527	0.783961	0.207451
2012	199	SC Firm 199	4	JP	0	SERV	5000	CSERV	1	0.225031	0.105	0.00949435	0.00385778	0.212795	2.14315	13.4172	0.572462	0.00626086	1.75369	-0.0209081	-0.0831284	-0.104037	-0.104037	0.225031	0.105	13.7328	3147177	369222	0.774969	0.220301
2013	199	SC Firm 199	4	JP	0	SERV	5000	CSERV	1	0.195959	0.0784577	0.00503478	0.00176457	0.222454	2.49764	13.3977	0.562406	0.00666821	1.61337	-0.0361002	0.00463725	-0.0314629	-0.0314629	0.195959	0.0784577	15.5784	3662128	311784	0.804041	0.194431
2014	199	SC Firm 199	4	JP	0	SERV	5000	CSERV	1	0.174239	0.0525778	0.00249775	0.000658139	0.212216	3.31392	13.2386	0.524899	0.00505374	-0.1045	-0.0408688	0.00347219	-0.0373966	-0.0373966	0.174239	0.0525778	15.188	4550760	252547	0.825761	0.174451
2005	200	SC Firm 200	4	JP	1	MAN	3000	CGOODS	1	0.177382	0.156496	0.0313838	0.0271217	0.0507107	1.13346	14.1483	0.220808	0.0109423	1.30273	-0.0232124	0.0525713	0.0293588	0.0293588	0.177382	0.156496	13.5871	1968838	365281	0.822618	0.20373
2006	200	SC Firm 200	4	JP	1	MAN	3000	CGOODS	1	0.159946	0.164859	0.0276754	0.0286641	0.0664533	0.970199	14.1611	0.210904	0.0105975	1.6929	-0.0119626	0.0187916	0.00682904	0.00682904	0.159946	0.164859	12.9987	1721675	339862	0.840054	0.203799
2007	200	SC Firm 200	4	JP	1	MAN	3000	CGOODS	1	0.17374	0.175605	0.0277636	0.0281148	0.0714513	0.989383	14.3228	0.213344	0.00265019	2.19219	0.0333472	0.0169466	0.0502939	0.0502939	0.17374	0.175605	12.8378	1974498	420589	0.82626	0.210269
2008	200	SC Firm 200	4	JP	1	MAN	3000	CGOODS	1	0.183932	0.182405	0.0295341	0.0292429	0.0688944	1.00837	14.3711	0.229706	0.00542832	-1.04164	-0.0107924	-0.123916	-0.134708	-0.134708	0.183932	0.182405	10.9236	1780725	397278	0.816068	0.198191
2009	200	SC Firm 200	4	JP	1	MAN	3000	CGOODS	1	0.189702	0.199516	0.042979	0.0456297	0.0390041	0.950814	14.3735	0.231974	0.0212945	-5.52698	0.02349	0.0440028	0.0674928	0.0674928	0.189702	0.199516	14.2997	1819201	453424	0.810298	0.195302
2010	200	SC Firm 200	4	JP	1	MAN	3000	CGOODS	1	0.187457	0.212948	0.0339752	0.0396127	0.0460897	0.880297	14.5041	0.231024	0.00483771	4.65203	0.0123228	-0.00636464	0.00595815	0.00595815	0.187457	0.212948	13.2831	1793767	485328	0.812543	0.193445
2011	200	SC Firm 200	4	JP	1	MAN	3000	CGOODS	1	0.192299	0.221911	0.0350259	0.0416688	0.0680106	0.866561	14.5461	0.221974	0.0159856	-0.452725	0.0105687	-0.00123478	0.00933392	0.00933392	0.192299	0.221911	10.4174	1800676	513552	0.807701	0.195027
2012	200	SC Firm 200	4	JP	1	MAN	3000	CGOODS	1	0.226644	0.280131	0.0870313	0.112357	0.0642031	0.809064	14.4644	0.19512	0.00136783	1.75369	0.0366058	0.0361683	0.0727741	0.0727741	0.226644	0.280131	10.1854	1573914	612475	0.773356	0.192998
2013	200	SC Firm 200	4	JP	1	MAN	3000	CGOODS	1	0.195858	0.2625	0.0766136	0.108138	0.0694737	0.751684	14.4457	0.180074	0.00421337	1.61337	-0.03651	0.0396458	0.00313582	0.00313582	0.195858	0.2625	10.2294	1450397	516242	0.804142	0.179181
2014	200	SC Firm 200	4	JP	1	MAN	3000	CGOODS	1	0.175238	0.213594	0.0564522	0.0710484	0.0605351	0.820423	14.2833	0.163811	0.00517675	-0.1045	-0.0312782	0.0469798	0.0157015	0.0157015	0.175238	0.213594	12.0342	1612813	438054	0.824762	0.188489
2012	201	SC Firm 201	4	JP	0	SERV	5000	CSERV	1	0.304584	0.302	0.064498	0.0637638	0.0872785	1.00856	14.709	0.201692	0.000667343	1.75369	-0.0955523	-0.0424246	-0.137977	-0.137977	0.304584	0.302	15.5873	1536097	664614	0.695416	0.25695
2013	201	SC Firm 201	4	JP	0	SERV	5000	CSERV	1	0.285153	0.285698	0.053792	0.0539281	0.0917903	0.998093	14.6244	0.203503	0.00508827	1.61337	-0.0552336	-0.0154348	-0.0706685	-0.0706685	0.285153	0.285698	14.3395	1392032	556769	0.714847	0.244758
2014	201	SC Firm 201	4	JP	0	SERV	5000	CSERV	1	0.257812	0.223602	0.0471927	0.0394451	0.0600812	1.153	14.3715	0.213402	0.0246644	-0.1045	-0.100729	-0.0562296	-0.156959	-0.156959	0.257812	0.223602	18.3584	1390107	400350	0.742188	0.221604
2007	202	SC Firm 202	4	JP	1	MAN	9000	TECH	1	0.328504	0.0398582	0.16766	0.0168057	0.369515	7.29543	14.7807	0.044969	0.000658599	2.19219	0.0357514	0.00661048	0.0423619	0.0423619	0.328504	0.0398582	4.04298	29307570	1.21664e+06	0.671496	0.193242
2008	202	SC Firm 202	4	JP	1	MAN	9000	TECH	1	0.247617	0.0446019	0.113464	0.017831	0.397801	5.5517	14.8046	0.0936716	0.0692034	-1.04164	-0.138371	-0.00339308	-0.141764	-0.141764	0.247617	0.0446019	3.01103	16718602	780494	0.752383	0.151323
2009	202	SC Firm 202	4	JP	1	MAN	9000	TECH	1	0.258818	0.0504722	0.0323201	0.00505842	0.370503	5.12792	14.9123	0.0648359	0.0613003	-5.52698	0.0844149	-0.000885475	0.0835295	0.0835295	0.258818	0.0504722	3.86313	21790406	1.15827e+06	0.741182	0.234062
2010	202	SC Firm 202	4	JP	1	MAN	9000	TECH	1	0.188224	0.0484457	0.000553298	0.000121543	0.359117	3.88525	15.0731	0.0611739	0.00391457	4.65203	-0.0159373	-0.00289172	-0.018829	-0.018829	0.188224	0.0484457	3.22199	20974426	1.06785e+06	0.811776	0.187774
2011	202	SC Firm 202	4	JP	1	MAN	9000	TECH	1	0.170922	0.054212	0.000313234	8.71094e-05	0.313526	3.15285	15.1099	0.0614087	0.0320453	-0.452725	0.0136195	0.00108487	0.0147043	0.0147043	0.170922	0.054212	3.23916	20242873	1.16031e+06	0.829078	0.170663
2012	202	SC Firm 202	4	JP	1	MAN	9000	TECH	1	0.268099	0.0715224	0	0	0.268714	3.74847	15.1079	0.0607807	0.029918	1.75369	0.121068	0.00971102	0.130779	0.130779	0.268099	0.0715224	5.56348	27465704	2.11573e+06	0.731901	0.268099
2013	202	SC Firm 202	4	JP	1	MAN	9000	TECH	1	0.270908	0.0733838	0.0083782	0.00179757	0.246932	3.69166	15.1915	0.0707599	0.0138589	1.61337	0.0140536	0.00498131	0.0190349	0.0190349	0.270908	0.0733838	3.64139	28177064	2.2315e+06	0.729092	0.264791
2014	202	SC Firm 202	4	JP	1	MAN	9000	TECH	1	0.279447	0.0892738	0.0143778	0.00367356	0.212531	3.13022	15.0873	0.066956	0.0250187	-0.1045	0.0134218	-0.00503809	0.00838367	0.00838367	0.279447	0.0892738	4.09993	23913129	2.34408e+06	0.720553	0.268963
2004	203	SC Firm 203	4	JP	0	SERV	4000	HCARE	1	0.220191	0.0914856	0.0188585	0.00680799	0.160122	2.40684	14.872	0.218866	0.013955	2.36073	-0.0314208	0.0249359	-0.00648483	-0.00648483	0.220191	0.0914856	16.4306	8781650	884295	0.779809	0.205209
2005	203	SC Firm 203	4	JP	0	SERV	4000	HCARE	1	0.19307	0.0523897	0.00364663	0.000844986	0.210654	3.68526	14.8359	0.174085	0.0341447	1.30273	-0.0353899	-0.0395986	-0.0749885	-0.0749885	0.19307	0.0523897	21.4552	13517173	747312	0.80693	0.190121
2006	203	SC Firm 203	4	JP	0	SERV	4000	HCARE	1	0.156921	0.0497773	0.00115626	0.000325692	0.156155	3.15247	14.8235	0.184261	0.0333683	1.6929	-0.0355355	0.00092056	-0.034615	-0.034615	0.156921	0.0497773	20.6285	11631729	609327	0.843079	0.15595
2007	203	SC Firm 203	4	JP	0	SERV	4000	HCARE	1	0.164201	0.0864754	0.000890818	0.000429426	0.177837	1.89882	14.946	0.201546	0.0134912	2.19219	0.0163872	-0.0378508	-0.0214635	-0.0214635	0.164201	0.0864754	14.2159	7150548	676880	0.835799	0.16346
2008	203	SC Firm 203	4	JP	0	SERV	4000	HCARE	1	0.173655	0.0945976	0	0	0.149723	1.83573	15.0988	0.205523	0.0265749	-1.04164	0.0454968	0.029584	0.0750807	0.0750807	0.173655	0.0945976	19.0851	8778361	917174	0.826345	0.173657
2009	203	SC Firm 203	4	JP	0	SERV	4000	HCARE	1	0.199142	0.0991227	3.46492e-05	1.53321e-05	0.188922	2.00904	15.3453	0.173275	0.0318754	-5.52698	0.0415113	-0.00490849	0.0366028	0.0366028	0.199142	0.0991227	18.8189	10530927	1.15871e+06	0.800858	0.199114
2010	203	SC Firm 203	4	JP	0	SERV	4000	HCARE	1	0.118071	0.0763297	0	0	0.16579	1.54685	15.3581	0.173132	0.0158709	4.65203	-0.0670227	0.0221922	-0.0448304	-0.0448304	0.118071	0.0763297	18.2732	8944347	739137	0.881929	0.118071
2011	203	SC Firm 203	4	JP	0	SERV	4000	HCARE	1	0.14154	0.104699	0	0	0.146836	1.35187	15.3954	0.155458	0.00944843	-0.452725	0.0349385	0.00815145	0.0430899	0.0430899	0.14154	0.104699	16.4934	8392015	981388	0.85846	0.141735
2012	203	SC Firm 203	4	JP	0	SERV	4000	HCARE	1	0.166429	0.0956285	0.000477535	0.000252962	0.137659	1.74037	15.3099	0.221681	0.000942373	1.75369	0.0345181	0.0110343	0.0455524	0.0455524	0.166429	0.0956285	19.1954	11709766	1.23819e+06	0.833571	0.18147
2013	203	SC Firm 203	4	JP	0	SERV	4000	HCARE	1	0.162517	0.0715101	0.00039888	0.000158348	0.133715	2.27265	15.2076	0.201438	0.0019556	1.61337	-0.0244874	-0.0188173	-0.0433046	-0.0433046	0.162517	0.0715101	22.1113	13971581	1.07606e+06	0.837483	0.179697
2014	203	SC Firm 203	4	JP	0	SERV	4000	HCARE	1	0.179459	0.065541	0.000352533	0.000113081	0.122697	2.73812	15.1643	0.189639	0.00732312	-0.1045	0.00531991	-0.0319436	-0.0266237	-0.0266237	0.179459	0.065541	24.8117	15810726	1.10893e+06	0.820541	0.193668
2004	204	SC Firm 204	4	JP	1	MAN	3000	CGOODS	1	0.227131	0.275124	0.000468234	0.000604642	0.153899	0.825558	14.4927	0.546692	0.0175696	2.36073	0.0106136	0.0141662	0.0247798	0.0247798	0.227131	0.275124	15.1503	661471	251059	0.772869	0.22767
2005	204	SC Firm 204	4	JP	1	MAN	3000	CGOODS	1	0.173213	0.153448	0.0221168	0.0191928	0.163377	1.12881	14.3595	0.57844	0.001553	1.30273	-0.103585	-0.040129	-0.143714	-0.143714	0.173213	0.153448	16.9607	866737	157107	0.826787	0.156197
2006	204	SC Firm 204	4	JP	1	MAN	3000	CGOODS	1	0.168162	0.176544	0.0218167	0.0231068	0.150546	0.952521	14.3257	0.556451	0.0116541	1.6929	-0.00528053	0.00678133	0.0015008	0.0015008	0.168162	0.176544	15.5617	710484	152323	0.831838	0.161344
2007	204	SC Firm 204	4	JP	1	MAN	3000	CGOODS	1	0.163795	0.203845	0	0	0.146591	0.803525	14.4282	0.521979	0.0071383	2.19219	0.00910233	0.0284936	0.0375959	0.0375959	0.163795	0.203845	15.211	629933	161286	0.836205	0.187576
2008	204	SC Firm 204	4	JP	1	MAN	3000	CGOODS	1	0.161149	0.262003	0	0	0.128658	0.751684	14.6366	0.516186	0.00912786	-1.04164	0.0266507	0.0544874	0.0811381	0.0811381	0.161149	0.262003	14.3473	544324	193245	0.838851	0.185338
2009	204	SC Firm 204	4	JP	1	MAN	3000	CGOODS	1	0.177638	0.267602	0.0305295	0.0505727	0.119089	0.751684	14.5498	0.531523	0.0126448	-5.52698	0.0121885	-0.0195902	-0.00740174	-0.00740174	0.177638	0.267602	12.5243	567853	207481	0.822362	0.173565
2010	204	SC Firm 204	4	JP	1	MAN	3000	CGOODS	1	0.198795	0.341174	0.0178818	0.0366096	0.128595	0.751684	14.6914	0.491367	0.0173786	4.65203	0.0480165	0.0339198	0.0819362	0.0819362	0.198795	0.341174	13.3186	528251	273555	0.801205	0.20235
2004	205	SC Firm 205	4	JP	1	MAN	3000	CGOODS	1	0.160531	0.144208	0.00171595	0.00151238	0.153809	1.11319	14.7205	0.414247	0.00915788	2.36073	0.00925209	-0.00306873	0.00618336	0.00618336	0.160531	0.144208	25.5092	1926817	324685	0.839469	0.192441
2005	205	SC Firm 205	4	JP	1	MAN	3000	CGOODS	1	0.12129	0.0938897	0.000996862	0.000748518	0.123489	1.29183	14.5503	0.403844	0.0174574	1.30273	-0.0621583	-0.00790089	-0.0700592	-0.0700592	0.12129	0.0938897	23.3633	2071745	214671	0.87871	0.167297
2006	205	SC Firm 205	4	JP	1	MAN	3000	CGOODS	1	0.142245	0.12716	0.0187668	0.0165244	0.104597	1.11863	14.8288	0.479641	0.0109129	1.6929	0.0584547	0.242775	0.30123	0.30123	0.142245	0.12716	23.1493	2501487	364432	0.857755	0.162317
2007	205	SC Firm 205	4	JP	1	MAN	3000	CGOODS	1	0.166844	0.179958	0.0456734	0.0498332	0.122249	0.927125	15.118	0.449943	0.00772812	2.19219	0.0383152	0.0151559	0.053471	0.053471	0.166844	0.179958	21.9902	2155714	473071	0.833156	0.155607
2008	205	SC Firm 205	4	JP	1	MAN	3000	CGOODS	1	0.1289	0.178483	0.000363662	0.000533852	0.116188	0.751684	15.2893	0.489771	0.00904575	-1.04164	-0.0254466	0.0219042	-0.0035424	-0.0035424	0.1289	0.178483	21.5441	1818453	395077	0.8711	0.155397
2004	206	SC Firm 206	4	JP	1	MAN	9000	TECH	1	0.303334	0.102801	0.0885369	0.0249249	0.232518	2.9507	14.6201	0.173077	0.0784968	2.36073	-0.0740635	-0.16491	-0.238974	-0.238974	0.303334	0.102801	50.4155	7336410	840601	0.696666	0.235661
2005	206	SC Firm 206	4	JP	1	MAN	9000	TECH	1	0.264696	0.065845	0.000155059	3.0365e-05	0.20951	4.01999	14.5847	0.144802	0.0147375	1.30273	-0.017265	0.0471578	0.0298928	0.0298928	0.264696	0.065845	57.3061	11195526	789130	0.735304	0.264582
2006	206	SC Firm 206	4	JP	1	MAN	9000	TECH	1	0.195366	0.0701887	3.39205e-05	1.05462e-05	0.179156	2.78344	14.5063	0.135517	0.0203274	1.6929	-0.0583194	0.0241963	-0.034123	-0.034123	0.195366	0.0701887	28.2541	8050620	607718	0.804634	0.195339
2007	206	SC Firm 206	4	JP	1	MAN	9000	TECH	1	0.148987	0.0935417	0	0	0.107712	1.59273	14.4205	0.169962	0.0558313	2.19219	-0.0540917	-0.143653	-0.197745	-0.197745	0.148987	0.0935417	15.8396	4320446	445847	0.851013	0.148987
2008	206	SC Firm 206	4	JP	1	MAN	9000	TECH	1	0.190256	0.118113	0	0	-0.0340192	1.6108	13.5613	0.168139	0.129833	-1.04164	-0.0278361	-0.0344709	-0.0623069	-0.0623069	0.190256	0.118113	26.0112	2904021	388942	0.809744	0.190256
2009	206	SC Firm 206	4	JP	1	MAN	9000	TECH	1	0.203649	0.081886	0	0	-0.0340192	2.48698	13.2525	0.174284	0.0812011	-5.52698	0.0109746	-0.00971044	0.00126418	0.00126418	0.203649	0.081886	22.5288	4609245	411096	0.796351	0.203649
2010	206	SC Firm 206	4	JP	1	MAN	9000	TECH	1	0.233928	0.138543	0	0	0.0585208	1.68848	13.9964	0.176794	0.0675876	4.65203	0.0443531	-0.0941308	-0.0497777	-0.0497777	0.233928	0.138543	9.5269	3154226	507276	0.766072	0.233928
2005	207	SC Firm 207	4	JP	1	MAN	2000	IND	1	0.292382	0.100016	0.0447353	0.0124387	0.17156	2.92334	13.2801	0.292573	0.0179863	1.30273	-0.0296331	0.0566968	0.0270637	0.0270637	0.292382	0.100016	70.3302	2220682	246787	0.707618	0.259244
2006	207	SC Firm 207	4	JP	1	MAN	2000	IND	1	0.284853	0.120605	0.0136726	0.00475027	0.190886	2.36186	13.5029	0.295303	0.0178086	1.6929	0.0294009	0.0206535	0.0500544	0.0500544	0.284853	0.120605	55.7086	2006557	275191	0.715147	0.27494
2007	207	SC Firm 207	4	JP	1	MAN	2000	IND	1	0.248375	0.178152	0.00668606	0.00439606	0.193069	1.39417	13.7299	0.347696	0.00162316	2.19219	0.0167729	0.0332676	0.0500405	0.0500405	0.248375	0.178152	20.2924	1361445	295121	0.751625	0.243315
2008	207	SC Firm 207	4	JP	1	MAN	2000	IND	1	0.304384	0.29544	0.243342	0.235584	0.0381943	1.03027	13.1943	0.391707	0.114141	-1.04164	0.0689908	-0.0103242	0.0586665	0.0586665	0.304384	0.29544	62.4054	910073	381617	0.695616	0.0806737
2009	207	SC Firm 207	4	JP	1	MAN	2000	IND	1	0.292426	0.154307	0.12877	0.0612572	0.0806886	1.8951	13.4007	0.431809	0.0259075	-5.52698	0.00550338	0.0107467	0.0162501	0.0162501	0.292426	0.154307	60.4611	2131605	388936	0.707574	0.187844
2010	207	SC Firm 207	4	JP	1	MAN	2000	IND	1	0.300405	0.177874	0.0996931	0.0528456	0.15709	1.68886	13.997	0.384315	0.053676	4.65203	0.0681304	0.0182403	0.0863707	0.0863707	0.300405	0.177874	52.1835	2324931	503019	0.699595	0.222937
2011	207	SC Firm 207	4	JP	1	MAN	2000	IND	1	0.247281	0.167966	0.0949172	0.0605422	0.122293	1.4722	13.8905	0.406432	0.0250525	-0.452725	-0.0594077	-0.00116566	-0.0605734	-0.0605734	0.247281	0.167966	52.0288	2009072	405580	0.752719	0.168342
2012	207	SC Firm 207	4	JP	1	MAN	2000	IND	1	0.294488	0.197454	0.151989	0.09555	0.112246	1.49142	13.8104	0.356627	0.00327983	1.75369	0.0490816	-0.0120976	0.036984	0.036984	0.294488	0.197454	66.3814	1978164	486697	0.705512	0.168038
2013	207	SC Firm 207	4	JP	1	MAN	2000	IND	1	0.2793	0.177817	0.132966	0.078837	0.136859	1.57071	13.8321	0.370608	0.0194689	1.61337	-0.0158454	0.000930045	-0.0149154	-0.0149154	0.2793	0.177817	81.2824	2129551	460568	0.7207	0.168775
2014	207	SC Firm 207	4	JP	1	MAN	2000	IND	1	0.24815	0.101017	0.0688712	0.0245635	0.162238	2.4565	13.8627	0.327734	0.0216178	-0.1045	-0.0257627	0.035811	0.0100484	0.0100484	0.24815	0.101017	95.4436	3713221	417249	0.75185	0.192539
2004	208	SC Firm 208	4	JP	0	SERV	4000	HCARE	1	0.306325	0.158748	0.00181094	0.000774658	0.164108	1.92963	15.4204	0.185484	0.00296782	2.36073	0.0025564	-0.00968424	-0.00712784	-0.00712784	0.306325	0.158748	41.9776	10045482	1.89563e+06	0.693675	0.30521
2005	208	SC Firm 208	4	JP	0	SERV	4000	HCARE	1	0.305021	0.13381	0.000794662	0.00027985	0.160784	2.2795	15.4467	0.172212	0.00213656	1.30273	0.00652976	0.0140358	0.0205655	0.0205655	0.305021	0.13381	54.9534	12539337	1.9371e+06	0.694979	0.30459
2006	208	SC Firm 208	4	JP	0	SERV	4000	HCARE	1	0.302045	0.133641	0.000426692	0.000152135	0.166732	2.26013	15.5601	0.168968	0.0039235	1.6929	0.0140139	-0.00902412	0.00498982	0.00498982	0.302045	0.133641	39.0937	13168729	2.03135e+06	0.697955	0.301868
2004	209	SC Firm 209	4	JP	1	MAN	2000	IND	1	0.150784	0.0750097	0	0	0.161591	2.01019	14.942	0.241146	0.0262149	2.36073	0.0416397	-0.0872099	-0.0455702	-0.0455702	0.150784	0.0750097	84.8881	13882941	1.1258e+06	0.849216	0.150784
2005	209	SC Firm 209	4	JP	1	MAN	2000	IND	1	0.14278	0.0501929	0	0	0.167217	2.84462	14.9907	0.217059	0.00373258	1.30273	-0.00384513	0.0203431	0.016498	0.016498	0.14278	0.0501929	98.4791	20744998	1.09628e+06	0.85722	0.14278
2006	209	SC Firm 209	4	JP	1	MAN	2000	IND	1	0.166125	0.0669419	0	0	0.182355	2.48163	15.0859	0.210812	0.0110197	1.6929	0.0304471	-0.0605953	-0.0301482	-0.0301482	0.166125	0.0669419	96.6681	18709283	1.34229e+06	0.833875	0.166125
2007	209	SC Firm 209	4	JP	1	MAN	2000	IND	1	0.150641	0.0789786	0	0	0.192969	1.90737	15.3616	0.202567	0.00698353	2.19219	0.0226616	-0.00149571	0.0211659	0.0211659	0.150641	0.0789786	69.6721	18425084	1.57997e+06	0.849359	0.161103
2008	209	SC Firm 209	4	JP	1	MAN	2000	IND	1	0.105544	0.0633477	0	0	0.153498	1.6661	15.1837	0.222926	0.0300792	-1.04164	-0.0553773	-0.0844381	-0.139815	-0.139815	0.105544	0.0633477	93.3377	15322039	1.03626e+06	0.894456	0.105544
2009	209	SC Firm 209	4	JP	1	MAN	2000	IND	1	0.0922637	0.0394637	0	0	0.0772253	2.33794	14.8129	0.237521	0.0543298	-5.52698	-0.0163538	-0.078798	-0.0951519	-0.0951519	0.0922637	0.0394637	152.931	21424740	880238	0.907736	0.0922637
2010	209	SC Firm 209	4	JP	1	MAN	2000	IND	1	0.120628	0.0467745	0	0	0.200472	2.57892	15.4956	0.204398	0.0888208	4.65203	0.0483754	-0.0331305	0.0152449	0.0152449	0.120628	0.0467745	153.106	29948936	1.46959e+06	0.879372	0.120628
2011	209	SC Firm 209	4	JP	1	MAN	2000	IND	1	0.132053	0.0459486	0	0	0.209884	2.87392	15.688	0.208524	0.00628119	-0.452725	0.0244423	-0.00696261	0.0174797	0.0174797	0.132053	0.0459486	185.095	37444408	1.80338e+06	0.867947	0.132053
2012	209	SC Firm 209	4	JP	1	MAN	2000	IND	1	0.106514	0.0422086	0	0	0.166259	2.52352	15.4816	0.217224	0.0315383	1.75369	-0.0328169	0.0445856	0.0117687	0.0117687	0.106514	0.0422086	183.072	31283628	1.37863e+06	0.893486	0.106514
2013	209	SC Firm 209	4	JP	1	MAN	2000	IND	1	0.11152	0.040021	0	0	0.135819	2.78653	15.2904	0.195306	0.0208389	1.61337	0.00566361	0.031252	0.0369156	0.0369156	0.11152	0.040021	166.96	34838273	1.45239e+06	0.88848	0.11152
2014	209	SC Firm 209	4	JP	1	MAN	2000	IND	1	0.144233	0.0425924	0	0	0.198262	3.38635	15.6197	0.165004	0.0443174	-0.1045	0.0359811	0.0306524	0.0666335	0.0666335	0.144233	0.0425924	174.952	43498779	1.93514e+06	0.855767	0.144233
2010	210	SC Firm 210	5	SK	0	SERV	4000	HCARE	1	0.295022	0.147487	0.123038	0.0548208	0.213221	2.00033	13.4699	0.287483	0.0223654	6.49679	-0.146094	0.109288	-0.0368061	-0.0368061	0.295022	0.147487	114.124	1170085	202427	0.704978	0.196958
2011	210	SC Firm 210	5	SK	0	SERV	4000	HCARE	1	0.279394	0.135356	0.0573683	0.0239832	0.114396	2.06414	13.4043	0.292454	0.0705854	3.6817	0.00681789	0.0393578	0.0461757	0.0461757	0.279394	0.135356	117.187	1325435	207490	0.720606	0.237661
2012	210	SC Firm 210	5	SK	0	SERV	4000	HCARE	1	0.289921	0.172679	0.108034	0.0583061	0.0943185	1.67896	13.5457	0.315183	0.0150864	2.29238	0.0587635	0.0453019	0.104065	0.104065	0.289921	0.172679	120.476	1246825	260237	0.710079	0.210052
2013	210	SC Firm 210	5	SK	0	SERV	4000	HCARE	1	0.249004	0.164595	0.0550319	0.0334482	0.0879666	1.51283	13.6486	0.333369	0.00462633	2.89622	0.00167331	0.0856075	0.0872808	0.0872808	0.249004	0.164595	118.628	1329776	261998	0.750996	0.210881
2014	210	SC Firm 210	5	SK	0	SERV	4000	HCARE	1	0.322792	0.209788	0.151197	0.0902586	0.0904768	1.53866	13.7017	0.307335	0.00107485	3.31015	0.107558	-0.0088493	0.0987085	0.0987085	0.322792	0.209788	125.355	1480035	392925	0.677208	0.208373
2010	211	SC Firm 211	5	SK	1	MAN	2000	IND	1	0.208727	0.32276	0.122366	0.201216	0.0542852	0.751684	14.8382	0.321435	0.0123709	6.49679	-0.145211	0.0221017	-0.123109	-0.123109	0.208727	0.32276	348.93	3326794	1.58549e+06	0.791273	0.20306
2011	211	SC Firm 211	5	SK	1	MAN	2000	IND	1	0.241668	0.378836	0.139272	0.236443	0.0488846	0.751684	14.8836	0.364407	0.00910323	3.6817	-0.00849905	-0.206727	-0.215226	-0.215226	0.241668	0.378836	246.866	2511356	1.53163e+06	0.758332	0.197093
2012	211	SC Firm 211	5	SK	1	MAN	2000	IND	1	0.215285	0.347833	0.132632	0.229152	0.0536477	0.751684	14.9317	0.396968	0.00879162	2.29238	-0.0233569	-0.0583568	-0.0817137	-0.0817137	0.215285	0.347833	278.314	2590650	1.38172e+06	0.784715	0.157597
2013	211	SC Firm 211	5	SK	1	MAN	2000	IND	1	0.215987	0.255011	0.148483	0.178081	0.0553507	0.846971	14.9406	0.372593	0.00255882	2.89622	0.0103472	0.00202747	0.0123746	0.0123746	0.215987	0.255011	446.403	4239666	1.45124e+06	0.784013	0.145591
2014	211	SC Firm 211	5	SK	1	MAN	2000	IND	1	0.201201	0.250798	0.129099	0.164585	0.0495001	0.802242	14.9504	0.296151	0.000886371	3.31015	0.0179366	0.127279	0.145216	0.145216	0.201201	0.250798	475.798	4759569	1.59328e+06	0.798799	0.165553
2008	212	SC Firm 212	5	SK	1	MAN	1000	BMAT	1	0.319461	0.317099	0.227795	0.225886	0.254812	1.00745	14.7099	0.42084	0.00601138	2.82921	-0.250069	-0.109537	-0.359606	-0.359606	0.319461	0.317099	58.1358	1460839	678327	0.680539	0.131155
2009	212	SC Firm 212	5	SK	1	MAN	1000	BMAT	1	0.29979	0.240601	0.174906	0.135598	0.176511	1.24601	14.8224	0.380956	0.0517483	0.707518	0.0543505	0.0242213	0.0785718	0.0785718	0.29979	0.240601	174.957	2615082	828536	0.70021	0.174361
2010	212	SC Firm 212	5	SK	1	MAN	1000	BMAT	1	0.278487	0.190153	0.163418	0.10621	0.191173	1.46454	15.0467	0.354366	0.027272	6.49679	0.0448759	-0.0331111	0.0117648	0.0117648	0.278487	0.190153	244.56	4206522	987696	0.721513	0.176267
2011	212	SC Firm 212	5	SK	1	MAN	1000	BMAT	1	0.219843	0.153395	0.118035	0.0792339	0.233305	1.43318	15.3833	0.337133	0.0285324	3.6817	-0.0285723	0.011329	-0.0172434	-0.0172434	0.219843	0.153395	262.862	4824211	874093	0.780157	0.159604
2012	212	SC Firm 212	5	SK	1	MAN	1000	BMAT	1	0.172427	0.111677	0.074419	0.0462687	0.178539	1.54399	15.4585	0.34527	0.0395092	2.29238	-0.0156838	0.0114871	-0.00419672	-0.00419672	0.172427	0.111677	379.519	6373205	801215	0.827573	0.152293
2013	212	SC Firm 212	5	SK	1	MAN	1000	BMAT	1	0.138656	0.115294	0.0360653	0.0293988	0.145428	1.20263	15.3395	0.361713	0.0257651	2.89622	-0.0255465	-0.0057951	-0.0313416	-0.0313416	0.138656	0.115294	303.001	5191582	676562	0.861344	0.150993
2014	212	SC Firm 212	5	SK	1	MAN	1000	BMAT	1	0.133559	0.0937844	0.0339937	0.0230804	0.148533	1.4241	15.3237	0.374263	0.00289597	3.31015	0.00251309	0.0105017	0.0130148	0.0130148	0.133559	0.0937844	369.201	6662825	689537	0.866441	0.148247
2009	213	SC Firm 213	5	SK	1	MAN	2000	IND	1	0.292236	0.249752	0.126175	0.104276	0.17672	1.1701	15.7434	0.153815	0.0308671	0.707518	-0.250069	-0.0573087	-0.307378	-0.307378	0.292236	0.249752	62.2642	9055935	3.01466e+06	0.707764	0.206559
2010	213	SC Firm 213	5	SK	1	MAN	2000	IND	1	0.266893	0.202086	0.0811696	0.0578983	0.163718	1.32069	15.9509	0.149709	0.00582486	6.49679	0.0217403	0.039656	0.0613963	0.0613963	0.266893	0.202086	77.2156	12958629	3.282e+06	0.733107	0.219357
2011	213	SC Firm 213	5	SK	1	MAN	2000	IND	1	0.286848	0.283063	0.116038	0.114146	0.109844	1.01337	15.9769	0.150617	0.0375764	3.6817	0.036054	-0.00830448	0.0277495	0.0277495	0.286848	0.283063	53.0912	9507626	3.75382e+06	0.713152	0.210538
2012	213	SC Firm 213	5	SK	1	MAN	2000	IND	1	0.281317	0.295082	0.122572	0.129974	0.0985624	0.953351	16.0258	0.150381	0.0080654	2.29238	0.0294747	0.0233814	0.052856	0.052856	0.281317	0.295082	61.0979	10016979	4.19315e+06	0.718683	0.197371
2013	213	SC Firm 213	5	SK	1	MAN	2000	IND	1	0.273289	0.297111	0.127083	0.140627	0.0882488	0.919818	16.0495	0.142739	0.00564756	2.89622	0.00738735	-0.00187375	0.0055136	0.0055136	0.273289	0.297111	60.9814	10195503	4.30965e+06	0.726711	0.183854
2014	213	SC Firm 213	5	SK	1	MAN	2000	IND	1	0.277155	0.308315	0.130319	0.148359	0.0766912	0.898934	16.0157	0.142949	0.00670582	3.31015	0.00541331	-0.0126637	-0.00725036	-0.00725036	0.277155	0.308315	55.9978	9861031	4.3955e+06	0.722845	0.184815
2004	214	SC Firm 214	5	SK	1	MAN	3000	CGOODS	1	0.173586	0.202905	0.00590436	0.00714655	0.0978404	0.855503	13.9063	0.265008	0.0410736	4.89985	-0.0184656	0.172079	0.153613	0.153613	0.173586	0.202905	76.611	961339	244715	0.826414	0.185753
2005	214	SC Firm 214	5	SK	1	MAN	3000	CGOODS	1	0.160458	0.137781	0.00580605	0.004859	0.0881997	1.16459	13.9686	0.259664	0.0084191	3.92369	0.0110453	0.0601291	0.0711744	0.0711744	0.160458	0.137781	118.721	1644602	262805	0.839542	0.228276
2006	214	SC Firm 214	5	SK	1	MAN	3000	CGOODS	1	0.102906	0.109668	0.00631818	0.00678135	0.0633782	0.938338	14.0032	0.249835	0.0123686	5.17613	-0.0222563	0.0873207	0.0650644	0.0650644	0.102906	0.109668	130.192	1754176	216073	0.897094	0.221291
2007	214	SC Firm 214	5	SK	1	MAN	3000	CGOODS	1	0.125397	0.103946	0.00749849	0.00607565	0.0641449	1.20637	14.0486	0.216567	0.000179613	5.46341	0.0330448	0.0243187	0.0573635	0.0573635	0.125397	0.103946	180.613	2529114	293387	0.874603	0.241175
2004	215	SC Firm 215	5	SK	1	MAN	3000	CGOODS	1	0.132732	0.031845	0	0	0.309742	4.16805	12.5415	0.060077	0.0807827	4.89985	0.0543452	0.134779	0.189124	0.189124	0.132732	0.031845	80.9584	1434002	47167.8	0.867268	0.132732
2005	215	SC Firm 215	5	SK	1	MAN	3000	CGOODS	1	0.139477	0.0400097	0	0	0.217641	3.48608	12.7258	0.185888	0.0681935	3.92369	0.0355274	0.0245377	0.0600651	0.0600651	0.139477	0.0400097	76.2359	1518542	63288.6	0.860523	0.139477
2006	215	SC Firm 215	5	SK	1	MAN	3000	CGOODS	1	0.174003	0.079449	0	0	0.150561	2.19012	12.8059	0.166928	0.0581594	5.17613	0.0579277	-0.00444558	0.0534821	0.0534821	0.174003	0.079449	57.3488	1099264	94873	0.825997	0.174003
2007	215	SC Firm 215	5	SK	1	MAN	3000	CGOODS	1	0.186129	0.0957393	0	0	0.135413	1.94413	12.7724	0.228591	0.00370174	5.46341	0.0235429	-0.036876	-0.0133331	-0.0133331	0.186129	0.0957393	52.3138	1025833	108611	0.813871	0.186129
2008	215	SC Firm 215	5	SK	1	MAN	3000	CGOODS	1	0.201836	0.0677862	0	0	0.13425	2.97753	12.5239	0.313877	0.00417555	2.82921	-0.0624872	-0.143971	-0.206459	-0.206459	0.201836	0.0677862	41.8324	1140541	82934.7	0.798164	0.201836
2009	215	SC Firm 215	5	SK	1	MAN	3000	CGOODS	1	0.252718	0.0797824	0	0	0.301079	3.16759	13.2094	0.19939	0.126086	0.707518	0.139364	0.0615706	0.200935	0.200935	0.252718	0.0797824	128.216	2132657	184900	0.747282	0.254569
2010	215	SC Firm 215	5	SK	1	MAN	3000	CGOODS	1	0.26906	0.0647873	0.00487881	0.000921824	0.196415	4.15298	13.2857	0.191969	0.0700728	6.49679	0.066645	0.0117565	0.0784015	0.0784015	0.26906	0.0647873	184.415	3547843	245778	0.73094	0.265477
2011	215	SC Firm 215	5	SK	1	MAN	3000	CGOODS	1	0.231572	0.0390867	0.0142628	0.0019492	0.144782	5.92458	13.1722	0.329012	0.0380798	3.6817	-0.0241543	0.000405572	-0.0237487	-0.0237487	0.231572	0.0390867	265.888	5471538	222564	0.768428	0.220454
2012	215	SC Firm 215	5	SK	1	MAN	3000	CGOODS	1	0.239025	0.0997959	0.0120034	0.00426963	0.143983	2.39514	13.4712	0.323375	0.00497418	2.29238	0.059321	0.00901205	0.0683331	0.0683331	0.239025	0.0997959	141.031	2670352	296033	0.760975	0.230909
2013	215	SC Firm 215	5	SK	1	MAN	3000	CGOODS	1	0.228587	0.0657618	0.00299604	0.000713334	0.161747	3.47598	13.4883	0.167832	0.0168689	2.89622	0.0185958	-0.00344915	0.0151466	0.0151466	0.228587	0.0657618	236.779	4577982	322248	0.771413	0.226325
2014	215	SC Firm 215	5	SK	1	MAN	3000	CGOODS	1	0.199108	0.0835298	0	0	0.18313	2.38367	13.5508	0.141768	0.017703	3.31015	-0.00820322	-0.00198216	-0.0101854	-0.0101854	0.199108	0.0835298	166.529	3395730	309497	0.800892	0.199108
2007	216	SC Firm 216	5	SK	1	MAN	3000	CGOODS	1	0.286904	0.085026	0.0198447	0.00465456	0.224842	3.37431	14.2586	0.519455	0.0748836	5.46341	-0.00067463	0.00286099	0.00218636	0.00218636	0.286904	0.085026	75.879	4410914	409894	0.713096	0.272466
2008	216	SC Firm 216	5	SK	1	MAN	3000	CGOODS	1	0.274878	0.0764187	0.0223521	0.00496558	0.209554	3.597	14.1006	0.542838	0.0104497	2.82921	-0.0614387	-0.153017	-0.214456	-0.214456	0.274878	0.0764187	52.0121	4048912	335014	0.725122	0.258299
2009	216	SC Firm 216	5	SK	1	MAN	3000	CGOODS	1	0.259049	0.0898021	0.0154436	0.00440706	0.225127	2.88467	14.3269	0.535683	0.0113748	0.707518	0.0368064	0.0305607	0.0673671	0.0673671	0.259049	0.0898021	80.1029	3957922	390497	0.740951	0.247426
2010	216	SC Firm 216	5	SK	1	MAN	3000	CGOODS	1	0.216327	0.0771911	0.0174635	0.0053571	0.179479	2.80248	14.5225	0.646048	0.0208021	6.49679	0.0400243	0.0415791	0.0816034	0.0816034	0.216327	0.0771911	100.743	5728150	479148	0.783673	0.239638
2011	216	SC Firm 216	5	SK	1	MAN	3000	CGOODS	1	0.194959	0.0677907	0.0329557	0.0101297	0.161411	2.87589	14.6063	0.588001	0.010198	3.6817	-0.0022024	0.00568738	0.00348497	0.00348497	0.194959	0.0677907	90.9641	6515299	473796	0.805041	0.216703
2012	216	SC Firm 216	5	SK	1	MAN	3000	CGOODS	1	0.179397	0.0640952	0.0305767	0.00978404	0.154313	2.79892	14.8013	0.583838	0.00827727	2.29238	0.012931	0.0247333	0.0376643	0.0376643	0.179397	0.0640952	113.762	7455676	510600	0.820603	0.202984
2013	216	SC Firm 216	5	SK	1	MAN	3000	CGOODS	1	0.202638	0.0934556	0.0555805	0.0233164	0.14457	2.16828	14.8987	0.569115	0.00849143	2.89622	0.0451136	0.00526368	0.0503773	0.0503773	0.202638	0.0934556	95.2835	6371439	656831	0.797362	0.202186
2014	216	SC Firm 216	5	SK	1	MAN	3000	CGOODS	1	0.224163	0.0523681	0.0491075	0.00978097	0.181181	4.28052	15.081	0.452343	0.0265435	3.31015	0.0379293	-0.0208092	0.0171201	0.0171201	0.224163	0.0523681	203.129	14306471	790605	0.775837	0.21829
2007	217	SC Firm 217	5	SK	1	MAN	2000	IND	1	0.311445	0.101076	0	0	0.298172	3.08128	13.634	0.327214	0.0137747	5.46341	0.0146608	0.00457142	0.0192322	0.0192322	0.311445	0.101076	60.2757	2060496	231685	0.688555	0.312517
2008	217	SC Firm 217	5	SK	1	MAN	2000	IND	1	0.283187	0.0746851	0	0	0.266386	3.79175	13.359	0.26758	0.0121973	2.82921	-0.0908779	-0.0421719	-0.13305	-0.13305	0.283187	0.0746851	42.9458	2173106	175398	0.716813	0.283884
2009	217	SC Firm 217	5	SK	1	MAN	2000	IND	1	0.255017	0.130566	0	0	0.206639	1.95317	13.4099	0.263281	0.0338145	0.707518	0.0102256	0.0132767	0.0235022	0.0235022	0.255017	0.130566	41.5952	1216759	182725	0.744983	0.255792
2010	217	SC Firm 217	5	SK	1	MAN	2000	IND	1	0.275737	0.123685	0	0	0.220003	2.22935	13.5941	0.305649	0.010305	6.49679	0.0558794	-0.0426046	0.0132748	0.0132748	0.275737	0.123685	49.5312	1623662	229167	0.724263	0.28493
2011	217	SC Firm 217	5	SK	1	MAN	2000	IND	1	0.298544	0.134692	0	0	0.223312	2.21649	13.6942	0.314942	0.00149958	3.6817	0.0475421	-0.00371039	0.0438318	0.0438318	0.298544	0.134692	50.0649	1751099	272573	0.701456	0.303613
2012	217	SC Firm 217	5	SK	1	MAN	2000	IND	1	0.28454	0.120905	0	0	0.201363	2.35342	13.8463	0.3644	0.0236896	2.29238	0.0164315	0.000583567	0.017015	0.017015	0.28454	0.120905	65.5022	2103331	289278	0.71546	0.28454
2013	217	SC Firm 217	5	SK	1	MAN	2000	IND	1	0.285483	0.118201	0	0	0.20288	2.41524	14.0094	0.382945	0.00872742	2.89622	0.0216721	0.00624658	0.0279187	0.0279187	0.285483	0.118201	71.272	2335357	313042	0.714517	0.290326
2010	218	SC Firm 218	5	SK	1	MAN	2000	IND	1	0.196104	0.181733	0.0532025	0.0486698	0.0777403	1.07908	15.3357	0.217688	0.00418316	6.49679	-0.054843	0.130944	0.0761014	0.0761014	0.196104	0.181733	148.594	6251781	1.38849e+06	0.803896	0.192098
2011	218	SC Firm 218	5	SK	1	MAN	2000	IND	1	0.235401	0.250162	0.104563	0.112325	0.064035	0.940994	15.3629	0.214274	0.012385	3.6817	0.0467665	-0.0209628	0.0258037	0.0258037	0.235401	0.250162	115.435	5193683	1.73273e+06	0.764599	0.19325
2012	218	SC Firm 218	5	SK	1	MAN	2000	IND	1	0.250416	0.305631	0.121836	0.154545	0.0586475	0.819339	15.5071	0.180917	0.00300968	2.29238	0.0813208	0.0468303	0.128151	0.128151	0.250416	0.305631	141.5	5829795	2.56603e+06	0.749584	0.219256
2013	218	SC Firm 218	5	SK	1	MAN	2000	IND	1	0.239006	0.270243	0.128477	0.148079	0.0402543	0.884411	14.9993	0.169383	0.0128865	2.89622	-0.0161218	-0.0134841	-0.0296059	-0.0296059	0.239006	0.270243	154.359	6491362	2.40388e+06	0.760994	0.188848
2014	218	SC Firm 218	5	SK	1	MAN	2000	IND	1	0.209325	0.29109	0.123428	0.179247	0.0377318	0.751684	15.4267	0.208214	0.003894	3.31015	0.0448022	0.29075	0.335553	0.335553	0.209325	0.29109	106.14	7448517	3.05849e+06	0.790675	0.163089
2009	219	SC Firm 219	5	SK	1	MAN	9000	TECH	1	0.254802	0.0647955	0.120462	0.0270031	0.102647	3.9324	12.8893	0.286265	0.119254	0.707518	0.112651	0.410394	0.523045	0.523045	0.254802	0.0647955	39.7942	1942301	134572	0.745198	0.152739
2010	219	SC Firm 219	5	SK	1	MAN	9000	TECH	1	0.268647	0.08892	0.143775	0.0427097	0.169878	3.02122	13.5266	0.201873	0.0568092	6.49679	0.0870799	0.0420982	0.129178	0.129178	0.268647	0.08892	35.9544	2040124	199113	0.731353	0.146771
2011	219	SC Firm 219	5	SK	1	MAN	9000	TECH	1	0.304682	0.173218	0.232466	0.126493	0.0665443	1.75895	13.3804	0.241057	0.0788989	3.6817	0.0412897	-0.011853	0.0294367	0.0294367	0.304682	0.173218	18.1582	1099360	230326	0.695318	0.0967071
2006	220	SC Firm 220	5	SK	0	SERV	4000	HCARE	1	0.255949	0.14065	0.108342	0.0546527	0.0891085	1.81975	13.027	0.366297	0.00714008	5.17613	-0.0156487	0.0342167	0.018568	0.018568	0.255949	0.14065	150.066	1583816	259225	0.744051	0.195333
2007	220	SC Firm 220	5	SK	0	SERV	4000	HCARE	1	0.213562	0.105196	0.0640106	0.0287554	0.0935211	2.03014	13.1753	0.34167	0.00112346	5.46341	-0.029678	-0.00106963	-0.0307476	-0.0307476	0.213562	0.105196	178.485	1935958	227596	0.786438	0.187635
2008	220	SC Firm 220	5	SK	0	SERV	4000	HCARE	1	0.145294	0.0506334	0.0140134	0.00443927	0.101919	2.86954	13.0905	0.325544	0.00567959	2.82921	-0.13118	-0.0980273	-0.229207	-0.229207	0.145294	0.0506334	151.141	2242625	119608	0.854706	0.157547
2009	220	SC Firm 220	5	SK	0	SERV	4000	HCARE	1	0.125657	0.0876758	0.0115167	0.00773062	0.0984725	1.4332	13.2282	0.274664	0.00266995	0.707518	0.00300781	0.00975632	0.0127641	0.0127641	0.125657	0.0876758	138.466	1275119	122541	0.874343	0.137052
2010	220	SC Firm 220	5	SK	0	SERV	4000	HCARE	1	0.128187	0.0874563	0.00803952	0.00525489	0.0895414	1.46573	13.2916	0.154924	0.00185295	6.49679	0.0215739	-0.00192075	0.0196532	0.0196532	0.128187	0.0874563	146.151	1537367	147338	0.871813	0.141443
2011	220	SC Firm 220	5	SK	0	SERV	4000	HCARE	1	0.126935	0.105831	0.00786948	0.00641569	0.0529257	1.1994	13.2816	0.148318	0.0235788	3.6817	-0.00296079	-0.0495734	-0.0525342	-0.0525342	0.126935	0.105831	104.997	1216484	143980	0.873065	0.143252
2012	220	SC Firm 220	5	SK	0	SERV	4000	HCARE	1	0.12954	0.0970005	0.00658842	0.00476443	0.0363366	1.33545	13.5012	0.132048	0.0109382	2.29238	0.0204337	0.0177477	0.0381814	0.0381814	0.12954	0.0970005	154.396	1591361	170945	0.87046	0.147366
2013	220	SC Firm 220	5	SK	0	SERV	4000	HCARE	1	0.169424	0.121194	0.0397842	0.0272481	0.0526294	1.39796	13.7092	0.148681	0.0114458	2.89622	0.0509235	0.183746	0.234669	0.234669	0.169424	0.121194	169.695	1772235	244405	0.830576	0.154312
2014	220	SC Firm 220	5	SK	0	SERV	4000	HCARE	1	0.195134	0.152725	0.0512094	0.0385805	0.0617927	1.27769	13.744	0.146266	0.00366986	3.31015	0.0298403	-0.0231187	0.00672151	0.00672151	0.195134	0.152725	147.707	1600670	288527	0.804866	0.167025
2011	221	SC Firm 221	5	SK	1	MAN	3000	CGOODS	1	0.0846403	0.0244462	0	0	0.0603056	2.97312	11.3336	0.0336626	0.0023582	3.6817	0.0108331	0.0394062	0.0502393	0.0502393	0.0846403	0.0244462	16.8661	188597	4531.1	0.91536	0.0775952
2012	221	SC Firm 221	5	SK	1	MAN	3000	CGOODS	1	0.0923642	0.0244462	0	0	0.178207	4.522	11.3336	0.040514	0.0836678	2.29238	0.0443913	0.0335798	0.0779711	0.0779711	0.0923642	0.0244462	40.2956	418385	8723.91	0.907636	0.0923642
2013	221	SC Firm 221	5	SK	1	MAN	3000	CGOODS	1	0.0881787	0.0420972	0	0	0.0816019	2.09465	11.3336	0.0284502	0.0668695	2.89622	0.0107673	-0.0206351	-0.00986777	-0.00986777	0.0881787	0.0420972	21.173	226120	9937.34	0.911821	0.0881787
2014	221	SC Firm 221	5	SK	1	MAN	3000	CGOODS	1	0.134446	0.0244462	0	0	0.397801	5.57217	12.2772	0.0116052	0.129833	3.31015	0.0909502	0.11107	0.20202	0.20202	0.134446	0.0244462	109.622	1242330	30716.3	0.865554	0.156643
2011	222	SC Firm 222	6	TW	1	MAN	2000	IND	1	0.313708	0.117035	0.241846	0.0846676	0.17159	2.68046	11.3676	0.285768	0.0187907		-0.0102891	-0.000850711	-0.0111398	-0.0111398	0.313708	0.117035	4.75719	457477	60637.7	0.686292	0.103156
2012	222	SC Firm 222	6	TW	1	MAN	2000	IND	1	0.26246	0.0916352	0.172596	0.0558325	0.233892	2.86418	11.725	0.260484	0.0433759		-0.0157354	0.0110243	-0.00471112	-0.00471112	0.26246	0.0916352	6.34045	567092	57207.8	0.73754	0.116048
2013	222	SC Firm 222	6	TW	1	MAN	2000	IND	1	0.175299	0.0376481	0.0671324	0.0130715	0.228259	4.65625	11.7476	0.21871	0.00255669		-0.0614604	0.0568586	-0.00460184	-0.00460184	0.175299	0.0376481	11.2695	1082726	42357.2	0.824701	0.122972
2014	222	SC Firm 222	6	TW	1	MAN	2000	IND	1	0.157347	0.0317446	0.0470447	0.00859329	0.230455	4.95666	11.8162	0.181018	0.00433615		-0.00183998	-0.00624024	-0.00808022	-0.00808022	0.157347	0.0317446	12.84	1277022	41867.6	0.842653	0.125439
2004	223	SC Firm 223	6	TW	1	MAN	3000	CGOODS	1	0.099193	0.0294769	0.010295	0.00286089	0.229388	3.36511	11.3522	0.427361	0.0339182		-0.0492583	0.0368053	-0.012453	-0.012453	0.099193	0.0294769	4.76636	570997	17342.4	0.900807	0.106994
2005	223	SC Firm 223	6	TW	1	MAN	3000	CGOODS	1	0.174284	0.0244462	0.034935	0.00358593	0.280555	7.29543	11.7192	0.447027	0.0372378		0.0973637	-0.00952909	0.0878346	0.0878346	0.174284	0.0244462	14.1904	1872595	39294.1	0.825716	0.14491
2006	223	SC Firm 223	6	TW	1	MAN	3000	CGOODS	1	0.113079	0.0244462	0.0280281	0.00338183	0.397801	7.29543	12.3253	0.389167	0.119533		-0.0108352	0.0178341	0.00699886	0.00699886	0.113079	0.0244462	18.2217	2390047	35858.2	0.886921	0.0883452
2007	223	SC Firm 223	6	TW	1	MAN	3000	CGOODS	1	0.0925783	0.0244462	0.0023947	0.000457611	0.309818	4.85038	12.1087	0.376485	0.0997506		-0.0114789	0.00622087	-0.00525801	-0.00525801	0.0925783	0.0244462	12.7484	1639543	31902.6	0.907422	0.0919261
2008	223	SC Firm 223	6	TW	1	MAN	3000	CGOODS	1	0.123165	0.058862	0.00919917	0.004117	0.271427	2.09244	12.3385	0.370692	0.0215411		0.0465548	-0.00194036	0.0446144	0.0446144	0.123165	0.058862	6.09097	820058	51289.2	0.876835	0.117171
2009	223	SC Firm 223	6	TW	1	MAN	3000	CGOODS	1	0.125589	0.0353287	0.00120181	0.000306715	0.213346	3.55488	12.4493	0.350282	0.0398448		0.0209808	0.041276	0.0622567	0.0622567	0.125589	0.0353287	13.1686	1681369	61576	0.874411	0.124537
2010	223	SC Firm 223	6	TW	1	MAN	3000	CGOODS	1	0.137415	0.0285613	0.00678082	0.00125841	0.284143	4.81123	12.9563	0.307029	0.0507014		0.0428778	0.0129382	0.0558161	0.0558161	0.137415	0.0285613	24.8586	3044249	89504.1	0.862585	0.131526
2011	223	SC Firm 223	6	TW	1	MAN	3000	CGOODS	1	0.206345	0.0609025	0.0219699	0.00557199	0.255916	3.38813	13.1769	0.325412	0.0181031		0.097533	-0.00337309	0.0941599	0.0941599	0.206345	0.0609025	18.6984	2617188	169730	0.793655	0.188517
2012	223	SC Firm 223	6	TW	1	MAN	3000	CGOODS	1	0.261744	0.0746673	0.00402774	0.000919555	0.256681	3.50547	13.446	0.31344	0.00130328		0.103716	0.00326604	0.106982	0.106982	0.261744	0.0746673	26.8091	3483928	281126	0.738256	0.259341
2013	223	SC Firm 223	6	TW	1	MAN	3000	CGOODS	1	0.211297	0.0472546	0.00270421	0.000501747	0.316698	4.47147	13.7323	0.273722	0.0433235		-0.00577112	0.000389018	-0.0053821	-0.0053821	0.211297	0.0472546	40.7513	5517370	273652	0.788703	0.209404
2014	223	SC Firm 223	6	TW	1	MAN	3000	CGOODS	1	0.243148	0.0423983	0.00409833	0.000566822	0.372263	5.73487	14.1862	0.238029	0.0465641		0.101422	-0.000781754	0.100641	0.100641	0.243148	0.0423983	75.7432	10603701	469484	0.756852	0.240203
2004	224	SC Firm 224	6	TW	1	MAN	9000	TECH	1	0.108155	0.0318561	0.000249549	6.77222e-05	0.312735	3.39511	14.0604	0.0443925	0.0351205		-0.0101768	0.0223203	0.0121434	0.0121434	0.108155	0.0318561	5.28221	4951046	162911	0.891845	0.107932
2005	224	SC Firm 224	6	TW	1	MAN	9000	TECH	1	0.224663	0.0426456	0.0171743	0.00267915	0.279159	5.26814	14.2929	0.0814223	0.0301389		0.14621	0.0169075	0.163118	0.163118	0.224663	0.0426456	10.0862	10472998	466522	0.775337	0.211115
2006	224	SC Firm 224	6	TW	1	MAN	9000	TECH	1	0.120124	0.027183	0.000215961	4.42087e-05	0.320539	4.41907	14.3642	0.0658749	0.0272395		-0.0779275	0.0497519	-0.0281756	-0.0281756	0.120124	0.027183	9.71477	10126462	282959	0.879876	0.119933
2007	224	SC Firm 224	6	TW	1	MAN	9000	TECH	1	0.130777	0.0293444	0.000998292	0.000200754	0.342887	4.45662	14.7271	0.0598942	0.0154988		0.0379901	0.0114574	0.0494475	0.0494475	0.130777	0.0293444	12.806	13191902	398812	0.869223	0.129908
2008	224	SC Firm 224	6	TW	1	MAN	9000	TECH	1	0.176267	0.0682854	5.32744e-05	1.82472e-05	0.245835	2.58132	14.8307	0.0656478	0.0770775		0.0444153	-0.00281406	0.0416013	0.0416013	0.176267	0.0682854	6.70495	7274591	533155	0.823733	0.176223
2009	224	SC Firm 224	6	TW	1	MAN	9000	TECH	1	0.213314	0.0489124	0	0	0.28596	4.36114	15.1001	0.0497054	0.0353317		0.0903284	0.0438249	0.134153	0.134153	0.213314	0.0489124	17.419	17981259	924738	0.786686	0.214468
2010	224	SC Firm 224	6	TW	1	MAN	9000	TECH	1	0.187595	0.0585629	0	0	0.246723	3.20331	15.1745	0.0565642	0.0264427		-0.00779014	0.0157488	0.00795868	0.00795868	0.187595	0.0585629	14.3151	14273061	887868	0.812405	0.190688
2011	224	SC Firm 224	6	TW	1	MAN	9000	TECH	1	0.210677	0.08619	0.034021	0.0122926	0.102027	2.44434	14.8696	0.0667459	0.100124		0.0287719	0.0955998	0.124372	0.124372	0.210677	0.08619	9.16749	10902335	1.0283e+06	0.789323	0.186908
2012	224	SC Firm 224	6	TW	1	MAN	9000	TECH	1	0.160584	0.0743239	0.0480227	0.0207332	0.0765149	2.1606	15.0444	0.0510084	0.0173999		0.0186346	0.267184	0.285819	0.285819	0.160584	0.0743239	11.1475	14488394	1.16329e+06	0.839416	0.123919
2013	224	SC Firm 224	6	TW	1	MAN	9000	TECH	1	0.240768	0.0939447	0.128995	0.0461857	0.10428	2.56287	15.3336	0.0437374	0.0273341		0.106667	-0.0363998	0.0702669	0.0702669	0.240768	0.0939447	14.8751	20143600	2.0886e+06	0.759232	0.132387
2014	224	SC Firm 224	6	TW	1	MAN	9000	TECH	1	0.294262	0.120524	0.15714	0.0577383	0.142422	2.44151	15.7233	0.0663438	0.0261221		0.106173	0.0680785	0.174252	0.174252	0.294262	0.120524	14.611	23843770	3.26758e+06	0.705738	0.16448
2011	225	SC Firm 225	6	TW	1	MAN	9000	TECH	1	0.308886	0.124042	0.0273047	0.00881557	0.182029	2.49018	13.8818	0.0804608	0.0187154		-0.00934611	-0.00768093	-0.017027	-0.017027	0.308886	0.124042	6.02907	1124542	159243	0.691114	0.289485
2012	225	SC Firm 225	6	TW	1	MAN	9000	TECH	1	0.292058	0.13102	0.0208233	0.00771225	0.189373	2.22911	13.9459	0.0797736	0.004264		0.0256321	0.0163082	0.0419403	0.0419403	0.292058	0.13102	6.63336	1157776	174563	0.707942	0.277003
2013	225	SC Firm 225	6	TW	1	MAN	9000	TECH	1	0.294692	0.144447	0.00633632	0.00257011	0.179255	2.04014	13.8917	0.0799739	0.00734045		0.0329025	-0.00660876	0.0262937	0.0262937	0.294692	0.144447	6.3894	1163876	196503	0.705308	0.290198
2014	225	SC Firm 225	6	TW	1	MAN	9000	TECH	1	0.275475	0.129084	0	0	0.147117	2.13407	13.8605	0.0716407	0.0227928		0.00305858	0.0390654	0.042124	0.042124	0.275475	0.129084	6.926	1340665	198709	0.724525	0.275821
2006	226	SC Firm 226	6	TW	1	MAN	9000	TECH	1	0.203252	0.0973968	0.0902918	0.040292	0.240473	2.08685	14.3771	0.428524	0.0332917		-0.128498	0.207323	0.0788246	0.0788246	0.203252	0.0973968	1.52585	4566840	492792	0.796748	0.124172
2007	226	SC Firm 226	6	TW	1	MAN	9000	TECH	1	0.196623	0.0883029	0.0486782	0.0198477	0.277456	2.22668	14.5291	0.450285	0.0239127		0.0103601	0.00665726	0.0170173	0.0170173	0.196623	0.0883029	1.78047	5370901	520201	0.803377	0.155515
2008	226	SC Firm 226	6	TW	1	MAN	9000	TECH	1	0.191688	0.137133	0.0580145	0.0396379	0.242459	1.39782	14.4601	0.529293	0.0472946		-0.0405166	-0.00720943	-0.0477261	-0.0477261	0.191688	0.137133	0.854831	2702075	429433	0.808312	0.141906
2009	226	SC Firm 226	6	TW	1	MAN	9000	TECH	1	0.194474	0.105894	0.00356183	0.0017505	0.211868	1.8365	14.4332	0.463745	0.0126824		0.0191594	0.0229448	0.0421043	0.0421043	0.194474	0.105894	1.35596	4022154	476364	0.805526	0.191594
2010	226	SC Firm 226	6	TW	1	MAN	9000	TECH	1	0.25753	0.175945	0.0868437	0.0553041	0.179943	1.46369	14.5992	0.519965	0.0189147		0.0892441	0.0590727	0.148317	0.148317	0.25753	0.175945	1.20007	3414280	728986	0.74247	0.186919
2011	226	SC Firm 226	6	TW	1	MAN	9000	TECH	1	0.304957	0.227526	0.158979	0.112608	0.168619	1.34032	14.5201	0.5256	0.0118023		0.0424936	-0.208	-0.165507	-0.165507	0.304957	0.227526	0.895276	2875693	847012	0.695043	0.173759
2010	227	SC Firm 227	6	TW	1	MAN	3000	CGOODS	1	0.320262	0.117093	0.064897	0.019161	0.267691	2.7351	13.3324	0.225799	0.0355545		-0.0124209	0.0623631	0.0499422	0.0499422	0.320262	0.117093	1.09556	873643	115865	0.679738	0.273087
2011	227	SC Firm 227	6	TW	1	MAN	3000	CGOODS	1	0.292416	0.0766094	0.0530826	0.0111289	0.239709	3.81697	13.3924	0.174449	0.0184995		0.012636	0.0790903	0.0917263	0.0917263	0.292416	0.0766094	1.60145	1459618	121098	0.707584	0.258043
2012	227	SC Firm 227	6	TW	1	MAN	3000	CGOODS	1	0.286138	0.0825332	0.0622312	0.0146747	0.190099	3.46694	13.3289	0.161482	0.0348095		0.0318287	0.0869114	0.11874	0.11874	0.286138	0.0825332	1.7899	1514645	136254	0.713862	0.242018
2013	227	SC Firm 227	6	TW	1	MAN	3000	CGOODS	1	0.321521	0.076634	0.108496	0.0208691	0.140226	4.19555	13.435	0.208769	0.0342078		0.0660625	0.0589386	0.125001	0.125001	0.321521	0.076634	2.34372	2066288	171490	0.678479	0.24421
2005	228	SC Firm 228	6	TW	1	MAN	1000	BMAT	1	0.148886	0.185014	0.00562917	0.00729295	0.0129809	0.804731	12.6684	0.635428	0.000365953		-0.206907	0.266449	0.0595419	0.0595419	0.148886	0.185014	1.16758	1130168	256565	0.851114	0.150569
2006	228	SC Firm 228	6	TW	1	MAN	1000	BMAT	1	0.188858	0.165845	0.00398253	0.00340275	0.0101345	1.13876	12.748	0.490636	0.00158678		0.0553087	0.0253075	0.0806163	0.0806163	0.188858	0.165845	1.91222	1824883	362820	0.811142	0.196549
2007	228	SC Firm 228	6	TW	1	MAN	1000	BMAT	1	0.178233	0.130284	0	0	0.00723807	1.36803	12.8051	0.475074	0.000179613		-0.00422809	0.02706	0.022832	0.022832	0.178233	0.130284	2.45527	2365885	354413	0.821767	0.191487
2008	228	SC Firm 228	6	TW	1	MAN	1000	BMAT	1	0.197166	0.194052	6.27035e-05	6.14749e-05	0.00700921	1.01605	13.1612	0.426613	0.000179613		0.0139593	-0.0197443	-0.00578497	-0.00578497	0.197166	0.194052	1.59365	1584121	381417	0.802834	0.220496
2009	228	SC Firm 228	6	TW	1	MAN	1000	BMAT	1	0.180407	0.0953268	7.60767e-05	3.64197e-05	0.03167	1.89251	13.1931	0.459347	0.0170492		-0.0159186	0.025476	0.00955739	0.00955739	0.180407	0.0953268	3.56584	3326235	350491	0.819593	0.192636
2010	228	SC Firm 228	6	TW	1	MAN	1000	BMAT	1	0.206952	0.118701	7.69404e-05	3.9713e-05	0.0169977	1.74347	13.1123	0.498181	0.010748		0.0458955	0.0468181	0.0927136	0.0927136	0.206952	0.118701	3.73736	3343766	450368	0.793048	0.215703
2011	228	SC Firm 228	6	TW	1	MAN	1000	BMAT	1	0.14565	0.1173	6.89156e-05	5.37201e-05	0.0103547	1.24168	13.2373	0.556891	0.00460972		-0.0616107	-0.208	-0.269611	-0.269611	0.14565	0.1173	2.32904	2381633	316491	0.85435	0.253885
2012	228	SC Firm 228	6	TW	1	MAN	1000	BMAT	1	0.134634	0.110473	0	0	0.0340869	1.2187	13.3806	0.575784	0.0165762		-0.00371974	0.00209258	-0.00162716	-0.00162716	0.134634	0.110473	2.61199	2479853	307982	0.865366	0.235806
2013	228	SC Firm 228	6	TW	1	MAN	1000	BMAT	1	0.136153	0.11946	0.00285512	0.00245856	0.0164063	1.13974	13.1942	0.577347	0.0130295		-0.00186955	-0.00629652	-0.00816607	-0.00816607	0.136153	0.11946	2.26396	2239375	303810	0.863847	0.23433
2014	228	SC Firm 228	6	TW	1	MAN	1000	BMAT	1	0.155372	0.16102	0.0424549	0.044213	0.0321258	0.964925	13.2245	0.47624	0.00827265		0.0191044	-0.00230561	0.0167988	0.0167988	0.155372	0.16102	1.76471	1804901	346403	0.844628	0.219362
2004	229	SC Firm 229	6	TW	1	MAN	2000	IND	1	0.316442	0.185126	0.138223	0.0729685	0.246235	1.70934	12.2949	0.321068	0.000540234		0.0193844	0.0300115	0.049396	0.049396	0.316442	0.185126	1.17207	499308	113435	0.683558	0.206805
2005	229	SC Firm 229	6	TW	1	MAN	2000	IND	1	0.287972	0.126726	0.043912	0.0162124	0.220118	2.2724	12.4333	0.357366	0.0207933		-0.0331255	0.00376384	-0.0293616	-0.0293616	0.287972	0.126726	1.5037	701040	101732	0.712028	0.25527
2006	229	SC Firm 229	6	TW	1	MAN	2000	IND	1	0.29441	0.121396	0.054132	0.0185987	0.211666	2.4252	12.5231	0.341924	0.00394502		0.0296348	0.00843593	0.0380708	0.0380708	0.29441	0.121396	1.78114	818697	113119	0.70559	0.254312
2004	230	SC Firm 230	6	TW	1	MAN	9000	TECH	1	0.201197	0.0825361	0.0975933	0.0371904	0.316942	2.43769	15.9078	0.518546	0.0362286		0.0547579	0.0876576	0.142416	0.142416	0.201197	0.0825361	1.44926	35192962	3.166e+06	0.798803	0.114809
2005	230	SC Firm 230	6	TW	1	MAN	9000	TECH	1	0.14221	0.0442706	0.0649976	0.019053	0.320871	3.21228	15.9119	0.471258	0.00145105		-0.0574366	0.0162801	-0.0411565	-0.0411565	0.14221	0.0442706	1.82468	48685325	2.25517e+06	0.85779	0.0825794
2006	230	SC Firm 230	6	TW	1	MAN	9000	TECH	1	0.135329	0.0428979	0.0555684	0.0165706	0.342072	3.15468	16.092	0.432512	0.0293602		0.0102651	0.0164455	0.0267106	0.0267106	0.135329	0.0428979	2.04097	54445242	2.44027e+06	0.864671	0.0844538
2007	230	SC Firm 230	6	TW	1	MAN	9000	TECH	1	0.146749	0.0509581	0.0484749	0.0156557	0.335782	2.8798	16.1132	0.455891	0.0147926		0.00816373	-0.0720018	-0.063838	-0.063838	0.146749	0.0509581	1.89334	48124647	2.58402e+06	0.853251	0.10328
2008	230	SC Firm 230	6	TW	1	MAN	9000	TECH	1	0.147678	0.0667479	0.0489116	0.0207872	0.332211	2.21247	16.1351	0.435924	0.00652633		-0.00375725	0.0632026	0.0594454	0.0594454	0.147678	0.0667479	1.34877	35232646	2.5199e+06	0.852322	0.103845
2009	230	SC Firm 230	6	TW	1	MAN	9000	TECH	1	0.167503	0.0589471	0.0243147	0.0076986	0.290492	2.84158	16.0402	0.460193	0.0225142		0.0320368	0.0239078	0.0559446	0.0559446	0.167503	0.0589471	2.01752	49742421	3.11584e+06	0.832497	0.146757
2010	230	SC Firm 230	6	TW	1	MAN	9000	TECH	1	0.201388	0.0793661	0.0704666	0.0252613	0.343515	2.53746	16.4817	0.540309	0.0472128		0.0749871	0.0314983	0.106485	0.106485	0.201388	0.0793661	2.43442	57585130	4.96431e+06	0.798612	0.140847
2011	230	SC Firm 230	6	TW	1	MAN	9000	TECH	1	0.19506	0.0690591	0.0750952	0.024252	0.319574	2.82453	16.4623	0.629109	0.028244		0.00229526	-0.0167032	-0.0144079	-0.0144079	0.19506	0.0690591	2.50413	67717434	5.02342e+06	0.80494	0.129705
2012	230	SC Firm 230	6	TW	1	MAN	9000	TECH	1	0.250484	0.089883	0.139642	0.0457691	0.325552	2.78678	16.6747	0.642388	0.0052747		0.0987135	0.0182416	0.116955	0.116955	0.250484	0.089883	3.34252	83948259	8.29072e+06	0.749516	0.128832
2013	230	SC Firm 230	6	TW	1	MAN	9000	TECH	1	0.3284	0.130602	0.211315	0.0760522	0.289448	2.51451	16.8125	0.627623	0.0163606		0.13268	0.00704762	0.139728	0.139728	0.3284	0.130602	3.53849	92603781	1.39111e+07	0.6716	0.148457
2014	230	SC Firm 230	6	TW	1	MAN	9000	TECH	1	0.300089	0.10521	0.193261	0.0616461	0.332499	2.85229	16.9987	0.547272	0.0231723		0.005873	-0.00536186	0.000511132	0.000511132	0.300089	0.10521	4.4592	120672684	1.41887e+07	0.699911	0.132553
2007	231	SC Firm 231	6	TW	1	MAN	9000	TECH	1	0.254555	0.109257	0.0928446	0.0354591	0.166547	2.32987	13.9709	0.152151	0.0239534		0.009227	0.204141	0.213368	0.213368	0.254555	0.109257	2.8563	1146605	140641	0.745445	0.178949
2008	231	SC Firm 231	6	TW	1	MAN	9000	TECH	1	0.214268	0.140467	0.0867168	0.0538384	0.103462	1.5254	13.8647	0.1809	0.0469454		-0.0352006	0.021431	-0.0137696	-0.0137696	0.214268	0.140467	1.76001	739165	120796	0.785732	0.144519
2009	231	SC Firm 231	6	TW	1	MAN	9000	TECH	1	0.136201	0.0562281	0.0242933	0.00932006	0.261889	2.4223	13.8893	0.166212	0.112432		-0.0461558	0.0461291	-2.67014e-05	-2.67014e-05	0.136201	0.0562281	3.75352	1514349	90221.9	0.863799	0.122565
2010	231	SC Firm 231	6	TW	1	MAN	9000	TECH	1	0.116355	0.0687934	0.0202918	0.0114868	0.124111	1.69136	13.9141	0.197341	0.0978119		-0.0186998	0.0414308	0.0227311	0.0227311	0.116355	0.0687934	2.70873	1052171	77729.7	0.883645	0.109093
2011	231	SC Firm 231	6	TW	1	MAN	9000	TECH	1	0.130728	0.0746886	0	0	0.159297	1.7503	13.8138	0.168706	0.0248791		0.0236827	-0.000396041	0.0232867	0.0232867	0.130728	0.0746886	2.61645	1176039	94926.7	0.869272	0.144598
2012	231	SC Firm 231	6	TW	1	MAN	9000	TECH	1	0.180157	0.113284	0.00849966	0.00495925	0.152518	1.5903	13.713	0.145154	0.00485347		0.0649511	0.012733	0.077684	0.077684	0.180157	0.113284	2.78429	1161928	148445	0.819843	0.186767
2013	231	SC Firm 231	6	TW	1	MAN	9000	TECH	1	0.166145	0.0975743	0.0278401	0.0153025	0.147721	1.70276	13.6833	0.137364	0.00332402		-0.0163764	-0.0112814	-0.0276578	-0.0276578	0.166145	0.0975743	2.87439	1249726	135126	0.833855	0.158578
2014	231	SC Firm 231	6	TW	1	MAN	9000	TECH	1	0.193558	0.102894	0.0408598	0.0199513	0.151217	1.88114	13.6657	0.12022	0.00304182		0.0310565	-0.0167572	0.0142993	0.0142993	0.193558	0.102894	3.12144	1403289	160951	0.806442	0.177663
2004	232	SC Firm 232	6	TW	1	MAN	9000	TECH	1	0.292133	0.242744	0.214467	0.174963	0.179826	1.20346	15.2192	0.510289	0.0208871		-0.0118446	0.0844884	0.0726438	0.0726438	0.292133	0.242744	0.670181	10804549	3.46348e+06	0.707867	0.0988702
2005	232	SC Firm 232	6	TW	1	MAN	9000	TECH	1	0.255623	0.196687	0.183799	0.138345	0.136241	1.29965	14.9346	0.458476	0.0522056		-0.0713153	0.00170829	-0.069607	-0.069607	0.255623	0.196687	0.649756	11060057	2.70799e+06	0.744377	0.0881477
2006	232	SC Firm 232	6	TW	1	MAN	9000	TECH	1	0.207902	0.162251	0.12283	0.0936501	0.136355	1.28137	15.0503	0.412965	0.0225969		-0.0320693	0.0705345	0.0384652	0.0384652	0.207902	0.162251	0.718579	12113644	2.3461e+06	0.792098	0.0971279
2007	232	SC Firm 232	6	TW	1	MAN	9000	TECH	1	0.210456	0.202782	0.116159	0.111439	0.149817	1.03784	15.0669	0.45807	0.00573852		-0.0434532	-0.16791	-0.211363	-0.211363	0.210456	0.202782	0.594766	7644983	1.9446e+06	0.789544	0.106848
2008	232	SC Firm 232	6	TW	1	MAN	9000	TECH	1	0.146529	0.244914	0.0433193	0.0788038	0.167832	0.751684	14.8992	0.500974	0.0204284		-0.147813	-0.0704899	-0.218303	-0.218303	0.146529	0.244914	0.226836	2984590	968058	0.853471	0.107946
2006	233	SC Firm 233	6	TW	1	MAN	9000	TECH	1	0.117831	0.0652439	0.00242073	0.00126644	0.246135	1.80601	12.8947	0.207638	0.0317182		-0.067475	0.0490556	-0.0184194	-0.0184194	0.117831	0.0652439	0.739373	1261836	88073.3	0.882169	0.11569
2007	233	SC Firm 233	6	TW	1	MAN	9000	TECH	1	0.140266	0.0855664	3.51873e-05	2.01816e-05	0.257362	1.63927	13.1076	0.512256	0.0270596		0.0349225	0.0112653	0.0461878	0.0461878	0.140266	0.0855664	0.745775	1253249	117270	0.859734	0.140236
2008	233	SC Firm 233	6	TW	1	MAN	9000	TECH	1	0.125739	0.186908	0.000498959	0.000797246	0.182532	0.751684	13.1065	0.634947	0.0997895		-0.0400153	-0.0348672	-0.0748824	-0.0748824	0.125739	0.186908	0.227446	386996	88959.9	0.874261	0.125303
2005	234	SC Firm 234	6	TW	1	MAN	3000	CGOODS	1	0.216992	0.0946884	0	0	0.173775	2.29164	14.2161	0.00747944	0.00538115		-0.0316436	0.00498165	-0.0266619	-0.0266619	0.216992	0.0946884	3.73932	1159123	121235	0.783008	0.262308
2006	234	SC Firm 234	6	TW	1	MAN	3000	CGOODS	1	0.173716	0.0940036	0	0	0.0633435	1.84797	13.7288	0.00747944	0.07836		-0.059203	0.0122319	-0.0469711	-0.0469711	0.173716	0.0940036	2.85144	871455	90419.7	0.826284	0.219652
2007	234	SC Firm 234	6	TW	1	MAN	3000	CGOODS	1	0.166348	0.163697	0	0	0.034117	1.01619	13.6436	0.00747944	0.0208548		0.00330709	0.0300084	0.0333155	0.0333155	0.166348	0.163697	1.59778	471309	92253.7	0.833652	0.206377
2008	234	SC Firm 234	6	TW	1	MAN	3000	CGOODS	1	0.0946858	0.195524	0	0	-0.0340192	0.751684	13.2939	0.00747944	0.0485913		-0.0780256	0.0461396	-0.031886	-0.031886	0.0946858	0.195524	0.683865	208095	50576.4	0.905314	0.137758
2009	234	SC Firm 234	6	TW	1	MAN	3000	CGOODS	1	0.100665	0.0754988	0	0	-0.0340192	1.33333	13.4269	0.00747944	0.00671944		0.00942417	-0.0158581	-0.00643388	-0.00643388	0.100665	0.0754988	2.39287	683290	55800.4	0.899335	0.138332
2010	234	SC Firm 234	6	TW	1	MAN	3000	CGOODS	1	0.113131	0.0576963	0	0	0.0251295	1.96081	13.7551	0.00747944	0.0496067		0.0347107	0.0258366	0.0605473	0.0605473	0.113131	0.0576963	4.80027	1314718	80498.9	0.886869	0.17285
2011	234	SC Firm 234	6	TW	1	MAN	3000	CGOODS	1	0.133898	0.0757357	0	0	0.0429203	1.76797	13.8747	0.0590291	0.0126996		0.0356761	0.00505088	0.0407269	0.0407269	0.133898	0.0757357	4.27816	1339216	109738	0.866102	0.213629
2012	234	SC Firm 234	6	TW	1	MAN	3000	CGOODS	1	0.138585	0.0547045	0.0084236	0.00304649	0.0376037	2.53333	13.8186	0.0616684	0.0166394		0.0219626	0.023042	0.0450045	0.0450045	0.138585	0.0547045	7.75327	2253380	130404	0.861415	0.238383
2013	234	SC Firm 234	6	TW	1	MAN	3000	CGOODS	1	0.1926	0.0505444	0.11292	0.0276233	0.0651502	3.81051	13.87	0.0499163	0.0234295		0.0825176	0.0387154	0.121233	0.121233	0.1926	0.0505444	14.1539	4285787	228154	0.8074	0.188241
2014	234	SC Firm 234	6	TW	1	MAN	3000	CGOODS	1	0.192403	0.063117	0.109626	0.0336452	0.0338893	3.04835	13.8636	0.0491437	0.0214748		-0.00521237	-0.0135154	-0.0187278	-0.0187278	0.192403	0.063117	10.5313	3297300	222136	0.807597	0.162876
2005	235	SC Firm 235	6	TW	1	MAN	2000	IND	1	0.314941	0.0607295	0.211493	0.0363511	0.295242	5.18597	12.5869	0.374008	0.0453344		0.0308843	0.183657	0.214541	0.214541	0.314941	0.0607295	3.68102	2371448	153329	0.685059	0.132387
2006	235	SC Firm 235	6	TW	1	MAN	2000	IND	1	0.231483	0.0414265	0.118586	0.0189382	0.299051	5.5878	13.0491	0.383178	0.00622284		0.0323618	0.147832	0.180194	0.180194	0.231483	0.0414265	6.21484	4124504	178248	0.768517	0.128727
2007	235	SC Firm 235	6	TW	1	MAN	2000	IND	1	0.291762	0.0957562	0.20504	0.0621791	0.229637	3.04693	13.232	0.390655	0.0495126		0.13357	0.0537286	0.187299	0.187299	0.291762	0.0957562	4.81796	3104476	328753	0.708238	0.109653
2005	236	SC Firm 236	6	TW	1	MAN	1000	BMAT	1	0.239854	0.117548	0.136487	0.0625526	0.253441	2.04048	11.8057	0.116369	0.0194633		-0.250069	0.0116238	-0.238445	-0.238445	0.239854	0.117548	1.13168	262044	34905.8	0.760146	0.119704
2006	236	SC Firm 236	6	TW	1	MAN	1000	BMAT	1	0.143636	0.0589478	0.00646257	0.00242334	0.290434	2.43667	12.0214	0.119601	0.0209428		-0.0927605	0.0508096	-0.041951	-0.041951	0.143636	0.0589478	1.47274	338584	21209	0.856364	0.138066
2007	236	SC Firm 236	6	TW	1	MAN	1000	BMAT	1	0.162433	0.051427	0.0218562	0.00620771	0.310135	3.15853	12.316	0.12649	0.0152799		0.040116	0.0402702	0.0803863	0.0803863	0.162433	0.051427	2.32073	519502	28164.8	0.837567	0.143718
2008	236	SC Firm 236	6	TW	1	MAN	1000	BMAT	1	0.157046	0.0682325	0.00174801	0.000687803	0.316757	2.30163	12.477	0.187581	0.00466671		-0.0115682	-0.0472117	-0.05878	-0.05878	0.157046	0.0682325	1.53564	358225	26232.5	0.842954	0.15557
2009	236	SC Firm 236	6	TW	1	MAN	1000	BMAT	1	0.128456	0.0383402	0	0	0.252998	3.35041	12.0441	0.191616	0.0458168		-0.0134249	0.0670054	0.0535805	0.0535805	0.128456	0.0383402	2.7213	595713	23750.4	0.871544	0.128456
2010	236	SC Firm 236	6	TW	1	MAN	1000	BMAT	1	0.169119	0.0445808	0.0342065	0.00805401	0.334971	3.79355	12.569	0.252144	0.0554673		0.0695191	0.0376389	0.107158	0.107158	0.169119	0.0445808	4.11452	864269	40327.7	0.830881	0.139691
2011	236	SC Firm 236	6	TW	1	MAN	1000	BMAT	1	0.18427	0.0482554	0.0304257	0.00699407	0.339245	3.81863	12.6094	0.207955	0.00234327		0.02431	-0.0139611	0.0103489	0.0103489	0.18427	0.0482554	3.81566	916264	46456.5	0.81573	0.158672
2012	236	SC Firm 236	6	TW	1	MAN	1000	BMAT	1	0.15613	0.0389601	0.0138568	0.00306941	0.30963	4.00744	12.5648	0.204083	0.0245925		-0.0230136	0.0208782	-0.00213545	-0.00213545	0.15613	0.0389601	4.47967	998741	40488.5	0.84387	0.144527
2013	236	SC Firm 236	6	TW	1	MAN	1000	BMAT	1	0.155194	0.0325923	0.0102221	0.00189046	0.321212	4.76168	12.5975	0.178732	0.00881332		0.0092299	0.0123316	0.0215615	0.0215615	0.155194	0.0325923	5.50059	1277778	43048.7	0.844806	0.146551
2014	236	SC Firm 236	6	TW	1	MAN	1000	BMAT	1	0.142624	0.0321731	0.0133086	0.00268817	0.306603	4.43301	12.5483	0.167615	0.0132684		-0.0140992	0.00903523	-0.00506394	-0.00506394	0.142624	0.0321731	4.90196	1178485	39176	0.857376	0.131251
2004	237	SC Firm 237	6	TW	1	MAN	9000	TECH	1	0.271613	0.0963001	0.115222	0.0358795	0.259692	2.82048	12.9519	0.225855	0.016369		-0.0322364	0.124502	0.0922652	0.0922652	0.271613	0.0963001	1.69009	865489	92228.3	0.728387	0.189032
2005	237	SC Firm 237	6	TW	1	MAN	9000	TECH	1	0.186926	0.0626587	0.0413268	0.0123793	0.177094	2.98323	12.8431	0.161532	0.0523965		-0.00893365	0.25214	0.243206	0.243206	0.186926	0.0626587	2.07582	1316755	88021.5	0.813074	0.156425
2006	237	SC Firm 237	6	TW	1	MAN	9000	TECH	1	0.155357	0.0450037	0.0252843	0.00660215	0.185569	3.4521	13.0198	0.158351	0.00632372		-0.0157263	0.0522102	0.036484	0.036484	0.155357	0.0450037	2.67844	1696154	79930.4	0.844643	0.140866
2007	237	SC Firm 237	6	TW	1	MAN	9000	TECH	1	0.207617	0.0973597	0.0501519	0.0212731	0.175706	2.13248	13.1288	0.18241	0.00937654		0.0637294	-0.0229902	0.0407392	0.0407392	0.207617	0.0973597	1.78524	1069270	115333	0.792383	0.178474
2008	237	SC Firm 237	6	TW	1	MAN	9000	TECH	1	0.233923	0.130105	0.0563677	0.0284269	0.200389	1.79796	13.1805	0.280312	0.0129963		-0.0129033	-0.150782	-0.163685	-0.163685	0.233923	0.130105	1.19252	730814	109303	0.766077	0.200087
2009	237	SC Firm 237	6	TW	1	MAN	9000	TECH	1	0.205442	0.0906446	0.00519215	0.00200808	0.129037	2.26645	13.08	0.25895	0.0494178		-0.00463605	0.0857905	0.0811544	0.0811544	0.205442	0.0906446	1.85608	1072342	106891	0.794558	0.215673
2010	237	SC Firm 237	6	TW	1	MAN	9000	TECH	1	0.239005	0.103426	0.0069006	0.00254569	0.212781	2.31088	13.5794	0.22993	0.0580636		0.0680507	0.0805472	0.148598	0.148598	0.239005	0.103426	2.3378	1295461	149441	0.760995	0.252573
2011	237	SC Firm 237	6	TW	1	MAN	9000	TECH	1	0.260066	0.104447	0.0557014	0.0191979	0.208583	2.48993	13.68	0.289675	0.00303251		0.0510093	0.00124188	0.0522512	0.0522512	0.260066	0.104447	2.51674	1593980	185904	0.739934	0.239977
2012	237	SC Firm 237	6	TW	1	MAN	9000	TECH	1	0.246267	0.0814117	0.0183162	0.00503557	0.178514	3.02496	13.7627	0.266069	0.0182883		0.0222995	0.0762774	0.098577	0.098577	0.246267	0.0814117	3.83748	2306447	204413	0.753733	0.255108
2013	237	SC Firm 237	6	TW	1	MAN	9000	TECH	1	0.277969	0.0605879	0.00824129	0.00139019	0.187012	4.58787	13.8435	0.289329	0.00658132		0.0566384	0.0043103	0.0609487	0.0609487	0.277969	0.0605879	6.2964	3980471	256723	0.722031	0.294616
2014	237	SC Firm 237	6	TW	1	MAN	9000	TECH	1	0.263122	0.0509884	0.000506456	7.62373e-05	0.19349	5.16042	13.9378	0.282848	0.00360706		0.00577893	0.0431996	0.0489785	0.0489785	0.263122	0.0509884	7.41619	4885500	262488	0.736878	0.291215
2009	238	SC Firm 238	6	TW	1	MAN	1000	BMAT	1	0.319543	0.212517	0.249706	0.160552	0.0807362	1.50361	15.5441	0.287541	0.0176881		-0.0170547	0.102777	0.0857222	0.0857222	0.319543	0.212517	2.02413	12264583	3.30983e+06	0.680457	0.0930796
2010	238	SC Firm 238	6	TW	1	MAN	1000	BMAT	1	0.260801	0.145356	0.184738	0.0984769	0.121519	1.79422	15.8601	0.237826	0.0326615		-0.0108825	0.0756656	0.0647831	0.0647831	0.260801	0.145356	3.21447	18681147	3.17725e+06	0.739199	0.0983605
2011	238	SC Firm 238	6	TW	1	MAN	1000	BMAT	1	0.30212	0.169878	0.234746	0.126643	0.107429	1.77845	15.7854	0.225553	0.0106443		0.0269839	-0.0594927	-0.0325088	-0.0325088	0.30212	0.169878	2.56664	17048517	3.48886e+06	0.69788	0.101448
2007	239	SC Firm 239	7	IN	1	MAN	3000	CGOODS	1	0.288281	0.052354	0	0	0.307589	5.50637	12.0356	0.203343	0.0521208	9.80136	0.09022	0.0212837	0.111504	0.111504	0.288281	0.052354	34.4274	678536	37486.7	0.711719	0.317197
2008	239	SC Firm 239	7	IN	1	MAN	3000	CGOODS	1	0.290917	0.0576313	0	0	0.264824	5.04791	11.8294	0.153339	0.0167886	3.89096	0.0307183	-0.0114626	0.0192557	0.0192557	0.290917	0.0576313	14.7221	685336	41912.2	0.709083	0.311858
2009	239	SC Firm 239	7	IN	1	MAN	3000	CGOODS	1	0.230565	0.0568874	0	0	0.251621	4.053	11.8391	0.140108	0.00563046	8.47979	-0.0757001	-0.0152655	-0.0909656	-0.0909656	0.230565	0.0568874	27.8653	523099	31552.7	0.769435	0.248628
2010	239	SC Firm 239	7	IN	1	MAN	3000	CGOODS	1	0.30427	0.0428786	0	0	0.243966	7.09608	12.1203	0.146797	0.00361437	10.26	0.129778	0.00424303	0.134021	0.134021	0.30427	0.0428786	41.6465	1228138	55020	0.69573	0.32006
2011	239	SC Firm 239	7	IN	1	MAN	3000	CGOODS	1	0.272788	0.0325709	0	0	0.147873	7.29543	12.3751	0.190788	0.0742734	6.63835	-0.0223363	-0.00569335	-0.0280296	-0.0280296	0.272788	0.0325709	37.2175	1510533	50855.8	0.727212	0.279448
2004	240	SC Firm 240	7	IN	1	MAN	3000	CGOODS	1	0.238951	0.111781	0	0	0.177083	2.13767	12.2033	0.380554	0.0134787	7.92294	0.0133061	0.0105664	0.0238726	0.0238726	0.238951	0.111781	7.56882	327746	41246.5	0.761049	0.290615
2005	240	SC Firm 240	7	IN	1	MAN	3000	CGOODS	1	0.26469	0.0703446	0	0	0.266546	3.76275	12.2784	0.383544	0.0597178	9.28483	-0.00378953	-0.0178908	-0.0216803	-0.0216803	0.26469	0.0703446	12.4205	537408	40664.3	0.73531	0.312304
2006	240	SC Firm 240	7	IN	1	MAN	3000	CGOODS	1	0.267761	0.0802848	0	0	0.237045	3.33514	12.4338	0.312876	0.0168014	9.26396	0.0374656	-0.00495789	0.0325077	0.0325077	0.267761	0.0802848	12.8554	541621	47279.8	0.732239	0.303197
2007	240	SC Firm 240	7	IN	1	MAN	3000	CGOODS	1	0.270776	0.0822966	0	0	0.247664	3.29024	12.6905	0.254515	0.0127945	9.80136	0.0680383	0.00350115	0.0715394	0.0715394	0.270776	0.0822966	18.7951	704160	63146.7	0.729224	0.296197
2008	240	SC Firm 240	7	IN	1	MAN	3000	CGOODS	1	0.285958	0.0959684	0	0	0.220934	2.97971	12.6678	0.202654	0.0125987	3.89096	0.0048071	-0.0187001	-0.013893	-0.013893	0.285958	0.0959684	11.6632	605019	64226.4	0.714042	0.302658
2006	241	SC Firm 241	7	IN	0	SERV	4000	HCARE	1	0.320685	0.054944	0.00453529	0.000560777	0.288777	5.83658	12.7901	0.0529009	0.00103247	9.26396	0.0184128	0.000560751	0.0189735	0.0189735	0.320685	0.054944	26.3648	2237233	130069	0.679315	0.323521
2007	241	SC Firm 241	7	IN	0	SERV	4000	HCARE	1	0.317001	0.0768711	0.00415188	0.000747459	0.285264	4.1238	12.9385	0.0456379	0.00139853	9.80136	0.0654354	0.00462965	0.070065	0.070065	0.317001	0.0768711	26.0843	1968261	163902	0.682999	0.318974
2008	241	SC Firm 241	7	IN	0	SERV	4000	HCARE	1	0.317122	0.0576822	0.00355244	0.00046971	0.270463	5.49774	12.7805	0.0432545	0.00831175	3.89096	-0.0260045	-0.00981899	-0.0358235	-0.0358235	0.317122	0.0576822	23.6857	2474635	151480	0.682878	0.318612
2009	241	SC Firm 241	7	IN	0	SERV	4000	HCARE	1	0.281895	0.0516368	0.00301184	0.000418836	0.270887	5.4592	12.9267	0.0457147	0.000644364	8.47979	0.000500343	0.00107471	0.00157506	0.00157506	0.281895	0.0516368	34.7403	2787037	151749	0.718105	0.282763
2010	241	SC Firm 241	7	IN	0	SERV	4000	HCARE	1	0.302495	0.0424671	0.00262628	0.000269212	0.270555	7.12303	13.0849	0.0418701	0.000179613	10.26	0.0611402	0.0016134	0.0627536	0.0627536	0.302495	0.0424671	52.2931	4288351	190191	0.697505	0.303768
2004	242	SC Firm 242	7	IN	1	MAN	9000	TECH	1	0.222794	0.0860713	0.0575544	0.0196686	0.142257	2.58848	13.2494	0.124748		7.92294	0.129173	0.07654	0.205713	0.205713	0.222794	0.0860713	1.97372	1950779	183719	0.777206	0.175498
2005	242	SC Firm 242	7	IN	1	MAN	9000	TECH	1	0.180057	0.063033	0.0466282	0.014762	0.165929	2.85655	13.5438	0.142717	0.0159486	9.28483	0.00719057	0.207653	0.214844	0.214844	0.180057	0.063033	2.97387	2844525	191361	0.819943	0.140917
2006	242	SC Firm 242	7	IN	1	MAN	9000	TECH	1	0.195547	0.0546496	0.0142977	0.00343771	0.185255	3.5782	13.7912	0.173304	0.0085103	9.26396	0.0209357	-0.00231311	0.0186226	0.0186226	0.195547	0.0546496	3.60774	3707135	214305	0.804453	0.184352
2007	242	SC Firm 242	7	IN	1	MAN	9000	TECH	1	0.206992	0.0585794	0.015068	0.00363374	0.185824	3.53353	14.1445	0.165945	0.000179613	9.80136	0.0689409	0.122862	0.191803	0.191803	0.206992	0.0585794	4.1532	5163983	321326	0.793008	0.194895
2008	242	SC Firm 242	7	IN	1	MAN	9000	TECH	1	0.313185	0.11484	0.0104072	0.00298326	0.213734	2.72714	14.4366	0.201456	0.0164489	3.89096	0.13165	-0.0659667	0.0656831	0.0656831	0.313185	0.11484	1.17754	4272798	554352	0.686815	0.307811
2006	243	SC Firm 243	7	IN	0	SERV	5000	CSERV	1	0.248971	0.0377844	0.00179228	0.000212638	0.130947	6.58925	11.3336	0.0316632	0.129833	9.26396	0.117881	0.410394	0.528276	0.528276	0.248971	0.0377844	8.50305	418147	16419.9	0.751029	0.247623
2007	243	SC Firm 243	7	IN	0	SERV	5000	CSERV	1	0.276603	0.0413281	0.0131188	0.00149649	0.174093	6.69286	11.3336	0.100776	0.0314133	9.80136	0.0993106	0.0357709	0.135081	0.135081	0.276603	0.0413281	2.10555	594239	25617.5	0.723397	0.266987
2008	243	SC Firm 243	7	IN	0	SERV	5000	CSERV	1	0.191462	0.0583293	0.00110929	0.000290407	0.164507	3.28244	11.3336	0.0951483	0.00869441	3.89096	-0.130514	-0.118515	-0.249029	-0.249029	0.191462	0.0583293	4.77398	245928	15233.3	0.808538	0.190565
2009	243	SC Firm 243	7	IN	0	SERV	5000	CSERV	1	0.194012	0.0375068	0.00163406	0.000264895	0.134745	5.17272	11.3336	0.0741689	0.018412	8.47979	0.0471949	0.0433033	0.0904982	0.0904982	0.194012	0.0375068	7.39206	516577	20130.2	0.805988	0.192693
2010	243	SC Firm 243	7	IN	0	SERV	5000	CSERV	1	0.258259	0.0407851	0.00154658	0.000189123	0.142294	6.33218	11.3336	0.107057	0.00556432	10.26	0.105488	0.00271719	0.108206	0.108206	0.258259	0.0407851	5.35135	800346	34030.1	0.741741	0.25711
2011	243	SC Firm 243	7	IN	0	SERV	5000	CSERV	1	0.257762	0.0426934	0.00125025	0.000160732	0.166491	6.03752	11.3336	0.0882713	0.0184742	6.63835	0.014058	-0.0373626	-0.0233046	-0.0233046	0.257762	0.0426934	6.27023	807067	35993.1	0.742238	0.256833
2012	243	SC Firm 243	7	IN	0	SERV	5000	CSERV	1	0.262908	0.0519197	0.00155397	0.000238902	0.146583	5.06375	11.3738	0.121641	0.0158846	5.08142	0.0262347	-0.0152088	0.0110259	0.0110259	0.262908	0.0519197	7.47492	730108	39982.9	0.737092	0.261761
2004	244	SC Firm 244	7	IN	1	MAN	9000	TECH	1	0.212233	0.0244462	0	0	0.345825	7.29543	14.3066	0.220823	0.0266934	7.92294	-0.0516329	0.0794723	0.0278394	0.0278394	0.212233	0.0244462	8.33014	13972362	328444	0.787767	0.212233
2005	244	SC Firm 244	7	IN	1	MAN	9000	TECH	1	0.257356	0.0282645	0	0	0.329531	7.29543	14.5766	0.232942	0.0144168	9.28483	0.101608	0.0566124	0.15822	0.15822	0.257356	0.0282645	12.7057	18658628	542716	0.742644	0.257356
2006	244	SC Firm 244	7	IN	1	MAN	9000	TECH	1	0.160638	0.0244462	0	0	0.327467	7.29543	14.986	0.237303	0.00437822	9.26396	-0.0138046	0.106283	0.0924788	0.0924788	0.160638	0.0244462	11.236	26084674	499768	0.839362	0.160638
2007	244	SC Firm 244	7	IN	1	MAN	9000	TECH	1	0.233015	0.0476897	0	0	0.291227	4.88605	15.2436	0.227288	0.0220304	9.80136	0.121813	0.017972	0.139785	0.139785	0.233015	0.0476897	5.74027	20911929	1.04723e+06	0.766985	0.233015
2008	244	SC Firm 244	7	IN	1	MAN	9000	TECH	1	0.174706	0.0471394	0	0	0.324623	3.70615	15.2719	0.210486	0.0228453	3.89096	-0.064196	-0.0338393	-0.0980353	-0.0980353	0.174706	0.0471394	14.0145	15480083	765823	0.825294	0.176375
2009	244	SC Firm 244	7	IN	1	MAN	9000	TECH	1	0.12404	0.0244462	0	0	0.284369	5.37307	15.4401	0.160763	0.0283076	8.47979	-0.000213171	0.0234401	0.0232269	0.0232269	0.12404	0.0244462	19.2548	32351840	764509	0.87596	0.128169
2010	244	SC Firm 244	7	IN	1	MAN	9000	TECH	1	0.126667	0.0244462	0	0	0.286729	5.88886	15.6364	0.154944	0.00629514	10.26	0.0177976	-0.000639934	0.0171577	0.0171577	0.126667	0.0244462	13.0525	40463512	889488	0.873333	0.126667
2011	244	SC Firm 244	7	IN	1	MAN	9000	TECH	1	0.127125	0.0280437	0	0	0.279441	4.53311	15.7073	0.14105	0.00293408	6.63835	0.00913151	-0.00823859	0.000892926	0.000892926	0.127125	0.0280437	10.5415	33214202	958325	0.872875	0.127438
2012	244	SC Firm 244	7	IN	1	MAN	9000	TECH	1	0.138832	0.0371586	0	0	0.249358	3.7362	15.8216	0.139544	0.0212176	5.08142	0.0266059	-0.00216051	0.0244454	0.0244454	0.138832	0.0371586	14.1005	30718799	1.18552e+06	0.861168	0.141399
2013	244	SC Firm 244	7	IN	1	MAN	9000	TECH	1	0.165822	0.0498819	0	0	0.238437	3.3243	15.9383	0.138235	0.00752784	6.89922	0.0411408	-0.00338276	0.0377581	0.0377581	0.165822	0.0498819	15.6477	30032027	1.5767e+06	0.834178	0.166944
2014	244	SC Firm 244	7	IN	1	MAN	9000	TECH	1	0.172248	0.0428284	0	0	0.228373	4.02182	15.9627	0.137524	0.00147976	7.28625	0.0242509	-0.00327225	0.0209786	0.0209786	0.172248	0.0428284	16.6983	41011754	1.83506e+06	0.827752	0.174659
2006	245	SC Firm 245	7	IN	1	MAN	3000	CGOODS	1	0.304009	0.12111	0.0947963	0.0319809	0.184409	2.51019	15.0484	0.281979	0.00578897	9.26396	0.0488297	0.00982238	0.0586521	0.0586521	0.304009	0.12111	25.2539	5360572	738677	0.695991	0.258069
2007	245	SC Firm 245	7	IN	1	MAN	3000	CGOODS	1	0.298431	0.134918	0.127306	0.0507691	0.177219	2.21194	15.3249	0.324243	0.0183994	9.80136	0.0654344	0.0041643	0.0695987	0.0695987	0.298431	0.134918	10.7081	6066485	946127	0.701569	0.217699
2008	245	SC Firm 245	7	IN	1	MAN	3000	CGOODS	1	0.303704	0.155338	0.0766	0.0337946	0.110145	1.95511	15.2232	0.361045	0.0514975	3.89096	-0.0360298	-0.0304178	-0.0664477	-0.0664477	0.303704	0.155338	33.6228	4599028	845787	0.696296	0.26291
2009	245	SC Firm 245	7	IN	1	MAN	3000	CGOODS	1	0.268446	0.102805	0.0726906	0.0238929	0.208083	2.61121	15.7034	0.326958	0.0701739	8.47979	0.0451264	0.0152223	0.0603487	0.0603487	0.268446	0.102805	31.8031	8872856	1.0167e+06	0.731554	0.22465
2010	245	SC Firm 245	7	IN	1	MAN	3000	CGOODS	1	0.242041	0.115332	0.0382781	0.0159893	0.194841	2.09864	15.9369	0.340479	0.0124653	10.26	0.00513796	-0.00293921	0.00219875	0.00219875	0.242041	0.115332	17.3231	7967831	1.03875e+06	0.757959	0.220927
2011	245	SC Firm 245	7	IN	1	MAN	3000	CGOODS	1	0.308132	0.150258	0.0887912	0.037248	0.117831	2.05069	15.7748	0.366969	0.0518734	6.63835	0.0793749	-0.00165437	0.0777205	0.0777205	0.308132	0.150258	27.0967	7912649	1.39917e+06	0.691868	0.254
2012	245	SC Firm 245	7	IN	1	MAN	3000	CGOODS	1	0.293331	0.171156	0.0772625	0.0399892	0.163993	1.71383	15.915	0.427525	0.019668	5.08142	0.0173304	0.00237434	0.0197048	0.0197048	0.293331	0.171156	28.5421	7201134	1.48703e+06	0.706669	0.249337
2013	245	SC Firm 245	7	IN	1	MAN	3000	CGOODS	1	0.298102	0.140875	0.0853365	0.034769	0.177611	2.11607	15.8201	0.428549	0.0106526	6.89922	0.0146138	0.00375802	0.0183718	0.0183718	0.298102	0.140875	52.8288	9536125	1.56369e+06	0.701898	0.251558
2014	245	SC Firm 245	7	IN	1	MAN	3000	CGOODS	1	0.280632	0.0791749	0.028408	0.00640312	0.20187	3.54446	15.9144	0.408508	0.0131051	7.28625	-0.00182844	-0.00443906	-0.00626749	-0.00626749	0.280632	0.0791749	69.8198	18068359	1.55356e+06	0.719368	0.273648
2007	246	SC Firm 246	7	IN	1	MAN	2000	IND	1	0.222567	0.0702741	0.0604377	0.0166998	0.301599	3.16713	14.1886	0.51319	0.0300203	9.80136	0.0155448	0.0356843	0.0512291	0.0512291	0.222567	0.0702741	3.73413	5064254	382786	0.777433	0.232528
2008	246	SC Firm 246	7	IN	1	MAN	2000	IND	1	0.224865	0.118231	0.0453215	0.0214711	0.224634	1.9019	14.0671	0.60101	0.0531331	3.89096	-0.0121831	-0.0550871	-0.0672702	-0.0672702	0.224865	0.118231	1.44195	2708088	363112	0.775135	0.240243
2009	246	SC Firm 246	7	IN	1	MAN	2000	IND	1	0.21472	0.112621	0.0231785	0.0108937	0.211292	1.90657	14.2376	0.672273	0.0101008	8.47979	0.0252546	0.0223375	0.0475921	0.0475921	0.21472	0.112621	2.24677	3242434	411513	0.78528	0.254031
2010	246	SC Firm 246	7	IN	1	MAN	2000	IND	1	0.237083	0.104009	0.00814101	0.00305663	0.176057	2.27945	14.3183	0.61816	0.0272355	10.26	0.0599571	0.0201142	0.0800714	0.0800714	0.237083	0.104009	3.20358	4744979	550810	0.762917	0.288247
2011	246	SC Firm 246	7	IN	1	MAN	2000	IND	1	0.247694	0.0940851	0.0078197	0.0024799	0.172868	2.63266	14.296	0.579689	0.00299091	6.63835	-0.00452401	-0.0260835	-0.0306075	-0.0306075	0.247694	0.0940851	2.93058	5208439	540930	0.752306	0.297438
2012	246	SC Firm 246	7	IN	1	MAN	2000	IND	1	0.242995	0.0798887	0.00641717	0.00174392	0.22407	3.04168	14.3928	0.520626	0.014909	5.08142	0.00205303	-0.00722872	-0.00517569	-0.00517569	0.242995	0.0798887	3.65339	6283201	545539	0.757005	0.282515
2013	246	SC Firm 246	7	IN	1	MAN	2000	IND	1	0.226181	0.0829717	0.0047923	0.00148838	0.128777	2.726	14.214	0.524621	0.0457866	6.89922	-0.0340248	-0.016894	-0.0509188	-0.0509188	0.226181	0.0829717	2.9555	5241045	474204	0.773819	0.266009
2014	246	SC Firm 246	7	IN	1	MAN	2000	IND	1	0.231976	0.0825316	0.00318244	0.000949932	0.139325	2.81076	14.277	0.50105	0.00826121	7.28625	0.0166137	0.00219944	0.0188131	0.0188131	0.231976	0.0825316	3.63081	5678183	510785	0.768024	0.271967
2009	247	SC Firm 247	7	IN	1	MAN	9000	TECH	1	0.282013	0.103428	0.0104766	0.00309991	0.263062	2.72665	12.5752	0.306103	0.0511496	8.47979	-0.173688	-0.0537636	-0.227451	-0.227451	0.282013	0.103428	3.12643	509663	58794.6	0.717987	0.274411
2010	247	SC Firm 247	7	IN	1	MAN	9000	TECH	1	0.234894	0.132343	0.00589139	0.00293569	0.175259	1.77489	12.7336	0.290981	0.0623516	10.26	-0.0231185	0.0113905	-0.0117281	-0.0117281	0.234894	0.132343	1.87002	350926	53526.5	0.765106	0.23036
2011	247	SC Firm 247	7	IN	1	MAN	9000	TECH	1	0.282781	0.155695	0.0448059	0.0214681	0.219541	1.81625	12.8386	0.197288	0.044116	6.63835	0.0787582	-0.0365832	0.0421749	0.0421749	0.282781	0.155695	3.0956	402314	74189.1	0.717219	0.249138
2012	247	SC Firm 247	7	IN	1	MAN	9000	TECH	1	0.223122	0.0895412	0.018968	0.00657724	0.28764	2.49184	12.9834	0.185216	0.0588831	5.08142	-0.0150198	0.0367215	0.0217017	0.0217017	0.223122	0.0895412	6.16606	706780	69509.9	0.776878	0.208102
2013	247	SC Firm 247	7	IN	1	MAN	9000	TECH	1	0.218586	0.0798052	0.00194683	0.000604395	0.308945	2.739	13.1328	0.179194	0.0139098	6.89922	0.0199131	-0.0152966	0.00461651	0.00461651	0.218586	0.0798052	10.1793	881819	76477	0.781414	0.217062
2014	247	SC Firm 247	7	IN	1	MAN	9000	TECH	1	0.241855	0.0551622	0.0090099	0.00166116	0.282647	4.38443	13.2567	0.183321	0.0184609	7.28625	0.0624474	-0.00131821	0.0611292	0.0611292	0.241855	0.0551622	10.8292	1765877	103097	0.758145	0.234962
2008	248	SC Firm 248	7	IN	1	MAN	1000	BMAT	1	0.0905038	0.0244462	0	0	0.397801	5.04402	14.2183	0.0772618	0.0151734	3.89096	0.0144482	0.0184782	0.0329264	0.0329264	0.0905038	0.0244462	9.13039	12608745	230370	0.909496	0.0957845
2009	248	SC Firm 248	7	IN	1	MAN	1000	BMAT	1	0.0857757	0.0244462	0	0	0.282671	7.29438	14.1467	0.0857897	0.121184	8.47979	0.0200875	0.00485695	0.0249444	0.0249444	0.0857757	0.0244462	6.23266	25280737	300817	0.914224	0.0915905
2010	248	SC Firm 248	7	IN	1	MAN	1000	BMAT	1	0.0846403	0.0244462	0	0	0.397801	5.28523	14.7531	0.0746588	0.0901287	10.26	0.0209248	0.000690533	0.0216153	0.0216153	0.0846403	0.0244462	3.03528	24646816	399980	0.91536	0.0892777
2011	248	SC Firm 248	7	IN	1	MAN	1000	BMAT	1	0.0846403	0.031503	0	0	0.335157	2.55149	14.6102	0.0977603	0.0522367	6.63835	0.00402623	-0.00277741	0.00124883	0.00124883	0.0846403	0.031503	3.00236	12945017	421071	0.91536	0.0841355
2012	248	SC Firm 248	7	IN	1	MAN	1000	BMAT	1	0.102862	0.0545311	0	0	0.23977	1.8863	14.4946	0.143549	0.0671691	5.08142	0.028611	-0.000938421	0.0276725	0.0276725	0.102862	0.0545311	2.29612	10113732	583322	0.897138	0.106257
2013	248	SC Firm 248	7	IN	1	MAN	1000	BMAT	1	0.0846403	0.0255366	0	0	0.247353	1.73098	14.5134	0.209622	0.00509371	6.89922	-0.0671133	-0.0015964	-0.0687097	-0.0687097	0.0846403	0.0255366	2.30049	8839045	231634	0.91536	0.0775952
2014	248	SC Firm 248	7	IN	1	MAN	1000	BMAT	1	0.0846403	0.0392095	0	0	0.226611	1.55321	14.5006	0.2625	0.0155737	7.28625	0.0190409	-0.000809665	0.0182313	0.0182313	0.0846403	0.0392095	1.35729	8257820	336998	0.91536	0.0775952
2004	249	SC Firm 249	7	IN	1	MAN	9000	TECH	1	0.193232	0.058814	0	0	0.211399	3.28548	12.4721	0.0911444	0.00268494	7.92294	0.0702939	0.00138274	0.0716766	0.0716766	0.193232	0.058814	20.9656	1006276	62881.5	0.806768	0.193346
2005	249	SC Firm 249	7	IN	1	MAN	9000	TECH	1	0.224115	0.0375379	0	0	0.183292	5.97038	12.7167	0.120008	0.0227593	9.28483	0.0669605	0.0204982	0.0874587	0.0874587	0.224115	0.0375379	38.7976	2299220	89674	0.775885	0.224208
2006	249	SC Firm 249	7	IN	1	MAN	9000	TECH	1	0.181636	0.0305758	0	0	0.150731	5.94051	13.0777	0.0977704	0.0204641	9.26396	0.0499673	0.227444	0.277412	0.277412	0.181636	0.0305758	33.64	3922129	123705	0.818364	0.181695
2007	249	SC Firm 249	7	IN	1	MAN	9000	TECH	1	0.181901	0.0715935	0	0	0.137619	2.54075	13.2959	0.100474	0.00824235	9.80136	0.0360836	0.00818957	0.0442732	0.0442732	0.181901	0.0715935	8.27266	2001134	154316	0.818099	0.182039
2008	249	SC Firm 249	7	IN	1	MAN	9000	TECH	1	0.167435	0.0990052	0	0	0.184102	1.69118	13.2691	0.0860864	0.038204	3.89096	-0.0177929	-0.0587249	-0.0765177	-0.0765177	0.167435	0.0990052	43.8419	1269450	139493	0.832565	0.167927
2009	249	SC Firm 249	7	IN	1	MAN	9000	TECH	1	0.12298	0.0311687	0	0	0.209998	3.94561	13.3716	0.0729651	0.0206197	8.47979	-0.00466693	0.023732	0.019065	0.019065	0.12298	0.0311687	45.9088	4177393	134393	0.87702	0.123652
2010	249	SC Firm 249	7	IN	1	MAN	9000	TECH	1	0.116559	0.042203	0	0	0.185045	2.76187	13.4197	0.0623041	0.0152958	10.26	0.0189437	0.00260333	0.021547	0.021547	0.116559	0.042203	30.7499	3641949	160473	0.883441	0.118053
2011	249	SC Firm 249	7	IN	1	MAN	9000	TECH	1	0.123473	0.0377781	0	0	0.153936	3.26837	13.3352	0.0591767	0.0218556	6.63835	0.0103761	-0.0179875	-0.00761138	-0.00761138	0.123473	0.0377781	52.558	4462305	175196	0.876527	0.124755
2012	249	SC Firm 249	7	IN	1	MAN	9000	TECH	1	0.119574	0.0442504	0	0	0.144848	2.7022	13.3692	0.047418	0.00736199	5.08142	0.00658979	-0.0064041	0.000185687	0.000185687	0.119574	0.0442504	46.8346	4004704	185415	0.880426	0.120044
2013	249	SC Firm 249	7	IN	1	MAN	9000	TECH	1	0.0968051	0.0363499	0	0	0.143894	2.66314	13.3431	0.0367469	0.000383045	6.89922	-0.0175975	-0.00875118	-0.0263487	-0.0263487	0.0968051	0.0363499	53.3484	4159315	156894	0.903195	0.0975024
2004	250	SC Firm 250	7	IN	1	MAN	2000	IND	1	0.281822	0.0804298	0	0	0.230294	3.50395	11.3336	0.163732	0.0110967	7.92294	-0.15189	0.00667802	-0.145212	-0.145212	0.281822	0.0804298	13.3137	143819	12579.1	0.718178	0.300417
2005	250	SC Firm 250	7	IN	1	MAN	2000	IND	1	0.302765	0.0717334	0	0	0.255309	4.2207	11.3442	0.116296	0.0181676	9.28483	0.0784772	-0.00844212	0.0700351	0.0700351	0.302765	0.0717334	19.046	219735	16980.4	0.697235	0.312454
2006	250	SC Firm 250	7	IN	1	MAN	2000	IND	1	0.285296	0.0497246	0	0	0.256947	5.73753	11.6497	0.141522	0.00545295	9.26396	0.0461309	-0.00637842	0.0397524	0.0397524	0.285296	0.0497246	34.414	387101	20255.6	0.714704	0.285296
2007	250	SC Firm 250	7	IN	1	MAN	2000	IND	1	0.271467	0.0447607	0	0	0.262665	6.06486	11.9515	0.244491	0.00816212	9.80136	0.0712864	0.00531293	0.0765993	0.0765993	0.271467	0.0447607	58.437	586214	27468.9	0.728533	0.271467
2008	250	SC Firm 250	7	IN	1	MAN	2000	IND	1	0.269053	0.091222	0	0	0.192083	2.94943	11.9388	0.298564	0.0501014	3.89096	-0.0089336	-0.00359244	-0.012526	-0.012526	0.269053	0.091222	19.0253	264858	26586.1	0.730947	0.275566
2009	250	SC Firm 250	7	IN	1	MAN	2000	IND	1	0.275749	0.0655073	0	0	0.225378	4.20945	12.3992	0.294616	0.0146899	8.47979	0.0819004	0.005108	0.0870084	0.0870084	0.275749	0.0655073	81.462	539501	37818.6	0.724251	0.28292
2010	250	SC Firm 250	7	IN	1	MAN	2000	IND	1	0.281804	0.0542841	0.0219978	0.00327961	0.209911	5.19127	12.4973	0.340005	0.00778439	10.26	0.0576254	-0.00565701	0.0519684	0.0519684	0.281804	0.0542841	66.8563	828222	47540	0.718196	0.26565
2004	251	SC Firm 251	7	IN	0	SERV	4000	HCARE	1	0.261774	0.049342	0	0	0.375329	5.30529	12.0437	0.257358	0.05247	7.92294	0.0146165	0.00187804	0.0164945	0.0164945	0.261774	0.049342	30.0867	666645	34600.9	0.738226	0.261774
2005	251	SC Firm 251	7	IN	0	SERV	4000	HCARE	1	0.246084	0.04159	0	0	0.31739	5.9169	12.0987	0.196992	0.037685	9.28483	0.0221185	-0.00368751	0.018431	0.018431	0.246084	0.04159	36.6715	876096	38018	0.753916	0.246084
2006	251	SC Firm 251	7	IN	0	SERV	4000	HCARE	1	0.286628	0.0740337	0	0	0.253859	3.87159	12.208	0.162168	0.0425631	9.26396	0.0943714	0.0160573	0.110429	0.110429	0.286628	0.0740337	30.4736	708912	56679.6	0.713372	0.302722
2007	251	SC Firm 251	7	IN	0	SERV	4000	HCARE	1	0.228976	0.0808458	0	0	0.186597	2.83226	12.3096	0.156145	0.0493694	9.80136	-0.014491	-0.00976188	-0.0242529	-0.0242529	0.228976	0.0808458	29.2969	606049	53306.1	0.771024	0.228976
2008	251	SC Firm 251	7	IN	0	SERV	4000	HCARE	1	0.219088	0.0792338	0	0	0.171458	2.76508	12.218	0.136151	0.00543108	3.89096	-0.0210853	0.00243536	-0.0186499	-0.0186499	0.219088	0.0792338	19.7289	565079	48626.2	0.780912	0.231047
2009	251	SC Firm 251	7	IN	0	SERV	4000	HCARE	1	0.224111	0.0687348	0	0	0.12125	3.26052	12.2549	0.139157	0.0343552	8.47979	0.0392583	0.00315843	0.0424167	0.0424167	0.224111	0.0687348	36.3173	798738	58953.3	0.775889	0.236591
2010	251	SC Firm 251	7	IN	0	SERV	4000	HCARE	1	0.276894	0.0834546	0	0	0.102632	3.3179	12.3997	0.129471	0.0128483	10.26	0.0918218	0.000964382	0.0927862	0.0927862	0.276894	0.0834546	43.0879	968687	88202.3	0.723106	0.287756
2011	251	SC Firm 251	7	IN	0	SERV	4000	HCARE	1	0.251215	0.0571444	0	0	0.165087	4.39614	12.411	0.125055	0.0393235	6.63835	-0.0599653	-0.0118245	-0.0717898	-0.0717898	0.251215	0.0571444	43.6797	1174856	71205.4	0.748785	0.256845
2012	251	SC Firm 251	7	IN	0	SERV	4000	HCARE	1	0.248825	0.0641854	0	0	0.197492	3.87666	12.564	0.143982	0.00135095	5.08142	0.00879742	0.00630245	0.0150999	0.0150999	0.248825	0.0641854	41.5596	1076217	73815.2	0.751175	0.261869
2013	251	SC Firm 251	7	IN	0	SERV	4000	HCARE	1	0.263504	0.063664	0	0	0.221115	4.13898	12.5869	0.206864	0.0209759	6.89922	0.0206415	0.00396846	0.02461	0.02461	0.263504	0.063664	44.1143	1177906	80089	0.736496	0.283037
2014	251	SC Firm 251	7	IN	0	SERV	4000	HCARE	1	0.308802	0.0760907	0	0	0.159723	4.05834	12.6563	0.212793	0.0392936	7.28625	0.0821908	0.00401614	0.0862069	0.0862069	0.308802	0.0760907	56.5514	1325164	109137	0.691198	0.332989
2011	252	SC Firm 252	7	IN	1	MAN	2000	IND	1	0.328231	0.122126	0	0	0.197941	2.68764	13.0375	0.235077	0.00230784	6.63835	-0.0123401	-0.0164943	-0.0288344	-0.0288344	0.328231	0.122126	10.9866	671068	93356	0.671769	0.329292
2012	252	SC Firm 252	7	IN	1	MAN	2000	IND	1	0.272263	0.103699	0	0	0.164044	2.62552	12.9119	0.254565	0.025183	5.08142	-0.0487746	0.00130515	-0.0474694	-0.0474694	0.272263	0.103699	11.6367	684314	79172.6	0.727737	0.277485
2013	252	SC Firm 252	7	IN	1	MAN	2000	IND	1	0.245244	0.0934576	0	0	0.156374	2.62412	12.8162	0.236567	0.00676516	6.89922	-0.0433711	-0.0121609	-0.0555319	-0.0555319	0.245244	0.0934576	10.7621	652571	67275.1	0.754756	0.247621
2014	252	SC Firm 252	7	IN	1	MAN	2000	IND	1	0.258949	0.0644515	0	0	0.144735	4.01773	12.8537	0.201434	0.00756994	7.28625	0.0370746	-0.00339222	0.0336824	0.0336824	0.258949	0.0644515	21.4176	1139710	78516.6	0.741051	0.258991
2007	253	SC Firm 253	7	IN	0	SERV	4000	HCARE	1	0.159489	0.036119	0.0273429	0.00552084	0.255273	4.41567	13.6396	0.169187	0.0740038	9.80136	-0.0639454	0.165126	0.10118	0.10118	0.159489	0.036119	2.19051	6464858	242254	0.840511	0.155243
2008	253	SC Firm 253	7	IN	0	SERV	4000	HCARE	1	0.132601	0.0440881	0.0243739	0.00748097	0.225629	3.00763	13.6471	0.17462	0.0202448	3.89096	-0.0156225	0.0132925	-0.00233	-0.00233	0.132601	0.0440881	3.25172	4698906	216721	0.867399	0.12579
2009	253	SC Firm 253	7	IN	0	SERV	4000	HCARE	1	0.123705	0.0302201	0.0211377	0.00474415	0.129095	4.09346	13.704	0.18492	0.069659	8.47979	0.0166832	0.00251731	0.0192005	0.0192005	0.123705	0.0302201	5.4245	8038820	250504	0.876295	0.11811
2010	253	SC Firm 253	7	IN	0	SERV	4000	HCARE	1	0.222659	0.0582046	0.0423832	0.00945903	0.158806	3.82545	14.0675	0.199535	0.0212515	10.26	0.132524	-0.00172972	0.130795	0.130795	0.222659	0.0582046	4.69393	10013000	618821	0.777341	0.199152
2011	253	SC Firm 253	7	IN	0	SERV	4000	HCARE	1	0.247846	0.0628415	0.0255867	0.00531515	0.198954	3.94399	14.2707	0.179565	0.0275985	6.63835	0.0567609	0.0200034	0.0767643	0.0767643	0.247846	0.0628415	6.6944	11969773	802638	0.752154	0.237517
2012	253	SC Firm 253	7	IN	0	SERV	4000	HCARE	1	0.261754	0.0591778	0.0169572	0.0030508	0.241729	4.42318	14.5487	0.180882	0.0311945	5.08142	0.0500844	0.0121891	0.0622735	0.0622735	0.261754	0.0591778	9.18204	15779882	992555	0.738246	0.258996
2006	254	SC Firm 254	7	IN	1	MAN	9000	TECH	1	0.323396	0.034956	0.0537463	0.00428598	0.384707	7.29543	15.2823	0.18234	0.0331589	9.26396	0.133843	0.00594171	0.139784	0.139784	0.323396	0.034956	13.4695	27314982	989408	0.676604	0.290403
2007	254	SC Firm 254	7	IN	1	MAN	9000	TECH	1	0.298596	0.0611047	0.0356169	0.0056144	0.32495	4.88663	15.5475	0.20361	0.0413437	9.80136	0.0731736	0.0109216	0.0840953	0.0840953	0.298596	0.0611047	4.84318	20137476	1.31058e+06	0.701404	0.273845
2008	254	SC Firm 254	7	IN	1	MAN	9000	TECH	1	0.305194	0.112703	0.0346099	0.0102606	0.317047	2.70795	15.5204	0.185076	0.000514813	3.89096	0.0124795	-0.00481779	0.00766167	0.00766167	0.305194	0.112703	15.921	10757918	1.36645e+06	0.694806	0.281546
2009	254	SC Firm 254	7	IN	1	MAN	9000	TECH	1	0.327033	0.0569844	0.00556945	0.000695943	0.318169	5.739	15.718	0.1559	0.00135349	8.47979	0.103566	-0.00415389	0.0994123	0.0994123	0.327033	0.0569844	25.6769	33092994	1.99974e+06	0.672967	0.322121
2010	254	SC Firm 254	7	IN	1	MAN	9000	TECH	1	0.249892	0.0349636	0.003042	0.000331727	0.342084	7.14722	15.9418	0.156948	0.0180611	10.26	-0.0225234	0.00642215	-0.0161012	-0.0161012	0.249892	0.0349636	21.5588	50631566	1.8344e+06	0.750108	0.247894
2011	254	SC Firm 254	7	IN	1	MAN	9000	TECH	1	0.282547	0.0471498	0.00424961	0.000535948	0.349778	5.99254	16.0785	0.151634	0.00564447	6.63835	0.0567675	0.00222686	0.0589943	0.0589943	0.282547	0.0471498	22.4872	46392176	2.29562e+06	0.717453	0.281262
2012	254	SC Firm 254	7	IN	1	MAN	9000	TECH	1	0.256607	0.0412067	0.00666955	0.000835281	0.345801	6.22732	16.2669	0.151186	0.00174527	5.08142	0.0177512	0.00454773	0.022299	0.022299	0.256607	0.0412067	34.6069	57383770	2.46622e+06	0.743393	0.254213
2013	254	SC Firm 254	7	IN	1	MAN	9000	TECH	1	0.262657	0.0420827	0.00670098	0.000831289	0.375302	6.24146	16.4281	0.151975	0.0210093	6.89922	0.0422362	0.00413855	0.0463748	0.0463748	0.262657	0.0420827	40.5878	66894984	2.93879e+06	0.737343	0.262282
2014	254	SC Firm 254	7	IN	1	MAN	9000	TECH	1	0.30794	0.0430661	0.00807893	0.000823094	0.332992	7.15042	16.5366	0.164843	0.0329537	7.28625	0.0594615	-0.00669442	0.052767	0.052767	0.30794	0.0430661	36.8114	80926845	3.64205e+06	0.69206	0.30696
2009	255	SC Firm 255	7	IN	1	MAN	3000	CGOODS	1	0.266518	0.0734492	0.0247612	0.0055086	0.306164	3.62861	11.7904	0.483341	0.105082	8.47979	-0.0351439	0.0232376	-0.0119063	-0.0119063	0.266518	0.0734492	23.972	289834	22975.6	0.733482	0.281441
2010	255	SC Firm 255	7	IN	1	MAN	3000	CGOODS	1	0.223534	0.0559655	0.00143887	0.00029664	0.394606	3.99413	12.2084	0.374021	0.0696254	10.26	0.0224025	-0.00916931	0.0132331	0.0132331	0.223534	0.0559655	22.0619	430723	25534.7	0.776466	0.238445
2011	255	SC Firm 255	7	IN	1	MAN	3000	CGOODS	1	0.202254	0.0437136	0	0	0.324883	4.6268	12.2335	0.358245	0.0455794	6.63835	0.0103729	0.000391802	0.0107647	0.0107647	0.202254	0.0437136	30.3392	588799	26915.1	0.797746	0.218404
2012	255	SC Firm 255	7	IN	1	MAN	3000	CGOODS	1	0.167208	0.0474028	0	0	0.244665	3.5274	12.0893	0.362502	0.0597518	5.08142	-0.0169942	-0.000750333	-0.0177445	-0.0177445	0.167208	0.0474028	33.0955	490980	24431.9	0.832792	0.181968
2013	255	SC Firm 255	7	IN	1	MAN	3000	CGOODS	1	0.193954	0.047689	0	0	0.173707	4.06706	12.1287	0.328709	0.0545693	6.89922	0.0407509	0.00230241	0.0430533	0.0430533	0.193954	0.047689	71.0416	617661	30930.7	0.806046	0.210825
2004	256	SC Firm 256	7	IN	1	MAN	9000	TECH	1	0.263814	0.0386236	0.0116174	0.00131602	0.299068	6.8304	14.4532	0.184356	0.0357572	7.92294	0.000285301	0.145824	0.14611	0.14611	0.263814	0.0386236	5.43277	10799833	433887	0.736186	0.255161
2005	256	SC Firm 256	7	IN	1	MAN	9000	TECH	1	0.325916	0.0381483	0.0113325	0.000939388	0.274303	7.29543	14.6986	0.181852	0.0156255	9.28483	0.129189	0.0670532	0.196242	0.196242	0.325916	0.0381483	7.24267	18123880	718817	0.674084	0.318189
2006	256	SC Firm 256	7	IN	1	MAN	9000	TECH	1	0.325096	0.0549167	0.0383382	0.0047862	0.260773	5.9198	15.0806	0.190923	0.00703003	9.26396	0.10728	0.0772235	0.184504	0.184504	0.325096	0.0549167	7.03811	18463173	1.07285e+06	0.674904	0.29819
2012	257	SC Firm 257	7	IN	1	MAN	1000	BMAT	1	0.199545	0.0910985	0	0	0.151097	2.19042	13.1265	0.141946	0.0117229	5.08142	-0.250069	-0.000351067	-0.25042	-0.25042	0.199545	0.0910985	28.6076	885773	88780.4	0.800455	0.20029
2013	257	SC Firm 257	7	IN	1	MAN	1000	BMAT	1	0.270057	0.10846	0	0	0.181114	2.48992	13.2008	0.185513	0.0197634	6.89922	0.0468697	-0.00379403	0.0430756	0.0430756	0.270057	0.10846	50.495	883024	107424	0.729943	0.270057
2014	257	SC Firm 257	7	IN	1	MAN	1000	BMAT	1	0.267054	0.056971	0	0	0.189645	4.68754	13.2839	0.11595	0.0144542	7.28625	0.0258318	-0.000500587	0.0253312	0.0253312	0.267054	0.056971	52.1071	1968593	118928	0.732946	0.267054
2009	258	SC Firm 258	7	IN	0	SERV	4000	HCARE	1	0.294598	0.107501	0	0	0.251818	2.74043	12.0052	0.126641	0.0220367	8.47979	-0.00898863	-0.00135663	-0.0103453	-0.0103453	0.294598	0.107501	0	204082	24581.5	0.705402	0.300262
2010	258	SC Firm 258	7	IN	0	SERV	4000	HCARE	1	0.326091	0.0733723	0	0	0.154138	4.44434	12.308	0.111527	0.0701899	10.26	0.0837637	-0.00306722	0.0806965	0.0806965	0.326091	0.0733723	29.311	417751	33078.4	0.673909	0.326509
2011	258	SC Firm 258	7	IN	0	SERV	4000	HCARE	1	0.317679	0.0658193	0	0	0.225722	4.82653	12.5465	0.0997632	0.0548659	6.63835	0.0978024	0.00602792	0.10383	0.10383	0.317679	0.0658193	27.559	678315	47791.9	0.682321	0.317679
2012	258	SC Firm 258	7	IN	0	SERV	4000	HCARE	1	0.285505	0.0686572	0	0	0.225227	4.15841	12.6133	0.115069	0.00224469	5.08142	-0.00422062	0.000506022	-0.0037146	-0.0037146	0.285505	0.0686572	26.9594	638858	47095.6	0.714495	0.286886
2013	258	SC Firm 258	7	IN	0	SERV	4000	HCARE	1	0.308412	0.0892966	0	0	0.241903	3.45379	12.846	0.0841857	0.0133675	6.89922	0.0603431	-0.00290105	0.0574421	0.0574421	0.308412	0.0892966	60.3586	597148	58551.7	0.691588	0.308412
2014	258	SC Firm 258	7	IN	0	SERV	4000	HCARE	1	0.317482	0.0490089	0	0	0.227319	6.47805	12.8147	0.0699271	0.00438973	7.28625	0.0520049	-0.000586836	0.0514181	0.0514181	0.317482	0.0490089	90.7992	1358731	70021.6	0.682518	0.317482
2004	259	SC Firm 259	7	IN	0	SERV	4000	HCARE	1	0.299053	0.07417	0.0908496	0.0184183	0.205393	4.03199	12.0035	0.501934	0.0149762	7.92294	0.108972	0.00956433	0.118536	0.118536	0.299053	0.07417	5.50534	932510	74705.1	0.700947	0.250515
2005	259	SC Firm 259	7	IN	0	SERV	4000	HCARE	1	0.287044	0.0758855	0.102698	0.0228113	0.178575	3.78259	12.0863	0.60291	0.0207539	9.28483	0.0289274	-0.000728498	0.0281989	0.0281989	0.287044	0.0758855	4.236	1011696	83077.4	0.712956	0.22854
2006	259	SC Firm 259	7	IN	0	SERV	4000	HCARE	1	0.292764	0.0886137	0.143648	0.0379061	0.177999	3.30382	12.3402	0.542389	0.0125804	9.26396	0.0653283	0.0225151	0.0878434	0.0878434	0.292764	0.0886137	7.32859	1099876	106940	0.707236	0.202605
2007	259	SC Firm 259	7	IN	0	SERV	4000	HCARE	1	0.263724	0.111374	0.142832	0.055094	0.143842	2.36791	12.4811	0.464573	0.0276924	9.80136	0.0578573	0.018564	0.0764213	0.0764213	0.263724	0.111374	2.39914	1093055	136995	0.736276	0.163403
2006	260	SC Firm 260	7	IN	1	MAN	2000	IND	1	0.227199	0.0580039	0.0362635	0.00781936	0.290324	3.91697	11.9321	0.42224	0.00553131	9.26396	-0.0347841	0.00359437	-0.0311897	-0.0311897	0.227199	0.0580039	12.309	292840	18031.8	0.772801	0.253498
2007	260	SC Firm 260	7	IN	1	MAN	2000	IND	1	0.215165	0.0560905	0	0	0.302548	3.83602	12.236	0.321826	0.0139837	9.80136	0.0512792	0.023075	0.0743542	0.0743542	0.215165	0.0560905	18.8315	398391	23673.8	0.784835	0.262552
2008	260	SC Firm 260	7	IN	1	MAN	2000	IND	1	0.190764	0.0733859	0	0	0.244656	2.59947	12.2113	0.313622	0.0244437	3.89096	-0.0327319	-0.0357122	-0.0684441	-0.0684441	0.190764	0.0733859	8.71034	255142	20206.7	0.809236	0.232952
2009	260	SC Firm 260	7	IN	1	MAN	2000	IND	1	0.181602	0.0625063	0	0	0.180147	2.90533	12.1838	0.288912	0.0444763	8.47979	0.0199373	0.00624032	0.0261776	0.0261776	0.181602	0.0625063	15.1361	340444	22698.7	0.818398	0.218707
2010	260	SC Firm 260	7	IN	1	MAN	2000	IND	1	0.190495	0.0471769	0	0	0.222013	4.0379	12.4578	0.26536	0.0318815	10.26	0.0455538	0.00457767	0.0501315	0.0501315	0.190495	0.0471769	26.2064	602526	29832.7	0.809505	0.221382
2011	260	SC Firm 260	7	IN	1	MAN	2000	IND	1	0.191971	0.0358993	0	0	0.213371	5.34749	12.55	0.216973	0.00476404	6.63835	0.00458192	-0.0227422	-0.0181603	-0.0181603	0.191971	0.0358993	29.8384	820769	30562.2	0.808029	0.213525
2012	261	SC Firm 261	7	IN	1	MAN	3000	CGOODS	1	0.294715	0.0653226	0.0396988	0.00686659	0.175812	4.51169	14.2696	0.160069	0.0328783	5.08142	-0.0206829	-0.0001522	-0.0208351	-0.0208351	0.294715	0.0653226	173.062	6059900	423513	0.705285	0.265559
2013	261	SC Firm 261	7	IN	1	MAN	3000	CGOODS	1	0.292059	0.0666717	0.0282675	0.00501178	0.154426	4.38056	14.164	0.154763	0.0126072	6.89922	-0.00231837	-0.000448506	-0.00276687	-0.00276687	0.292059	0.0666717	162.915	5882013	420178	0.707941	0.271466
2014	261	SC Firm 261	7	IN	1	MAN	3000	CGOODS	1	0.295644	0.036929	0.0150418	0.00139319	0.197674	7.29543	14.4784	0.119214	0.0240351	7.28625	0.0447594	-2.40417e-05	0.0447354	0.0447354	0.295644	0.036929	281.698	12912762	495141	0.704356	0.284887
2007	262	SC Firm 262	7	IN	1	MAN	1	OILGAS	1	0.0846403	0.0273903	0.0103064	0.00760774	0.00714097	1.34521	12.457	0.094264	0.00505411	9.80136	-0.0913591	0.111466	0.0201065	0.0201065	0.0846403	0.0273903	6.5325	10349357	291455	0.91536	0.0775952
2008	262	SC Firm 262	7	IN	1	MAN	1	OILGAS	1	0.151551	0.142111	0.11532	0.10785	0.0116603	1.06642	12.5545	0.166126	0.00301901	3.89096	0.11414	-0.14871	-0.0345698	-0.0345698	0.151551	0.142111	6.08082	7127503	1.18069e+06	0.848449	0.0775952
2009	262	SC Firm 262	7	IN	1	MAN	1	OILGAS	1	0.124486	0.0798353	0.0901305	0.0570004	0.0169301	1.55928	12.8002	0.249277	0.00356224	8.47979	-0.0104103	0.0912999	0.0808896	0.0808896	0.124486	0.0798353	7.44407	12558149	1.08957e+06	0.875514	0.0775952
2010	262	SC Firm 262	7	IN	1	MAN	1	OILGAS	1	0.12155	0.0801127	0.0615025	0.0396126	0.180312	1.51724	14.6522	0.257329	0.0976735	10.26	0.0172847	0.0087448	0.0260295	0.0260295	0.12155	0.0801127	5.92813	14584895	1.27019e+06	0.87845	0.0775952
2011	262	SC Firm 262	7	IN	1	MAN	1	OILGAS	1	0.0846403	0.0637983	0.0249231	0.0186969	0.175474	1.31292	14.662	0.251208	0.00429651	6.63835	-0.0371184	-0.0841374	-0.121256	-0.121256	0.0846403	0.0637983	5.80287	12915819	880159	0.91536	0.0775952
2012	262	SC Firm 262	7	IN	1	MAN	1	OILGAS	1	0.108913	0.100718	0	0	0.241896	1.08137	14.9875	0.233283	0.0417356	5.08142	0.020523	-0.208	-0.187477	-0.187477	0.108913	0.100718	5.23867	9683393	1.08452e+06	0.891087	0.117499
2013	262	SC Firm 262	7	IN	1	MAN	1	OILGAS	1	0.114457	0.109693	0	0	0.209201	1.04343	14.9555	0.205575	0.0237722	6.89922	0.0153942	-0.0304749	-0.0150807	-0.0150807	0.114457	0.109693	3.81644	10170202	1.25305e+06	0.885543	0.125655
2014	262	SC Firm 262	7	IN	1	MAN	1	OILGAS	1	0.100132	0.142121	0	0	0.160212	0.751684	14.6706	0.1617	0.0595991	7.28625	-0.0166367	-0.0211067	-0.0377434	-0.0377434	0.100132	0.142121	2.08616	6486083	1.07452e+06	0.899868	0.119162
2009	263	SC Firm 263	7	IN	0	SERV	4000	HCARE	1	0.166834	0.0442134	0.00686906	0.00159528	0.157313	3.77338	13.9948	0.368773	0.00713274	8.47979	-0.093786	0.110217	0.016431	0.016431	0.166834	0.0442134	8.27293	5884086	272190	0.833166	0.185582
2010	263	SC Firm 263	7	IN	0	SERV	4000	HCARE	1	0.199775	0.0639847	0.0802502	0.0233338	0.159837	3.12224	14.1665	0.393121	0.00252231	10.26	0.0588149	0.00539284	0.0642078	0.0642078	0.199775	0.0639847	6.03471	5643169	385759	0.800225	0.154745
2011	263	SC Firm 263	7	IN	0	SERV	4000	HCARE	1	0.158037	0.0552383	0.00682791	0.00213691	0.18136	2.861	14.1377	0.383609	0.0140884	6.63835	-0.0518458	-0.0238797	-0.0757255	-0.0757255	0.158037	0.0552383	7.53319	4967981	290468	0.841963	0.177195
2012	263	SC Firm 263	7	IN	0	SERV	4000	HCARE	1	0.202298	0.0711414	0.0972226	0.0314998	0.19018	2.8436	14.2377	0.341151	0.00980308	5.08142	0.0670644	-0.00452816	0.0625362	0.0625362	0.202298	0.0711414	6.48544	5673260	434515	0.797702	0.140542
2013	263	SC Firm 263	7	IN	0	SERV	4000	HCARE	1	0.226888	0.0933728	0.110469	0.0417614	0.160386	2.42992	14.3434	0.324517	0.0206831	6.89922	0.0323601	-0.0249651	0.00739493	0.00739493	0.226888	0.0933728	9.93812	4920882	506798	0.773112	0.154144
2014	263	SC Firm 263	7	IN	0	SERV	4000	HCARE	1	0.291668	0.0736756	0.135998	0.0295067	0.137637	3.95881	14.4153	0.297467	0.0191325	7.28625	0.0908475	-0.0185777	0.0722698	0.0722698	0.291668	0.0736756	9.81521	9254536	736064	0.708332	0.201279
2004	264	SC Firm 264	7	IN	1	MAN	2000	IND	1	0.129993	0.0500167	0.0176903	0.00630581	0.298759	2.599	13.0331	0.657775	0.00846961	7.92294	-0.0102906	0.00571525	-0.00457534	-0.00457534	0.129993	0.0500167	10.7435	1190097	62658.7	0.870007	0.176564
2005	264	SC Firm 264	7	IN	1	MAN	2000	IND	1	0.138804	0.03657	0.0289785	0.00697926	0.268808	3.79557	13.2122	0.583946	0.0214647	9.28483	0.0314129	0.00351947	0.0349324	0.0349324	0.138804	0.03657	16.061	2133586	80987	0.861196	0.168528
2006	264	SC Firm 264	7	IN	1	MAN	2000	IND	1	0.151384	0.0388483	0.0482606	0.0113586	0.270329	3.89679	13.4737	0.531518	0.00367872	9.26396	0.0454728	0.00904473	0.0545176	0.0545176	0.151384	0.0388483	16.3078	2864003	115759	0.848616	0.159076
2007	264	SC Firm 264	7	IN	1	MAN	2000	IND	1	0.151648	0.0499236	0.0490859	0.0149473	0.222499	3.0376	13.642	0.472441	0.0331679	9.80136	0.03434	0.00863491	0.0429749	0.0429749	0.151648	0.0499236	8.46645	2847838	149645	0.848352	0.154621
2008	264	SC Firm 264	7	IN	1	MAN	2000	IND	1	0.146156	0.0652978	0.0373737	0.0155981	0.201076	2.23829	13.434	0.481815	0.0140565	3.89096	-0.0179811	0.00403827	-0.0139429	-0.0139429	0.146156	0.0652978	18.7981	1907422	133252	0.853844	0.157274
2009	264	SC Firm 264	7	IN	1	MAN	2000	IND	1	0.130755	0.0393023	0.0218194	0.00602995	0.184461	3.3269	13.6325	0.460611	0.0122769	8.47979	0.0159813	0.0111925	0.0271738	0.0271738	0.130755	0.0393023	18.8978	3710715	151806	0.869245	0.154474
2010	264	SC Firm 264	7	IN	1	MAN	2000	IND	1	0.104265	0.0381288	0.0113774	0.00390384	0.176154	2.73455	13.6829	0.426001	0.00525511	10.26	-0.0128842	0.00116895	-0.0117152	-0.0117152	0.104265	0.0381288	10.5515	3408409	135110	0.895735	0.133608
2011	264	SC Firm 264	7	IN	1	MAN	2000	IND	1	0.108926	0.0524587	0.0156188	0.00713474	0.157363	2.07641	13.6	0.387359	0.0126535	6.63835	0.00331371	-0.00555277	-0.00223906	-0.00223906	0.108926	0.0524587	11.1529	2517014	139349	0.891074	0.132247
2012	264	SC Firm 264	7	IN	1	MAN	2000	IND	1	0.102101	0.0517633	0.00742287	0.0035773	0.145123	1.97245	13.6157	0.404068	0.00827836	5.08142	-0.00247028	0.000748699	-0.00172158	-0.00172158	0.102101	0.0517633	11.8115	2492395	136057	0.897899	0.133301
[truncated: 8,761 more rows]
